# Supplementary material for: A Jungle in There: Bacteria in Belly Buttons are Highly Diverse, but Predictable
Source: PLoS One. 2012 Nov 7;7(11):e47712. doi: 10.1371/journal.pone.0047712 (PMC3492386; doi:10.1371/journal.pone.0047712)
Supplement: Supporting Information S1 — MS Excel workbook with 4 sheets. Sheet#1: sample grouping: Two groups of samples originating from two collecting events. Sheet #2: DATA list: “Sample” is a belly button sample identifier; “reads/400” is the number of reads of a particular phylotype in a given sample after a rarefaction to 400 reads per sample. Sheet #3: DATA table lists belly button samples on the top row and phylotype identifiers in the first column. Numbers in the table indicate sequencing read numbers. Sheet #4: “New Taxonomy JH” is a list of taxonomic identifiers for our prokaryotic phylotypes. It originated from an automated RDP-based classifier in QIIME, with manual identification of unclear taxa by NCBI BLAST by JH. (XLS) [file pone.0047712.s001.xls]

## Sheet: sample grouping
sample	collection
B1234	BellyButtonsMuseum2
B1235	BellyButtonsMuseum2
B1236	BellyButtonsMuseum2
B1237	BellyButtonsMuseum2
B1242	BellyButtonsMuseum2
B1243	BellyButtonsMuseum2
B1246	BellyButtonsMuseum2
B1253	BellyButtonsMuseum2
B1254	BellyButtonsMuseum2
B1258	BellyButtonsMuseum2
B1259	BellyButtonsMuseum2
B1260	BellyButtonsMuseum2
B1264	BellyButtonsMuseum2
B1265	BellyButtonsMuseum2
B1273	BellyButtonsMuseum2
B1275	BellyButtonsMuseum2
B1278	BellyButtonsMuseum2
B1280	BellyButtonsMuseum2
B1282	BellyButtonsMuseum2
B1283	BellyButtonsMuseum2
B1284	BellyButtonsMuseum2
B1285	BellyButtonsMuseum2
B1286	BellyButtonsMuseum2
B1288	BellyButtonsMuseum2
B1289	BellyButtonsMuseum2
B1291	BellyButtonsMuseum2
B1292	BellyButtonsMuseum2
B1293	BellyButtonsMuseum2
B1294	BellyButtonsMuseum2
B1295	BellyButtonsMuseum2
B1296	BellyButtonsMuseum2
B1298	BellyButtonsMuseum2
B1308	BellyButtonsMuseum2
B1310	BellyButtonsMuseum2
B1374	BellyButtonsMuseum2
B940	BellyButtonsScienceOnline
B941	BellyButtonsScienceOnline
B944	BellyButtonsScienceOnline
B945	BellyButtonsScienceOnline
B946	BellyButtonsScienceOnline
B947	BellyButtonsScienceOnline
B948	BellyButtonsScienceOnline
B950	BellyButtonsScienceOnline
B952	BellyButtonsScienceOnline
B953	BellyButtonsScienceOnline
B954	BellyButtonsScienceOnline
B955	BellyButtonsScienceOnline
B956	BellyButtonsScienceOnline
B957	BellyButtonsScienceOnline
B958	BellyButtonsScienceOnline
B961	BellyButtonsScienceOnline
B962	BellyButtonsScienceOnline
B963	BellyButtonsScienceOnline
B966	BellyButtonsScienceOnline
B967	BellyButtonsScienceOnline
B968	BellyButtonsScienceOnline
B971	BellyButtonsScienceOnline
B972	BellyButtonsScienceOnline
B974	BellyButtonsScienceOnline
B975	BellyButtonsScienceOnline

## Sheet: DATA list
sample	best available identification	reads/400
B1234	Actinobacteridae	1			sample:	belly button sample identifier
B1234	Actinobacteridae	2			reads/400:	the number of reads of a particular phylotype in a given sample after a rarefaction to 400 reads per sample
B1234	Actinobacteridae	5
B1234	Actinomyces	7
B1234	Anaerococcus	1
B1234	Anaerococcus	1
B1234	Anaerococcus	1
B1234	Anaerococcus	1
B1234	Anaerococcus	1
B1234	Anaerococcus	11
B1234	Anaerococcus	2
B1234	Anaerococcus	4
B1234	Anaerococcus	56
B1234	Anaerococcus	8
B1234	Bacteroidetes	43
B1234	Caenibacterium	1
B1234	Campylobacter	2
B1234	Campylobacter	7
B1234	Campylobacterales	1
B1234	Clostridiales	1
B1234	Clostridiales	1
B1234	Clostridiales	2
B1234	Clostridiales	9
B1234	Corynebacterineae	1
B1234	Corynebacterineae	1
B1234	Corynebacterium	1
B1234	Corynebacterium	2
B1234	Dialister	2
B1234	Finegoldia	1
B1234	Finegoldia	37
B1234	Firmicutes	1
B1234	Mobiluncus	29
B1234	Peptoniphilus	1
B1234	Peptoniphilus	16
B1234	Peptoniphilus	35
B1234	Peptoniphilus	9
B1234	Porphyromonas	1
B1234	Porphyromonas	23
B1234	Prevotella	9
B1234	Sphingobacterium	1
B1234	unidentified	1
B1234	unidentified	1
B1234	unidentified	1
B1234	unidentified	1
B1234	unidentified	40
B1234	unidentified	6
B1234	unidentified	9
B1234	Varibaculum	3
B1235	Aerococcaceae	1
B1235	Anaerococcus	1
B1235	Anaerococcus	1
B1235	Anaerococcus	1
B1235	Anaerococcus	1
B1235	Anaerococcus	1
B1235	Anaerococcus	3
B1235	Anaerococcus	39
B1235	Anaerococcus	6
B1235	Anaerococcus	6
B1235	Bacteroidetes	1
B1235	Bacteroidetes	1
B1235	Bacteroidetes	1
B1235	Bacteroidetes	2
B1235	Bacteroidetes	21
B1235	Bacteroidetes	3
B1235	Campylobacter	4
B1235	Clostridiales	1
B1235	Clostridiales	1
B1235	Clostridiales	1
B1235	Clostridiales	1
B1235	Clostridiales	1
B1235	Clostridiales	1
B1235	Clostridiales	29
B1235	Clostridiales	3
B1235	Clostridiales	9
B1235	Corynebacterineae	1
B1235	Corynebacterineae	14
B1235	Corynebacterineae	4
B1235	Corynebacterium	2
B1235	Corynebacterium	2
B1235	Corynebacterium	36
B1235	Cupriavidus	1
B1235	Dermabacter	1
B1235	Dialister	1
B1235	Dialister	4
B1235	Fastidiosipila	1
B1235	Finegoldia	1
B1235	Finegoldia	9
B1235	Lactobacillales	1
B1235	Lactobacillales	18
B1235	Mobiluncus	3
B1235	Pasteurellaceae	1
B1235	Peptococcus	1
B1235	Peptoniphilus	1
B1235	Peptoniphilus	1
B1235	Peptoniphilus	1
B1235	Peptoniphilus	1
B1235	Peptoniphilus	1
B1235	Peptoniphilus	10
B1235	Peptoniphilus	40
B1235	Porphyromonadaceae	1
B1235	Porphyromonas	1
B1235	Porphyromonas	11
B1235	Prevotella	2
B1235	Prevotella	7
B1235	Prevotella	9
B1235	Prevotellaceae	1
B1235	Prevotellaceae	1
B1235	Staphylococcus	21
B1235	unidentified	1
B1235	unidentified	1
B1235	unidentified	1
B1235	unidentified	2
B1235	unidentified	2
B1235	unidentified	3
B1235	unidentified	37
B1235	Varibaculum	1
B1235	Veillonellaceae	2
B1236	Acinetobacter	1
B1236	Actinobacteridae	1
B1236	Actinobacteridae	38
B1236	Actinobacteridae	8
B1236	Actinomyces	1
B1236	Actinomyces	13
B1236	Actinomycetales	1
B1236	Aerococcaceae	2
B1236	Anaerococcus	1
B1236	Anaerococcus	1
B1236	Anaerococcus	1
B1236	Anaerococcus	1
B1236	Anaerococcus	1
B1236	Anaerococcus	1
B1236	Anaerococcus	1
B1236	Anaerococcus	1
B1236	Anaerococcus	1
B1236	Anaerococcus	11
B1236	Anaerococcus	2
B1236	Anaerococcus	28
B1236	Anaerococcus	42
B1236	Anaerococcus	55
B1236	Bacteroidetes	1
B1236	Bacteroidetes	1
B1236	Bacteroidetes	15
B1236	Chloroplast	1
B1236	Corynebacterineae	1
B1236	Corynebacterineae	1
B1236	Corynebacterineae	1
B1236	Corynebacterineae	1
B1236	Corynebacterineae	2
B1236	Corynebacterineae	2
B1236	Corynebacterineae	2
B1236	Corynebacterineae	3
B1236	Corynebacterineae	84
B1236	Corynebacterium	1
B1236	Corynebacterium	14
B1236	Corynebacterium	24
B1236	Dermabacter	9
B1236	Finegoldia	13
B1236	Mobiluncus	2
B1236	Peptoniphilus	5
B1236	Prevotella	2
B1236	Propionibacteriaceae	1
B1236	Turicella	2
B1237	Actinobacteridae	1
B1237	Actinobacteridae	1
B1237	Actinobacteridae	1
B1237	Aerococcaceae	2
B1237	Anaerococcus	1
B1237	Anaerococcus	1
B1237	Anaerococcus	1
B1237	Anaerococcus	1
B1237	Anaerococcus	1
B1237	Anaerococcus	1
B1237	Anaerococcus	1
B1237	Anaerococcus	1
B1237	Anaerococcus	17
B1237	Anaerococcus	2
B1237	Anaerococcus	5
B1237	Anaerococcus	50
B1237	Anaerococcus	61
B1237	Bacillales	1
B1237	Bacillales	1
B1237	Bacilli	1
B1237	Bacilli	1
B1237	Bacilli	4
B1237	Bacillus	1
B1237	Bacteroidetes	2
B1237	Bradyrhizobiaceae	1
B1237	Chloroplast	1
B1237	Chloroplast	2
B1237	Clostridiales	1
B1237	Clostridiales	1
B1237	Corynebacterineae	1
B1237	Corynebacterineae	1
B1237	Corynebacterineae	2
B1237	Corynebacterineae	5
B1237	Corynebacterium	6
B1237	Dermabacter	1
B1237	Enterobacteriaceae	1
B1237	Fastidiosipila	1
B1237	Finegoldia	1
B1237	Finegoldia	1
B1237	Finegoldia	27
B1237	Firmicutes	1
B1237	Firmicutes	1
B1237	Flavobacteriaceae	1
B1237	Ignavigranum	1
B1237	Lactobacillales	1
B1237	Mobiluncus	1
B1237	Peptococcus	1
B1237	Peptoniphilus	1
B1237	Peptoniphilus	1
B1237	Peptoniphilus	1
B1237	Peptoniphilus	1
B1237	Peptoniphilus	2
B1237	Peptoniphilus	21
B1237	Porphyromonadaceae	1
B1237	Staphylococcaceae	1
B1237	Staphylococcus	1
B1237	Staphylococcus	1
B1237	Staphylococcus	146
B1237	unidentified	1
B1237	unidentified	1
B1237	unidentified	1
B1237	Varibaculum	1
B1242	Actinobacteridae	1
B1242	Actinobacteridae	1
B1242	Actinobacteridae	1
B1242	Actinobacteridae	1
B1242	Actinobacteridae	2
B1242	Aerococcaceae	4
B1242	Anaerococcus	1
B1242	Anaerococcus	1
B1242	Anaerococcus	1
B1242	Anaerococcus	1
B1242	Anaerococcus	1
B1242	Anaerococcus	1
B1242	Anaerococcus	1
B1242	Anaerococcus	1
B1242	Anaerococcus	14
B1242	Anaerococcus	3
B1242	Anaerococcus	3
B1242	Anaerococcus	4
B1242	Anaerococcus	4
B1242	Anaerococcus	53
B1242	Bacteroidetes	7
B1242	Branhamella	1
B1242	Campylobacter	5
B1242	Chloroplast	1
B1242	Clostridia	1
B1242	Clostridiales	1
B1242	Clostridiales	10
B1242	Clostridiales	4
B1242	Corynebacterineae	1
B1242	Corynebacterineae	1
B1242	Corynebacterineae	4
B1242	Corynebacterineae	4
B1242	Corynebacterium	1
B1242	Corynebacterium	1
B1242	Corynebacterium	5
B1242	Corynebacterium	7
B1242	Corynebacterium	92
B1242	Dermabacter	3
B1242	Dialister	4
B1242	Finegoldia	1
B1242	Finegoldia	3
B1242	Finegoldia	47
B1242	Lactobacillales	8
B1242	Mobiluncus	1
B1242	Peptococcus	1
B1242	Peptoniphilus	1
B1242	Peptoniphilus	1
B1242	Peptoniphilus	1
B1242	Peptoniphilus	15
B1242	Peptoniphilus	2
B1242	Porphyromonas	3
B1242	Prevotella	1
B1242	Prevotella	3
B1242	Staphylococcus	1
B1242	Staphylococcus	1
B1242	Staphylococcus	38
B1242	unidentified	1
B1242	unidentified	12
B1242	unidentified	2
B1242	unidentified	2
B1242	Veillonellaceae	3
B1243	Acinetobacter	1
B1243	Acinetobacter	3
B1243	Actinobacteridae	1
B1243	Actinobacteridae	18
B1243	Aerococcaceae	3
B1243	Aerococcus	1
B1243	Anaerococcus	1
B1243	Anaerococcus	1
B1243	Anaerococcus	1
B1243	Anaerococcus	2
B1243	Anaerococcus	2
B1243	Anaerococcus	2
B1243	Anaerococcus	26
B1243	Anaerococcus	26
B1243	Anaerococcus	4
B1243	Anaerococcus	4
B1243	Aquabacterium	3
B1243	Arcanobacterium	1
B1243	Bacilli	1
B1243	Bacilli	1
B1243	Bacilli	2
B1243	Bacteroidetes	1
B1243	Bacteroidetes	1
B1243	Bacteroidetes	1
B1243	Bacteroidetes	6
B1243	Bradyrhizobiaceae	2
B1243	Branhamella	11
B1243	Brevibacterium	3
B1243	Burkholderiales	1
B1243	Campylobacter	2
B1243	Chloroplast	14
B1243	Cloacibacterium	7
B1243	Clostridiales	1
B1243	Clostridiales	12
B1243	Clostridiales	3
B1243	Corynebacterineae	2
B1243	Corynebacterineae	34
B1243	Corynebacterium	1
B1243	Corynebacterium	1
B1243	Corynebacterium	1
B1243	Corynebacterium	3
B1243	Corynebacterium	38
B1243	Dermabacter	9
B1243	Faecalibacterium	5
B1243	Finegoldia	1
B1243	Finegoldia	5
B1243	Lactobacillales	2
B1243	Micrococcus	2
B1243	Moraxellaceae	1
B1243	Mycobacterium	1
B1243	Ornithinimicrobium	1
B1243	Peptoniphilus	11
B1243	Peptoniphilus	3
B1243	Porphyromonadaceae	1
B1243	Porphyromonas	1
B1243	Porphyromonas	3
B1243	Prevotella	1
B1243	Pseudomonas	1
B1243	Pseudomonas	2
B1243	Ralstonia	2
B1243	Rhodococcus	1
B1243	Sphingomonas	2
B1243	Staphylococcaceae	1
B1243	Staphylococcus	81
B1243	unidentified	1
B1243	unidentified	1
B1243	unidentified	1
B1243	unidentified	1
B1243	unidentified	3
B1243	unidentified	5
B1243	Veillonella	2
B1246	Actinobacteridae	1
B1246	Actinobacteridae	17
B1246	Actinobacteridae	3
B1246	Actinomyces	1
B1246	Actinomyces	4
B1246	Actinomycetales	1
B1246	Actinomycetales	1
B1246	Anaerococcus	1
B1246	Anaerococcus	1
B1246	Anaerococcus	1
B1246	Anaerococcus	1
B1246	Anaerococcus	1
B1246	Anaerococcus	1
B1246	Anaerococcus	1
B1246	Anaerococcus	1
B1246	Anaerococcus	1
B1246	Anaerococcus	1
B1246	Anaerococcus	10
B1246	Anaerococcus	14
B1246	Anaerococcus	16
B1246	Anaerococcus	2
B1246	Anaerococcus	2
B1246	Anaerococcus	2
B1246	Anaerococcus	2
B1246	Anaerococcus	3
B1246	Anaerococcus	3
B1246	Anaerococcus	3
B1246	Anaerococcus	36
B1246	Anaerococcus	6
B1246	Anaerococcus	9
B1246	Bacteroidetes	1
B1246	Bacteroidetes	2
B1246	Bacteroidetes	35
B1246	Campylobacter	5
B1246	Clostridiales	1
B1246	Clostridiales	1
B1246	Clostridiales	1
B1246	Clostridiales	1
B1246	Clostridiales	1
B1246	Clostridiales	1
B1246	Clostridiales	1
B1246	Clostridiales	1
B1246	Clostridiales	1
B1246	Clostridiales	1
B1246	Clostridiales	13
B1246	Clostridiales	3
B1246	Clostridiales	4
B1246	Clostridiales	8
B1246	Corynebacterineae	1
B1246	Corynebacterium	5
B1246	Fastidiosipila	2
B1246	Finegoldia	3
B1246	Firmicutes	1
B1246	Firmicutes	1
B1246	Firmicutes	1
B1246	Firmicutes	1
B1246	Firmicutes	1
B1246	Firmicutes	1
B1246	Firmicutes	1
B1246	Firmicutes	1
B1246	Firmicutes	14
B1246	Fusobacterium	1
B1246	Peptococcus	2
B1246	Peptoniphilus	1
B1246	Peptoniphilus	1
B1246	Peptoniphilus	1
B1246	Peptoniphilus	1
B1246	Peptoniphilus	18
B1246	Peptoniphilus	35
B1246	Porphyromonas	1
B1246	Porphyromonas	3
B1246	Prevotella	1
B1246	Pseudonocardia	1
B1246	Staphylococcaceae	1
B1246	Staphylococcus	1
B1246	Staphylococcus	8
B1246	unidentified	1
B1246	unidentified	1
B1246	unidentified	1
B1246	unidentified	1
B1246	unidentified	1
B1246	unidentified	1
B1246	unidentified	1
B1246	unidentified	1
B1246	unidentified	1
B1246	unidentified	13
B1246	unidentified	22
B1246	unidentified	9
B1246	Varibaculum	1
B1246	Varibaculum	7
B1246	Veillonellaceae	3
B1253	Acinetobacter	4
B1253	Actinobacteridae	1
B1253	Actinobacteridae	1
B1253	Actinobacteridae	3
B1253	Actinobacteridae	6
B1253	Aerococcaceae	6
B1253	Anaerococcus	1
B1253	Anaerococcus	1
B1253	Anaerococcus	1
B1253	Anaerococcus	1
B1253	Anaerococcus	1
B1253	Anaerococcus	1
B1253	Anaerococcus	11
B1253	Anaerococcus	2
B1253	Anaerococcus	2
B1253	Anaerococcus	21
B1253	Anaerococcus	3
B1253	Anaerococcus	4
B1253	Anaerococcus	6
B1253	Bacteroidetes	1
B1253	Bacteroidetes	1
B1253	Bacteroidetes	2
B1253	Bacteroidetes	26
B1253	Bacteroidetes	4
B1253	Brachybacterium	2
B1253	Bradyrhizobiaceae	3
B1253	Branhamella	1
B1253	Brevibacterium	1
B1253	Brevibacterium	6
B1253	Brevundimonas	1
B1253	Burkholderiales	1
B1253	Caulobacter	1
B1253	Chloroplast	1
B1253	Clostridiales	1
B1253	Clostridiales	1
B1253	Clostridiales	2
B1253	Clostridiales	5
B1253	Clostridiales	6
B1253	Corynebacterineae	1
B1253	Corynebacterineae	2
B1253	Corynebacterineae	3
B1253	Corynebacterineae	40
B1253	Corynebacterium	1
B1253	Corynebacterium	1
B1253	Corynebacterium	12
B1253	Corynebacterium	21
B1253	Dermabacter	3
B1253	Dialister	3
B1253	Finegoldia	5
B1253	Firmicutes	1
B1253	Granulicatella	2
B1253	Lactobacillales	4
B1253	Mesorhizobium	4
B1253	Methylobacterium	1
B1253	Mobiluncus	1
B1253	Mobiluncus	3
B1253	Novosphingobium	4
B1253	Peptococcus	1
B1253	Peptoniphilus	1
B1253	Peptoniphilus	1
B1253	Peptoniphilus	13
B1253	Peptoniphilus	2
B1253	Peptoniphilus	4
B1253	Polyangiaceae	1
B1253	Porphyromonadaceae	1
B1253	Porphyromonadaceae	7
B1253	Porphyromonas	2
B1253	Porphyromonas	3
B1253	Prevotella	1
B1253	Prevotella	2
B1253	Prevotellaceae	2
B1253	Staphylococcaceae	2
B1253	Staphylococcus	30
B1253	Streptococcus	1
B1253	Terrimonas	1
B1253	unidentified	1
B1253	unidentified	1
B1253	unidentified	1
B1253	unidentified	14
B1253	unidentified	2
B1253	unidentified	2
B1253	unidentified	24
B1253	unidentified	4
B1253	unidentified	6
B1253	unidentified	7
B1253	unidentified	9
B1254	Acidobacteriaceae	1
B1254	Acidobacteriaceae	1
B1254	Acinetobacter	1
B1254	Actinobacteridae	1
B1254	Actinobacteridae	1
B1254	Actinobacteridae	2
B1254	Actinomycetales	1
B1254	Aerococcaceae	1
B1254	Aerococcaceae	1
B1254	Anaerococcus	1
B1254	Anaerococcus	1
B1254	Anaerococcus	1
B1254	Anaerococcus	1
B1254	Anaerococcus	2
B1254	Anaerococcus	3
B1254	Anaerococcus	4
B1254	Anaerococcus	6
B1254	Aquabacterium	3
B1254	Bacteroidetes	2
B1254	Bacteroidetes	4
B1254	Bacteroidetes	7
B1254	Betaproteobacteria	2
B1254	Bradyrhizobiaceae	4
B1254	Branhamella	16
B1254	Brucellaceae	1
B1254	Cloacibacterium	1
B1254	Clostridiales	1
B1254	Corynebacterineae	1
B1254	Corynebacterineae	1
B1254	Corynebacterineae	53
B1254	Corynebacterium	1
B1254	Corynebacterium	155
B1254	Corynebacterium	2
B1254	Corynebacterium	26
B1254	Corynebacterium	6
B1254	Finegoldia	1
B1254	Flavobacteriaceae	10
B1254	Methylophilaceae	2
B1254	Microbacteriaceae	1
B1254	Microbacteriaceae	1
B1254	Microbacteriaceae	4
B1254	Microbacteriaceae	4
B1254	Microbacteriaceae	7
B1254	Micrococcus	1
B1254	Myxococcales	1
B1254	Novosphingobium	1
B1254	Phenylobacterium	5
B1254	Proteobacteria	1
B1254	Proteobacteria	1
B1254	Proteobacteria	1
B1254	Ralstonia	1
B1254	Rhodospirillales	1
B1254	Sphingobacteriales	2
B1254	Staphylococcus	1
B1254	Staphylococcus	22
B1254	Terrimonas	2
B1254	unidentified	3
B1254	Zimmermannella	12
B1258	Achromobacter	13
B1258	Acidobacteriaceae	1
B1258	Actinobacteridae	1
B1258	Actinobacteridae	2
B1258	Actinobacteridae	5
B1258	Actinomycetales	1
B1258	Aerococcaceae	16
B1258	Anaerococcus	1
B1258	Anaerococcus	1
B1258	Anaerococcus	1
B1258	Anaerococcus	1
B1258	Anaerococcus	1
B1258	Anaerococcus	1
B1258	Anaerococcus	1
B1258	Anaerococcus	1
B1258	Anaerococcus	1
B1258	Anaerococcus	10
B1258	Anaerococcus	16
B1258	Anaerococcus	18
B1258	Anaerococcus	3
B1258	Anaerococcus	3
B1258	Anaerococcus	8
B1258	Bacteroidetes	10
B1258	Bacteroidetes	6
B1258	Bradyrhizobiaceae	4
B1258	Campylobacter	1
B1258	Chryseobacterium	1
B1258	Clostridiales	1
B1258	Clostridiales	1
B1258	Clostridiales	18
B1258	Clostridiales	2
B1258	Clostridiales	3
B1258	Clostridiales	3
B1258	Clostridiales	9
B1258	Coriobacteriaceae	4
B1258	Corynebacterineae	1
B1258	Corynebacterineae	14
B1258	Corynebacterineae	15
B1258	Corynebacterium	19
B1258	Corynebacterium	2
B1258	Corynebacterium	2
B1258	Crenotrichaceae	2
B1258	Dermabacter	9
B1258	Dialister	1
B1258	Finegoldia	1
B1258	Firmicutes	1
B1258	Lactobacillales	9
B1258	Leuconostoc	1
B1258	Micrococcaceae	3
B1258	Mobiluncus	2
B1258	Novosphingobium	7
B1258	Peptoniphilus	1
B1258	Peptoniphilus	1
B1258	Peptoniphilus	23
B1258	Peptoniphilus	8
B1258	Phenylobacterium	5
B1258	Porphyromonadaceae	1
B1258	Porphyromonas	22
B1258	Prevotella	1
B1258	Prevotella	2
B1258	Prevotellaceae	1
B1258	Proteobacteria	1
B1258	Pseudomonas	1
B1258	Rhizobiales	1
B1258	Rhodobacteraceae	1
B1258	Rhodospirillales	3
B1258	Sphingobacteriales	3
B1258	Sphingobacterium	2
B1258	Staphylococcus	1
B1258	Staphylococcus	14
B1258	Streptococcus	4
B1258	Terrimonas	3
B1258	unidentified	1
B1258	unidentified	1
B1258	unidentified	1
B1258	unidentified	1
B1258	unidentified	1
B1258	unidentified	1
B1258	unidentified	1
B1258	unidentified	1
B1258	unidentified	16
B1258	unidentified	2
B1258	unidentified	4
B1258	unidentified	4
B1258	unidentified	5
B1258	Varibaculum	3
B1258	Veillonellaceae	1
B1259	Acinetobacter	1
B1259	Acinetobacter	1
B1259	Acinetobacter	127
B1259	Acinetobacter	4
B1259	Actinobacteridae	11
B1259	Actinomycetales	1
B1259	Anaerococcus	1
B1259	Anaerococcus	4
B1259	Anaerococcus	6
B1259	Arsenicicoccus	8
B1259	Bacillales	1
B1259	Bacteroidetes	1
B1259	Bacteroidetes	1
B1259	Bacteroidetes	1
B1259	Bacteroidetes	10
B1259	Bacteroidetes	2
B1259	Blastococcus	2
B1259	Brachybacterium	2
B1259	Bradyrhizobiaceae	1
B1259	Branhamella	26
B1259	Burkholderiales	1
B1259	Burkholderiales	4
B1259	Chloroplast	5
B1259	Clostridiales	5
B1259	Corynebacterineae	1
B1259	Corynebacterineae	2
B1259	Corynebacterium	1
B1259	Corynebacterium	19
B1259	Corynebacterium	3
B1259	Erythrobacter	2
B1259	Fusobacterium	5
B1259	Gammaproteobacteria	2
B1259	Gordoniaceae	2
B1259	Halomonadaceae	1
B1259	Methylobacterium	1
B1259	Methylobacterium	1
B1259	Methylobacterium	1
B1259	Micrococcus	6
B1259	Moraxellaceae	3
B1259	Peptoniphilus	2
B1259	Peptostreptococcaceae	1
B1259	Porphyromonadaceae	1
B1259	Porphyromonadaceae	2
B1259	Prevotella	1
B1259	Prevotellaceae	1
B1259	Propionibacterium	1
B1259	Pseudomonadaceae	1
B1259	Pseudomonas	10
B1259	Pseudonocardiaceae	1
B1259	Pseudoxanthomonas	2
B1259	Ralstonia	1
B1259	Rhodobacteraceae	1
B1259	Rhodobacteraceae	2
B1259	Rhodobacteraceae	3
B1259	Rhodocyclaceae	2
B1259	Skermanella	1
B1259	Skermanella	3
B1259	Sphingomonadaceae	1
B1259	Sphingomonadaceae	2
B1259	Sphingomonas	7
B1259	Sphingopyxis	1
B1259	Spirosoma	4
B1259	Staphylococcus	2
B1259	Staphylococcus	28
B1259	Stenotrophomonas	1
B1259	Stenotrophomonas	1
B1259	Stenotrophomonas	3
B1259	Streptococcus	1
B1259	Streptococcus	1
B1259	Streptococcus	5
B1259	unidentified	1
B1259	unidentified	1
B1259	unidentified	2
B1259	unidentified	2
B1259	unidentified	2
B1259	unidentified	6
B1259	unidentified	9
B1259	Weissella	2
B1259	Xanthomonadaceae	1
B1259	Xanthomonadaceae	5
B1260	Acidobacteriaceae	1
B1260	Acidobacteriaceae	5
B1260	Acinetobacter	7
B1260	Actinobacteridae	10
B1260	Actinomycetaceae	1
B1260	Aerococcaceae	1
B1260	Agromonas	1
B1260	Alphaproteobacteria	1
B1260	Anaerococcus	1
B1260	Anaerococcus	1
B1260	Anaerococcus	1
B1260	Anaerococcus	1
B1260	Anaerococcus	1
B1260	Anaerococcus	1
B1260	Anaerococcus	1
B1260	Anaerococcus	12
B1260	Anaerococcus	2
B1260	Anaerococcus	36
B1260	Anaerococcus	38
B1260	Anaerococcus	4
B1260	Aquabacterium	1
B1260	Aquabacterium	4
B1260	Bacillaceae	1
B1260	Bacillales	1
B1260	Bacillales	2
B1260	Bacilli	1
B1260	Bacilli	1
B1260	Bacteroides	1
B1260	Bacteroidetes	10
B1260	Bacteroidetes	2
B1260	Bacteroidetes	2
B1260	Bacteroidetes	7
B1260	Bradyrhizobiaceae	8
B1260	Bradyrhizobium	1
B1260	Burkholderiales	1
B1260	Campylobacter	1
B1260	Campylobacter	2
B1260	Chloroplast	2
B1260	Clostridia	2
B1260	Clostridiales	1
B1260	Clostridiales	1
B1260	Clostridiales	2
B1260	Clostridiales	2
B1260	Clostridiales	7
B1260	Comamonadaceae	2
B1260	Corynebacterineae	1
B1260	Corynebacterineae	4
B1260	Corynebacterium	29
B1260	Dermabacter	2
B1260	Enterobacteriaceae	1
B1260	Finegoldia	1
B1260	Finegoldia	3
B1260	Firmicutes	1
B1260	Gammaproteobacteria	1
B1260	Gammaproteobacteria	2
B1260	Gemella	1
B1260	Hyphomicrobium	1
B1260	Lactobacillales	1
B1260	Lactobacillales	2
B1260	Methylophilaceae	3
B1260	Micrococcineae	1
B1260	Mobiluncus	1
B1260	Myxococcales	1
B1260	Novosphingobium	4
B1260	Peptococcus	5
B1260	Peptoniphilus	1
B1260	Peptoniphilus	1
B1260	Peptoniphilus	1
B1260	Peptoniphilus	6
B1260	Phenylobacterium	1
B1260	Phenylobacterium	3
B1260	Polyangiaceae	2
B1260	Porphyromonas	1
B1260	Prevotella	1
B1260	Prevotella	1
B1260	Proteobacteria	1
B1260	Pseudomonadaceae	1
B1260	Rhodobacteraceae	1
B1260	Rhodobacteraceae	1
B1260	Rhodospirillales	2
B1260	Rubrobacteraceae	1
B1260	Staphylococcus	1
B1260	Staphylococcus	1
B1260	Staphylococcus	82
B1260	Streptococcus	1
B1260	Streptococcus	1
B1260	Streptococcus	1
B1260	Streptococcus	5
B1260	Terrimonas	1
B1260	unidentified	1
B1260	unidentified	1
B1260	unidentified	11
B1260	unidentified	2
B1260	unidentified	3
B1260	unidentified	4
B1260	unidentified	4
B1264	Acidobacteriaceae	1
B1264	Acinetobacter	1
B1264	Actinobacteridae	1
B1264	Actinobacteridae	1
B1264	Actinobacteridae	5
B1264	Anaerococcus	1
B1264	Anaerococcus	1
B1264	Anaerococcus	1
B1264	Anaerococcus	12
B1264	Anaerococcus	3
B1264	Anaerococcus	5
B1264	Anaerococcus	6
B1264	Aquabacterium	2
B1264	Bacilli	1
B1264	Bacteroidetes	1
B1264	Bacteroidetes	1
B1264	Bacteroidetes	10
B1264	Bacteroidetes	3
B1264	Bacteroidetes	5
B1264	Betaproteobacteria	1
B1264	Betaproteobacteria	1
B1264	Betaproteobacteria	1
B1264	Bradyrhizobiaceae	1
B1264	Bradyrhizobiaceae	4
B1264	Bradyrhizobium	1
B1264	Brevibacterium	2
B1264	Burkholderiales	3
B1264	Campylobacter	1
B1264	Clostridia	2
B1264	Clostridiales	1
B1264	Clostridiales	22
B1264	Clostridiales	3
B1264	Clostridiales	4
B1264	Clostridiales	9
B1264	Corynebacterineae	1
B1264	Corynebacterineae	19
B1264	Corynebacterium	1
B1264	Corynebacterium	1
B1264	Corynebacterium	4
B1264	Crenotrichaceae	2
B1264	Dialister	4
B1264	Finegoldia	1
B1264	Finegoldia	13
B1264	Lactobacillales	4
B1264	Mesorhizobium	2
B1264	Methylophilaceae	5
B1264	Microbacteriaceae	1
B1264	Microbacteriaceae	1
B1264	Micromonosporaceae	1
B1264	Mobiluncus	9
B1264	Novosphingobium	19
B1264	Peptococcus	21
B1264	Peptoniphilus	1
B1264	Peptoniphilus	1
B1264	Peptoniphilus	2
B1264	Peptoniphilus	31
B1264	Peptoniphilus	4
B1264	Phenylobacterium	9
B1264	Porphyromonadaceae	2
B1264	Porphyromonas	2
B1264	Prevotella	4
B1264	Proteobacteria	1
B1264	Proteobacteria	3
B1264	Pseudomonas	1
B1264	Ralstonia	6
B1264	Rhizobiales	1
B1264	Rhodospirillales	1
B1264	Sphingobacteriales	6
B1264	Sphingomonas	1
B1264	Staphylococcus	7
B1264	Streptococcus	3
B1264	Streptococcus	3
B1264	Terrimonas	6
B1264	unidentified	1
B1264	unidentified	1
B1264	unidentified	1
B1264	unidentified	16
B1264	unidentified	2
B1264	unidentified	2
B1264	unidentified	21
B1264	unidentified	24
B1264	unidentified	4
B1264	unidentified	7
B1265	Acidobacteriaceae	1
B1265	Actinobacteridae	3
B1265	Actinobacteridae	7
B1265	Actinomycetaceae	3
B1265	Actinomycetales	1
B1265	Anaerococcus	1
B1265	Anaerococcus	1
B1265	Anaerococcus	3
B1265	Anaerococcus	8
B1265	Anaerococcus	8
B1265	Bacillales	1
B1265	Bacillales	1
B1265	Bacilli	2
B1265	Bacteroidetes	1
B1265	Bacteroidetes	1
B1265	Bacteroidetes	14
B1265	Bacteroidetes	5
B1265	Bradyrhizobiaceae	1
B1265	Bradyrhizobiaceae	1
B1265	Bradyrhizobiaceae	5
B1265	Branhamella	1
B1265	Brevibacterium	1
B1265	Cellvibrio	1
B1265	Chloroplast	1
B1265	Clostridia	4
B1265	Clostridiales	1
B1265	Clostridiales	15
B1265	Clostridiales	4
B1265	Clostridiales	5
B1265	Corynebacterineae	22
B1265	Corynebacterium	1
B1265	Corynebacterium	7
B1265	Dermabacter	1
B1265	Dialister	2
B1265	Finegoldia	1
B1265	Finegoldia	1
B1265	Finegoldia	1
B1265	Finegoldia	12
B1265	Lactobacillales	9
B1265	Limnobacter	1
B1265	Methanobrevibacter	3
B1265	Methylophilaceae	1
B1265	Microbulbifer	1
B1265	Mobiluncus	18
B1265	Novosphingobium	3
B1265	Paenibacillaceae	1
B1265	Pedomicrobium	1
B1265	Peptococcus	1
B1265	Peptococcus	13
B1265	Peptoniphilus	1
B1265	Peptoniphilus	1
B1265	Peptoniphilus	1
B1265	Peptoniphilus	1
B1265	Peptoniphilus	1
B1265	Peptoniphilus	1
B1265	Peptoniphilus	4
B1265	Peptoniphilus	43
B1265	Peptoniphilus	5
B1265	Phenylobacterium	2
B1265	Polyangiaceae	2
B1265	Porphyromonadaceae	7
B1265	Porphyromonas	2
B1265	Porphyromonas	3
B1265	Prevotella	3
B1265	Pseudomonas	1
B1265	Sphingomonas	1
B1265	Staphylococcus	7
B1265	Streptococcus	1
B1265	Terrimonas	2
B1265	unidentified	1
B1265	unidentified	1
B1265	unidentified	1
B1265	unidentified	1
B1265	unidentified	1
B1265	unidentified	1
B1265	unidentified	1
B1265	unidentified	1
B1265	unidentified	1
B1265	unidentified	12
B1265	unidentified	20
B1265	unidentified	27
B1265	unidentified	3
B1265	unidentified	37
B1265	Varibaculum	1
B1265	Veillonellaceae	1
B1273	Actinobacteridae	2
B1273	Actinomyces	1
B1273	Actinomycetales	1
B1273	Actinomycetales	1
B1273	Actinomycetales	1
B1273	Anaerococcus	1
B1273	Anaerococcus	1
B1273	Anaerococcus	1
B1273	Anaerococcus	1
B1273	Anaerococcus	1
B1273	Anaerococcus	1
B1273	Anaerococcus	1
B1273	Anaerococcus	1
B1273	Anaerococcus	1
B1273	Anaerococcus	1
B1273	Anaerococcus	1
B1273	Anaerococcus	11
B1273	Anaerococcus	22
B1273	Anaerococcus	24
B1273	Anaerococcus	4
B1273	Bacilli	1
B1273	Bacilli	1
B1273	Bacteroidetes	1
B1273	Bacteroidetes	30
B1273	Brevibacterium	2
B1273	Carnobacteriaceae	1
B1273	Carnobacteriaceae	1
B1273	Clostridiales	5
B1273	Corynebacterineae	2
B1273	Corynebacterineae	59
B1273	Corynebacterium	21
B1273	Corynebacterium	5
B1273	Dermabacter	1
B1273	Dermabacter	2
B1273	Finegoldia	1
B1273	Finegoldia	1
B1273	Finegoldia	1
B1273	Finegoldia	1
B1273	Finegoldia	57
B1273	Firmicutes	1
B1273	Lactobacillales	1
B1273	Lactobacillales	1
B1273	Lactobacillales	1
B1273	Lactobacillales	23
B1273	Microbacteriaceae	2
B1273	Micrococcineae	1
B1273	Micrococcineae	1
B1273	Peptococcus	3
B1273	Peptoniphilus	1
B1273	Peptoniphilus	1
B1273	Peptoniphilus	1
B1273	Peptoniphilus	1
B1273	Peptoniphilus	1
B1273	Peptoniphilus	2
B1273	Peptoniphilus	61
B1273	Prevotella	7
B1273	Staphylococcus	10
B1273	unidentified	1
B1273	unidentified	1
B1273	Varibaculum	1
B1273	Varibaculum	7
B1275	Actinobacteridae	1
B1275	Actinobacteridae	4
B1275	Actinobacteridae	6
B1275	Actinomycetaceae	1
B1275	Actinomycetales	1
B1275	Anaerococcus	1
B1275	Anaerococcus	1
B1275	Anaerococcus	1
B1275	Anaerococcus	1
B1275	Anaerococcus	1
B1275	Anaerococcus	1
B1275	Anaerococcus	14
B1275	Anaerococcus	4
B1275	Anaerococcus	5
B1275	Bacillales	1
B1275	Bacteroidetes	1
B1275	Bacteroidetes	1
B1275	Bacteroidetes	1
B1275	Bacteroidetes	70
B1275	Branhamella	1
B1275	Campylobacter	1
B1275	Campylobacter	4
B1275	Clostridia	1
B1275	Clostridia	1
B1275	Clostridiales	1
B1275	Clostridiales	1
B1275	Clostridiales	1
B1275	Clostridiales	1
B1275	Clostridiales	10
B1275	Clostridiales	2
B1275	Clostridiales	4
B1275	Clostridiales	7
B1275	Corynebacterium	2
B1275	Dialister	2
B1275	Finegoldia	10
B1275	Firmicutes	1
B1275	Firmicutes	1
B1275	Firmicutes	1
B1275	Firmicutes	1
B1275	Firmicutes	1
B1275	Firmicutes	3
B1275	Mobiluncus	8
B1275	Peptococcus	1
B1275	Peptoniphilus	3
B1275	Peptoniphilus	9
B1275	Porphyromonadaceae	1
B1275	Porphyromonadaceae	1
B1275	Porphyromonadaceae	52
B1275	Porphyromonas	1
B1275	Porphyromonas	1
B1275	Porphyromonas	1
B1275	Porphyromonas	11
B1275	Porphyromonas	2
B1275	Prevotella	8
B1275	Staphylococcus	5
B1275	Succiniclasticum	5
B1275	unidentified	1
B1275	unidentified	1
B1275	unidentified	1
B1275	unidentified	1
B1275	unidentified	1
B1275	unidentified	1
B1275	unidentified	1
B1275	unidentified	1
B1275	unidentified	1
B1275	unidentified	1
B1275	unidentified	1
B1275	unidentified	1
B1275	unidentified	1
B1275	unidentified	1
B1275	unidentified	1
B1275	unidentified	1
B1275	unidentified	10
B1275	unidentified	13
B1275	unidentified	19
B1275	unidentified	2
B1275	unidentified	2
B1275	unidentified	31
B1275	unidentified	4
B1275	unidentified	5
B1275	unidentified	6
B1275	Varibaculum	1
B1275	Varibaculum	7
B1275	Veillonellaceae	1
B1275	Veillonellaceae	1
B1278	Acidobacteriaceae	1
B1278	Actinobacteridae	1
B1278	Actinobacteridae	2
B1278	Actinobacteridae	2
B1278	Actinomycetales	1
B1278	Actinomycetales	1
B1278	Anaerococcus	1
B1278	Anaerococcus	1
B1278	Anaerococcus	1
B1278	Anaerococcus	1
B1278	Anaerococcus	1
B1278	Anaerococcus	1
B1278	Anaerococcus	1
B1278	Anaerococcus	1
B1278	Anaerococcus	2
B1278	Anaerococcus	31
B1278	Anaerococcus	65
B1278	Bacillales	1
B1278	Bacilli	2
B1278	Bacilli	2
B1278	Bacteroidetes	3
B1278	Bradyrhizobiaceae	1
B1278	Burkholderiales	1
B1278	Corynebacterineae	1
B1278	Corynebacterineae	1
B1278	Corynebacterineae	1
B1278	Corynebacterineae	1
B1278	Corynebacterineae	127
B1278	Corynebacterineae	2
B1278	Corynebacterium	1
B1278	Corynebacterium	1
B1278	Corynebacterium	1
B1278	Corynebacterium	2
B1278	Corynebacterium	3
B1278	Finegoldia	4
B1278	Lactobacillales	1
B1278	Novosphingobium	1
B1278	Pelomonas	1
B1278	Peptoniphilus	5
B1278	Phenylobacterium	1
B1278	Rhodospirillales	1
B1278	Staphylococcaceae	1
B1278	Staphylococcus	1
B1278	Staphylococcus	115
B1278	Streptococcus	1
B1278	unidentified	1
B1278	unidentified	2
B1280	Actinobacteridae	1
B1280	Actinobacteridae	1
B1280	Actinobacteridae	38
B1280	Actinomyces	1
B1280	Aerococcaceae	1
B1280	Aerococcaceae	1
B1280	Aerococcaceae	1
B1280	Aerococcaceae	27
B1280	Anaerococcus	1
B1280	Anaerococcus	1
B1280	Anaerococcus	1
B1280	Anaerococcus	1
B1280	Anaerococcus	1
B1280	Anaerococcus	1
B1280	Anaerococcus	1
B1280	Anaerococcus	3
B1280	Anaerococcus	3
B1280	Anaerococcus	32
B1280	Anaerococcus	4
B1280	Anaerococcus	8
B1280	Anaerococcus	9
B1280	Bacillales	1
B1280	Bacteroidetes	1
B1280	Bacteroidetes	3
B1280	Bradyrhizobiaceae	2
B1280	Clostridiales	1
B1280	Clostridiales	5
B1280	Corynebacterineae	38
B1280	Corynebacterium	1
B1280	Corynebacterium	128
B1280	Dermabacter	1
B1280	Dermabacter	13
B1280	Dermabacter	2
B1280	Faecalibacterium	1
B1280	Gammaproteobacteria	1
B1280	Methylophilaceae	2
B1280	Micrococcineae	1
B1280	Nevskia	1
B1280	Novosphingobium	4
B1280	Phenylobacterium	1
B1280	Rhodospirillales	2
B1280	Staphylococcaceae	1
B1280	Staphylococcus	49
B1280	Terrimonas	1
B1280	unidentified	2
B1280	Varibaculum	1
B1282	Actinobacteridae	1
B1282	Actinobacteridae	1
B1282	Actinomycetaceae	1
B1282	Actinomycetales	1
B1282	Actinomycetales	2
B1282	Aerococcaceae	1
B1282	Aerococcaceae	3
B1282	Anaerococcus	1
B1282	Anaerococcus	1
B1282	Anaerococcus	1
B1282	Anaerococcus	1
B1282	Anaerococcus	1
B1282	Anaerococcus	1
B1282	Anaerococcus	1
B1282	Anaerococcus	1
B1282	Anaerococcus	1
B1282	Anaerococcus	1
B1282	Anaerococcus	1
B1282	Anaerococcus	23
B1282	Anaerococcus	3
B1282	Anaerococcus	31
B1282	Anaerococcus	4
B1282	Anaerococcus	7
B1282	Anaerococcus	8
B1282	Bacillales	1
B1282	Bacillales	2
B1282	Bacillales	4
B1282	Bacillales	93
B1282	Bacilli	1
B1282	Bradyrhizobiaceae	1
B1282	Burkholderiales	1
B1282	Clostridiales	1
B1282	Clostridiales	1
B1282	Clostridiales	1
B1282	Clostridiales	1
B1282	Clostridiales	1
B1282	Clostridiales	1
B1282	Clostridiales	1
B1282	Clostridiales	2
B1282	Clostridiales	3
B1282	Clostridiales	3
B1282	Corynebacterineae	1
B1282	Corynebacterineae	1
B1282	Corynebacterineae	1
B1282	Corynebacterineae	1
B1282	Corynebacterineae	1
B1282	Corynebacterineae	2
B1282	Corynebacterineae	33
B1282	Corynebacterium	18
B1282	Corynebacterium	24
B1282	Corynebacterium	6
B1282	Dermabacter	2
B1282	Firmicutes	2
B1282	Nocardioidaceae	1
B1282	Novosphingobium	1
B1282	Peptoniphilus	2
B1282	Peptostreptococcaceae Incertae Sedis	1
B1282	Porphyromonas	1
B1282	Rhodobacteraceae	1
B1282	Rhodococcus	6
B1282	Rhodococcus	69
B1282	Staphylococcus	1
B1282	Staphylococcus	4
B1282	unidentified	1
B1282	unidentified	1
B1282	unidentified	1
B1282	unidentified	3
B1283	Actinobacteridae	1
B1283	Actinobacteridae	12
B1283	Actinomycetaceae	3
B1283	Actinomycetales	1
B1283	Anaerococcus	7
B1283	Bacteroidetes	1
B1283	Bacteroidetes	1
B1283	Bacteroidetes	1
B1283	Bacteroidetes	1
B1283	Bacteroidetes	1
B1283	Bacteroidetes	68
B1283	Campylobacter	3
B1283	Clostridiales	1
B1283	Clostridiales	1
B1283	Clostridiales	10
B1283	Clostridiales	2
B1283	Clostridiales	20
B1283	Clostridiales	3
B1283	Coriobacteriaceae	1
B1283	Corynebacterineae	6
B1283	Corynebacterium	1
B1283	Corynebacterium	2
B1283	Dermabacter	1
B1283	Dialister	2
B1283	Dialister	3
B1283	Finegoldia	2
B1283	Firmicutes	2
B1283	Firmicutes	2
B1283	Methylobacterium	1
B1283	Mobiluncus	1
B1283	Mobiluncus	15
B1283	Novosphingobium	1
B1283	Peptococcus	1
B1283	Peptoniphilus	1
B1283	Peptoniphilus	16
B1283	Porphyromonadaceae	8
B1283	Porphyromonas	1
B1283	Porphyromonas	1
B1283	Porphyromonas	29
B1283	Porphyromonas	5
B1283	Prevotella	2
B1283	Prevotella	4
B1283	Prevotellaceae	5
B1283	Rhodospirillales	1
B1283	Streptococcus	2
B1283	Terrimonas	1
B1283	unidentified	1
B1283	unidentified	1
B1283	unidentified	1
B1283	unidentified	1
B1283	unidentified	1
B1283	unidentified	1
B1283	unidentified	1
B1283	unidentified	1
B1283	unidentified	1
B1283	unidentified	1
B1283	unidentified	1
B1283	unidentified	1
B1283	unidentified	12
B1283	unidentified	19
B1283	unidentified	2
B1283	unidentified	2
B1283	unidentified	3
B1283	unidentified	34
B1283	unidentified	54
B1283	unidentified	7
B1283	Veillonellaceae	1
B1284	Actinobacteridae	1
B1284	Actinobacteridae	1
B1284	Actinobacteridae	15
B1284	Actinomyces	1
B1284	Actinomycetales	1
B1284	Actinomycetales	1
B1284	Aerococcaceae	1
B1284	Anaerococcus	1
B1284	Anaerococcus	1
B1284	Anaerococcus	1
B1284	Anaerococcus	2
B1284	Bacteroidetes	1
B1284	Bacteroidetes	1
B1284	Bacteroidetes	1
B1284	Bacteroidetes	2
B1284	Bacteroidetes	3
B1284	Bacteroidetes	43
B1284	Clostridiales	1
B1284	Clostridiales	1
B1284	Clostridiales	1
B1284	Clostridiales	1
B1284	Clostridiales	1
B1284	Clostridiales	14
B1284	Clostridiales	2
B1284	Corynebacterineae	6
B1284	Dialister	1
B1284	Dialister	11
B1284	Firmicutes	1
B1284	Firmicutes	1
B1284	Firmicutes	2
B1284	Hallella	1
B1284	Mobiluncus	1
B1284	Mobiluncus	24
B1284	Peptoniphilus	1
B1284	Peptoniphilus	2
B1284	Peptoniphilus	9
B1284	Porphyromonadaceae	1
B1284	Porphyromonadaceae	1
B1284	Porphyromonadaceae	1
B1284	Porphyromonadaceae	10
B1284	Porphyromonas	1
B1284	Porphyromonas	1
B1284	Porphyromonas	1
B1284	Porphyromonas	1
B1284	Porphyromonas	2
B1284	Porphyromonas	20
B1284	Porphyromonas	3
B1284	Prevotella	7
B1284	Prevotellaceae	1
B1284	Prevotellaceae	9
B1284	unidentified	1
B1284	unidentified	1
B1284	unidentified	1
B1284	unidentified	1
B1284	unidentified	1
B1284	unidentified	1
B1284	unidentified	1
B1284	unidentified	1
B1284	unidentified	1
B1284	unidentified	1
B1284	unidentified	1
B1284	unidentified	1
B1284	unidentified	1
B1284	unidentified	1
B1284	unidentified	1
B1284	unidentified	1
B1284	unidentified	1
B1284	unidentified	1
B1284	unidentified	1
B1284	unidentified	1
B1284	unidentified	1
B1284	unidentified	1
B1284	unidentified	1
B1284	unidentified	1
B1284	unidentified	1
B1284	unidentified	1
B1284	unidentified	1
B1284	unidentified	1
B1284	unidentified	17
B1284	unidentified	2
B1284	unidentified	2
B1284	unidentified	2
B1284	unidentified	28
B1284	unidentified	3
B1284	unidentified	3
B1284	unidentified	4
B1284	unidentified	4
B1284	unidentified	7
B1284	unidentified	81
B1284	Varibaculum	1
B1284	Varibaculum	1
B1285	Actinobacteridae	1
B1285	Actinobacteridae	1
B1285	Actinobacteridae	2
B1285	Actinobacteridae	3
B1285	Actinomycetales	1
B1285	Actinomycetales	1
B1285	Alcaligenaceae	1
B1285	Anaerococcus	1
B1285	Anaerococcus	1
B1285	Anaerococcus	1
B1285	Anaerococcus	1
B1285	Anaerococcus	1
B1285	Anaerococcus	1
B1285	Anaerococcus	1
B1285	Anaerococcus	1
B1285	Anaerococcus	1
B1285	Anaerococcus	1
B1285	Anaerococcus	1
B1285	Anaerococcus	1
B1285	Anaerococcus	19
B1285	Anaerococcus	2
B1285	Anaerococcus	2
B1285	Anaerococcus	2
B1285	Anaerococcus	63
B1285	Anaerococcus	8
B1285	Anaerococcus	82
B1285	Branhamella	1
B1285	Branhamella	2
B1285	Branhamella	32
B1285	Chloroplast	1
B1285	Chloroplast	1
B1285	Clostridia	1
B1285	Clostridia	1
B1285	Clostridiales	1
B1285	Clostridiales	28
B1285	Corynebacterineae	1
B1285	Corynebacterineae	3
B1285	Corynebacterineae	75
B1285	Corynebacterium	1
B1285	Corynebacterium	20
B1285	Finegoldia	1
B1285	Finegoldia	8
B1285	Lactobacillaceae	1
B1285	Moraxellaceae	1
B1285	Peptoniphilus	1
B1285	Peptoniphilus	1
B1285	Peptoniphilus	1
B1285	Peptoniphilus	7
B1285	Porphyromonadaceae	1
B1285	Prevotella	1
B1285	Staphylococcus	5
B1285	Streptococcus	1
B1285	unidentified	1
B1285	unidentified	1
B1285	unidentified	1
B1286	Actinobacteridae	3
B1286	Actinomycetaceae	2
B1286	Actinomycetales	1
B1286	Actinomycetales	1
B1286	Anaerococcus	1
B1286	Anaerococcus	1
B1286	Anaerococcus	1
B1286	Anaerococcus	1
B1286	Anaerococcus	1
B1286	Anaerococcus	1
B1286	Anaerococcus	1
B1286	Anaerococcus	11
B1286	Anaerococcus	19
B1286	Anaerococcus	2
B1286	Campylobacter	1
B1286	Campylobacter	1
B1286	Campylobacter	34
B1286	Campylobacterales	1
B1286	Campylobacterales	2
B1286	Clostridia	1
B1286	Clostridiales	1
B1286	Clostridiales	1
B1286	Clostridiales	1
B1286	Clostridiales	1
B1286	Clostridiales	1
B1286	Clostridiales	1
B1286	Clostridiales	1
B1286	Clostridiales	1
B1286	Clostridiales	2
B1286	Clostridiales	68
B1286	Corynebacterineae	18
B1286	Corynebacterineae	6
B1286	Corynebacterium	1
B1286	Corynebacterium	1
B1286	Dermabacter	3
B1286	Dialister	1
B1286	Finegoldia	1
B1286	Finegoldia	1
B1286	Finegoldia	1
B1286	Finegoldia	1
B1286	Finegoldia	1
B1286	Finegoldia	1
B1286	Finegoldia	1
B1286	Finegoldia	28
B1286	Mobiluncus	2
B1286	Peptoniphilus	1
B1286	Peptoniphilus	1
B1286	Peptoniphilus	1
B1286	Peptoniphilus	1
B1286	Peptoniphilus	1
B1286	Peptoniphilus	1
B1286	Peptoniphilus	1
B1286	Peptoniphilus	1
B1286	Peptoniphilus	2
B1286	Peptoniphilus	3
B1286	Peptoniphilus	4
B1286	Peptoniphilus	96
B1286	Prevotella	1
B1286	Prevotella	43
B1286	Prevotellaceae	1
B1286	Ralstonia	1
B1286	unidentified	1
B1286	unidentified	1
B1286	unidentified	1
B1286	Varibaculum	1
B1286	Veillonellaceae	6
B1288	Actinobacteridae	1
B1288	Actinobacteridae	3
B1288	Actinobacteridae	3
B1288	Actinomycetaceae	1
B1288	Actinomycetales	1
B1288	Actinomycetales	1
B1288	Actinomycetales	1
B1288	Actinomycetales	1
B1288	Actinomycetales	1
B1288	Actinomycetales	1
B1288	Aerococcaceae	1
B1288	Aerococcaceae	1
B1288	Aerococcaceae	11
B1288	Anaerococcus	1
B1288	Anaerococcus	1
B1288	Anaerococcus	1
B1288	Anaerococcus	1
B1288	Anaerococcus	1
B1288	Anaerococcus	1
B1288	Anaerococcus	1
B1288	Anaerococcus	1
B1288	Anaerococcus	1
B1288	Anaerococcus	1
B1288	Anaerococcus	1
B1288	Anaerococcus	1
B1288	Anaerococcus	1
B1288	Anaerococcus	1
B1288	Anaerococcus	1
B1288	Anaerococcus	1
B1288	Anaerococcus	1
B1288	Anaerococcus	1
B1288	Anaerococcus	11
B1288	Anaerococcus	12
B1288	Anaerococcus	2
B1288	Anaerococcus	2
B1288	Anaerococcus	2
B1288	Anaerococcus	2
B1288	Anaerococcus	2
B1288	Anaerococcus	2
B1288	Anaerococcus	3
B1288	Anaerococcus	3
B1288	Anaerococcus	4
B1288	Anaerococcus	59
B1288	Arcanobacterium	1
B1288	Bacilli	1
B1288	Bacteroidetes	3
B1288	Brevibacterium	2
B1288	Campylobacter	1
B1288	Clostridia	1
B1288	Clostridiales	1
B1288	Clostridiales	1
B1288	Clostridiales	1
B1288	Clostridiales	1
B1288	Clostridiales	1
B1288	Clostridiales	1
B1288	Clostridiales	1
B1288	Clostridiales	1
B1288	Clostridiales	1
B1288	Clostridiales	1
B1288	Clostridiales	1
B1288	Clostridiales	13
B1288	Clostridiales	14
B1288	Clostridiales	2
B1288	Clostridiales	2
B1288	Clostridiales	3
B1288	Clostridiales	44
B1288	Clostridiales	6
B1288	Corynebacterineae	1
B1288	Corynebacterineae	2
B1288	Corynebacterineae	2
B1288	Corynebacterineae	22
B1288	Corynebacterium	20
B1288	Dialister	1
B1288	Finegoldia	1
B1288	Firmicutes	1
B1288	Firmicutes	5
B1288	Gallicola	1
B1288	Mobiluncus	1
B1288	Peptococcus	1
B1288	Peptococcus	2
B1288	Peptoniphilus	1
B1288	Peptoniphilus	1
B1288	Peptoniphilus	1
B1288	Peptoniphilus	1
B1288	Peptoniphilus	2
B1288	Peptoniphilus	27
B1288	Peptoniphilus	7
B1288	Staphylococcus	2
B1288	unidentified	1
B1288	unidentified	1
B1288	unidentified	1
B1288	unidentified	1
B1288	unidentified	1
B1288	unidentified	1
B1288	unidentified	1
B1288	unidentified	1
B1288	unidentified	1
B1288	unidentified	1
B1288	unidentified	1
B1288	unidentified	11
B1288	unidentified	2
B1288	unidentified	4
B1288	unidentified	8
B1288	Varibaculum	1
B1288	Varibaculum	1
B1288	Varibaculum	5
B1288	Veillonellaceae	2
B1289	Actinobacteridae	1
B1289	Actinobacteridae	1
B1289	Actinobacteridae	12
B1289	Actinobaculum	1
B1289	Actinomyces	2
B1289	Actinomycetaceae	1
B1289	Actinomycetales	1
B1289	Actinomycetales	1
B1289	Actinomycetales	1
B1289	Actinomycetales	1
B1289	Actinomycetales	1
B1289	Anaerococcus	1
B1289	Bacteroidales	1
B1289	Bacteroidetes	1
B1289	Bacteroidetes	1
B1289	Bacteroidetes	14
B1289	Bacteroidetes	2
B1289	Campylobacter	3
B1289	Clostridia	1
B1289	Clostridia	1
B1289	Clostridia	15
B1289	Clostridiales	1
B1289	Clostridiales	1
B1289	Clostridiales	1
B1289	Clostridiales	1
B1289	Clostridiales	1
B1289	Clostridiales	1
B1289	Clostridiales	1
B1289	Clostridiales	1
B1289	Clostridiales	1
B1289	Clostridiales	1
B1289	Clostridiales	1
B1289	Clostridiales	2
B1289	Clostridiales	29
B1289	Clostridiales	4
B1289	Clostridiales	4
B1289	Dialister	1
B1289	Dialister	4
B1289	Firmicutes	1
B1289	Firmicutes	1
B1289	Firmicutes	1
B1289	Methanobrevibacter	11
B1289	Mobiluncus	9
B1289	Peptococcus	1
B1289	Peptococcus	1
B1289	Peptococcus	1
B1289	Peptococcus	1
B1289	Peptococcus	1
B1289	Peptococcus	1
B1289	Peptococcus	1
B1289	Peptococcus	1
B1289	Peptococcus	2
B1289	Peptococcus	3
B1289	Peptococcus	32
B1289	Peptoniphilus	1
B1289	Peptoniphilus	1
B1289	Peptoniphilus	1
B1289	Peptoniphilus	2
B1289	Peptoniphilus	2
B1289	Peptoniphilus	20
B1289	Peptoniphilus	4
B1289	Porphyromonadaceae	18
B1289	Porphyromonas	1
B1289	Porphyromonas	3
B1289	Prevotella	4
B1289	unidentified	1
B1289	unidentified	1
B1289	unidentified	1
B1289	unidentified	1
B1289	unidentified	1
B1289	unidentified	1
B1289	unidentified	1
B1289	unidentified	1
B1289	unidentified	1
B1289	unidentified	1
B1289	unidentified	1
B1289	unidentified	1
B1289	unidentified	1
B1289	unidentified	1
B1289	unidentified	1
B1289	unidentified	1
B1289	unidentified	1
B1289	unidentified	1
B1289	unidentified	1
B1289	unidentified	1
B1289	unidentified	1
B1289	unidentified	1
B1289	unidentified	1
B1289	unidentified	1
B1289	unidentified	1
B1289	unidentified	1
B1289	unidentified	1
B1289	unidentified	18
B1289	unidentified	2
B1289	unidentified	2
B1289	unidentified	2
B1289	unidentified	2
B1289	unidentified	2
B1289	unidentified	2
B1289	unidentified	26
B1289	unidentified	3
B1289	unidentified	30
B1289	unidentified	41
B1291	Actinobacteridae	1
B1291	Actinobacteridae	1
B1291	Actinobacteridae	1
B1291	Actinobacteridae	13
B1291	Actinomyces	1
B1291	Actinomycetales	1
B1291	Actinomycetales	1
B1291	Aerococcaceae	1
B1291	Anaerococcus	1
B1291	Anaerococcus	1
B1291	Anaerococcus	1
B1291	Anaerococcus	1
B1291	Anaerococcus	1
B1291	Anaerococcus	1
B1291	Anaerococcus	10
B1291	Anaerococcus	2
B1291	Anaerococcus	2
B1291	Anaerococcus	2
B1291	Arcanobacterium	1
B1291	Bacteroidetes	1
B1291	Bacteroidetes	1
B1291	Bacteroidetes	1
B1291	Bacteroidetes	2
B1291	Bacteroidetes	59
B1291	Campylobacter	1
B1291	Campylobacter	3
B1291	Clostridiales	1
B1291	Clostridiales	12
B1291	Clostridiales	2
B1291	Clostridiales	3
B1291	Clostridiales	3
B1291	Clostridiales	4
B1291	Corynebacterineae	2
B1291	Corynebacterineae	4
B1291	Corynebacterium	1
B1291	Corynebacterium	3
B1291	Dermabacter	1
B1291	Dialister	4
B1291	Finegoldia	2
B1291	Firmicutes	1
B1291	Firmicutes	1
B1291	Firmicutes	3
B1291	Fusobacterium	1
B1291	Hallella	1
B1291	Lachnospiraceae	2
B1291	Lactobacillales	2
B1291	Millisia	1
B1291	Mobiluncus	1
B1291	Mobiluncus	29
B1291	Peptoniphilus	2
B1291	Peptoniphilus	2
B1291	Peptoniphilus	5
B1291	Porphyromonadaceae	8
B1291	Porphyromonas	1
B1291	Porphyromonas	19
B1291	Porphyromonas	3
B1291	Porphyromonas	8
B1291	Prevotella	1
B1291	Prevotella	1
B1291	Prevotella	1
B1291	Prevotella	1
B1291	Prevotella	3
B1291	Prevotella	3
B1291	Prevotellaceae	1
B1291	Prevotellaceae	4
B1291	Staphylococcus	3
B1291	unidentified	1
B1291	unidentified	1
B1291	unidentified	1
B1291	unidentified	1
B1291	unidentified	1
B1291	unidentified	1
B1291	unidentified	1
B1291	unidentified	1
B1291	unidentified	1
B1291	unidentified	1
B1291	unidentified	1
B1291	unidentified	1
B1291	unidentified	1
B1291	unidentified	1
B1291	unidentified	1
B1291	unidentified	1
B1291	unidentified	1
B1291	unidentified	15
B1291	unidentified	2
B1291	unidentified	2
B1291	unidentified	29
B1291	unidentified	3
B1291	unidentified	3
B1291	unidentified	3
B1291	unidentified	3
B1291	unidentified	4
B1291	unidentified	4
B1291	unidentified	54
B1292	Actinobacteria	1
B1292	Actinobacteridae	1
B1292	Actinobacteridae	11
B1292	Actinobacteridae	2
B1292	Actinomycetaceae	1
B1292	Actinomycetales	1
B1292	Aerococcaceae	2
B1292	Anaerococcus	1
B1292	Anaerococcus	1
B1292	Anaerococcus	16
B1292	Anaerococcus	2
B1292	Anaerococcus	2
B1292	Anaerococcus	3
B1292	Anaerococcus	3
B1292	Anaerococcus	5
B1292	Bacilli	1
B1292	Bacteroidetes	1
B1292	Bacteroidetes	3
B1292	Bacteroidetes	48
B1292	Burkholderiales	1
B1292	Caenibacterium	1
B1292	Campylobacter	2
B1292	Chloroplast	1
B1292	Clostridiales	1
B1292	Clostridiales	1
B1292	Clostridiales	1
B1292	Clostridiales	13
B1292	Clostridiales	14
B1292	Clostridiales	2
B1292	Clostridiales	2
B1292	Clostridiales	4
B1292	Corynebacterineae	14
B1292	Corynebacterineae	7
B1292	Corynebacterium	1
B1292	Corynebacterium	12
B1292	Dermabacter	1
B1292	Dialister	3
B1292	Finegoldia	6
B1292	Firmicutes	1
B1292	Firmicutes	1
B1292	Lactobacillales	1
B1292	Lactobacillales	1
B1292	Lactobacillales	2
B1292	Mobiluncus	7
B1292	Peptococcus	1
B1292	Peptoniphilus	1
B1292	Peptoniphilus	1
B1292	Peptoniphilus	18
B1292	Porphyromonadaceae	13
B1292	Porphyromonas	1
B1292	Porphyromonas	1
B1292	Porphyromonas	1
B1292	Porphyromonas	1
B1292	Porphyromonas	1
B1292	Porphyromonas	4
B1292	Porphyromonas	8
B1292	Prevotella	1
B1292	Prevotella	2
B1292	Prevotella	4
B1292	Prevotellaceae	3
B1292	Ruminococcaceae	2
B1292	Sphingobacterium	1
B1292	Staphylococcus	9
B1292	unidentified	1
B1292	unidentified	1
B1292	unidentified	1
B1292	unidentified	1
B1292	unidentified	1
B1292	unidentified	1
B1292	unidentified	1
B1292	unidentified	14
B1292	unidentified	2
B1292	unidentified	2
B1292	unidentified	2
B1292	unidentified	3
B1292	unidentified	3
B1292	unidentified	30
B1292	unidentified	45
B1292	unidentified	7
B1292	Varibaculum	2
B1292	Veillonellaceae	4
B1292	Xanthomonadaceae	1
B1293	Abiotrophia	1
B1293	Acidobacteriaceae	1
B1293	Acinetobacter	1
B1293	Actinobacteridae	1
B1293	Actinobacteridae	1
B1293	Actinobacteridae	9
[truncated: 1,968 more rows]

## Sheet: DATA table
lowest RDP taxonomic level	#OTU ID	B1234	B1235	B1236	B1237	B1242	B1243	B1246	B1253	B1254	B1258	B1259	B1260	B1264	B1265	B1273	B1275	B1278	B1280	B1282	B1283	B1284	B1285	B1286	B1288	B1289	B1291	B1292	B1293	B1294	B1295	B1296	B1298	B1308	B1310	B1374	B940	B941	B944	B945	B946	B947	B948	B950	B952	B953	B954	B955	B956
Halobacteriaceae	2151	0	0	0	0	0	0	0	0	0	0	0	0	0	0	0	0	0	0	0	0	0	0	0	0	0	0	0	0	0	0	0	0	0	0	0	0	0	0	0	0	0	0	0	0	0	0	0	0
Halobacteriaceae	670	0	0	0	0	0	0	0	0	0	0	0	0	0	0	0	0	0	0	0	0	0	0	0	0	0	0	0	0	0	0	0	0	0	0	0	0	0	0	0	0	0	0	0	0	0	0	0	0
Halobacteriaceae	1938	0	0	0	0	0	0	0	0	0	0	0	0	0	0	0	0	0	0	0	0	0	0	0	0	0	0	0	0	0	1	0	0	0	0	0	0	0	0	0	0	0	0	0	0	0	0	0	0
Methanobrevibacter	347	0	0	0	0	0	0	0	0	0	0	0	0	0	3	0	0	0	0	0	0	0	0	0	0	11	0	0	0	0	1	0	9	0	2	0	0	0	0	0	0	0	0	0	0	0	0	0	0
Acidobacteriaceae	1192	0	0	0	0	0	0	0	0	1	1	0	5	1	1	0	0	0	0	0	0	0	0	0	0	0	0	0	0	0	0	0	0	0	0	0	0	0	0	0	0	0	0	0	0	0	0	0	0
Acidobacteriaceae	1540	0	0	0	0	0	0	0	0	0	0	0	0	0	0	0	0	0	0	0	0	0	0	0	0	0	0	0	1	0	0	0	0	0	0	0	0	0	0	0	0	0	0	0	0	0	0	0	0
Acidobacteriaceae	505	0	0	0	0	0	0	0	0	0	0	0	0	0	0	0	0	1	0	0	0	0	0	0	0	0	0	0	0	0	0	0	0	0	0	0	0	0	0	0	0	0	0	0	0	0	0	0	0
Acidobacteriaceae	1718	0	0	0	0	0	0	0	0	0	0	0	1	0	0	0	0	0	0	0	0	0	0	0	0	0	0	0	0	0	0	0	0	0	0	0	0	0	0	0	0	0	0	0	0	0	0	0	0
Acidobacteriaceae	1860	0	0	0	0	0	0	0	0	1	0	0	0	0	0	0	0	0	0	0	0	0	0	0	0	0	0	0	0	0	0	0	0	0	0	0	0	0	0	0	0	0	0	0	0	0	0	0	0
Acidobacteriaceae	38	0	0	0	0	0	0	0	0	0	0	0	0	0	0	0	0	0	0	0	0	0	0	0	0	0	0	0	0	0	0	0	0	0	0	0	0	0	0	0	0	0	0	0	0	0	0	0	0
Actinobaculum	1895	0	0	0	0	0	0	0	0	0	0	0	0	0	0	0	0	0	0	0	0	0	0	0	0	1	0	0	0	0	0	0	1	0	0	0	0	0	0	0	0	0	0	0	0	0	0	0	0
Actinomyces	520	7	0	13	0	0	0	4	0	0	0	0	0	0	0	1	0	0	1	0	0	1	0	0	0	2	1	0	0	0	1	0	0	2	2	4	1	0	0	0	1	0	0	0	0	0	0	0	1
Actinomyces	1809	0	0	0	0	0	0	0	0	0	0	0	0	0	0	0	0	0	0	0	0	0	0	0	0	0	0	0	0	0	0	20	1	7	0	0	0	0	0	0	0	0	0	0	0	0	0	0	0
Actinomyces	616	0	0	0	0	0	0	0	0	0	0	0	0	0	0	0	0	0	0	0	0	0	0	0	0	0	0	0	0	0	0	0	0	0	0	0	0	0	0	0	0	0	0	0	0	0	0	0	0
Actinomyces	474	0	0	1	0	0	0	0	0	0	0	0	0	0	0	0	0	0	0	0	0	0	0	0	0	0	0	0	0	0	0	0	0	0	0	0	0	0	0	0	0	0	0	0	0	0	0	0	0
Actinomyces	462	0	0	0	0	0	0	0	0	0	0	0	0	0	0	0	0	0	0	0	0	0	0	0	0	0	0	0	0	0	0	0	0	0	0	0	0	0	0	0	0	0	0	0	0	0	0	1	0
Actinomyces	1908	0	0	0	0	0	0	0	0	0	0	0	0	0	0	0	0	0	0	0	0	0	0	0	0	0	0	0	0	0	0	0	0	0	0	0	0	0	0	0	0	0	0	0	0	0	0	0	0
Actinomyces	2307	0	0	0	0	0	0	1	0	0	0	0	0	0	0	0	0	0	0	0	0	0	0	0	0	0	0	0	0	0	0	0	0	0	0	0	0	0	0	0	0	0	0	0	0	0	0	0	0
Arcanobacterium	777	0	0	0	0	0	1	0	0	0	0	0	0	0	0	0	0	0	0	0	0	0	0	0	1	0	1	0	0	0	0	0	0	0	0	0	0	0	0	0	0	0	0	0	0	0	0	0	0
Mobiluncus	297	29	3	2	1	1	0	0	3	0	2	0	1	9	18	0	8	0	0	0	15	24	0	2	1	9	29	7	17	0	1	0	8	1	8	0	1	0	0	0	3	0	1	0	0	0	0	0	0
Mobiluncus	369	0	0	0	0	0	0	0	1	0	0	0	0	0	0	0	0	0	0	0	0	0	0	0	0	0	0	0	0	0	0	0	0	0	1	0	0	0	0	0	0	0	0	0	0	0	0	0	0
Mobiluncus	439	0	0	0	0	0	0	0	0	0	0	0	0	0	0	0	0	0	0	0	1	0	0	0	0	0	0	0	0	0	0	0	0	0	0	0	0	0	0	0	0	0	0	0	0	0	0	0	0
Mobiluncus	2024	0	0	0	0	0	0	0	0	0	0	0	0	0	0	0	0	0	0	0	0	1	0	0	0	0	0	0	0	0	0	0	0	0	0	0	0	0	0	0	0	0	0	0	0	0	0	0	0
Mobiluncus	2044	0	0	0	0	0	0	0	0	0	0	0	0	0	0	0	0	0	0	0	0	0	0	0	0	0	1	0	0	0	0	0	0	0	0	0	0	0	0	0	0	0	0	0	0	0	0	0	0
Varibaculum	245	3	1	0	0	0	0	7	0	0	3	0	0	0	1	7	7	0	0	0	0	1	0	1	5	0	0	2	2	0	0	1	0	0	0	3	12	3	0	0	0	0	0	0	0	0	0	0	5
Varibaculum	257	0	0	0	0	0	0	0	0	0	0	0	0	0	0	1	0	0	1	0	0	0	0	0	0	0	0	0	0	0	0	0	0	0	0	0	0	0	0	0	0	0	0	0	0	0	0	0	0
Varibaculum	782	0	0	0	0	0	0	0	0	0	0	0	0	0	0	0	1	0	0	0	0	0	0	0	1	0	0	0	0	0	0	0	0	0	0	0	0	0	0	0	0	0	0	0	0	0	0	0	0
Varibaculum	78	0	0	0	0	0	0	0	0	0	0	0	0	0	0	0	0	0	0	0	0	0	0	0	0	0	0	0	0	0	0	0	0	0	0	0	1	0	0	0	0	0	0	0	0	0	0	0	0
Varibaculum	91	0	0	0	0	0	0	0	0	0	0	0	0	0	0	0	0	0	0	0	0	0	0	0	1	0	0	0	0	0	0	0	0	0	0	0	0	0	0	0	0	0	0	0	0	0	0	0	0
Varibaculum	534	0	0	0	1	0	0	0	0	0	0	0	0	0	0	0	0	0	0	0	0	0	0	0	0	0	0	0	0	0	0	0	0	0	0	0	0	0	0	0	0	0	0	0	0	0	0	0	0
Varibaculum	1106	0	0	0	0	0	0	0	0	0	0	0	0	0	0	0	0	0	0	0	0	0	0	0	0	0	0	0	0	0	0	0	0	0	0	0	0	0	0	0	0	0	0	0	0	0	0	0	0
Varibaculum	1204	0	0	0	0	0	0	0	0	0	0	0	0	0	0	0	0	0	0	0	0	1	0	0	0	0	0	0	0	0	0	0	0	0	0	0	0	0	0	0	0	0	0	0	0	0	0	0	0
Varibaculum	1247	0	0	0	0	0	0	1	0	0	0	0	0	0	0	0	0	0	0	0	0	0	0	0	0	0	0	0	0	0	0	0	0	0	0	0	0	0	0	0	0	0	0	0	0	0	0	0	0
Varibaculum	2138	0	0	0	0	0	0	0	0	0	0	0	0	0	0	0	0	0	0	0	0	0	0	0	0	0	0	0	0	0	0	0	0	0	0	0	0	0	0	0	0	0	0	0	0	0	0	0	0
Actinomycetaceae	869	0	0	0	0	0	0	0	0	0	0	0	1	0	3	0	1	0	0	1	3	0	0	2	1	1	0	1	0	2	0	0	5	0	3	0	1	0	0	0	0	0	4	0	0	0	0	1	2
Corynebacterium	1986	2	36	14	6	92	38	5	21	6	19	19	29	4	7	21	2	3	128	24	2	0	0	1	20	0	3	12	9	26	6	9	2	36	19	36	2	64	7	87	1	36	4	9	4	33	136	24	20
Corynebacterium	2097	0	2	24	0	0	3	0	12	155	2	0	0	0	0	0	0	1	0	6	0	0	20	0	0	0	1	0	1	0	0	0	0	0	0	0	0	0	15	12	0	0	17	0	43	13	1	22	3
Corynebacterium	178	0	0	0	0	7	0	0	1	0	2	0	0	1	1	5	0	1	0	18	0	0	0	0	0	0	0	0	0	2	0	0	0	0	0	5	0	0	0	0	0	0	0	0	18	0	0	0	0
Corynebacterium	1120	0	0	0	0	0	0	0	0	26	0	0	0	0	0	0	0	0	0	0	0	0	0	0	0	0	0	0	0	0	0	0	0	0	0	0	0	0	4	0	0	0	0	0	0	0	0	0	0
Corynebacterium	1017	1	2	1	0	5	1	0	0	0	0	1	0	1	0	0	0	0	0	0	0	0	0	0	0	0	0	0	0	1	0	0	0	0	0	1	0	2	1	2	0	0	0	0	0	1	4	1	0
Corynebacterium	124	0	0	0	0	0	0	0	0	0	0	0	0	0	0	0	0	0	0	0	0	0	0	0	0	0	0	0	0	0	0	0	0	0	0	0	0	0	0	0	0	0	0	0	0	0	0	0	0
Corynebacterium	907	0	0	0	0	1	0	0	0	0	0	0	0	0	0	0	0	0	0	0	0	0	0	0	0	0	0	1	0	0	0	0	0	0	0	0	0	0	0	0	0	0	4	0	0	0	0	0	0
Corynebacterium	219	0	0	0	0	0	0	0	1	0	0	0	0	0	0	0	0	2	1	0	1	0	0	0	0	0	0	0	0	0	0	0	0	0	0	0	0	0	1	0	0	0	0	0	0	0	0	0	0
Corynebacterium	11	0	0	0	0	0	0	0	0	0	0	3	0	0	0	0	0	0	0	0	0	0	0	0	0	0	0	0	0	0	0	0	0	0	0	0	0	0	0	0	0	0	0	0	0	0	0	0	0
Corynebacterium	336	0	0	0	0	0	0	0	0	0	0	0	0	0	0	0	0	1	0	0	0	0	1	0	0	0	0	0	0	0	0	0	0	0	0	0	0	0	1	0	0	0	0	0	0	0	1	0	0
Corynebacterium	812	0	0	0	0	0	0	0	0	0	0	0	0	0	0	0	0	0	0	0	0	0	0	1	0	0	0	0	0	0	0	0	0	0	0	0	0	0	0	0	0	0	0	0	0	1	1	0	0
Corynebacterium	1421	0	0	0	0	0	1	0	0	0	0	0	0	0	0	0	0	0	0	0	0	0	0	0	0	0	0	0	0	0	0	0	0	0	0	0	0	0	0	0	0	0	0	0	0	0	1	0	0
Corynebacterium	1322	0	0	0	0	0	1	0	0	0	0	0	0	0	0	0	0	0	0	0	0	0	0	0	0	0	0	0	0	0	0	0	0	0	0	0	0	0	1	0	0	0	0	0	0	0	0	1	0
Corynebacterium	2319	0	0	0	0	0	0	0	0	2	0	0	0	0	0	0	0	0	0	0	0	0	0	0	0	0	0	0	0	0	0	0	0	0	0	0	0	0	0	0	0	0	0	0	0	0	0	0	0
Corynebacterium	1090	0	0	0	0	0	0	0	0	0	0	0	0	0	0	0	0	0	0	0	0	0	0	0	0	0	0	0	0	0	0	0	0	0	0	0	0	0	0	0	0	0	0	0	0	0	0	0	0
Corynebacterium	2191	0	0	0	0	0	0	0	0	0	0	0	0	0	0	0	0	0	0	0	0	0	0	0	0	0	0	0	0	0	0	0	0	0	0	0	0	0	0	0	0	0	1	0	0	1	0	0	0
Corynebacterium	264	0	0	0	0	0	0	0	0	0	0	0	0	0	0	0	0	0	0	0	0	0	0	0	0	0	0	0	0	0	0	0	0	0	0	0	0	0	0	0	0	0	0	0	0	0	0	0	0
Corynebacterium	774	0	0	0	0	0	0	0	0	0	0	0	0	0	0	0	0	0	0	0	0	0	0	0	0	0	0	0	0	0	0	0	0	0	0	0	0	0	0	0	0	0	0	0	0	0	0	0	0
Corynebacterium	925	0	0	0	0	0	0	0	0	1	0	0	0	0	0	0	0	0	0	0	0	0	0	0	0	0	0	0	0	0	0	0	0	0	0	0	0	0	0	0	0	0	0	0	0	0	0	0	0
Corynebacterium	1186	0	0	0	0	0	0	0	0	0	0	0	0	0	0	0	0	0	0	0	0	0	0	0	0	0	0	0	0	0	0	0	0	0	0	0	0	0	0	0	0	0	0	0	0	0	0	0	0
Corynebacterium	1896	0	0	0	0	1	0	0	0	0	0	0	0	0	0	0	0	0	0	0	0	0	0	0	0	0	0	0	0	0	0	0	0	0	0	0	0	0	0	0	0	0	0	0	0	0	0	0	0
Millisia	882	0	0	0	0	0	0	0	0	0	0	0	0	0	0	0	0	0	0	0	0	0	0	0	0	0	0	0	0	0	0	0	0	0	0	0	0	0	0	0	0	0	0	0	0	0	0	0	0
Millisia	1630	0	0	0	0	0	0	0	0	0	0	0	0	0	0	0	0	0	0	0	0	0	0	0	0	0	1	0	0	0	0	0	0	0	0	0	0	0	0	0	0	0	0	0	0	0	0	0	0
Gordoniaceae	1018	0	0	0	0	0	0	0	0	0	0	2	0	0	0	0	0	0	0	0	0	0	0	0	0	0	0	0	0	0	0	0	0	0	0	0	0	0	0	0	0	0	0	0	0	0	0	0	0
Mycobacterium	2199	0	0	0	0	0	1	0	0	0	0	0	0	0	0	0	0	0	0	0	0	0	0	0	0	0	0	0	0	0	0	0	0	0	0	0	0	0	0	0	0	0	0	0	0	0	0	0	0
Rhodococcus	2222	0	0	0	0	0	0	0	0	0	0	0	0	0	0	0	0	0	0	69	0	0	0	0	0	0	0	0	0	0	0	0	0	0	0	0	0	0	0	0	0	0	0	0	0	0	0	0	0
Rhodococcus	1727	0	0	0	0	0	0	0	0	0	0	0	0	0	0	0	0	0	0	6	0	0	0	0	0	0	0	0	0	0	0	0	0	0	0	0	0	0	0	0	0	0	0	0	0	0	0	0	0
Rhodococcus	1357	0	0	0	0	0	1	0	0	0	0	0	0	0	0	0	0	0	0	0	0	0	0	0	0	0	0	0	0	0	0	0	0	0	0	0	0	0	0	0	0	0	0	0	0	0	0	0	0
Rhodococcus	2272	0	0	0	0	0	0	0	0	0	0	0	0	0	0	0	0	0	0	0	0	0	0	0	0	0	0	0	0	0	0	0	0	1	0	0	0	0	0	0	0	0	0	0	0	0	0	0	0
Williamsia	833	0	0	0	0	0	0	0	0	0	0	0	0	0	0	0	0	0	0	0	0	0	0	0	0	0	0	0	0	0	0	0	0	0	0	0	0	0	0	0	0	0	0	0	0	0	0	0	0
Corynebacterineae	197	1	14	84	5	4	34	0	40	53	15	2	4	1	0	0	0	127	38	0	0	0	75	18	1	0	2	14	4	14	2	0	20	0	2	0	0	7	238	43	0	10	81	58	93	167	114	76	18
Corynebacterineae	822	0	4	1	2	4	2	0	3	0	14	1	0	19	22	59	0	1	0	33	6	6	0	6	2	0	4	7	12	57	9	0	2	0	24	85	0	1	2	4	1	4	72	0	23	1	0	2	14
Corynebacterineae	1223	0	0	0	0	0	0	0	0	0	0	0	0	0	0	0	0	1	0	0	0	0	0	0	0	0	0	0	0	2	0	0	0	0	0	0	0	0	0	0	0	0	0	2	0	0	0	0	1
Corynebacterineae	1843	0	0	0	0	0	0	1	0	0	0	0	0	0	0	0	0	0	0	0	0	0	0	0	22	0	0	0	0	0	0	0	1	0	0	0	0	0	0	0	0	0	0	0	0	0	0	0	0
Corynebacterineae	839	0	0	2	0	0	0	0	2	0	0	0	0	0	0	0	0	2	0	0	0	0	3	0	0	0	0	0	0	0	0	0	0	0	0	0	0	0	0	3	0	0	0	0	2	2	1	2	0
Corynebacterineae	1515	0	0	1	0	0	0	0	0	0	0	0	0	0	0	0	0	0	0	2	0	0	0	0	0	0	0	0	0	0	0	0	0	0	0	0	0	0	0	2	0	0	1	0	7	2	0	1	0
Corynebacterineae	1491	0	0	0	0	0	0	0	0	0	0	0	0	0	0	2	0	0	0	0	0	0	0	0	0	0	0	0	0	0	0	0	0	0	0	1	0	0	0	0	0	1	1	0	1	0	0	0	1
Corynebacterineae	1553	0	0	2	0	0	0	0	0	0	0	0	0	0	0	0	0	0	0	0	0	0	1	0	0	0	0	0	0	0	0	0	0	0	0	0	0	0	0	1	0	0	0	0	2	1	1	0	0
Corynebacterineae	372	1	0	0	0	1	0	0	0	0	0	0	0	0	0	0	0	1	0	0	0	0	0	0	0	0	0	0	0	1	0	0	0	1	0	0	0	0	0	1	0	0	0	0	0	0	1	0	0
Corynebacterineae	2209	0	0	3	0	0	0	0	0	0	0	0	0	0	0	0	0	0	0	0	0	0	0	0	0	0	0	0	0	0	0	0	0	0	0	0	0	0	0	0	0	0	0	0	1	1	0	1	0
Corynebacterineae	615	0	0	2	0	1	0	0	0	0	0	0	1	0	0	0	0	0	0	0	0	0	0	0	0	0	0	0	0	0	0	0	0	0	0	1	0	0	0	0	0	0	0	0	0	0	0	1	0
Corynebacterineae	25	0	0	0	0	0	0	0	0	0	0	0	0	0	0	0	0	0	0	0	0	0	0	0	0	0	0	0	0	0	0	0	0	0	0	0	0	0	0	0	0	0	0	0	0	0	2	0	0
Corynebacterineae	1745	0	0	1	0	0	0	0	0	0	0	0	0	0	0	0	0	0	0	0	0	0	0	0	0	0	0	0	0	0	0	0	0	0	0	0	0	0	2	0	0	0	0	0	0	0	0	0	0
Corynebacterineae	2361	0	0	0	0	0	0	0	0	0	0	0	0	0	0	0	0	0	0	0	0	0	0	0	0	0	0	0	0	0	0	0	0	0	0	0	0	0	0	1	0	0	0	0	0	0	1	0	0
Corynebacterineae	632	0	0	0	1	0	0	0	0	0	0	0	0	0	0	0	0	0	0	0	0	0	0	0	0	0	0	0	0	1	0	0	0	0	0	1	0	0	0	0	0	0	0	0	0	0	0	0	0
Corynebacterineae	1864	0	0	0	0	0	0	0	0	0	1	0	0	0	0	0	0	0	0	0	0	0	0	0	0	0	0	0	0	0	0	0	0	0	0	0	1	0	0	0	0	0	0	0	0	0	0	0	0
Corynebacterineae	2316	0	0	1	1	0	0	0	0	0	0	0	0	0	0	0	0	0	0	0	0	0	0	0	0	0	0	0	0	0	0	0	0	0	0	0	0	0	1	0	0	0	0	0	0	0	0	0	0
Corynebacterineae	16	0	0	0	0	0	0	0	0	0	0	0	0	0	0	0	0	0	0	0	0	0	0	0	0	0	0	0	0	0	0	0	0	0	0	0	0	0	0	0	0	0	0	0	0	0	0	0	0
Corynebacterineae	945	0	0	0	0	0	0	0	0	0	0	0	0	0	0	0	0	0	0	0	0	0	0	0	0	0	0	0	0	1	0	0	0	0	0	0	0	0	0	0	0	0	1	0	0	0	0	0	0
Corynebacterineae	1183	0	0	0	0	0	0	0	0	0	0	0	0	0	0	0	0	0	0	0	0	0	0	0	2	0	0	0	0	0	0	0	0	0	0	0	0	0	0	0	0	0	0	0	0	0	0	0	0
Corynebacterineae	2070	0	0	0	0	0	0	0	1	0	0	0	0	0	0	0	0	0	0	0	0	0	0	0	0	0	0	0	0	0	0	0	0	0	0	1	0	0	0	0	0	0	0	0	0	0	0	0	0
Corynebacterineae	279	0	0	0	0	0	0	0	0	0	0	0	0	0	0	0	0	0	0	0	0	0	0	0	0	0	0	0	0	0	0	0	0	0	0	0	0	0	0	0	0	0	0	0	0	0	0	0	0
Corynebacterineae	444	0	0	0	0	0	0	0	0	1	0	0	0	0	0	0	0	0	0	0	0	0	0	0	0	0	0	0	0	0	0	0	0	0	0	0	0	0	0	0	0	0	0	0	0	0	0	0	0
Corynebacterineae	648	0	0	0	0	0	0	0	0	0	0	0	0	0	0	0	0	0	0	1	0	0	0	0	0	0	0	0	0	0	0	0	0	0	0	0	0	0	0	0	0	0	0	0	0	0	0	0	0
Corynebacterineae	1015	0	1	0	0	0	0	0	0	0	0	0	0	0	0	0	0	0	0	0	0	0	0	0	0	0	0	0	0	0	0	0	0	0	0	0	0	0	0	0	0	0	0	0	0	0	0	0	0
Corynebacterineae	1216	0	0	0	0	0	0	0	0	0	0	0	0	0	0	0	0	1	0	0	0	0	0	0	0	0	0	0	0	0	0	0	0	0	0	0	0	0	0	0	0	0	0	0	0	0	0	0	0
Corynebacterineae	1224	0	0	0	0	0	0	0	0	0	0	0	0	0	0	0	0	0	0	1	0	0	0	0	0	0	0	0	0	0	0	0	0	0	0	0	0	0	0	0	0	0	0	0	0	0	0	0	0
Corynebacterineae	1255	0	0	0	0	0	0	0	0	0	0	0	0	0	0	0	0	0	0	0	0	0	0	0	0	0	0	0	0	0	0	0	0	0	0	0	0	0	0	0	1	0	0	0	0	0	0	0	0
Corynebacterineae	1458	0	0	0	0	0	0	0	0	0	0	0	0	0	0	0	0	0	0	0	0	0	0	0	0	0	0	0	0	0	0	0	0	0	0	0	0	0	0	0	0	0	1	0	0	0	0	0	0
Corynebacterineae	1545	0	0	0	0	0	0	0	0	0	0	0	0	0	0	0	0	0	0	0	0	0	0	0	0	0	0	0	0	0	0	0	0	0	0	0	0	0	0	0	0	0	0	0	0	0	0	0	0
Corynebacterineae	1550	0	0	0	0	0	0	0	0	0	0	0	0	0	0	0	0	0	0	1	0	0	0	0	0	0	0	0	0	0	0	0	0	0	0	0	0	0	0	0	0	0	0	0	0	0	0	0	0
Corynebacterineae	1690	0	0	0	0	0	0	0	0	1	0	0	0	0	0	0	0	0	0	0	0	0	0	0	0	0	0	0	0	0	0	0	0	0	0	0	0	0	0	0	0	0	0	0	0	0	0	0	0
Corynebacterineae	1734	0	0	0	0	0	0	0	0	0	0	0	0	0	0	0	0	0	0	0	0	0	0	0	0	0	0	0	0	0	0	0	0	0	0	0	0	0	0	0	0	0	0	0	0	0	0	0	0
Corynebacterineae	1773	0	0	0	0	0	0	0	0	0	0	0	0	0	0	0	0	0	0	1	0	0	0	0	0	0	0	0	0	0	0	0	0	0	0	0	0	0	0	0	0	0	0	0	0	0	0	0	0
Corynebacterineae	1795	0	0	0	0	0	0	0	0	0	0	0	0	0	0	0	0	0	0	0	0	0	0	0	0	0	0	0	0	0	0	0	0	0	0	0	0	0	0	0	0	1	0	0	0	0	0	0	0
Corynebacterineae	1826	0	0	0	0	0	0	0	0	0	0	0	0	0	0	0	0	0	0	0	0	0	0	0	0	0	0	0	0	0	0	0	0	0	0	0	0	0	0	0	0	0	0	0	0	0	0	0	0
Corynebacterineae	1848	0	0	0	0	0	0	0	0	0	0	0	0	0	0	0	0	0	0	1	0	0	0	0	0	0	0	0	0	0	0	0	0	0	0	0	0	0	0	0	0	0	0	0	0	0	0	0	0
Corynebacterineae	1985	0	0	0	0	0	0	0	0	0	0	0	0	0	0	0	0	0	0	0	0	0	0	0	0	0	0	0	0	0	0	0	0	0	0	0	0	0	0	0	0	0	0	1	0	0	0	0	0
Corynebacterineae	2186	0	0	0	0	0	0	0	0	0	0	0	0	0	0	0	0	0	0	0	0	0	0	0	0	0	0	0	0	0	0	0	0	0	0	0	0	0	0	0	0	0	0	0	0	1	0	0	0
Corynebacterineae	2211	0	0	0	0	0	0	0	0	0	0	0	0	0	0	0	0	0	0	0	0	0	0	0	0	0	0	0	0	0	0	0	0	0	0	0	0	0	0	0	0	0	0	0	0	0	0	0	0
Corynebacterineae	2309	0	0	0	0	0	0	0	0	0	0	0	0	0	0	0	0	0	0	0	0	0	0	0	0	0	0	0	0	0	0	0	0	0	0	0	0	0	0	0	0	0	0	0	0	0	0	0	0
Blastococcus	2019	0	0	0	0	0	0	0	0	0	0	2	0	0	0	0	0	0	0	0	0	0	0	0	0	0	0	0	0	0	0	0	0	0	0	0	0	0	0	0	0	0	0	0	0	0	0	0	0
Georgenia	496	0	0	0	0	0	0	0	0	0	0	0	0	0	0	0	0	0	0	0	0	0	0	0	0	0	0	0	0	0	0	0	0	0	0	0	0	0	1	0	0	0	0	0	0	0	0	0	0
Brevibacterium	284	0	0	0	0	0	3	0	1	0	0	0	0	2	1	2	0	0	0	0	0	0	0	0	2	0	0	0	0	0	0	0	0	0	0	0	0	0	0	0	0	0	9	0	19	0	0	0	0
Brevibacterium	130	0	0	0	0	0	0	0	6	0	0	0	0	0	0	0	0	0	0	0	0	0	0	0	0	0	0	0	0	0	0	0	0	0	0	0	0	0	0	0	0	0	0	0	0	0	0	0	0
Brachybacterium	703	0	0	0	0	0	0	0	2	0	0	2	0	0	0	0	0	0	0	0	0	0	0	0	0	0	0	0	0	0	0	0	0	0	0	0	0	0	0	0	0	0	0	0	0	0	0	0	0
Dermabacter	277	0	1	9	1	3	9	0	3	0	9	0	2	0	1	2	0	0	13	2	1	0	0	3	0	0	1	1	1	1	0	0	1	0	1	3	0	4	0	0	0	0	1	0	2	10	0	3	0
Dermabacter	1935	0	0	0	0	0	0	0	0	0	0	0	0	0	0	1	0	0	0	0	0	0	0	0	0	0	0	0	0	0	0	0	0	0	0	0	0	0	0	0	0	0	0	0	0	0	0	0	0
Dermabacter	1570	0	0	0	0	0	0	0	0	0	0	0	0	0	0	0	0	0	2	0	0	0	0	0	0	0	0	0	0	0	0	0	0	0	0	0	0	0	0	0	0	0	0	0	0	1	0	0	0
Dermabacter	2198	0	0	0	0	0	0	0	0	0	0	0	0	0	0	0	0	0	0	0	0	0	0	0	0	0	0	0	0	0	0	0	0	0	0	0	0	0	0	0	0	0	0	0	0	0	0	0	0
Dermabacter	291	0	0	0	0	0	0	0	0	0	0	0	0	0	0	0	0	0	1	0	0	0	0	0	0	0	0	0	0	0	0	0	0	0	0	0	0	0	0	0	0	0	0	0	0	0	0	0	0
Dermabacter	1355	0	0	0	0	0	0	0	0	0	0	0	0	0	0	0	0	0	0	0	0	0	0	0	0	0	0	0	0	0	0	0	0	0	0	0	0	0	0	0	0	0	0	0	0	0	0	0	0
Dermabacter	1655	0	0	0	0	0	0	0	0	0	0	0	0	0	0	0	0	0	0	0	0	0	0	0	0	0	0	0	0	0	0	0	0	0	0	0	0	0	0	0	0	0	0	0	0	0	0	0	0
Dermacoccus	896	0	0	0	0	0	0	0	0	0	0	0	0	0	0	0	0	0	0	0	0	0	0	0	0	0	0	0	0	0	0	0	0	0	0	0	0	0	2	0	0	0	0	0	0	0	0	0	0
Kytococcus	2047	0	0	0	0	0	0	0	0	0	0	0	0	0	0	0	0	0	0	0	0	0	0	0	0	0	0	0	0	0	0	0	0	0	0	0	0	0	0	0	0	0	0	0	0	0	0	0	0
Arsenicicoccus	468	0	0	0	0	0	0	0	0	0	0	8	0	0	0	0	0	0	0	0	0	0	0	0	0	0	0	0	0	0	0	0	0	0	0	0	0	0	0	0	0	0	0	0	0	0	0	0	0
Ornithinimicrobium	319	0	0	0	0	0	1	0	0	0	0	0	0	0	0	0	0	0	0	0	0	0	0	0	0	0	0	0	0	0	0	0	0	0	0	0	0	0	0	0	0	0	0	0	0	0	0	0	0
Intrasporangiaceae	500	0	0	0	0	0	0	0	0	0	0	0	0	0	0	0	0	0	0	0	0	0	0	0	0	0	0	0	0	0	0	0	0	0	0	0	0	0	0	0	0	0	0	1	0	0	0	0	0
Zimmermannella	899	0	0	0	0	0	0	0	0	12	0	0	0	0	0	0	0	0	0	0	0	0	0	0	0	0	0	0	0	0	0	0	0	0	0	0	0	0	0	0	0	0	0	0	18	0	0	0	0
Zimmermannella	1420	0	0	0	0	0	0	0	0	0	0	0	0	0	0	0	0	0	0	0	0	0	0	0	0	0	0	0	0	0	0	0	0	0	0	0	0	0	0	0	0	0	0	0	0	0	0	0	1
Microbacteriaceae	749	0	0	0	0	0	0	0	0	4	0	0	0	1	0	2	0	0	0	0	0	0	0	0	0	0	0	0	0	22	2	0	0	0	5	0	0	0	0	0	0	0	2	0	18	0	0	0	0
Microbacteriaceae	1325	0	0	0	0	0	0	0	0	7	0	0	0	0	0	0	0	0	0	0	0	0	0	0	0	0	0	0	0	0	0	0	0	0	0	0	0	0	0	0	0	0	0	0	0	0	0	0	0
Microbacteriaceae	592	0	0	0	0	0	0	0	0	4	0	0	0	0	0	0	0	0	0	0	0	0	0	0	0	0	0	0	0	0	0	0	0	0	0	0	0	0	0	0	0	0	0	0	0	0	0	0	0
Microbacteriaceae	2046	0	0	0	0	0	0	0	0	0	0	0	0	0	0	0	0	0	0	0	0	0	0	0	0	0	0	0	0	0	0	0	0	0	1	0	0	0	0	0	0	0	0	0	0	0	0	0	0
Microbacteriaceae	21	0	0	0	0	0	0	0	0	1	0	0	0	0	0	0	0	0	0	0	0	0	0	0	0	0	0	0	0	0	0	0	0	0	0	0	0	0	0	0	0	0	0	0	0	0	0	0	0
Microbacteriaceae	495	0	0	0	0	0	0	0	0	0	0	0	0	0	0	0	0	0	0	0	0	0	0	0	0	0	0	0	0	0	0	0	0	0	0	0	0	0	0	0	0	0	0	0	1	0	0	0	0
Microbacteriaceae	935	0	0	0	0	0	0	0	0	1	0	0	0	0	0	0	0	0	0	0	0	0	0	0	0	0	0	0	0	0	0	0	0	0	0	0	0	0	0	0	0	0	0	0	0	0	0	0	0
Microbacteriaceae	1005	0	0	0	0	0	0	0	0	0	0	0	0	0	0	0	0	0	0	0	0	0	0	0	0	0	0	0	0	0	0	0	0	0	0	0	0	0	0	0	0	0	0	0	1	0	0	0	0
Microbacteriaceae	1040	0	0	0	0	0	0	0	0	0	0	0	0	0	0	0	0	0	0	0	0	0	0	0	0	0	0	0	0	0	0	0	0	0	0	0	0	0	0	0	0	0	0	0	1	0	0	0	0
Microbacteriaceae	1260	0	0	0	0	0	0	0	0	0	0	0	0	1	0	0	0	0	0	0	0	0	0	0	0	0	0	0	0	0	0	0	0	0	0	0	0	0	0	0	0	0	0	0	0	0	0	0	0
Microbacteriaceae	1443	0	0	0	0	0	0	0	0	0	0	0	0	0	0	0	0	0	0	0	0	0	0	0	0	0	0	0	0	1	0	0	0	0	0	0	0	0	0	0	0	0	0	0	0	0	0	0	0
Kocuria	1679	0	0	0	0	0	0	0	0	0	0	0	0	0	0	0	0	0	0	0	0	0	0	0	0	0	0	0	0	0	0	0	0	0	0	0	0	0	15	0	0	0	0	0	0	0	0	0	0
Micrococcus	1170	0	0	0	0	0	2	0	0	1	0	6	0	0	0	0	0	0	0	0	0	0	0	0	0	0	0	0	0	0	0	0	0	0	0	0	0	0	0	0	0	0	0	0	0	0	0	0	1
Rothia	1754	0	0	0	0	0	0	0	0	0	0	0	0	0	0	0	0	0	0	0	0	0	0	0	0	0	0	0	0	0	0	0	0	0	1	0	0	0	0	0	0	0	0	0	0	0	0	0	0
Micrococcaceae	2260	0	0	0	0	0	0	0	0	0	3	0	0	0	0	0	0	0	0	0	0	0	0	0	0	0	0	0	0	0	1	0	0	0	0	0	0	0	0	0	0	0	0	0	0	0	0	0	0
Micrococcaceae	1936	0	0	0	0	0	0	0	0	0	0	0	0	0	0	0	0	0	0	0	0	0	0	0	0	0	0	0	0	0	0	0	0	0	0	0	0	0	1	0	0	0	0	0	0	0	0	0	0
Micrococcaceae	1995	0	0	0	0	0	0	0	0	0	0	0	0	0	0	0	0	0	0	0	0	0	0	0	0	0	0	0	0	0	0	0	0	0	0	0	0	0	0	0	0	0	0	0	0	0	0	0	0
Micrococcineae	1521	0	0	0	0	0	0	0	0	0	0	0	0	0	0	0	0	0	1	0	0	0	0	0	0	0	0	0	0	0	0	0	0	0	0	0	0	0	0	0	0	0	0	0	0	0	0	0	0
Micrococcineae	1434	0	0	0	0	0	0	0	0	0	0	0	1	0	0	0	0	0	0	0	0	0	0	0	0	0	0	0	0	0	0	0	0	0	0	0	0	0	0	0	0	0	0	0	0	0	0	0	0
Micrococcineae	798	0	0	0	0	0	0	0	0	0	0	0	0	0	0	0	0	0	0	0	0	0	0	0	0	0	0	0	0	0	0	1	0	0	0	0	0	0	0	0	0	0	0	0	0	0	0	0	0
Micrococcineae	982	0	0	0	0	0	0	0	0	0	0	0	0	0	0	1	0	0	0	0	0	0	0	0	0	0	0	0	0	0	0	0	0	0	0	0	0	0	0	0	0	0	0	0	0	0	0	0	0
Micrococcineae	1495	0	0	0	0	0	0	0	0	0	0	0	0	0	0	0	0	0	0	0	0	0	0	0	0	0	0	0	0	0	0	0	0	0	0	0	0	0	0	0	0	0	0	0	0	0	0	0	0
Micrococcineae	2183	0	0	0	0	0	0	0	0	0	0	0	0	0	0	0	0	0	0	0	0	0	0	0	0	0	0	0	0	0	0	0	0	0	0	0	0	0	0	0	0	0	0	0	0	0	0	0	0
Micrococcineae	2321	0	0	0	0	0	0	0	0	0	0	0	0	0	0	1	0	0	0	0	0	0	0	0	0	0	0	0	0	0	0	0	0	0	0	0	0	0	0	0	0	0	0	0	0	0	0	0	0
Micromonosporaceae	1382	0	0	0	0	0	0	0	0	0	0	0	0	1	0	0	0	0	0	0	0	0	0	0	0	0	0	0	0	0	0	0	0	0	0	0	0	0	0	0	0	0	0	0	0	0	0	0	0
Marmoricola	607	0	0	0	0	0	0	0	0	0	0	0	0	0	0	0	0	0	0	0	0	0	0	0	0	0	0	0	0	0	0	0	0	0	0	0	0	0	0	0	0	0	0	0	0	0	0	0	0
Nocardioides	747	0	0	0	0	0	0	0	0	0	0	0	0	0	0	0	0	0	0	0	0	0	0	0	0	0	0	0	0	0	0	0	0	0	0	0	0	0	0	0	0	0	0	0	0	0	0	0	0
Nocardioides	612	0	0	0	0	0	0	0	0	0	0	0	0	0	0	0	0	0	0	0	0	0	0	0	0	0	0	0	0	0	1	0	0	0	0	0	0	0	0	0	0	0	0	0	1	0	0	0	0
Nocardioides	301	0	0	0	0	0	0	0	0	0	0	0	0	0	0	0	0	0	0	0	0	0	0	0	0	0	0	0	0	0	0	0	0	0	0	0	0	0	0	0	0	0	0	0	0	0	0	0	0
Nocardioidaceae	542	0	0	0	0	0	0	0	0	0	0	0	0	0	0	0	0	0	0	0	0	0	0	0	0	0	0	0	0	0	0	0	0	0	0	0	0	0	2	0	0	0	0	0	0	0	0	0	0
Nocardioidaceae	312	0	0	0	0	0	0	0	0	0	0	0	0	0	0	0	0	0	0	1	0	0	0	0	0	0	0	0	0	0	0	0	0	0	0	0	0	0	0	0	0	0	0	0	0	0	0	0	0
Propionibacterium	1030	0	0	0	0	0	0	0	0	0	0	1	0	0	0	0	0	0	0	0	0	0	0	0	0	0	0	0	0	0	0	0	0	0	0	0	0	0	0	0	0	0	0	1	0	0	0	0	0
Propionibacteriaceae	1811	0	0	1	0	0	0	0	0	0	0	0	0	0	0	0	0	0	0	0	0	0	0	0	0	0	0	0	0	0	0	0	0	0	0	0	0	0	0	0	0	0	0	0	0	0	0	0	0
Pseudonocardia	681	0	0	0	0	0	0	1	0	0	0	0	0	0	0	0	0	0	0	0	0	0	0	0	0	0	0	0	0	0	0	0	0	0	0	0	0	0	0	0	0	0	0	0	0	0	0	0	0
Pseudonocardiaceae	855	0	0	0	0	0	0	0	0	0	0	1	0	0	0	0	0	0	0	0	0	0	0	0	0	0	0	0	0	0	0	0	0	0	0	0	0	0	0	0	0	0	0	0	0	0	0	0	0
Actinomycetales	631	0	0	0	0	0	0	0	0	1	0	0	0	0	0	0	0	0	0	0	0	0	0	0	0	0	0	0	0	0	0	0	0	0	0	0	0	0	0	0	0	0	0	0	0	0	0	0	0
Thermomonosporaceae	320	0	0	0	0	0	0	0	0	0	0	0	0	0	0	0	0	0	0	0	0	0	0	0	0	0	0	0	0	0	0	0	0	0	0	0	0	0	0	0	0	0	0	0	0	0	0	0	0
Actinomycetales	1929	0	0	0	0	0	0	0	0	0	0	0	0	0	0	0	0	0	0	0	0	0	1	0	0	0	0	0	0	0	0	0	0	0	0	0	0	0	0	0	0	0	0	0	4	0	0	0	0
Actinomycetales	888	0	0	0	0	0	0	0	0	0	0	0	0	0	0	0	0	0	0	0	0	0	0	0	0	0	0	0	0	0	0	0	0	0	0	0	0	0	0	1	0	0	0	0	0	0	3	0	0
Actinomycetales	2103	0	0	0	0	0	0	0	0	0	0	0	0	0	0	0	0	0	0	0	0	0	0	0	1	1	0	0	0	0	0	0	0	0	0	0	1	0	0	0	0	0	1	0	0	0	0	0	0
Actinomycetales	2185	0	0	0	0	0	0	0	0	0	0	0	0	0	0	1	0	0	0	0	0	0	0	0	0	0	1	0	0	0	0	0	0	0	0	0	0	0	0	0	0	0	0	0	0	0	0	0	0
Actinomycetales	2016	0	0	0	0	0	0	0	0	0	0	0	0	0	0	0	0	0	0	0	0	0	0	0	0	0	0	0	0	0	0	0	0	0	0	0	0	0	0	0	0	0	0	1	0	0	0	0	0
Actinomycetales	2031	0	0	0	0	0	0	0	0	0	0	0	0	0	1	0	0	0	0	0	0	0	0	0	0	0	0	0	0	0	0	0	0	0	0	0	0	0	0	0	0	0	0	0	0	0	0	0	0
Actinomycetales	447	0	0	0	0	0	0	0	0	0	0	0	0	0	0	0	0	1	0	0	0	0	0	0	0	0	0	0	0	0	0	0	0	0	0	0	0	0	0	0	0	0	0	0	0	0	0	0	0
Actinomycetales	473	0	0	0	0	0	0	0	0	0	0	0	0	0	0	1	0	0	0	0	0	0	0	0	0	0	0	0	0	0	0	0	0	0	0	0	0	0	0	0	0	0	0	0	0	0	0	0	0
Actinomycetales	581	0	0	0	0	0	0	1	0	0	0	0	0	0	0	0	0	0	0	0	0	0	0	0	1	0	0	0	0	0	0	0	0	0	0	0	0	0	0	0	0	0	0	0	0	0	0	0	0
Actinomycetales	603	0	0	0	0	0	0	0	0	0	0	0	0	0	0	0	0	0	0	0	0	0	0	0	1	0	1	0	0	0	0	0	0	0	0	0	0	0	0	0	0	0	0	0	0	0	0	0	0
Actinomycetales	894	0	0	0	0	0	0	0	0	0	0	0	0	0	0	0	0	0	0	0	0	1	0	0	0	1	0	0	0	0	0	0	0	0	0	0	0	0	0	0	0	0	0	0	0	0	0	0	0
Actinomycetales	1007	0	0	0	0	0	0	0	0	0	0	0	0	0	0	0	0	0	0	2	0	0	0	0	0	0	0	0	0	0	0	0	0	0	0	0	0	0	0	0	0	0	0	0	0	0	0	0	0
Actinomycetales	1013	0	0	0	0	0	0	0	0	0	0	0	0	0	0	0	0	0	0	0	0	0	0	0	0	0	0	0	0	0	0	0	0	0	0	0	1	0	0	0	0	0	1	0	0	0	0	0	0
Actinomycetales	1185	0	0	0	0	0	0	0	0	0	0	0	0	0	0	0	0	0	0	0	0	0	1	0	0	0	0	0	0	1	0	0	0	0	0	0	0	0	0	0	0	0	0	0	0	0	0	0	0
Actinomycetales	1373	0	0	0	0	0	0	0	0	0	0	1	0	0	0	0	0	0	0	0	1	0	0	0	0	0	0	0	0	0	0	0	0	0	0	0	0	0	0	0	0	0	0	0	0	0	0	0	0
Actinomycetales	1519	0	0	0	0	0	0	0	0	0	1	0	0	0	0	0	0	0	0	0	0	0	0	0	0	0	0	0	0	0	0	0	0	0	0	0	0	0	0	0	0	0	0	1	0	0	0	0	0
Actinomycetales	2159	0	0	0	0	0	0	0	0	0	0	0	0	0	0	0	0	0	0	0	0	0	0	0	1	1	0	0	0	0	0	0	0	0	0	0	0	0	0	0	0	0	0	0	0	0	0	0	0
Actinomycetales	7	0	0	0	0	0	0	0	0	0	0	0	0	0	0	0	0	0	0	0	0	0	0	0	0	0	0	0	0	0	0	0	0	0	0	0	0	0	0	0	1	0	0	0	0	0	0	0	0
Actinomycetales	23	0	0	0	0	0	0	0	0	0	0	0	0	0	0	0	0	0	0	0	0	0	0	0	0	0	0	0	0	0	0	0	0	0	0	0	0	0	0	0	0	0	0	0	0	0	0	0	0
Actinomycetales	34	0	0	0	0	0	0	0	0	0	0	0	0	0	0	0	0	0	0	0	0	0	0	1	0	0	0	0	0	0	0	0	0	0	0	0	0	0	0	0	0	0	0	0	0	0	0	0	0
Actinomycetales	97	0	0	0	0	0	0	0	0	0	0	0	0	0	0	0	0	0	0	0	0	0	0	0	0	0	0	0	0	0	0	0	0	0	0	0	0	0	0	0	0	0	0	1	0	0	0	0	0
Actinomycetales	129	0	0	0	0	0	0	0	0	0	0	0	0	0	0	0	0	0	0	0	0	0	0	0	0	1	0	0	0	0	0	0	0	0	0	0	0	0	0	0	0	0	0	0	0	0	0	0	0
Actinomycetales	148	0	0	0	0	0	0	1	0	0	0	0	0	0	0	0	0	0	0	0	0	0	0	0	0	0	0	0	0	0	0	0	0	0	0	0	0	0	0	0	0	0	0	0	0	0	0	0	0
Actinomycetales	263	0	0	0	0	0	0	0	0	0	0	0	0	0	0	0	0	0	0	0	0	0	0	0	0	0	0	0	0	0	0	0	0	0	0	0	0	0	0	0	0	0	1	0	0	0	0	0	0
Actinomycetales	316	0	0	0	0	0	0	0	0	0	0	0	0	0	0	0	0	0	0	0	0	0	0	0	1	0	0	0	0	0	0	0	0	0	0	0	0	0	0	0	0	0	0	0	0	0	0	0	0
Actinomycetales	381	0	0	0	0	0	0	0	0	0	0	0	0	0	0	0	0	0	0	0	0	0	0	0	0	0	0	0	0	0	0	0	0	0	0	0	0	0	0	0	0	0	0	0	0	0	0	0	0
Actinomycetales	548	0	0	0	0	0	0	0	0	0	0	0	0	0	0	1	0	0	0	0	0	0	0	0	0	0	0	0	0	0	0	0	0	0	0	0	0	0	0	0	0	0	0	0	0	0	0	0	0
Actinomycetales	728	0	0	0	0	0	0	0	0	0	0	0	0	0	0	0	0	0	0	0	0	0	0	0	0	0	0	0	0	1	0	0	0	0	0	0	0	0	0	0	0	0	0	0	0	0	0	0	0
Actinomycetales	1002	0	0	0	0	0	0	0	0	0	0	0	0	0	0	0	0	0	0	0	0	0	0	0	0	0	0	0	0	0	0	0	0	0	0	0	0	0	0	0	0	0	0	0	0	0	0	0	0
Actinomycetales	1053	0	0	0	0	0	0	0	0	0	0	0	0	0	0	0	0	0	0	0	0	0	0	0	1	0	0	0	0	0	0	0	0	0	0	0	0	0	0	0	0	0	0	0	0	0	0	0	0
Actinomycetales	1153	0	0	1	0	0	0	0	0	0	0	0	0	0	0	0	0	0	0	0	0	0	0	0	0	0	0	0	0	0	0	0	0	0	0	0	0	0	0	0	0	0	0	0	0	0	0	0	0
Actinomycetales	1182	0	0	0	0	0	0	0	0	0	0	0	0	0	0	0	0	0	0	0	0	0	0	1	0	0	0	0	0	0	0	0	0	0	0	0	0	0	0	0	0	0	0	0	0	0	0	0	0
Actinomycetales	1249	0	0	0	0	0	0	0	0	0	0	0	0	0	0	0	0	1	0	0	0	0	0	0	0	0	0	0	0	0	0	0	0	0	0	0	0	0	0	0	0	0	0	0	0	0	0	0	0
Actinomycetales	1251	0	0	0	0	0	0	0	0	0	0	0	0	0	0	0	0	0	0	0	0	0	0	0	0	0	0	0	0	0	0	0	0	0	0	0	0	0	0	0	0	0	0	0	0	0	0	0	0
Actinomycetales	1485	0	0	0	0	0	0	0	0	0	0	0	0	0	0	0	0	0	0	0	0	0	0	0	0	0	0	0	0	0	0	0	0	0	0	0	0	0	0	0	0	0	0	0	0	0	0	0	0
Actinomycetales	1490	0	0	0	0	0	0	0	0	0	0	0	0	0	0	0	0	0	0	0	0	0	0	0	0	0	0	0	0	0	0	0	0	0	0	0	0	0	0	0	0	0	0	1	0	0	0	0	0
Actinomycetales	1514	0	0	0	0	0	0	0	0	0	0	0	0	0	0	0	0	0	0	1	0	0	0	0	0	0	0	0	0	0	0	0	0	0	0	0	0	0	0	0	0	0	0	0	0	0	0	0	0
Actinomycetales	1529	0	0	0	0	0	0	0	0	0	0	0	0	0	0	0	0	0	0	0	0	0	0	0	0	0	0	0	0	0	0	0	0	0	0	0	0	0	0	0	0	0	0	0	0	0	0	0	0
Actinomycetales	1697	0	0	0	0	0	0	0	0	0	0	0	0	0	0	0	0	0	0	0	0	0	0	0	0	0	0	1	0	0	0	0	0	0	0	0	0	0	0	0	0	0	0	0	0	0	0	0	0
Actinomycetales	1812	0	0	0	0	0	0	0	0	0	0	0	0	0	0	0	0	0	0	0	0	0	0	0	0	0	0	0	0	0	0	0	0	0	0	0	0	0	0	0	0	0	0	0	0	0	0	0	0
Actinomycetales	1822	0	0	0	0	0	0	0	0	0	0	0	0	0	0	0	0	0	0	0	0	0	0	0	0	0	0	0	0	0	0	0	0	0	0	0	0	0	0	0	0	0	0	0	0	0	0	0	0
Actinomycetales	1855	0	0	0	0	0	0	0	0	0	0	0	0	0	0	0	0	0	0	0	0	0	0	0	0	0	0	0	0	0	0	0	0	0	0	0	0	0	0	0	0	0	0	0	0	0	0	0	0
Actinomycetales	2226	0	0	0	0	0	0	0	0	0	0	0	0	0	0	0	0	0	0	0	0	0	0	0	0	0	0	0	0	0	0	0	0	0	0	0	0	0	0	0	0	0	0	0	0	0	0	0	0
Actinomycetales	2258	0	0	0	0	0	0	0	0	0	0	0	0	0	0	0	1	0	0	0	0	0	0	0	0	0	0	0	0	0	0	0	0	0	0	0	0	0	0	0	0	0	0	0	0	0	0	0	0
Actinomycetales	2278	0	0	0	0	0	0	0	0	0	0	0	0	0	0	0	0	0	0	0	0	0	0	0	0	1	0	0	0	0	0	0	0	0	0	0	0	0	0	0	0	0	0	0	0	0	0	0	0
Actinomycetales	2324	0	0	0	0	0	0	0	0	0	0	0	0	0	0	0	0	0	0	0	0	1	0	0	0	0	0	0	0	0	0	0	0	0	0	0	0	0	0	0	0	0	0	0	0	0	0	0	0
Bifidobacterium	2174	0	0	0	0	0	0	0	0	0	0	0	0	0	0	0	0	0	0	0	0	0	0	0	0	0	0	0	0	0	0	0	0	0	0	0	0	0	0	0	0	0	0	0	0	0	0	0	0
Gardnerella	1494	0	0	0	0	0	0	0	0	0	0	0	0	0	0	0	0	0	0	0	0	0	0	0	0	0	0	0	0	0	0	0	0	0	0	0	0	0	0	0	0	0	0	0	0	0	0	0	0
Bifidobacteriaceae	1403	0	0	0	0	0	0	0	0	0	0	0	0	0	0	0	0	0	0	0	0	0	0	0	0	0	0	0	0	0	0	0	0	0	0	0	0	0	0	0	0	0	0	0	0	0	0	0	0
Turicella	1905	0	0	2	0	0	0	0	0	0	0	0	0	0	0	0	0	0	0	0	0	0	0	0	0	0	0	0	0	0	0	0	0	0	0	0	0	0	0	0	1	0	0	0	0	0	0	0	0
Actinobacteridae	363	2	0	38	1	2	18	17	3	0	5	0	10	0	0	0	4	0	38	1	0	1	0	0	1	0	1	2	1	7	7	0	1	74	4	0	0	0	0	3	20	1	1	0	0	0	0	1	1
Actinobacteridae	213	1	0	0	1	1	0	0	6	1	2	11	0	5	3	2	1	0	1	0	12	15	0	3	3	1	13	11	9	0	1	0	2	11	1	1	4	1	1	2	6	2	3	3	5	0	0	0	3
Actinobacteridae	1334	0	0	8	0	1	0	0	1	0	0	0	0	0	0	0	0	2	0	1	0	0	3	0	0	0	1	0	0	0	0	0	0	0	0	0	0	0	0	3	0	0	1	0	6	3	0	9	0
Actinobacteridae	1159	5	0	0	0	0	0	3	0	0	0	0	0	1	7	0	6	0	0	0	0	0	0	0	0	12	0	0	0	0	0	0	2	0	0	0	0	0	0	0	0	0	0	0	0	0	0	0	0
Actinobacteridae	911	0	0	1	0	0	0	0	1	0	0	0	0	0	0	0	0	0	0	0	0	0	2	0	0	0	0	0	0	0	0	0	0	0	0	0	0	0	0	0	0	0	0	0	7	3	0	4	0
Actinobacteridae	2102	0	0	0	0	0	0	0	0	0	1	0	0	0	0	0	0	2	0	0	0	0	1	0	0	0	0	0	0	0	0	0	0	0	0	0	0	0	1	0	0	0	0	0	0	0	0	0	0
Actinobacteridae	1430	0	0	0	0	0	0	0	0	2	0	0	0	0	0	0	0	0	0	0	0	0	0	0	0	0	0	0	0	0	0	0	0	0	0	0	0	0	0	0	0	0	0	0	0	0	2	0	0
Actinobacteridae	904	0	0	0	0	0	0	0	0	0	0	0	0	0	0	0	0	0	0	0	1	0	0	0	0	0	0	0	1	0	0	0	0	0	0	0	0	0	0	0	0	0	1	0	0	0	0	0	0
Actinobacteridae	70	0	0	0	1	0	0	0	0	0	0	0	0	0	0	0	0	0	0	0	0	0	0	0	0	0	0	0	0	0	0	0	0	0	0	0	0	0	0	0	0	0	0	0	0	0	0	0	0
Actinobacteridae	852	0	0	0	0	0	1	0	0	0	0	0	0	0	0	0	0	0	0	0	0	0	0	0	0	0	0	1	0	0	0	0	0	0	0	0	0	0	0	0	0	0	0	0	0	0	0	0	0
Actinobacteridae	903	0	0	0	0	0	0	0	0	0	0	0	0	0	0	0	0	0	0	0	0	0	0	0	3	0	0	0	0	0	0	0	0	0	0	0	0	0	0	0	0	0	0	0	0	0	0	0	0
Actinobacteridae	1306	0	0	0	0	0	0	0	0	0	0	0	0	0	0	0	0	0	0	0	0	0	0	0	0	0	0	0	0	0	0	0	0	0	0	0	0	0	0	0	0	0	0	0	0	1	0	0	0
Actinobacteridae	1364	0	0	0	0	1	0	0	0	0	0	0	0	0	0	0	0	0	0	0	0	0	0	0	0	0	0	0	0	0	0	0	0	0	0	2	0	0	0	0	0	0	0	0	0	0	0	0	0
Actinobacteridae	1488	0	0	0	0	0	0	0	0	0	0	0	0	0	0	0	0	0	0	0	0	0	0	0	0	0	0	0	0	0	0	0	0	0	0	0	0	0	0	0	0	0	0	0	0	0	0	0	0
Actinobacteridae	1889	0	0	0	0	0	0	0	0	0	0	0	0	0	0	0	0	0	0	0	0	0	0	0	0	0	0	0	0	0	0	0	0	1	0	0	0	0	0	0	0	0	0	0	0	0	0	0	0
Actinobacteridae	58	0	0	0	0	0	0	0	0	0	0	0	0	0	0	0	0	0	0	0	0	0	0	0	0	0	0	0	0	0	0	0	0	0	0	0	0	0	0	0	0	0	0	0	0	0	0	0	0
Actinobacteridae	1233	0	0	0	0	1	0	0	0	0	0	0	0	1	0	0	0	0	0	0	0	0	0	0	0	0	0	0	0	0	0	0	0	0	0	0	0	0	0	0	0	0	0	0	0	0	0	0	0
Actinobacteridae	1678	0	0	0	0	0	0	0	0	0	0	0	0	0	0	0	0	0	0	0	0	0	0	0	0	0	0	0	0	0	0	0	0	0	0	0	0	0	0	0	0	0	0	0	1	0	0	1	0
Actinobacteridae	2263	0	0	0	0	0	0	0	0	0	0	0	0	0	0	0	0	0	0	0	0	0	0	0	0	0	0	0	0	0	0	0	0	0	0	0	0	0	0	0	0	0	0	0	0	0	1	0	0
Actinobacteridae	159	0	0	0	0	0	0	1	0	0	0	0	0	0	0	0	0	0	0	0	0	0	0	0	0	0	0	0	0	0	0	0	0	0	0	0	0	0	0	0	0	0	0	0	0	0	0	0	0
Actinobacteridae	313	0	0	0	0	0	0	0	0	0	0	0	0	0	0	0	0	0	0	0	0	0	0	0	0	0	1	0	0	0	0	0	0	0	0	0	0	0	0	0	0	0	0	0	0	0	0	0	0
Actinobacteridae	376	0	0	0	0	0	0	0	0	0	0	0	0	0	0	0	0	1	0	0	0	0	0	0	0	0	0	0	0	0	0	0	0	0	0	0	0	0	0	0	0	0	0	0	0	0	0	0	0
Actinobacteridae	431	0	0	0	0	0	0	0	0	0	0	0	0	0	0	0	0	0	0	0	0	0	0	0	0	0	0	0	0	0	0	0	0	0	0	0	0	0	1	0	0	0	0	0	0	0	0	0	0
Actinobacteridae	507	0	0	0	0	0	0	0	0	0	0	0	0	0	0	0	0	0	0	0	0	0	0	0	0	0	0	0	0	0	0	0	0	0	0	0	0	0	0	0	0	0	0	0	1	0	0	0	0
Actinobacteridae	511	0	0	0	0	0	0	0	0	0	0	0	0	0	0	0	0	0	0	0	0	0	0	0	0	0	0	0	0	0	0	0	0	0	0	0	0	0	0	0	0	0	0	0	0	0	0	0	0
Actinobacteridae	568	0	0	0	0	0	0	0	0	0	0	0	0	0	0	0	0	0	0	0	0	0	0	0	0	0	0	0	0	0	0	0	0	0	0	0	0	0	0	0	0	0	1	0	0	0	0	0	0
Actinobacteridae	580	0	0	0	0	0	0	0	0	0	0	0	0	0	0	0	0	0	0	0	0	0	0	0	0	0	0	0	0	0	0	0	0	0	0	0	0	0	0	0	0	0	0	0	0	1	0	0	0
Actinobacteridae	606	0	0	0	0	0	0	0	0	0	0	0	0	0	0	0	0	0	0	0	0	0	0	0	0	0	0	0	0	0	0	0	0	0	0	0	0	0	0	0	0	0	0	0	0	0	0	0	0
Actinobacteridae	633	0	0	0	0	0	0	0	0	0	0	0	0	0	0	0	0	0	0	0	0	0	0	0	0	0	0	0	0	0	0	0	0	0	0	0	0	1	0	0	0	0	0	0	0	0	0	0	0
Actinobacteridae	978	0	0	0	0	0	0	0	0	0	0	0	0	0	0	0	0	0	0	0	0	0	0	0	0	0	0	0	0	0	0	0	0	0	0	0	0	0	0	0	0	0	0	0	0	0	0	0	0
Actinobacteridae	996	0	0	0	0	0	0	0	0	0	0	0	0	0	0	0	0	0	1	0	0	0	0	0	0	0	0	0	0	0	0	0	0	0	0	0	0	0	0	0	0	0	0	0	0	0	0	0	0
Actinobacteridae	1132	0	0	0	0	0	0	0	0	0	0	0	0	0	0	0	0	0	0	0	0	0	0	0	0	0	0	0	0	0	0	0	0	0	0	1	0	0	0	0	0	0	0	0	0	0	0	0	0
Actinobacteridae	1342	0	0	0	0	0	0	0	0	0	0	0	0	0	0	0	0	0	0	0	0	0	0	0	0	0	0	0	0	0	0	0	0	0	0	0	0	0	0	0	0	0	0	0	0	1	0	0	0
Actinobacteridae	1448	0	0	0	0	0	0	0	0	0	0	0	0	0	0	0	0	0	0	0	0	0	0	0	0	0	0	0	0	0	0	0	0	0	0	0	0	0	1	0	0	0	0	0	0	0	0	0	0
Actinobacteridae	1750	0	0	0	0	0	0	0	0	0	0	0	0	0	0	0	0	0	0	0	0	1	0	0	0	0	0	0	0	0	0	0	0	0	0	0	0	0	0	0	0	0	0	0	0	0	0	0	0
Actinobacteridae	1942	0	0	0	0	0	0	0	0	1	0	0	0	0	0	0	0	0	0	0	0	0	0	0	0	0	0	0	0	0	0	0	0	0	0	0	0	0	0	0	0	0	0	0	0	0	0	0	0
Actinobacteridae	2052	0	0	0	0	0	0	0	0	0	0	0	0	0	0	0	0	0	0	0	0	0	1	0	0	0	0	0	0	0	0	0	0	0	0	0	0	0	0	0	0	0	0	0	0	0	0	0	0
Actinobacteridae	2131	0	0	0	0	0	0	0	0	0	0	0	0	0	0	0	0	0	0	0	0	0	0	0	0	1	0	0	0	0	0	0	0	0	0	0	0	0	0	0	0	0	0	0	0	0	0	0	0
Actinobacteridae	2273	0	0	0	0	0	0	0	0	0	0	0	0	0	0	0	0	0	0	0	0	0	0	0	0	0	0	0	0	1	0	0	0	0	0	0	0	0	0	0	0	0	0	0	0	0	0	0	0
Coriobacteriaceae	1418	0	0	0	0	0	0	0	0	0	4	0	0	0	0	0	0	0	0	0	1	0	0	0	0	0	0	0	0	0	0	0	0	0	0	0	0	0	0	1	0	0	0	0	0	0	0	0	0
Rubrobacteraceae	578	0	0	0	0	0	0	0	0	0	0	0	1	0	0	0	0	0	0	0	0	0	0	0	0	0	0	0	0	0	0	0	0	0	0	0	0	0	0	0	0	0	0	0	0	0	0	0	0
Rubrobacteraceae	1151	0	0	0	0	0	0	0	0	0	0	0	0	0	0	0	0	0	0	0	0	0	0	0	0	0	0	0	0	0	0	0	0	0	1	0	0	0	0	0	0	0	0	0	0	0	0	0	0
Actinobacteria	59	0	0	0	0	0	0	0	0	0	0	0	0	0	0	0	0	0	0	0	0	0	0	0	0	0	0	1	0	0	0	0	0	0	0	0	0	0	0	0	0	0	0	0	0	0	0	0	0
Bacteroides	1973	0	0	0	0	0	0	0	0	0	0	0	1	0	0	0	0	0	0	0	0	0	0	0	0	0	0	0	0	0	0	0	0	0	0	0	0	0	0	0	0	0	0	0	0	0	0	0	0
Porphyromonas	1573	23	1	0	0	0	1	0	3	0	0	0	0	2	3	0	0	0	0	0	29	20	0	0	0	3	19	8	19	0	0	0	5	0	1	0	0	0	0	6	12	3	1	0	0	0	0	1	1
Porphyromonas	2007	0	11	0	0	3	3	3	2	0	22	0	1	0	0	0	11	0	0	0	5	1	0	0	0	1	8	4	11	7	5	0	1	5	5	0	17	0	0	0	5	0	6	0	0	0	0	0	7
Porphyromonas	1379	0	0	0	0	0	0	0	0	0	0	0	0	0	2	0	0	0	0	0	0	0	0	0	0	0	0	0	0	0	4	0	1	0	1	0	2	0	0	0	0	0	0	0	0	0	0	0	1
Porphyromonas	1257	1	0	0	0	0	0	0	0	0	0	0	0	0	0	0	0	0	0	0	1	3	0	0	0	0	3	1	1	0	0	0	0	0	0	0	0	0	0	0	1	0	0	0	0	0	0	0	0
Porphyromonas	1280	0	0	0	0	0	0	0	0	0	0	0	0	0	0	0	2	0	0	1	0	0	0	0	0	0	0	1	0	0	0	0	0	0	0	0	0	0	0	0	0	0	0	0	0	0	0	0	0
Porphyromonas	2215	0	0	0	0	0	0	0	0	0	0	0	0	0	0	0	0	0	0	0	0	0	0	0	0	0	1	0	0	0	0	0	0	0	0	0	0	0	0	0	0	1	0	0	0	0	0	0	0
Porphyromonas	131	0	0	0	0	0	0	0	0	0	0	0	0	0	0	0	1	0	0	0	0	2	0	0	0	0	0	0	0	0	0	0	0	0	0	0	0	0	0	0	0	0	0	0	0	0	0	0	0
Porphyromonas	552	0	0	0	0	0	0	0	0	0	0	0	0	0	0	0	0	0	0	0	0	1	0	0	0	0	0	0	0	0	0	0	0	0	0	0	0	0	0	0	1	0	0	0	0	0	0	0	0
Porphyromonas	757	0	0	0	0	0	0	0	0	0	0	0	0	0	0	0	1	0	0	0	0	0	0	0	0	0	0	0	0	0	0	0	0	0	0	0	0	0	0	0	0	0	0	0	0	0	0	0	0
Porphyromonas	843	0	0	0	0	0	0	0	0	0	0	0	0	0	0	0	0	0	0	0	0	1	0	0	0	0	0	0	0	0	0	0	0	0	0	0	0	0	0	0	1	0	0	0	0	0	0	0	0
Porphyromonas	1119	0	0	0	0	0	0	0	0	0	0	0	0	0	0	0	0	0	0	0	1	0	0	0	0	0	0	0	0	0	0	0	0	0	0	0	1	0	0	0	0	0	0	0	0	0	0	0	0
Porphyromonas	83	0	0	0	0	0	0	0	0	0	0	0	0	0	0	0	1	0	0	0	0	0	0	0	0	0	0	0	0	0	0	0	0	0	0	0	0	0	0	0	0	0	0	0	0	0	0	0	0
Porphyromonas	266	0	0	0	0	0	0	0	0	0	0	0	0	0	0	0	0	0	0	0	0	0	0	0	0	0	0	1	0	0	0	0	0	0	0	0	0	0	0	0	0	0	0	0	0	0	0	0	0
Porphyromonas	1115	0	0	0	0	0	0	0	0	0	0	0	0	0	0	0	0	0	0	0	0	0	0	0	0	0	0	1	0	0	0	0	0	0	0	0	0	0	0	0	0	0	0	0	0	0	0	0	0
Porphyromonas	1169	0	0	0	0	0	0	0	0	0	0	0	0	0	0	0	0	0	0	0	0	0	0	0	0	0	0	1	0	0	0	0	0	0	0	0	0	0	0	0	0	0	0	0	0	0	0	0	0
Porphyromonas	1375	0	0	0	0	0	0	0	0	0	0	0	0	0	0	0	0	0	0	0	0	0	0	0	0	0	0	0	0	0	0	0	0	0	0	0	0	0	0	0	0	0	0	0	0	0	0	0	0
Porphyromonas	1516	0	0	0	0	0	0	0	0	0	0	0	0	0	0	0	0	0	0	0	0	0	0	0	0	0	0	0	0	0	0	0	0	0	0	0	0	0	0	1	0	0	0	0	0	0	0	0	0
Porphyromonas	1722	0	0	0	0	0	0	0	0	0	0	0	0	0	0	0	0	0	0	0	0	0	0	0	0	0	0	0	0	0	0	0	0	0	0	0	0	0	0	0	0	0	0	0	0	0	0	0	0
Porphyromonas	1853	0	0	0	0	0	0	1	0	0	0	0	0	0	0	0	0	0	0	0	0	0	0	0	0	0	0	0	0	0	0	0	0	0	0	0	0	0	0	0	0	0	0	0	0	0	0	0	0
Porphyromonas	2141	0	0	0	0	0	0	0	0	0	0	0	0	0	0	0	0	0	0	0	0	1	0	0	0	0	0	0	0	0	0	0	0	0	0	0	0	0	0	0	0	0	0	0	0	0	0	0	0
Porphyromonadaceae	707	0	0	0	1	0	0	0	7	0	1	2	0	2	7	0	52	0	0	0	8	10	1	0	0	18	8	13	10	0	3	0	12	0	4	0	2	0	0	0	0	0	0	0	0	0	0	0	1
Porphyromonadaceae	463	0	0	0	0	0	0	0	0	0	0	1	0	0	0	0	0	0	0	0	0	0	0	0	0	0	0	0	0	0	0	0	0	0	0	0	0	0	0	0	0	0	0	0	0	0	0	0	0
Porphyromonadaceae	1662	0	1	0	0	0	0	0	0	0	0	0	0	0	0	0	0	0	0	0	0	0	0	0	0	0	0	0	0	0	0	0	0	0	0	0	0	1	0	0	0	0	0	0	0	0	0	0	0
Porphyromonadaceae	285	0	0	0	0	0	0	0	0	0	0	0	0	0	0	0	0	0	0	0	0	1	0	0	0	0	0	0	0	0	0	0	0	0	0	0	0	0	0	0	1	0	0	0	0	0	0	0	0
Porphyromonadaceae	75	0	0	0	0	0	0	0	0	0	0	0	0	0	0	0	1	0	0	0	0	1	0	0	0	0	0	0	0	0	0	0	0	0	0	0	0	0	0	0	0	0	0	0	0	0	0	0	0
Porphyromonadaceae	1799	0	0	0	0	0	0	0	0	0	0	0	0	0	0	0	1	0	0	0	0	1	0	0	0	0	0	0	0	0	0	0	0	0	0	0	0	0	0	0	0	0	0	0	0	0	0	0	0
Porphyromonadaceae	1006	0	0	0	0	0	0	0	0	0	0	0	0	0	0	0	0	0	0	0	0	0	0	0	0	0	0	0	0	0	0	0	0	0	0	0	0	0	0	0	0	0	0	0	0	0	0	0	0
Porphyromonadaceae	1654	0	0	0	0	0	0	0	0	0	0	0	0	0	0	0	0	0	0	0	0	0	0	0	0	0	0	0	0	0	0	0	0	0	0	0	0	0	0	0	0	0	0	0	0	0	0	0	0
Porphyromonadaceae	2023	0	0	0	0	0	0	0	1	0	0	0	0	0	0	0	0	0	0	0	0	0	0	0	0	0	0	0	0	0	0	0	0	0	0	0	0	0	0	0	0	0	0	0	0	0	0	0	0
Porphyromonadaceae	2203	0	0	0	0	0	1	0	0	0	0	0	0	0	0	0	0	0	0	0	0	0	0	0	0	0	0	0	0	0	0	0	0	0	0	0	0	0	0	0	0	0	0	0	0	0	0	0	0
Hallella	1987	0	0	0	0	0	0	0	0	0	0	0	0	0	0	0	0	0	0	0	0	1	0	0	0	0	1	0	0	0	0	0	0	0	0	0	0	0	0	0	0	0	0	0	0	0	0	0	0
Hallella	1924	0	0	0	0	0	0	0	0	0	0	0	0	0	0	0	0	0	0	0	0	0	0	0	0	0	0	0	0	0	0	0	0	0	0	0	0	0	0	0	0	0	0	0	0	0	0	0	0
Prevotella	47	0	7	2	0	1	0	0	2	0	1	0	1	4	3	7	8	0	0	0	4	7	1	0	0	4	3	4	3	0	3	0	4	4	3	0	0	14	0	7	15	2	2	0	1	0	0	3	0
Prevotella	1805	9	9	0	0	3	1	0	1	0	2	0	1	0	0	0	0	0	0	0	0	0	0	0	0	0	1	2	0	0	0	0	0	43	0	0	0	0	0	0	0	0	0	0	0	0	0	0	0
Prevotella	920	0	0	0	0	0	0	0	0	0	0	0	0	0	0	0	0	0	0	0	2	0	0	43	0	0	3	0	1	0	0	0	0	0	0	0	0	0	0	0	0	0	0	0	0	0	0	0	0
Prevotella	524	0	0	0	0	0	0	1	0	0	0	0	0	0	0	0	0	0	0	0	0	0	0	0	0	0	1	0	0	0	1	0	0	0	0	0	0	0	0	0	0	0	0	0	0	0	0	0	0
Prevotella	231	0	2	0	0	0	0	0	0	0	0	0	0	0	0	0	0	0	0	0	0	0	0	0	0	0	0	1	0	0	0	0	0	0	0	0	0	0	0	0	0	0	0	0	0	0	0	0	0
Prevotella	621	0	0	0	0	0	0	0	0	0	0	1	0	0	0	0	0	0	0	0	0	0	0	0	0	0	0	0	0	0	0	0	0	0	0	0	0	0	0	0	0	0	0	0	0	0	0	0	0
Prevotella	201	0	0	0	0	0	0	0	0	0	0	0	0	0	0	0	0	0	0	0	0	0	0	0	0	0	0	0	0	0	0	0	0	0	0	0	0	0	0	0	0	0	0	0	0	0	0	0	0
Prevotella	0	0	0	0	0	0	0	0	0	0	0	0	0	0	0	0	0	0	0	0	0	0	0	0	0	0	1	0	0	0	0	0	0	0	0	0	0	0	0	0	0	0	0	0	0	0	0	0	0
Prevotella	355	0	0	0	0	0	0	0	0	0	0	0	0	0	0	0	0	0	0	0	0	0	0	0	0	0	0	0	0	0	0	0	0	0	0	0	0	0	0	0	0	0	0	0	0	0	0	0	0
Prevotella	410	0	0	0	0	0	0	0	0	0	0	0	0	0	0	0	0	0	0	0	0	0	0	0	0	0	1	0	0	0	0	0	0	0	0	0	0	0	0	0	0	0	0	0	0	0	0	0	0
Prevotella	760	0	0	0	0	0	0	0	0	0	0	0	0	0	0	0	0	0	0	0	0	0	0	0	0	0	0	0	0	0	0	0	1	0	0	0	0	0	0	0	0	0	0	0	0	0	0	0	0
Prevotella	1740	0	0	0	0	0	0	0	0	0	0	0	0	0	0	0	0	0	0	0	0	0	0	0	0	0	0	0	1	0	0	0	0	0	0	0	0	0	0	0	0	0	0	0	0	0	0	0	0
Prevotella	1992	0	0	0	0	0	0	0	0	0	0	0	0	0	0	0	0	0	0	0	0	0	0	0	0	0	0	0	0	0	0	0	0	0	0	0	0	0	0	0	0	0	0	1	0	0	0	0	0
Prevotella	2314	0	0	0	0	0	0	0	0	0	0	0	0	0	0	0	0	0	0	0	0	0	0	1	0	0	0	0	0	0	0	0	0	0	0	0	0	0	0	0	0	0	0	0	0	0	0	0	0
Prevotellaceae	2344	0	1	0	0	0	0	0	2	0	1	0	0	0	0	0	0	0	0	0	5	9	0	0	0	0	4	3	5	0	0	0	0	0	0	0	0	0	0	3	13	0	0	0	0	0	0	6	0
Prevotellaceae	396	0	0	0	0	0	0	0	0	0	0	0	0	0	0	0	0	0	0	0	0	0	0	0	0	0	0	0	0	0	0	0	0	0	0	0	0	2	0	0	0	0	0	0	0	0	0	0	0
Prevotellaceae	1034	0	0	0	0	0	0	0	0	0	0	0	0	0	0	0	0	0	0	0	0	0	0	1	0	0	0	0	1	0	0	0	0	0	0	0	0	0	0	0	0	0	0	0	0	0	0	0	0
Prevotellaceae	2134	0	0	0	0	0	0	0	0	0	0	0	0	0	0	0	0	0	0	0	0	0	0	0	0	0	1	0	0	0	0	0	0	0	0	0	0	0	0	0	1	0	0	0	0	0	0	0	0
Prevotellaceae	161	0	0	0	0	0	0	0	0	0	0	0	0	0	0	0	0	0	0	0	0	0	0	0	0	0	0	0	0	0	0	0	0	0	0	0	0	0	0	0	0	0	0	0	0	0	0	0	0
Prevotellaceae	388	0	0	0	0	0	0	0	0	0	0	0	0	0	0	0	0	0	0	0	0	0	0	0	0	0	0	0	0	0	0	0	0	0	0	0	1	0	0	0	0	0	0	0	0	0	0	0	0
Prevotellaceae	460	0	0	0	0	0	0	0	0	0	0	0	0	0	0	0	0	0	0	0	0	1	0	0	0	0	0	0	0	0	0	0	0	0	0	0	0	0	0	0	0	0	0	0	0	0	0	0	0
Prevotellaceae	706	0	1	0	0	0	0	0	0	0	0	0	0	0	0	0	0	0	0	0	0	0	0	0	0	0	0	0	0	0	0	0	0	0	0	0	0	0	0	0	0	0	0	0	0	0	0	0	0
Prevotellaceae	820	0	0	0	0	0	0	0	0	0	0	1	0	0	0	0	0	0	0	0	0	0	0	0	0	0	0	0	0	0	0	0	0	0	0	0	0	0	0	0	0	0	0	0	0	0	0	0	0
Bacteroidales	294	0	0	0	0	0	0	0	0	0	0	0	0	0	0	0	0	0	0	0	0	0	0	0	0	0	0	0	0	0	0	0	0	0	0	0	0	0	0	0	0	0	0	0	0	0	0	0	0
Bacteroidales	823	0	0	0	0	0	0	0	0	0	0	0	0	0	0	0	0	0	0	0	0	0	0	0	0	0	0	0	0	0	0	0	0	0	0	0	0	0	0	0	0	0	0	0	0	0	0	0	0
Bacteroidales	1050	0	0	0	0	0	0	0	0	0	0	0	0	0	0	0	0	0	0	0	0	0	0	0	0	1	0	0	0	0	0	0	0	0	0	0	0	0	0	0	0	0	0	0	0	0	0	0	0
Bacteroidales	1199	0	0	0	0	0	0	0	0	0	0	0	0	0	0	0	0	0	0	0	0	0	0	0	0	0	0	0	0	0	0	0	0	0	0	0	0	0	0	0	0	0	0	0	0	0	0	0	0
Bacteroidales	1446	0	0	0	0	0	0	0	0	0	0	0	0	0	0	0	0	0	0	0	0	0	0	0	0	0	0	0	0	0	0	0	0	0	0	0	0	0	0	0	0	0	0	1	0	0	0	0	0
Bacteroidales	2058	0	0	0	0	0	0	0	0	0	0	0	0	0	0	0	0	0	0	0	0	0	0	0	0	0	0	0	0	0	0	0	0	0	0	0	0	0	0	0	0	0	0	0	0	0	0	0	0
Chryseobacterium	1310	0	0	0	0	0	0	0	0	0	1	0	0	0	0	0	0	0	0	0	0	0	0	0	0	0	0	0	0	0	0	0	0	0	0	0	0	0	0	0	0	0	0	0	0	0	0	0	0
Cloacibacterium	74	0	0	0	0	0	7	0	0	1	0	0	0	0	0	0	0	0	0	0	0	0	0	0	0	0	0	0	0	0	0	0	0	0	0	0	0	0	0	0	0	0	0	0	0	0	0	0	0
Flavobacterium	1391	0	0	0	0	0	0	0	0	0	0	0	0	0	0	0	0	0	0	0	0	0	0	0	0	0	0	0	0	0	0	0	0	0	0	0	0	0	0	0	0	0	0	0	0	0	0	0	0
Flavobacteriaceae	1044	0	0	0	0	0	0	0	0	10	0	0	0	0	0	0	0	0	0	0	0	0	0	0	0	0	0	0	0	0	0	0	0	0	0	0	0	0	0	0	0	0	0	0	0	0	0	0	0
Flavobacteriaceae	695	0	0	0	0	0	0	0	0	0	0	0	0	0	0	0	0	0	0	0	0	0	0	0	0	0	0	0	0	0	0	0	0	0	0	0	0	0	0	0	0	0	0	0	0	0	0	0	0
Flavobacteriaceae	1232	0	0	0	1	0	0	0	0	0	0	0	0	0	0	0	0	0	0	0	0	0	0	0	0	0	0	0	0	0	0	0	0	0	0	0	0	0	0	0	0	0	0	0	0	0	0	0	0
Terrimonas	276	0	0	0	0	0	0	0	1	2	3	0	1	6	2	0	0	0	1	0	1	0	0	0	0	0	0	0	0	0	0	0	0	0	0	0	0	0	0	0	0	0	0	0	0	0	0	0	0
Crenotrichaceae	1432	0	0	0	0	0	0	0	0	0	2	0	0	2	0	0	0	0	0	0	0	0	0	0	0	0	0	0	0	0	0	0	0	0	0	0	0	0	0	0	0	0	0	0	0	0	0	0	0
Spirosoma	1816	0	0	0	0	0	0	0	0	0	0	4	0	0	0	0	0	0	0	0	0	0	0	0	0	0	0	0	0	0	0	0	0	0	0	0	0	0	0	0	0	0	0	0	0	0	0	0	0
Spirosoma	1203	0	0	0	0	0	0	0	0	0	0	0	0	0	0	0	0	0	0	0	0	0	0	0	0	0	0	0	0	0	0	0	0	0	0	0	0	0	0	0	0	0	0	0	0	0	0	0	0
Pedobacter	317	0	0	0	0	0	0	0	0	0	0	0	0	0	0	0	0	0	0	0	0	0	0	0	0	0	0	0	0	0	0	0	0	0	0	0	0	0	0	0	0	0	0	0	0	0	0	0	0
Sphingobacterium	354	0	0	0	0	0	0	0	0	0	2	0	0	0	0	0	0	0	0	0	0	0	0	0	0	0	0	0	0	0	0	0	0	0	0	0	0	0	0	0	0	0	0	0	0	0	0	0	0
Sphingobacterium	428	1	0	0	0	0	0	0	0	0	0	0	0	0	0	0	0	0	0	0	0	0	0	0	0	0	0	0	0	0	0	0	0	0	0	0	0	0	0	0	0	0	0	0	0	0	0	0	0
Sphingobacterium	1092	0	0	0	0	0	0	0	0	0	0	0	0	0	0	0	0	0	0	0	0	0	0	0	0	0	0	1	0	0	0	0	0	0	0	0	0	0	0	0	0	0	0	0	0	0	0	0	0
Sphingobacteriales	1502	0	0	0	0	0	0	0	0	2	3	0	0	6	0	0	0	0	0	0	0	0	0	0	0	0	0	0	0	0	0	0	0	0	0	0	0	0	0	0	0	0	0	0	0	0	0	0	0
Bacteroidetes	1083	43	21	15	2	7	6	35	26	0	10	10	2	5	14	30	70	0	0	0	68	43	0	0	3	14	59	48	41	20	10	0	15	33	16	0	47	9	0	12	42	5	6	0	1	0	0	8	20
Bacteroidetes	571	0	0	0	0	0	0	0	2	4	6	0	10	10	5	1	0	3	3	0	0	0	0	0	0	0	0	0	0	0	0	0	0	0	0	0	0	0	0	0	0	0	0	0	0	0	0	0	0
Bacteroidetes	556	0	2	0	0	0	0	1	1	0	0	2	0	1	1	0	0	0	0	0	0	0	0	0	0	2	0	0	0	0	1	0	1	0	3	0	0	1	0	0	1	0	0	0	0	0	0	1	0
Bacteroidetes	1542	0	0	0	0	0	0	0	4	7	0	0	7	3	0	0	0	0	1	0	1	0	0	0	0	0	0	0	0	0	0	0	0	0	1	0	0	0	0	0	0	0	0	0	0	0	0	0	0
Bacteroidetes	1254	0	3	0	0	0	0	0	0	0	0	1	0	0	0	0	0	0	0	0	0	0	0	0	0	1	0	0	0	0	1	0	0	0	0	0	0	0	0	1	1	0	0	0	0	0	0	1	0
Bacteroidetes	1447	0	0	1	0	0	0	0	0	0	0	0	0	0	0	0	1	0	0	0	1	0	0	0	0	0	1	3	0	0	0	0	0	1	1	0	0	0	0	0	0	1	0	0	0	0	0	0	0
Bacteroidetes	2353	0	0	0	0	0	1	0	0	0	0	0	0	1	1	0	0	0	0	0	0	0	0	0	0	0	1	0	0	1	0	0	0	0	0	0	0	1	0	0	1	0	0	0	0	0	0	0	1
Bacteroidetes	1314	0	0	0	0	0	0	2	0	0	0	0	0	0	0	0	0	0	0	0	0	3	0	0	0	0	1	0	0	0	1	0	0	0	1	0	0	0	0	0	0	0	0	0	0	0	0	0	0
Bacteroidetes	2013	0	0	0	0	0	0	0	0	0	0	1	0	0	0	0	0	0	0	0	1	0	0	0	0	1	0	0	0	0	1	0	0	0	0	0	0	0	0	0	2	0	0	0	0	0	0	0	0
Bacteroidetes	1648	0	0	1	0	0	0	0	1	0	0	0	0	0	0	0	1	0	0	0	0	0	0	0	0	0	2	0	0	0	0	0	0	0	0	0	0	0	0	0	0	0	0	0	0	0	0	0	0
Bacteroidetes	1329	0	1	0	0	0	0	0	0	0	0	0	0	0	0	0	0	0	0	0	1	0	0	0	0	0	0	0	0	0	0	0	0	0	0	0	0	0	0	0	0	0	0	0	0	0	0	0	0
Bacteroidetes	1436	0	0	0	0	0	0	0	0	0	0	0	0	0	0	0	0	0	0	0	1	2	0	0	0	0	0	1	0	0	0	0	0	0	0	0	0	0	0	0	0	0	0	0	0	0	0	0	0
Bacteroidetes	20	0	0	0	0	0	0	0	0	2	0	0	0	0	0	0	0	0	0	0	0	0	0	0	0	0	0	0	0	0	0	0	0	0	0	0	0	0	0	0	0	0	0	0	0	0	0	0	0
Bacteroidetes	207	0	0	0	0	0	0	0	0	0	0	0	0	0	0	0	0	0	0	0	0	0	0	0	0	0	0	0	0	0	0	0	0	0	0	0	0	0	0	0	0	0	0	2	0	0	0	0	0
Bacteroidetes	652	0	0	0	0	0	0	0	0	0	0	0	0	0	0	0	0	0	0	0	0	0	0	0	0	0	0	0	1	0	0	0	0	0	1	0	0	0	0	0	0	0	0	0	0	0	0	0	0
Bacteroidetes	679	0	0	0	0	0	0	0	0	0	0	0	2	0	0	0	0	0	0	0	0	0	0	0	0	0	0	0	0	0	0	0	0	0	0	0	0	0	0	0	0	0	0	0	0	0	0	0	0
Bacteroidetes	1100	0	0	0	0	0	1	0	0	0	0	1	0	0	0	0	0	0	0	0	0	0	0	0	0	0	0	0	0	0	0	0	0	0	0	0	0	0	0	0	0	0	0	0	0	0	0	0	0
Bacteroidetes	1639	0	0	0	0	0	0	0	0	0	0	0	0	0	0	0	0	0	0	0	0	1	0	0	0	0	0	0	0	0	0	0	1	0	0	0	0	0	0	0	0	0	0	0	0	0	0	0	0
Bacteroidetes	1645	0	1	0	0	0	0	0	0	0	0	0	0	0	0	0	0	0	0	0	0	0	0	0	0	0	0	0	0	0	0	0	0	0	0	0	0	0	0	0	0	0	0	0	0	0	0	0	0
Bacteroidetes	14	0	0	0	0	0	0	0	0	0	0	0	0	0	0	0	0	0	0	0	0	0	0	0	0	0	0	0	1	0	0	0	0	0	0	0	0	0	0	0	0	0	0	0	0	0	0	0	0
Bacteroidetes	348	0	1	0	0	0	0	0	0	0	0	0	0	0	0	0	0	0	0	0	0	0	0	0	0	0	0	0	0	0	0	0	0	0	0	0	0	0	0	0	0	0	0	0	0	0	0	0	0
Bacteroidetes	353	0	0	0	0	0	0	0	0	0	0	0	0	0	0	0	0	0	0	0	0	1	0	0	0	0	0	0	0	0	0	0	0	0	0	0	0	0	0	0	0	0	0	0	0	0	0	0	0
Bacteroidetes	498	0	0	0	0	0	0	0	0	0	0	0	0	0	0	0	0	0	0	0	0	0	0	0	0	0	0	0	0	0	0	0	0	0	0	0	0	1	0	0	0	0	0	0	0	0	0	0	0
Bacteroidetes	697	0	0	0	0	0	0	0	0	0	0	0	0	0	0	0	0	0	0	0	0	0	0	0	0	0	0	0	0	0	0	0	0	0	0	0	0	0	0	0	1	0	0	0	0	0	0	0	0
Bacteroidetes	715	0	0	0	0	0	0	0	0	0	0	0	0	0	0	0	0	0	0	0	0	0	0	0	0	0	0	0	0	0	0	0	0	0	0	0	0	0	0	0	0	0	0	0	0	0	0	0	0
Bacteroidetes	731	0	0	0	0	0	0	0	0	0	0	0	0	0	0	0	0	0	0	0	0	0	0	0	0	0	0	0	0	0	0	0	1	0	0	0	0	0	0	0	0	0	0	0	0	0	0	0	0
Bacteroidetes	825	0	0	0	0	0	0	0	0	0	0	0	0	0	0	0	0	0	0	0	0	0	0	0	0	0	0	0	0	0	0	0	0	0	0	0	0	0	0	0	0	0	0	0	0	0	0	0	0
Bacteroidetes	857	0	0	0	0	0	0	0	0	0	0	0	0	0	0	0	0	0	0	0	0	0	0	0	0	0	0	0	0	0	0	0	0	0	0	0	0	0	0	0	0	0	0	0	0	0	0	0	0
Bacteroidetes	1506	0	0	0	0	0	0	0	0	0	0	0	0	0	0	0	0	0	0	0	0	0	0	0	0	0	0	0	0	0	0	0	0	0	0	0	0	0	0	0	0	0	0	0	0	0	0	0	0
Bacteroidetes	1673	0	0	0	0	0	0	0	0	0	0	0	0	0	0	0	0	0	0	0	0	0	0	0	0	0	0	0	0	0	0	0	0	0	0	0	0	0	0	0	1	0	0	0	0	0	0	0	0
Bacteroidetes	1705	0	0	0	0	0	1	0	0	0	0	0	0	0	0	0	0	0	0	0	0	0	0	0	0	0	0	0	0	0	0	0	0	0	0	0	0	0	0	0	0	0	0	0	0	0	0	0	0
Bacteroidetes	1772	0	0	0	0	0	0	0	0	0	0	0	0	0	0	0	1	0	0	0	0	0	0	0	0	0	0	0	0	0	0	0	0	0	0	0	0	0	0	0	0	0	0	0	0	0	0	0	0
Bacteroidetes	1827	0	0	0	0	0	0	0	0	0	0	0	0	0	0	0	0	0	0	0	0	1	0	0	0	0	0	0	0	0	0	0	0	0	0	0	0	0	0	0	0	0	0	0	0	0	0	0	0
Bacteroidetes	2280	0	0	0	0	0	0	0	0	0	0	0	0	0	0	0	0	0	0	0	0	0	0	0	0	0	0	0	0	0	0	0	0	0	0	0	0	0	0	0	0	0	0	0	0	0	0	0	0
Neochlamydia	258	0	0	0	0	0	0	0	0	0	0	0	0	0	0	0	0	0	0	0	0	0	0	0	0	0	0	0	0	0	1	0	0	0	0	0	0	0	0	0	0	0	0	0	0	0	0	0	0
Chloroplast	638	0	0	1	2	1	14	0	1	0	0	5	2	0	1	0	0	0	0	0	0	0	1	0	0	0	0	1	0	0	0	0	0	0	0	1	0	0	0	0	0	1	0	2	0	0	0	2	0
Chloroplast	1462	0	0	0	0	0	0	0	0	0	0	0	0	0	0	0	0	0	0	0	0	0	0	0	0	0	0	0	0	0	0	0	0	0	0	0	0	0	0	0	0	0	0	0	0	0	0	0	0
Chloroplast	821	0	0	0	0	0	0	0	0	0	0	0	0	0	0	0	0	0	0	0	0	0	1	0	0	0	0	0	0	0	0	0	0	0	0	0	0	0	0	0	0	0	0	0	0	0	0	0	0
Chloroplast	380	0	0	0	0	0	0	0	0	0	0	0	0	0	0	0	0	0	0	0	0	0	0	0	0	0	0	0	0	0	0	0	0	0	0	0	0	0	0	0	0	0	0	0	0	0	0	0	0
Chloroplast	1037	0	0	0	0	0	0	0	0	0	0	0	0	0	0	0	0	0	0	0	0	0	0	0	0	0	0	0	0	0	0	0	0	0	0	0	0	0	0	0	0	0	0	0	0	0	0	0	0
Chloroplast	1525	0	0	0	0	0	0	0	0	0	0	0	0	0	0	0	0	0	0	0	0	0	0	0	0	0	0	0	0	0	0	0	0	0	0	0	0	0	0	0	0	0	0	0	0	0	0	0	0
Chloroplast	2150	0	0	0	1	0	0	0	0	0	0	0	0	0	0	0	0	0	0	0	0	0	0	0	0	0	0	0	0	0	0	0	0	0	0	0	0	0	0	0	0	0	0	0	0	0	0	0	0
Chloroplast	1309	0	0	0	0	0	0	0	0	0	0	0	0	0	0	0	0	0	0	0	0	0	0	0	0	0	0	0	0	0	0	0	0	0	0	0	0	0	0	0	0	0	0	0	0	0	0	0	0
GpI	1431	0	0	0	0	0	0	0	0	0	0	0	0	0	0	0	0	0	0	0	0	0	0	0	0	0	0	0	0	0	1	0	0	0	0	0	0	0	0	0	0	0	0	0	0	0	0	0	0
Deinococcus	980	0	0	0	0	0	0	0	0	0	0	0	0	0	0	0	0	0	0	0	0	0	0	0	0	0	0	0	0	0	0	0	0	0	0	0	0	0	0	0	0	0	0	0	0	0	0	0	0
Deinococcus	1919	0	0	0	0	0	0	0	0	0	0	0	0	0	0	0	0	0	0	0	0	0	0	0	0	0	0	0	0	0	0	0	0	0	0	0	0	0	0	0	0	0	0	0	0	0	0	0	0
Bacillus	489	0	0	0	1	0	0	0	0	0	0	0	0	0	0	0	0	0	0	0	0	0	0	0	0	0	0	0	0	0	0	0	0	0	0	0	0	0	0	0	0	0	0	0	0	0	0	0	0
Bacillaceae	203	0	0	0	0	0	0	0	0	0	0	0	1	0	0	0	0	0	0	0	0	0	0	0	0	0	0	0	0	0	0	0	0	0	0	0	0	0	0	0	0	0	0	0	0	0	0	0	0
Bacillaceae	1682	0	0	0	0	0	0	0	0	0	0	0	0	0	0	0	0	0	0	0	0	0	0	0	0	0	0	0	0	0	0	0	0	0	0	0	0	0	0	0	0	0	0	0	0	0	0	0	0
Bacillaceae	2126	0	0	0	0	0	0	0	0	0	0	0	0	0	0	0	0	0	0	0	0	0	0	0	0	0	0	0	0	0	0	0	0	0	0	0	0	0	0	0	0	0	0	1	0	0	0	0	0
Bacillaceae	2127	0	0	0	0	0	0	0	0	0	0	0	0	0	0	0	0	0	0	0	0	0	0	0	0	0	0	0	0	0	0	0	0	0	0	0	0	0	0	0	0	0	0	0	0	0	0	0	0
Bacillaceae	1460	0	0	0	0	0	0	0	0	0	0	0	0	0	0	0	0	0	0	0	0	0	0	0	0	0	0	0	0	0	0	0	0	1	0	0	0	0	0	0	0	0	0	0	0	0	0	0	0
Gemella	1824	0	0	0	0	0	0	0	0	0	0	0	1	0	0	0	0	0	0	0	0	0	0	0	0	0	0	0	0	0	1	0	0	0	0	0	0	0	3	0	0	0	0	1	0	0	0	0	0
Paenibacillaceae	1794	0	0	0	0	0	0	0	0	0	0	0	0	0	1	0	0	0	0	0	0	0	0	0	0	0	0	0	0	0	1	0	0	1	0	11	0	0	0	0	0	0	0	0	0	0	0	0	0
Staphylococcus	738	0	21	0	146	38	81	8	30	22	14	28	82	7	7	10	5	115	49	4	0	0	5	0	2	0	3	9	3	9	146	107	26	60	13	96	4	15	8	60	1	19	1	235	1	133	109	14	92
Staphylococcus	1123	0	0	0	0	1	0	1	0	0	0	2	0	0	0	0	0	1	0	0	0	0	0	0	0	0	0	0	0	0	1	0	0	1	0	1	0	0	0	0	0	0	0	1	0	0	0	0	0
Staphylococcus	2322	0	0	0	0	1	0	0	0	1	1	0	1	0	0	0	0	0	0	0	0	0	0	0	0	0	0	0	0	0	0	0	1	0	0	1	0	0	0	0	0	0	0	1	0	0	0	0	1
Staphylococcus	575	0	0	0	1	0	0	0	0	0	0	0	0	0	0	0	0	0	0	0	0	0	0	0	0	0	0	0	0	0	0	1	0	0	0	0	0	0	0	0	0	0	0	1	0	0	0	0	0
Staphylococcus	1086	0	0	0	1	0	0	0	0	0	0	0	0	0	0	0	0	0	0	0	0	0	0	0	0	0	0	0	0	0	0	0	0	1	0	0	0	0	0	0	0	0	0	1	0	0	0	0	0
Staphylococcus	1397	0	0	0	0	0	0	0	0	0	0	0	0	0	0	0	0	0	0	1	0	0	0	0	0	0	0	0	0	0	0	0	0	0	0	0	0	0	0	0	0	0	0	0	0	1	0	0	0
Staphylococcus	729	0	0	0	0	0	0	0	0	0	0	0	0	0	0	0	0	0	0	0	0	0	0	0	0	0	0	0	0	0	0	1	0	0	0	0	0	0	0	0	0	0	0	0	0	0	0	0	0
Staphylococcus	1769	0	0	0	0	0	0	0	0	0	0	0	0	0	0	0	0	0	0	0	0	0	0	0	0	0	0	0	0	0	0	0	0	0	0	0	0	0	0	0	0	0	0	1	0	0	0	0	0
Staphylococcus	2362	0	0	0	0	0	0	0	0	0	0	0	0	0	0	0	0	0	0	0	0	0	0	0	0	0	0	0	0	0	0	0	0	0	0	0	0	0	0	0	0	0	0	0	0	0	0	0	0
Staphylococcus	152	0	0	0	0	0	0	0	0	0	0	0	0	0	0	0	0	0	0	0	0	0	0	0	0	0	0	0	0	0	0	0	0	0	0	0	0	0	0	0	0	0	0	0	0	0	0	0	0
Staphylococcus	412	0	0	0	0	0	0	0	0	0	0	0	1	0	0	0	0	0	0	0	0	0	0	0	0	0	0	0	0	0	0	0	0	0	0	0	0	0	0	0	0	0	0	0	0	0	0	0	0
Staphylococcus	590	0	0	0	0	0	0	0	0	0	0	0	0	0	0	0	0	0	0	0	0	0	0	0	0	0	0	0	0	0	0	0	0	0	0	0	0	0	0	0	0	0	0	0	0	0	0	0	0
Staphylococcus	909	0	0	0	0	0	0	0	0	0	0	0	0	0	0	0	0	0	0	0	0	0	0	0	0	0	0	0	0	0	0	0	0	0	0	0	0	0	0	0	0	0	0	0	0	0	0	0	0
Staphylococcus	1338	0	0	0	0	0	0	0	0	0	0	0	0	0	0	0	0	0	0	0	0	0	0	0	0	0	0	0	0	0	0	0	0	0	0	0	0	0	0	0	0	0	0	0	0	0	0	0	0
Staphylococcaceae	2237	0	0	0	1	0	1	1	0	0	0	0	0	0	0	0	0	0	0	0	0	0	0	0	0	0	0	0	0	0	0	2	0	0	0	0	0	0	0	0	0	0	0	0	0	3	0	0	2
Staphylococcaceae	2228	0	0	0	0	0	0	0	2	0	0	0	0	0	0	0	0	1	0	0	0	0	0	0	0	0	0	0	0	0	0	0	0	0	0	0	0	0	0	0	0	0	0	0	0	0	0	0	0
Staphylococcaceae	1586	0	0	0	0	0	0	0	0	0	0	0	0	0	0	0	0	0	1	0	0	0	0	0	0	0	0	0	0	0	0	0	0	0	0	0	0	0	0	0	0	0	0	0	0	1	0	0	0
Staphylococcaceae	420	0	0	0	0	0	0	0	0	0	0	0	0	0	0	0	0	0	0	0	0	0	0	0	0	0	0	0	0	0	0	0	0	0	0	0	0	0	0	0	0	0	0	0	0	0	0	0	0
Staphylococcaceae	1536	0	0	0	0	0	0	0	0	0	0	0	0	0	0	0	0	0	0	0	0	0	0	0	0	0	0	0	0	0	0	0	0	0	0	0	0	0	0	0	0	0	0	0	0	0	0	0	0
Staphylococcaceae	1633	0	0	0	0	0	0	0	0	0	0	0	0	0	0	0	0	0	0	0	0	0	0	0	0	0	0	0	0	0	0	0	0	0	0	0	0	0	0	0	0	0	0	0	0	0	0	0	0
Staphylococcaceae	208	0	0	0	0	0	0	0	0	0	0	0	0	0	0	0	0	0	0	0	0	0	0	0	0	0	0	0	0	0	0	0	0	0	0	0	0	0	0	0	0	0	0	0	0	0	0	0	0
Staphylococcaceae	620	0	0	0	0	0	0	0	0	0	0	0	0	0	0	0	0	0	0	0	0	0	0	0	0	0	0	0	0	0	0	0	0	0	0	0	0	0	0	0	0	0	0	0	0	0	0	0	0
Staphylococcaceae	1327	0	0	0	0	0	0	0	0	0	0	0	0	0	0	0	0	0	0	0	0	0	0	0	0	0	0	0	0	0	0	0	0	0	0	0	0	0	0	0	0	0	0	0	0	0	0	0	0
Staphylococcaceae	2256	0	0	0	0	0	0	0	0	0	0	0	0	0	0	0	0	0	0	0	0	0	0	0	0	0	0	0	0	0	0	0	0	0	0	0	0	0	0	0	0	0	0	1	0	0	0	0	0
Thermoactinomyces	965	0	0	0	0	0	0	0	0	0	0	0	0	0	0	0	0	0	0	0	0	0	0	0	0	0	0	0	0	0	0	0	0	0	0	0	0	0	0	1	0	0	0	0	0	0	0	0	0
Bacillales	30	0	0	0	0	0	0	0	0	0	0	0	0	0	0	0	0	0	0	93	0	0	0	0	0	0	0	0	0	0	0	0	0	0	0	0	0	0	0	0	0	0	0	0	0	0	0	0	0
Bacillales	449	0	0	0	0	0	0	0	0	0	0	1	2	0	0	0	0	0	0	0	0	0	0	0	0	0	0	0	0	0	0	0	0	0	0	0	0	0	0	0	0	0	0	0	0	0	0	0	0
Bacillales	613	0	0	0	0	0	0	0	0	0	0	0	0	0	0	0	0	0	0	0	0	0	0	0	0	0	0	0	0	0	0	0	0	2	0	0	0	0	0	0	0	0	0	0	0	0	0	0	0
Bacillales	2248	0	0	0	0	0	0	0	0	0	0	0	0	0	0	0	0	0	1	0	0	0	0	0	0	0	0	0	0	0	1	1	0	0	0	1	0	0	0	1	0	0	0	0	0	0	0	0	0
Bacillales	1668	0	0	0	1	0	0	0	0	0	0	0	1	0	0	0	0	0	0	0	0	0	0	0	0	0	0	0	0	0	1	0	0	0	0	0	0	0	0	0	0	0	0	1	0	0	0	0	0
Bacillales	1757	0	0	0	1	0	0	0	0	0	0	0	0	0	0	0	0	0	0	0	0	0	0	0	0	0	0	0	0	0	0	0	0	0	0	1	0	0	0	0	0	0	0	0	0	3	0	0	0
Bacillales	1346	0	0	0	0	0	0	0	0	0	0	0	0	0	0	0	0	1	0	0	0	0	0	0	0	0	0	0	0	0	0	0	0	0	0	0	0	0	0	1	0	0	0	0	0	0	1	0	0
Bacillales	1386	0	0	0	0	0	0	0	0	0	0	0	0	0	0	0	0	0	0	4	0	0	0	0	0	0	0	0	0	0	0	0	0	0	0	0	0	0	0	0	0	0	0	0	0	0	0	0	0
Bacillales	2249	0	0	0	0	0	0	0	0	0	0	0	0	0	0	0	0	0	0	0	0	0	0	0	0	0	0	0	0	0	0	0	0	0	0	0	0	0	0	0	0	0	0	0	0	1	0	0	0
Bacillales	121	0	0	0	0	0	0	0	0	0	0	0	0	0	0	0	0	0	0	0	0	0	0	0	0	0	0	0	0	0	0	0	0	0	0	0	0	0	0	0	0	0	0	0	0	0	0	0	0
Bacillales	149	0	0	0	0	0	0	0	0	0	0	0	0	0	0	0	1	0	0	0	0	0	0	0	0	0	0	0	0	0	0	0	0	0	0	0	0	0	0	0	0	0	0	0	0	0	0	0	0
Bacillales	379	0	0	0	0	0	0	0	0	0	0	0	0	0	0	0	0	0	0	0	0	0	0	0	0	0	0	0	0	0	1	0	0	0	0	0	0	0	0	0	0	0	0	0	0	0	0	0	0
Bacillales	451	0	0	0	0	0	0	0	0	0	0	0	0	0	0	0	0	0	0	2	0	0	0	0	0	0	0	0	0	0	0	0	0	0	0	0	0	0	0	0	0	0	0	0	0	0	0	0	0
Bacillales	494	0	0	0	0	0	0	0	0	0	0	0	0	0	0	0	0	0	0	0	0	0	0	0	0	0	0	0	0	0	0	0	0	0	0	0	0	0	0	0	0	0	0	0	0	0	0	0	0
Bacillales	762	0	0	0	0	0	0	0	0	0	0	0	0	0	0	0	0	0	0	0	0	0	0	0	0	0	0	0	0	0	0	0	0	1	0	0	0	0	0	0	0	0	0	0	0	0	0	0	0
Bacillales	1576	0	0	0	0	0	0	0	0	0	0	0	0	0	1	0	0	0	0	0	0	0	0	0	0	0	0	0	0	0	0	0	0	1	0	0	0	0	0	0	0	0	0	0	0	0	0	0	0
Bacillales	602	0	0	0	0	0	0	0	0	0	0	0	0	0	0	0	0	0	0	1	0	0	0	0	0	0	0	0	0	0	0	0	0	0	0	0	0	0	0	0	0	0	0	0	0	0	0	0	0
Bacillales	685	0	0	0	0	0	0	0	0	0	0	0	0	0	1	0	0	0	0	0	0	0	0	0	0	0	0	0	0	0	0	0	0	0	0	0	0	0	0	0	0	0	0	0	0	0	0	0	0
Bacillales	860	0	0	0	0	0	0	0	0	0	0	0	0	0	0	0	0	0	0	0	0	0	0	0	0	0	0	0	0	0	1	0	0	0	0	0	0	0	0	0	0	0	0	0	0	0	0	0	0
Bacillales	1416	0	0	0	0	0	0	0	0	0	0	0	0	0	0	0	0	0	0	0	0	0	0	0	0	0	0	0	0	0	0	0	0	0	0	0	0	0	0	0	0	0	0	0	0	0	0	0	0
Abiotrophia	1846	0	0	0	0	0	0	0	0	0	0	0	0	0	0	0	0	0	0	0	0	0	0	0	0	0	0	0	1	0	3	0	0	0	0	0	0	0	0	0	0	0	0	0	0	0	0	0	0
Aerococcus	2149	0	0	0	0	0	1	0	0	0	0	0	0	0	0	0	0	0	0	0	0	0	0	0	0	0	0	0	0	0	0	0	0	0	0	0	0	0	0	0	0	0	0	0	0	0	0	0	0
Ignavigranum	563	0	0	0	1	0	0	0	0	0	0	0	0	0	0	0	0	0	0	0	0	0	0	0	0	0	0	0	0	6	1	0	0	0	3	0	0	0	0	0	0	0	0	0	0	0	0	0	0
Aerococcaceae	1906	0	1	2	2	4	3	0	6	0	16	0	1	0	0	0	0	0	27	3	0	1	0	0	11	0	1	2	1	19	2	0	1	3	11	0	0	2	1	0	0	0	0	0	4	0	0	0	0
Aerococcaceae	663	0	0	0	0	0	0	0	0	0	0	0	0	0	0	0	0	0	1	0	0	0	0	0	0	0	0	0	0	0	0	0	1	0	0	0	0	0	0	0	0	0	0	0	0	0	0	0	0
Aerococcaceae	1154	0	0	0	0	0	0	0	0	0	0	0	0	0	0	0	0	0	0	0	0	0	0	0	0	0	0	0	0	2	0	0	0	0	0	0	0	0	0	0	0	0	0	0	0	0	0	0	0
Aerococcaceae	2262	0	0	0	0	0	0	0	0	1	0	0	0	0	0	0	0	0	0	0	0	0	0	0	0	0	0	0	0	1	0	0	0	0	0	0	0	0	0	0	0	0	0	0	0	0	0	0	0
Aerococcaceae	141	0	0	0	0	0	0	0	0	0	0	0	0	0	0	0	0	0	0	0	0	0	0	0	0	0	0	0	0	0	0	0	0	0	0	0	0	0	0	0	0	0	0	0	0	0	0	0	0
Aerococcaceae	238	0	0	0	0	0	0	0	0	0	0	0	0	0	0	0	0	0	0	0	0	0	0	0	0	0	0	0	0	0	0	0	0	0	0	0	0	0	0	0	0	0	0	0	0	0	0	0	0
Aerococcaceae	1026	0	0	0	0	0	0	0	0	0	0	0	0	0	0	0	0	0	0	0	0	0	0	0	0	0	0	0	0	1	0	0	0	0	0	0	0	0	0	0	0	0	0	0	0	0	0	0	0
Aerococcaceae	1230	0	0	0	0	0	0	0	0	0	0	0	0	0	0	0	0	0	1	0	0	0	0	0	0	0	0	0	0	0	0	0	0	0	0	0	0	0	0	0	0	0	0	0	0	0	0	0	0
Aerococcaceae	1239	0	0	0	0	0	0	0	0	0	0	0	0	0	0	0	0	0	0	0	0	0	0	0	1	0	0	0	0	0	0	0	0	0	0	0	0	0	0	0	0	0	0	0	0	0	0	0	0
Aerococcaceae	1263	0	0	0	0	0	0	0	0	1	0	0	0	0	0	0	0	0	0	0	0	0	0	0	0	0	0	0	0	0	0	0	0	0	0	0	0	0	0	0	0	0	0	0	0	0	0	0	0
Aerococcaceae	1293	0	0	0	0	0	0	0	0	0	0	0	0	0	0	0	0	0	0	1	0	0	0	0	0	0	0	0	0	0	0	0	0	0	0	0	0	0	0	0	0	0	0	0	0	0	0	0	0
Aerococcaceae	1742	0	0	0	0	0	0	0	0	0	0	0	0	0	0	0	0	0	0	0	0	0	0	0	0	0	0	0	0	0	0	0	0	0	0	0	0	0	0	0	0	0	0	0	0	0	0	0	0
Aerococcaceae	2182	0	0	0	0	0	0	0	0	0	0	0	0	0	0	0	0	0	0	0	0	0	0	0	1	0	0	0	0	0	0	0	0	0	0	0	0	0	0	0	0	0	0	0	0	0	0	0	0
Aerococcaceae	2364	0	0	0	0	0	0	0	0	0	0	0	0	0	0	0	0	0	1	0	0	0	0	0	0	0	0	0	0	0	0	0	0	0	0	0	0	0	0	0	0	0	0	0	0	0	0	0	0
Dolosigranulum	268	0	0	0	0	0	0	0	0	0	0	0	0	0	0	0	0	0	0	0	0	0	0	0	0	0	0	0	0	0	0	0	0	0	0	0	0	0	0	0	0	0	0	0	0	0	0	0	0
Dolosigranulum	325	0	0	0	0	0	0	0	0	0	0	0	0	0	0	0	0	0	0	0	0	0	0	0	0	0	0	0	0	0	0	0	0	0	0	0	0	0	0	0	0	0	0	0	0	0	0	0	0
Isobaculum	1632	0	0	0	0	0	0	0	0	0	0	0	0	0	0	0	0	0	0	0	0	0	0	0	0	0	0	0	0	0	0	0	0	0	0	0	0	0	0	0	0	0	0	0	0	0	0	0	0
Carnobacteriaceae	649	0	0	0	0	0	0	0	0	0	0	0	0	0	0	0	0	0	0	0	0	0	0	0	0	0	0	0	0	0	0	0	0	0	0	0	0	0	0	0	0	0	0	0	0	0	0	0	0
Granulicatella	554	0	0	0	0	0	0	0	2	0	0	0	0	0	0	0	0	0	0	0	0	0	0	0	0	0	0	0	0	0	0	0	0	0	0	0	0	0	0	0	0	0	0	0	0	0	0	0	0
Carnobacteriaceae	8	0	0	0	0	0	0	0	0	0	0	0	0	0	0	1	0	0	0	0	0	0	0	0	0	0	0	0	0	0	0	0	0	0	0	0	0	0	0	0	0	0	0	0	0	0	0	0	0
Carnobacteriaceae	1152	0	0	0	0	0	0	0	0	0	0	0	0	0	0	1	0	0	0	0	0	0	0	0	0	0	0	0	0	0	0	0	0	0	0	0	0	0	0	0	0	0	0	0	0	0	0	0	0
Carnobacteriaceae	1472	0	0	0	0	0	0	0	0	0	0	0	0	0	0	0	0	0	0	0	0	0	0	0	0	0	0	0	0	0	0	0	0	0	0	0	0	0	0	0	0	0	0	0	0	0	0	0	0
Lactobacillus	2181	0	0	0	0	0	0	0	0	0	0	0	0	0	0	0	0	0	0	0	0	0	0	0	0	0	0	0	0	0	0	0	0	0	0	0	0	0	0	0	0	0	0	0	0	0	0	0	0
Lactobacillaceae	1302	0	0	0	0	0	0	0	0	0	0	0	0	0	0	0	0	0	0	0	0	0	1	0	0	0	0	0	0	0	0	0	0	0	0	0	0	0	0	0	0	0	0	0	0	0	0	0	0
Leuconostoc	1196	0	0	0	0	0	0	0	0	0	1	0	0	0	0	0	0	0	0	0	0	0	0	0	0	0	0	0	0	0	0	0	0	0	0	0	0	0	0	0	0	0	0	0	0	0	0	0	0
Weissella	1000	0	0	0	0	0	0	0	0	0	0	2	0	0	0	0	0	0	0	0	0	0	0	0	0	0	0	0	0	0	0	0	0	0	0	0	0	0	0	0	0	0	0	0	0	0	0	0	0
Lactococcus	366	0	0	0	0	0	0	0	0	0	0	0	0	0	0	0	0	0	0	0	0	0	0	0	0	0	0	0	0	0	0	0	0	0	0	0	0	0	0	0	0	0	0	0	0	0	0	0	0
Streptococcus	1259	0	0	0	0	0	0	0	1	0	4	5	5	3	0	0	0	1	0	0	0	0	1	0	0	0	0	0	0	0	12	0	0	0	0	0	0	0	3	1	0	0	0	3	1	0	0	0	0
Streptococcus	1003	0	0	0	0	0	0	0	0	0	0	0	0	0	1	0	0	0	0	0	0	0	0	0	0	0	0	0	0	0	0	37	0	0	0	0	0	0	0	0	0	0	0	0	0	0	0	0	0
Streptococcus	764	0	0	0	0	0	0	0	0	0	0	1	1	3	0	0	0	0	0	0	0	0	0	0	0	0	0	0	0	0	2	0	0	0	2	0	0	1	2	0	0	0	0	3	0	0	0	0	0
Streptococcus	2155	0	0	0	0	0	0	0	0	0	0	1	1	0	0	0	0	0	0	0	2	0	0	0	0	0	0	0	0	0	1	0	0	0	1	0	0	0	0	0	0	0	0	1	0	0	0	0	0
Streptococcus	2274	0	0	0	0	0	0	0	0	0	0	0	1	0	0	0	0	0	0	0	0	0	0	0	0	0	0	0	0	0	0	0	0	0	0	0	0	0	0	0	0	0	0	0	0	0	0	0	0
Streptococcus	2297	0	0	0	0	0	0	0	0	0	0	0	0	0	0	0	0	0	0	0	0	0	0	0	0	0	0	0	0	0	0	0	0	0	0	0	0	0	0	0	0	0	0	0	0	0	0	0	0
Lactobacillales	1286	0	18	0	1	8	2	0	4	0	9	0	2	0	0	0	0	0	0	0	0	0	0	0	0	0	2	2	0	0	0	27	0	0	0	0	0	0	0	0	0	0	0	0	0	0	0	0	0
Lactobacillales	2335	0	0	0	0	0	0	0	0	0	0	0	0	4	9	23	0	0	0	0	0	0	0	0	0	0	0	1	0	0	1	0	0	0	0	0	0	1	0	0	0	0	0	0	0	0	0	0	0
Lactobacillales	892	0	0	0	0	0	0	0	0	0	0	0	1	0	0	0	0	0	0	0	0	0	0	0	0	0	0	0	0	0	0	0	0	0	0	0	0	0	0	0	0	0	0	0	0	0	0	0	0
Lactobacillales	101	0	0	0	0	0	0	0	0	0	0	0	0	0	0	0	0	0	0	0	0	0	0	0	0	0	0	1	0	0	0	0	0	0	0	0	0	0	0	0	0	0	0	0	0	0	0	0	0
Lactobacillales	42	0	1	0	0	0	0	0	0	0	0	0	0	0	0	0	0	0	0	0	0	0	0	0	0	0	0	0	0	0	0	0	0	0	0	0	0	0	0	0	0	0	0	0	0	0	0	0	0
Lactobacillales	66	0	0	0	0	0	0	0	0	0	0	0	0	0	0	1	0	0	0	0	0	0	0	0	0	0	0	0	0	0	0	0	0	0	0	0	0	0	0	0	0	0	0	0	0	0	0	0	0
Lactobacillales	166	0	0	0	0	0	0	0	0	0	0	0	0	0	0	0	0	1	0	0	0	0	0	0	0	0	0	0	0	0	0	0	0	0	0	0	0	0	0	0	0	0	0	0	0	0	0	0	0
Lactobacillales	791	0	0	0	0	0	0	0	0	0	0	0	0	0	0	0	0	0	0	0	0	0	0	0	0	0	0	0	0	0	0	0	0	0	0	0	0	0	0	0	0	0	0	0	0	0	0	0	0
Lactobacillales	886	0	0	0	0	0	0	0	0	0	0	0	0	0	0	0	0	0	0	0	0	0	0	0	0	0	0	0	0	0	0	1	0	0	0	0	0	0	0	0	0	0	0	0	0	0	0	0	0
Lactobacillales	1828	0	0	0	0	0	0	0	0	0	0	0	0	0	0	1	0	0	0	0	0	0	0	0	0	0	0	0	0	0	0	0	0	0	0	0	0	0	0	0	0	0	0	0	0	0	0	0	0
Lactobacillales	1886	0	0	0	0	0	0	0	0	0	0	0	0	0	0	1	0	0	0	0	0	0	0	0	0	0	0	0	0	0	0	0	0	0	0	0	0	0	0	0	0	0	0	0	0	0	0	0	0
Lactobacillales	2039	0	0	0	0	0	0	0	0	0	0	0	0	0	0	0	0	0	0	0	0	0	0	0	0	0	0	0	0	0	0	0	0	0	0	0	0	0	0	0	0	0	0	0	0	0	0	0	0
Lactobacillales	2276	0	0	0	0	0	0	0	0	0	0	0	0	0	0	0	0	0	0	0	0	0	0	0	0	0	0	0	0	0	0	0	0	0	0	0	0	0	0	0	0	0	0	0	0	0	0	0	0
Bacilli	1400	0	0	0	4	0	2	0	0	0	0	0	1	1	2	0	0	2	0	0	0	0	0	0	0	0	0	0	0	0	6	3	1	1	0	2	0	0	0	0	0	0	0	5	0	2	4	0	0
Bacilli	1912	0	0	0	0	0	0	0	0	0	0	0	0	0	0	1	0	2	0	0	0	0	0	0	0	0	0	0	0	1	0	0	0	0	0	0	0	0	0	0	0	0	0	0	0	0	0	0	0
Bacilli	1144	0	0	0	0	0	0	0	0	0	0	0	0	0	0	0	0	0	0	0	0	0	0	0	0	0	0	0	0	0	0	5	0	0	0	0	0	0	0	0	0	0	0	0	0	0	0	0	0
Bacilli	2008	0	0	0	0	0	0	0	0	0	0	0	0	0	0	0	0	0	0	0	0	0	0	0	0	0	0	0	0	0	0	0	0	0	0	0	0	0	0	0	0	0	0	1	0	0	0	0	0
Bacilli	422	0	0	0	0	0	0	0	0	0	0	0	0	0	0	0	0	0	0	0	0	0	0	0	0	0	0	0	0	0	0	2	0	0	0	1	0	0	0	0	0	0	0	0	0	0	1	0	0
Bacilli	519	0	0	0	1	0	1	0	0	0	0	0	0	0	0	0	0	0	0	0	0	0	0	0	0	0	0	0	0	0	0	0	0	0	0	0	0	0	0	0	0	0	0	0	0	0	0	0	1
Bacilli	716	0	0	0	0	0	0	0	0	0	0	0	0	0	0	0	0	0	0	0	0	0	0	0	1	0	0	0	0	0	0	1	0	0	0	0	0	0	0	0	0	1	0	0	0	0	0	0	0
Bacilli	1481	0	0	0	0	0	0	0	0	0	0	0	0	0	0	0	0	0	0	0	0	0	0	0	0	0	0	0	0	0	0	4	0	0	0	0	0	0	0	0	0	0	0	0	0	0	0	0	0
Bacilli	2078	0	0	0	0	0	0	0	0	0	0	0	0	0	0	0	0	0	0	0	0	0	0	0	0	0	0	0	0	1	0	2	0	0	0	0	0	0	0	0	0	0	0	0	0	0	0	0	0
Bacilli	29	0	0	0	0	0	0	0	0	0	0	0	0	0	0	1	0	0	0	0	0	0	0	0	0	0	0	0	0	0	0	0	0	0	0	0	0	0	0	0	0	0	0	0	0	0	0	0	0
Bacilli	198	0	0	0	0	0	0	0	0	0	0	0	0	0	0	0	0	0	0	0	0	0	0	0	0	0	0	0	0	0	0	1	0	0	0	0	0	0	0	0	0	0	0	0	0	0	0	0	0
Bacilli	492	0	0	0	0	0	0	0	0	0	0	0	0	0	0	0	0	0	0	0	0	0	0	0	0	0	0	0	0	0	0	0	0	0	0	0	0	0	0	0	0	0	0	0	0	0	1	1	0
Bacilli	1009	0	0	0	0	0	0	0	0	0	0	0	1	0	0	0	0	0	0	0	0	0	0	0	0	0	0	0	0	0	0	0	0	0	0	0	0	0	0	0	0	0	0	0	0	0	0	0	0
Bacilli	1222	0	0	0	1	0	1	0	0	0	0	0	0	0	0	0	0	0	0	0	0	0	0	0	0	0	0	0	0	0	0	0	0	0	0	0	0	0	0	0	0	0	0	0	0	0	0	0	0
Bacilli	2060	0	0	0	0	0	0	0	0	0	0	0	0	0	0	0	0	0	0	0	0	0	0	0	0	0	0	0	0	0	0	0	0	0	0	1	0	0	0	0	0	0	0	0	0	0	0	0	0
Bacilli	2218	0	0	0	0	0	0	0	0	0	0	0	0	0	0	0	0	0	0	0	0	0	0	0	0	0	0	0	0	0	1	0	0	0	0	0	0	0	0	0	0	0	0	0	0	0	0	0	0
Bacilli	346	0	0	0	0	0	0	0	0	0	0	0	0	0	0	0	0	0	0	0	0	0	0	0	0	0	0	0	0	0	0	0	0	0	0	0	0	0	0	0	0	0	0	0	0	0	0	0	1
Bacilli	482	0	0	0	0	0	0	0	0	0	0	0	0	0	0	0	0	0	0	0	0	0	0	0	0	0	0	0	0	0	0	1	0	0	0	0	0	0	0	0	0	0	0	0	0	0	0	0	0
Bacilli	546	0	0	0	0	0	0	0	0	0	0	0	0	0	0	0	0	0	0	0	0	0	0	0	0	0	0	0	0	0	0	0	0	0	0	0	0	0	0	0	0	0	0	0	0	0	0	0	0
Bacilli	719	0	0	0	0	0	0	0	0	0	0	0	0	0	0	0	0	0	0	0	0	0	0	0	0	0	0	0	0	0	0	1	0	0	0	0	0	0	0	0	0	0	0	0	0	0	0	0	0
Bacilli	793	0	0	0	0	0	0	0	0	0	0	0	0	0	0	0	0	0	0	1	0	0	0	0	0	0	0	0	0	0	0	0	0	0	0	0	0	0	0	0	0	0	0	0	0	0	0	0	0
Bacilli	1078	0	0	0	0	0	0	0	0	0	0	0	0	0	0	0	0	0	0	0	0	0	0	0	0	0	0	1	0	0	0	0	0	0	0	0	0	0	0	0	0	0	0	0	0	0	0	0	0
Bacilli	1128	0	0	0	0	0	0	0	0	0	0	0	0	0	0	0	0	0	0	0	0	0	0	0	0	0	0	0	0	0	0	0	0	0	0	0	0	0	0	0	0	0	0	0	0	0	0	0	0
Bacilli	1625	0	0	0	0	0	0	0	0	0	0	0	0	0	0	0	0	0	0	0	0	0	0	0	0	0	0	0	0	0	0	0	0	0	0	0	0	0	0	0	0	0	0	0	0	0	0	0	0
Bacilli	1725	0	0	0	0	0	0	0	0	0	0	0	0	0	0	0	0	0	0	0	0	0	0	0	0	0	0	0	0	0	0	0	0	0	0	0	0	0	0	0	0	0	0	1	0	0	0	0	0
Bacilli	1913	0	0	0	0	0	0	0	0	0	0	0	0	0	0	0	0	0	0	0	0	0	0	0	0	0	0	0	0	0	0	0	0	0	0	0	0	0	0	0	0	0	0	0	0	0	0	0	0
Bacilli	2075	0	0	0	0	0	0	0	0	0	0	0	0	0	0	0	0	0	0	0	0	0	0	0	0	0	0	0	0	0	0	0	0	0	0	0	0	0	0	0	0	0	0	0	0	0	0	0	0
Bacilli	2120	0	0	0	0	0	0	0	0	0	0	0	0	0	0	0	0	0	0	0	0	0	0	0	0	0	0	0	0	0	0	0	0	0	0	0	0	0	0	0	0	0	0	0	0	0	0	0	0
Bacilli	2168	0	0	0	0	0	0	0	0	0	0	0	0	0	0	0	0	0	0	0	0	0	0	0	0	0	0	0	0	0	0	0	0	0	0	0	0	0	0	0	0	0	0	0	0	0	0	0	0
Bacilli	2188	0	0	0	0	0	0	0	0	0	0	0	0	0	0	0	0	0	0	0	0	0	0	0	0	0	0	0	0	1	0	0	0	0	0	0	0	0	0	0	0	0	0	0	0	0	0	0	0
Bacilli	2304	0	0	0	0	0	0	0	0	0	0	0	0	0	0	0	0	0	0	0	0	0	0	0	0	0	0	0	0	0	0	1	0	0	0	0	0	0	0	0	0	0	0	0	0	0	0	0	0
Anaerococcus	924	8	39	28	17	53	26	16	21	4	16	6	38	5	8	22	4	65	32	8	0	1	19	11	12	1	2	5	8	14	1	0	5	3	10	8	4	60	0	30	2	101	19	2	13	5	0	54	26
Anaerococcus	1702	56	1	55	5	14	26	9	11	2	18	0	36	12	3	24	5	31	9	31	7	2	63	19	59	0	10	16	14	40	10	0	7	7	21	57	1	36	0	3	2	10	1	0	29	0	0	11	2
Anaerococcus	169	0	0	42	0	1	2	1	2	6	8	0	0	1	0	0	0	0	3	7	0	0	82	0	3	0	2	2	1	10	7	0	2	0	1	0	0	15	0	0	0	2	0	0	3	3	0	0	0
Anaerococcus	1704	0	3	1	50	0	0	3	4	0	10	0	1	1	0	0	0	0	0	23	0	0	2	0	2	0	0	0	0	2	0	0	0	0	1	0	0	3	3	0	0	0	2	0	2	0	0	1	16
Anaerococcus	2194	0	1	0	0	4	4	0	3	0	1	0	12	0	1	1	1	0	0	0	0	0	1	0	11	0	1	3	0	1	0	0	1	0	3	0	0	5	3	10	0	28	1	0	0	0	0	13	1
Anaerococcus	529	11	6	0	61	1	0	10	1	0	1	0	0	6	8	11	1	0	0	0	0	0	0	2	4	0	2	0	0	0	1	13	0	2	3	0	1	0	0	0	6	1	4	0	0	0	0	0	1
Anaerococcus	771	0	0	11	0	4	1	3	1	0	3	1	4	0	0	0	0	0	4	1	0	0	8	0	2	0	0	3	2	10	0	0	0	1	2	0	0	2	0	4	0	0	1	0	13	1	0	1	0
Anaerococcus	212	4	6	0	1	3	4	36	6	0	1	4	1	1	0	4	14	2	0	4	0	0	0	1	3	0	1	2	0	0	0	0	1	1	0	4	6	0	0	2	7	1	4	0	0	0	0	0	0
Anaerococcus	1258	0	1	0	0	0	2	14	2	0	0	0	1	0	0	0	0	0	3	1	0	0	0	0	1	0	0	0	2	3	0	0	0	0	0	0	0	0	0	2	4	0	0	0	0	0	0	1	2
Anaerococcus	1271	0	0	0	0	3	0	0	0	0	1	0	0	0	0	0	0	0	0	0	0	0	0	0	0	0	1	0	0	0	0	0	0	0	0	0	0	0	0	0	0	0	0	0	0	0	0	0	0
Anaerococcus	1020	0	0	0	0	0	2	0	0	1	0	0	0	0	0	0	0	0	8	0	0	0	0	0	1	0	0	0	1	0	0	0	0	0	0	0	0	0	0	0	0	0	1	0	0	0	0	0	0
Anaerococcus	1459	0	0	0	0	0	0	0	0	0	0	0	2	0	0	0	0	0	0	0	0	0	0	0	1	0	0	0	0	1	0	0	1	0	0	0	0	0	0	1	0	0	0	0	1	0	0	0	0
Anaerococcus	493	0	0	1	1	0	1	0	1	0	0	0	0	0	0	0	0	0	1	0	0	0	0	0	0	0	0	0	1	0	0	0	0	0	1	0	0	0	0	0	0	0	0	0	0	0	0	0	0
Anaerococcus	941	0	0	1	0	0	0	6	0	0	0	0	0	0	0	0	0	0	0	0	0	0	0	0	2	0	0	0	0	0	0	0	0	0	0	0	0	0	0	0	1	0	0	0	0	0	0	0	0
Anaerococcus	2326	0	0	0	0	0	0	0	0	0	1	0	0	0	0	0	0	0	1	0	0	0	0	0	0	0	0	0	0	0	0	0	0	0	1	0	0	0	0	0	0	0	0	0	0	0	0	0	0
Anaerococcus	656	0	0	1	0	0	0	0	0	0	0	0	1	0	0	0	0	0	0	0	0	0	1	0	1	0	0	0	0	2	0	0	0	0	0	0	0	0	0	0	0	0	0	0	0	0	0	0	0
Anaerococcus	1414	2	1	0	0	0	0	0	0	0	0	0	0	3	1	0	0	0	0	0	0	0	0	0	0	0	0	0	0	0	0	0	0	0	0	0	1	0	0	0	0	0	0	0	0	0	0	0	0
Anaerococcus	683	0	0	1	0	0	0	0	0	0	0	0	0	0	0	0	0	0	0	0	0	1	0	0	0	0	1	0	0	1	0	0	0	0	0	0	0	0	0	0	2	1	0	0	0	0	0	1	0
Anaerococcus	986	0	0	0	0	0	0	0	0	1	0	0	0	0	0	0	0	0	0	3	0	0	1	0	1	0	0	0	1	0	0	0	0	0	0	0	0	0	0	0	0	0	0	0	0	0	0	0	0
Anaerococcus	789	0	0	0	0	0	0	0	1	0	1	0	0	0	0	0	0	0	0	0	0	0	0	0	0	0	0	0	0	0	0	0	0	0	0	0	0	0	0	0	0	0	0	0	0	0	0	0	0
Anaerococcus	847	0	0	0	0	0	0	2	0	0	0	0	0	0	0	0	0	0	0	0	0	0	0	0	1	0	0	0	0	0	0	0	0	0	0	0	2	0	0	0	1	0	0	0	0	0	0	0	0
Anaerococcus	1099	0	0	2	0	0	0	0	0	1	0	0	0	0	0	0	0	0	0	0	0	0	0	0	0	0	0	0	0	0	0	0	1	0	0	0	0	0	0	0	0	0	0	0	0	0	0	0	0
Anaerococcus	1920	0	0	0	0	1	0	0	0	0	0	0	0	0	0	0	0	0	0	0	0	0	0	0	2	0	0	0	0	2	0	0	0	0	0	0	0	0	0	0	0	0	0	0	0	0	0	0	0
Anaerococcus	2213	0	0	0	0	0	0	0	0	1	0	0	0	0	0	0	0	0	0	0	0	0	2	0	0	0	0	0	0	2	0	0	0	0	1	0	0	0	0	0	0	0	0	0	0	0	0	0	0
Anaerococcus	334	0	0	0	0	0	0	0	0	3	0	0	0	0	0	0	0	0	0	0	0	0	1	0	0	0	0	0	1	0	0	0	0	0	0	0	0	0	0	0	0	0	0	0	0	0	0	0	0
Anaerococcus	438	0	0	0	0	1	0	0	0	0	0	0	0	0	0	0	0	0	0	0	0	0	0	0	0	0	0	0	0	0	0	0	1	0	0	0	0	0	0	0	0	2	0	0	0	0	0	0	0
Anaerococcus	971	0	0	0	0	0	0	0	0	0	1	0	1	0	0	0	0	0	1	0	0	0	0	0	0	0	0	0	0	0	0	0	0	0	0	0	0	0	0	1	0	0	0	0	0	0	0	0	0
Anaerococcus	1091	0	0	0	0	0	0	0	0	0	0	0	1	0	0	0	0	0	0	0	0	0	0	0	0	0	0	0	0	0	0	0	0	0	0	0	0	0	0	1	0	0	0	0	0	0	0	0	0
Anaerococcus	1510	0	0	0	0	1	0	0	0	0	0	0	0	0	0	0	0	0	0	0	0	0	0	0	0	0	0	0	0	0	0	0	0	0	0	0	0	0	0	0	0	0	1	0	0	0	0	0	0
Anaerococcus	1714	0	0	0	0	0	0	0	0	0	0	0	0	0	0	0	0	0	0	0	0	0	0	1	0	0	0	0	0	0	0	0	0	0	0	0	0	0	0	0	0	0	0	0	0	0	0	0	0
Anaerococcus	2140	0	0	0	0	0	0	0	0	0	0	0	0	0	0	0	0	0	0	0	0	1	1	0	1	0	0	1	0	0	0	0	0	0	0	0	0	0	0	0	0	0	0	0	0	0	0	0	0
Anaerococcus	2242	0	0	0	0	0	0	2	0	0	0	0	0	0	0	0	0	0	0	0	0	0	0	0	2	0	0	0	0	0	0	0	0	0	0	0	0	0	0	0	0	0	0	0	0	0	0	0	0
Anaerococcus	273	0	0	0	0	0	0	0	1	0	0	0	0	0	0	0	0	0	0	0	0	0	0	0	0	0	0	0	0	1	0	0	0	0	0	0	0	0	0	0	0	0	0	0	0	0	0	0	0
Anaerococcus	398	0	0	1	0	0	0	0	0	0	0	0	0	0	0	1	0	0	0	0	0	0	2	0	0	0	0	0	0	0	0	0	0	0	0	0	0	0	0	0	0	0	0	0	0	0	0	0	0
Anaerococcus	499	0	0	0	0	0	0	3	0	0	0	0	0	0	0	0	0	0	0	0	0	0	0	0	0	0	0	0	0	0	0	0	0	0	0	0	0	0	0	0	0	1	0	0	0	0	0	0	0
Anaerococcus	752	0	0	0	0	0	0	0	0	0	3	0	0	0	0	0	0	0	0	0	0	0	0	0	0	0	0	0	0	0	0	1	0	0	0	0	0	0	0	0	0	0	0	0	0	0	0	0	0
Anaerococcus	766	0	0	1	0	0	0	0	0	0	0	0	0	0	0	0	0	0	0	0	0	0	0	0	1	0	0	0	0	0	0	0	0	0	0	0	0	0	0	0	0	0	0	0	0	0	0	0	0
Anaerococcus	1716	0	0	0	0	0	0	0	0	0	0	0	0	0	0	0	0	1	1	0	0	0	0	0	0	0	0	0	0	1	0	0	0	0	0	0	0	0	0	0	0	0	0	0	0	0	0	0	0
Anaerococcus	1885	0	0	0	0	0	0	0	0	0	0	0	0	0	0	0	0	0	0	1	0	0	1	0	0	0	0	0	0	0	0	0	0	0	0	1	0	0	0	0	0	0	0	0	0	0	0	0	0
Anaerococcus	168	1	0	0	0	0	0	0	0	0	0	0	0	0	0	0	0	0	0	0	0	0	0	0	0	0	0	0	0	1	0	0	0	0	0	1	0	0	0	0	0	0	0	0	0	0	0	0	0
Anaerococcus	181	0	0	0	0	0	0	0	0	0	0	0	0	0	0	0	0	0	0	1	0	0	1	0	0	0	0	0	0	0	0	0	0	0	0	0	0	0	0	0	0	1	0	0	0	0	0	0	0
Anaerococcus	205	0	0	0	0	0	0	0	0	0	1	0	0	0	0	0	0	0	0	0	0	0	0	0	0	0	0	0	0	0	0	0	0	0	0	0	0	0	0	0	0	0	0	0	1	0	0	0	0
Anaerococcus	239	0	0	0	0	0	0	0	0	0	0	0	0	0	0	0	0	0	0	0	0	0	0	0	0	0	0	0	0	1	0	0	0	0	0	0	0	0	0	0	0	0	1	0	0	0	0	0	0
Anaerococcus	251	0	0	0	0	0	0	1	0	0	0	0	0	0	0	1	0	0	0	0	0	0	0	0	1	0	0	0	0	0	0	0	0	0	0	0	0	0	0	0	0	0	0	0	0	0	0	0	0
Anaerococcus	1560	0	0	0	0	0	0	2	0	0	0	0	0	0	0	0	0	0	0	1	0	0	0	0	0	0	0	0	0	0	0	0	0	0	0	0	0	0	0	0	0	0	0	0	0	0	0	0	0
Anaerococcus	1683	0	0	0	1	0	0	0	0	0	0	0	0	0	0	0	0	0	0	1	0	0	0	0	0	0	0	0	0	0	0	0	0	0	0	0	0	0	0	0	0	0	0	0	0	0	0	0	0
Anaerococcus	2363	0	0	1	0	0	0	0	0	0	0	0	1	0	0	0	0	0	0	0	0	0	0	0	0	0	0	0	0	0	0	0	0	0	0	0	0	0	0	0	0	0	1	0	0	0	0	0	0
Anaerococcus	165	0	0	0	0	0	0	0	0	0	0	0	0	0	0	0	0	1	0	0	0	0	0	0	0	0	0	0	0	0	0	0	0	0	0	0	0	1	0	0	0	0	0	0	0	0	0	0	0
Anaerococcus	270	0	0	0	0	0	0	1	0	0	0	0	0	0	0	0	0	0	0	0	0	0	0	0	0	0	0	0	0	1	0	0	0	0	0	0	0	0	0	0	0	0	0	0	0	0	0	0	0
Anaerococcus	280	0	0	0	0	0	0	0	0	0	0	0	0	0	0	0	0	1	0	0	0	0	0	0	0	0	0	0	0	0	0	0	0	0	0	1	0	0	0	0	0	0	0	0	0	0	0	0	0
Anaerococcus	399	0	0	0	0	0	0	0	0	0	0	0	0	0	0	0	0	0	1	0	0	0	0	0	0	0	0	0	0	0	0	0	0	0	0	0	0	0	0	0	0	1	0	0	0	0	0	0	0
Anaerococcus	404	0	0	0	0	0	0	0	0	0	0	0	0	0	0	0	0	0	0	1	0	0	0	1	0	0	0	0	0	0	0	0	0	0	0	0	0	0	0	0	0	0	0	0	0	0	0	0	0
Anaerococcus	424	0	0	0	0	0	0	2	0	0	0	0	0	0	0	0	0	0	0	0	0	0	0	0	0	0	0	0	0	0	0	0	0	0	0	0	0	0	0	0	0	0	0	0	0	0	0	0	0
Anaerococcus	512	0	0	0	0	0	0	0	0	0	0	0	0	0	0	0	0	0	0	0	0	0	0	0	0	0	0	0	0	0	0	0	0	0	0	0	0	0	0	0	1	0	0	0	0	0	0	0	0
Anaerococcus	551	0	0	0	0	0	0	0	0	0	0	0	0	0	0	0	0	0	0	0	0	0	0	0	1	0	0	0	0	0	0	0	0	0	0	0	0	0	0	0	0	1	0	0	0	0	0	0	0
Anaerococcus	601	0	0	0	0	0	0	0	0	0	0	0	0	0	0	0	0	1	0	0	0	0	0	0	0	0	0	0	0	0	0	0	0	0	0	0	1	0	0	0	0	0	0	0	0	0	0	0	0
Anaerococcus	625	0	0	0	0	0	0	0	0	0	0	0	0	0	0	0	0	0	0	0	0	0	0	0	0	0	0	0	0	0	0	0	0	0	0	0	0	0	0	1	0	0	0	0	0	0	0	0	0
Anaerococcus	815	0	1	0	0	0	0	0	0	0	0	0	0	0	0	0	0	0	0	0	0	0	0	0	0	0	0	0	0	0	0	0	0	0	0	0	0	0	0	0	0	0	0	0	0	0	0	1	0
Anaerococcus	931	0	0	0	0	0	0	0	0	0	0	0	0	0	0	0	0	0	0	0	0	0	0	0	1	0	0	0	0	0	0	0	0	0	0	0	0	0	0	0	0	0	0	0	0	0	0	0	0
Anaerococcus	949	0	0	0	0	0	0	0	0	0	0	0	0	0	0	0	0	0	0	1	0	0	0	0	1	0	0	0	0	0	0	0	0	0	0	0	0	0	0	0	0	0	0	0	0	0	0	0	0
Anaerococcus	956	0	0	0	0	0	0	0	0	0	0	0	0	0	0	0	0	0	0	0	0	0	0	0	0	0	0	0	0	0	0	0	0	0	0	0	0	0	0	0	0	0	0	0	0	0	0	0	0
Anaerococcus	1094	0	0	0	0	0	0	0	0	0	0	0	0	0	0	0	0	0	0	0	0	0	0	1	0	0	0	0	0	0	0	0	0	0	0	0	0	0	0	0	0	0	0	0	0	0	0	0	0
Anaerococcus	1114	0	0	0	0	0	0	1	0	0	0	0	0	0	0	0	0	0	0	0	0	0	0	0	0	0	0	0	0	0	0	0	0	0	0	0	0	0	0	0	0	0	0	0	0	0	0	0	0
Anaerococcus	1253	0	0	0	0	0	0	0	0	0	0	0	0	0	0	0	0	0	0	0	0	0	1	0	0	0	0	0	0	0	0	0	0	0	0	0	0	0	0	0	0	0	0	0	0	0	0	0	0
Anaerococcus	1282	0	0	0	0	0	0	0	0	0	0	0	0	0	0	0	0	0	0	0	0	0	0	0	2	0	0	0	0	0	0	0	0	0	0	0	0	0	0	0	0	0	0	0	0	0	0	0	0
Anaerococcus	1316	0	0	0	0	0	0	0	0	0	0	0	0	0	0	0	0	0	0	0	0	0	0	0	0	0	0	0	0	0	0	0	0	0	0	0	0	0	0	0	0	0	0	0	0	0	0	0	0
Anaerococcus	1374	0	0	0	0	0	0	0	0	0	0	0	0	0	0	0	0	0	0	0	0	0	0	0	0	0	0	0	0	0	0	0	0	0	1	0	0	0	0	0	0	0	0	0	0	0	0	0	0
Anaerococcus	1410	0	0	0	0	0	0	0	0	0	1	0	0	0	0	0	0	0	0	0	0	0	0	0	0	0	0	0	0	0	0	0	0	0	0	0	0	0	0	0	0	0	0	0	0	0	0	0	0
Anaerococcus	1500	0	0	0	0	0	0	0	0	0	0	0	0	0	0	0	0	1	0	0	0	0	1	0	0	0	0	0	0	0	0	0	0	0	0	0	0	0	0	0	0	0	0	0	0	0	0	0	0
Anaerococcus	1535	0	0	0	0	0	0	1	0	0	0	0	0	0	0	0	0	0	0	0	0	0	0	0	1	0	0	0	0	0	0	0	0	0	0	0	0	0	0	0	0	0	0	0	0	0	0	0	0
Anaerococcus	1587	0	0	0	2	0	0	0	0	0	0	0	0	0	0	0	0	0	0	0	0	0	0	0	0	0	0	0	0	0	0	0	0	0	0	0	0	0	0	0	0	0	0	0	0	0	0	0	0
Anaerococcus	1609	0	0	0	0	0	0	0	0	0	0	0	0	0	0	1	0	0	0	0	0	0	0	0	0	0	0	0	0	0	0	1	0	0	0	0	0	0	0	0	0	0	0	0	0	0	0	0	0
Anaerococcus	1637	0	0	0	0	0	0	1	0	0	0	0	0	0	0	0	0	0	0	0	0	0	0	0	0	0	0	0	0	0	0	0	1	0	0	0	0	0	0	0	0	0	0	0	0	0	0	0	0
Anaerococcus	1664	0	0	0	0	0	0	0	0	0	0	0	0	0	0	0	0	0	0	0	0	0	0	0	0	0	0	0	0	0	0	1	0	0	0	0	0	0	0	0	0	0	0	0	0	0	0	0	0
Anaerococcus	1711	0	0	0	0	0	0	0	0	0	0	0	0	0	0	0	0	0	0	0	0	0	0	0	0	0	0	0	0	0	0	0	0	0	0	0	0	0	0	0	0	0	0	0	0	1	0	0	0
Anaerococcus	1764	0	0	0	0	0	0	0	0	0	0	0	0	0	0	0	0	0	0	0	0	0	0	0	0	0	0	0	0	0	0	0	0	0	0	0	0	0	0	1	0	0	0	0	0	0	0	0	0
Anaerococcus	1927	0	0	0	0	0	0	0	0	0	0	0	0	0	0	0	0	0	0	0	0	0	0	0	0	0	0	0	0	0	0	0	0	0	0	0	0	0	0	0	0	0	0	0	0	0	0	0	0
Anaerococcus	1930	0	0	0	0	0	0	0	0	0	0	0	0	0	0	0	0	0	0	0	0	0	0	0	0	0	0	0	0	1	0	0	0	0	0	0	0	0	0	0	0	1	0	0	0	0	0	0	0
Anaerococcus	2142	0	0	0	0	0	0	0	0	0	0	0	0	0	0	0	0	0	0	0	0	0	0	0	0	0	0	1	0	0	0	0	0	0	0	0	0	0	0	0	0	0	0	0	0	0	0	0	0
Anaerococcus	2180	0	0	0	0	0	0	0	0	0	0	0	0	0	0	1	0	0	0	0	0	0	0	0	0	0	0	0	0	0	0	0	0	0	0	0	0	0	0	1	0	0	0	0	0	0	0	0	0
Anaerococcus	2224	0	0	0	0	0	0	0	0	0	0	0	0	0	0	0	0	0	1	0	0	0	0	0	0	0	0	0	0	0	0	0	0	0	0	0	0	0	0	0	0	0	0	0	0	0	0	0	0
Anaerococcus	2349	0	0	0	0	0	0	0	0	0	0	0	0	0	0	0	0	0	0	0	0	0	0	0	1	0	0	0	0	0	0	0	0	0	0	0	0	0	0	0	0	0	0	0	0	0	0	0	0
Anaerococcus	36	1	0	0	0	0	0	0	0	0	0	0	0	0	0	0	0	0	0	0	0	0	0	0	0	0	0	0	0	0	0	0	0	0	0	0	0	0	0	0	0	0	0	0	0	0	0	0	0
Anaerococcus	53	0	0	0	0	0	0	0	0	0	0	0	0	0	0	0	0	0	0	0	0	0	0	0	0	0	0	0	0	0	0	0	0	0	0	0	0	0	0	0	0	0	0	0	0	0	0	0	0
Anaerococcus	54	0	0	0	0	0	0	0	0	0	0	0	0	0	0	0	0	0	0	0	0	0	0	0	1	0	0	0	0	0	0	0	0	0	0	0	0	0	0	0	0	0	0	0	0	0	0	0	0
Anaerococcus	61	0	0	0	0	0	0	0	0	0	0	0	0	0	0	1	0	0	0	0	0	0	0	0	0	0	0	0	0	0	0	0	0	0	0	0	0	0	0	0	0	0	0	0	0	0	0	0	0
Anaerococcus	82	0	0	0	0	0	0	0	0	0	0	0	0	0	0	0	0	0	0	0	0	0	0	0	1	0	0	0	0	0	0	0	0	0	0	0	0	0	0	0	0	0	0	0	0	0	0	0	0
Anaerococcus	147	0	0	0	0	0	0	0	0	0	0	0	0	0	0	0	0	0	0	0	0	0	0	0	0	0	0	0	0	0	0	0	0	0	0	0	0	0	0	0	1	0	0	0	0	0	0	0	0
Anaerococcus	153	0	0	0	0	0	0	0	0	0	0	0	0	0	0	0	0	0	0	0	0	0	1	0	0	0	0	0	0	0	0	0	0	0	0	0	0	0	0	0	0	0	0	0	0	0	0	0	0
Anaerococcus	157	0	0	0	0	0	0	0	0	0	0	0	0	0	0	0	0	0	0	0	0	0	0	0	0	0	0	0	0	0	0	0	0	0	0	0	1	0	0	0	0	0	0	0	0	0	0	0	0
Anaerococcus	158	0	0	0	1	0	0	0	0	0	0	0	0	0	0	0	0	0	0	0	0	0	0	0	0	0	0	0	0	0	0	0	0	0	0	0	0	0	0	0	0	0	0	0	0	0	0	0	0
Anaerococcus	160	0	0	0	0	0	0	0	0	0	0	0	0	0	0	0	1	0	0	0	0	0	0	0	0	0	0	0	0	0	0	0	0	0	0	0	0	0	0	0	0	0	0	0	0	0	0	0	0
Anaerococcus	164	0	0	0	1	0	0	0	0	0	0	0	0	0	0	0	0	0	0	0	0	0	0	0	0	0	0	0	0	0	0	0	0	0	0	0	0	0	0	0	0	0	0	0	0	0	0	0	0
Anaerococcus	179	0	0	0	0	0	0	0	0	0	0	0	0	0	0	0	0	0	0	0	0	0	0	0	0	0	0	0	0	0	0	0	0	0	0	0	0	0	0	0	0	0	0	0	0	0	0	0	0
Anaerococcus	254	0	0	0	0	0	0	0	0	0	0	0	0	0	0	0	0	0	0	0	0	0	0	0	0	0	0	0	0	0	0	0	0	0	0	0	0	0	0	0	0	0	0	0	0	0	0	0	0
Anaerococcus	282	0	0	0	0	0	0	0	0	0	0	0	0	0	0	0	0	0	0	0	0	0	0	0	0	0	1	0	0	0	0	0	0	0	0	0	0	0	0	0	0	0	0	0	0	0	0	0	0
Anaerococcus	289	0	0	0	0	0	0	0	0	0	0	0	0	0	0	1	0	0	0	0	0	0	0	0	0	0	0	0	0	0	0	0	0	0	0	0	0	0	0	0	0	0	0	0	0	0	0	0	0
Anaerococcus	295	0	0	0	0	0	0	0	0	0	0	0	0	0	0	0	0	0	0	0	0	0	0	0	0	0	0	0	0	0	0	0	0	0	0	0	0	0	0	0	0	0	0	0	0	0	0	0	0
Anaerococcus	296	0	0	0	0	0	0	0	0	0	0	0	0	0	0	0	0	0	0	0	0	0	0	0	0	0	0	0	0	0	0	0	0	0	0	0	0	0	0	0	0	0	0	0	0	0	0	0	0
Anaerococcus	304	0	0	0	0	0	0	1	0	0	0	0	0	0	0	0	0	0	0	0	0	0	0	0	0	0	0	0	0	0	0	0	0	0	0	0	0	0	0	0	0	0	0	0	0	0	0	0	0
Anaerococcus	315	0	0	0	0	0	0	0	0	0	0	0	0	0	0	0	0	0	0	0	0	0	0	0	0	0	0	0	0	0	0	0	0	0	0	0	0	0	0	0	0	0	0	0	0	0	0	0	0
Anaerococcus	337	0	0	0	0	0	0	0	0	0	0	0	0	0	0	0	1	0	0	0	0	0	0	0	0	0	0	0	0	0	0	0	0	0	0	0	0	0	0	0	0	0	0	0	0	0	0	0	0
Anaerococcus	374	0	0	0	0	0	0	0	0	0	0	0	0	0	0	0	0	0	0	1	0	0	0	0	0	0	0	0	0	0	0	0	0	0	0	0	0	0	0	0	0	0	0	0	0	0	0	0	0
Anaerococcus	419	0	0	0	0	1	0	0	0	0	0	0	0	0	0	0	0	0	0	0	0	0	0	0	0	0	0	0	0	0	0	0	0	0	0	0	0	0	0	0	0	0	0	0	0	0	0	0	0
Anaerococcus	434	0	0	0	0	0	0	0	0	0	0	0	0	0	0	0	1	0	0	0	0	0	0	0	0	0	0	0	0	0	0	0	0	0	0	0	0	0	0	0	0	0	0	0	0	0	0	0	0
Anaerococcus	472	0	0	0	0	0	0	0	0	0	0	0	0	0	0	0	0	0	0	0	0	0	0	0	0	0	0	0	0	0	0	0	0	0	0	0	0	0	0	0	0	0	0	0	0	0	0	1	0
Anaerococcus	523	0	0	0	0	0	0	1	0	0	0	0	0	0	0	0	0	0	0	0	0	0	0	0	0	0	0	0	0	0	0	0	0	0	0	0	0	0	0	0	0	0	0	0	0	0	0	0	0
Anaerococcus	526	0	0	0	0	0	0	0	0	0	0	0	0	0	0	0	0	0	0	0	0	0	0	0	0	0	0	0	0	0	0	0	0	0	0	0	0	0	0	0	0	0	0	0	0	0	0	0	0
Anaerococcus	555	0	0	0	0	0	0	0	0	0	0	0	0	0	0	0	0	0	0	0	0	0	0	0	0	0	0	0	0	1	0	0	0	0	0	0	0	0	0	0	0	0	0	0	0	0	0	0	0
Anaerococcus	589	0	0	0	0	0	0	0	0	0	0	0	0	0	0	0	0	0	0	0	0	0	0	0	0	0	0	0	0	0	0	0	0	0	0	0	1	0	0	0	0	0	0	0	0	0	0	0	0
Anaerococcus	622	0	0	0	0	0	0	0	0	0	0	0	0	0	0	0	0	0	0	0	0	0	0	0	0	0	0	0	0	0	0	0	0	0	0	0	0	0	0	0	0	0	0	0	0	0	0	0	0
Anaerococcus	642	1	0	0	0	0	0	0	0	0	0	0	0	0	0	0	0	0	0	0	0	0	0	0	0	0	0	0	0	0	0	0	0	0	0	0	0	0	0	0	0	0	0	0	0	0	0	0	0
Anaerococcus	717	0	0	0	0	0	0	0	1	0	0	0	0	0	0	0	0	0	0	0	0	0	0	0	0	0	0	0	0	0	0	0	0	0	0	0	0	0	0	0	0	0	0	0	0	0	0	0	0
Anaerococcus	734	0	0	0	0	0	0	1	0	0	0	0	0	0	0	0	0	0	0	0	0	0	0	0	0	0	0	0	0	0	0	0	0	0	0	0	0	0	0	0	0	0	0	0	0	0	0	0	0
Anaerococcus	739	0	0	0	0	0	0	0	0	0	0	0	0	0	0	1	0	0	0	0	0	0	0	0	0	0	0	0	0	0	0	0	0	0	0	0	0	0	0	0	0	0	0	0	0	0	0	0	0
Anaerococcus	744	0	0	0	0	0	0	0	0	0	0	0	0	0	0	0	0	0	0	0	0	0	0	0	0	0	0	0	0	1	0	0	0	0	0	0	0	0	0	0	0	0	0	0	0	0	0	0	0
Anaerococcus	745	0	0	0	0	0	0	0	0	0	0	0	0	0	0	0	0	0	0	0	0	0	0	0	0	0	0	0	0	0	0	0	0	0	0	0	0	0	0	0	0	0	0	0	0	0	0	0	0
Anaerococcus	750	0	0	0	0	0	0	0	0	0	0	0	0	0	0	0	0	0	0	0	0	0	0	0	0	0	0	0	0	0	0	0	0	0	0	0	0	0	0	0	0	0	1	0	0	0	0	0	0
Anaerococcus	759	0	0	0	0	0	0	0	0	0	0	0	0	0	0	0	0	0	0	0	0	0	0	0	0	0	0	0	0	0	0	0	0	0	0	0	0	0	0	0	0	0	0	0	0	0	0	0	0
Anaerococcus	786	0	0	0	0	0	0	1	0	0	0	0	0	0	0	0	0	0	0	0	0	0	0	0	0	0	0	0	0	0	0	0	0	0	0	0	0	0	0	0	0	0	0	0	0	0	0	0	0
Anaerococcus	816	0	0	0	0	0	0	0	0	0	0	0	0	0	0	0	0	0	0	0	0	0	0	0	0	0	0	0	0	0	0	0	0	0	0	0	0	0	0	0	0	1	0	0	0	0	0	0	0
Anaerococcus	876	0	0	0	0	0	0	0	0	0	0	0	0	0	0	0	0	0	0	0	0	0	0	0	0	0	0	0	0	0	0	0	0	0	0	0	0	0	0	0	0	0	0	0	0	0	0	0	0
Anaerococcus	895	0	0	0	0	0	0	0	0	0	0	0	0	0	0	0	0	0	0	0	0	0	0	0	0	0	0	0	0	0	0	0	0	0	0	0	0	0	0	0	1	0	0	0	0	0	0	0	0
Anaerococcus	910	0	0	0	0	0	0	0	0	0	0	0	0	0	0	0	0	0	0	0	0	0	0	0	0	0	0	0	0	1	0	0	0	0	0	0	0	0	0	0	0	0	0	0	0	0	0	0	0
Anaerococcus	930	0	0	0	0	0	0	0	0	0	0	0	0	0	0	0	0	0	0	0	0	0	0	0	0	0	0	0	0	0	0	0	0	0	0	0	1	0	0	0	0	0	0	0	0	0	0	0	0
Anaerococcus	959	0	0	0	0	0	0	0	0	0	0	0	0	0	0	1	0	0	0	0	0	0	0	0	0	0	0	0	0	0	0	0	0	0	0	0	0	0	0	0	0	0	0	0	0	0	0	0	0
Anaerococcus	981	0	0	0	0	0	0	0	0	0	0	0	0	0	0	0	0	0	0	0	0	0	0	0	0	0	0	0	0	0	0	0	0	0	0	1	0	0	0	0	0	0	0	0	0	0	0	0	0
Anaerococcus	983	0	0	0	0	0	0	0	0	0	0	0	0	0	0	0	0	0	0	0	0	0	0	0	0	0	0	0	0	0	0	0	0	0	0	0	0	0	0	0	0	0	0	0	0	0	0	0	0
Anaerococcus	1038	0	0	0	0	0	0	0	0	0	0	0	0	0	0	0	0	1	0	0	0	0	0	0	0	0	0	0	0	0	0	0	0	0	0	0	0	0	0	0	0	0	0	0	0	0	0	0	0
Anaerococcus	1041	0	0	0	0	0	0	0	0	0	0	0	0	0	0	0	0	0	0	0	0	0	0	0	0	0	0	0	0	0	0	0	0	0	0	0	0	0	0	0	0	1	0	0	0	0	0	0	0
Anaerococcus	1055	0	0	0	0	0	0	0	0	0	0	0	0	0	0	0	0	0	0	0	0	0	0	1	0	0	0	0	0	0	0	0	0	0	0	0	0	0	0	0	0	0	0	0	0	0	0	0	0
Anaerococcus	1063	0	0	0	0	0	0	0	0	0	0	0	0	0	0	0	0	0	0	0	0	0	0	0	0	0	0	0	0	0	0	0	0	0	0	0	0	0	0	0	0	0	0	0	0	0	0	0	0
Anaerococcus	1093	0	0	0	0	0	0	0	0	0	0	0	0	0	0	0	0	0	0	0	0	0	0	0	0	0	0	0	0	0	0	0	0	0	0	0	0	0	0	0	0	0	0	0	0	0	0	0	0
Anaerococcus	1136	0	0	0	0	0	0	0	0	0	0	0	0	0	0	0	0	0	0	0	0	0	0	0	0	0	0	0	0	0	0	0	0	0	0	0	0	0	0	0	0	1	0	0	0	0	0	0	0
Anaerococcus	1187	0	0	0	0	1	0	0	0	0	0	0	0	0	0	0	0	0	0	0	0	0	0	0	0	0	0	0	0	0	0	0	0	0	0	0	0	0	0	0	0	0	0	0	0	0	0	0	0
Anaerococcus	1318	0	0	0	0	0	0	0	0	0	0	0	0	0	0	0	0	0	0	0	0	0	0	1	0	0	0	0	0	0	0	0	0	0	0	0	0	0	0	0	0	0	0	0	0	0	0	0	0
Anaerococcus	1363	0	0	0	0	0	0	0	0	0	0	0	0	0	0	0	0	0	0	0	0	0	0	0	0	0	0	0	0	0	0	0	0	0	0	0	0	0	0	0	0	0	0	0	0	0	0	0	0
Anaerococcus	1365	0	0	0	0	0	0	0	0	0	0	0	0	0	0	0	0	0	0	0	0	0	1	0	0	0	0	0	0	0	0	0	0	0	0	0	0	0	0	0	0	0	0	0	0	0	0	0	0
Anaerococcus	1372	0	0	0	0	0	0	0	0	0	0	0	0	0	0	0	0	0	0	0	0	0	0	1	0	0	0	0	0	0	0	0	0	0	0	0	0	0	0	0	0	0	0	0	0	0	0	0	0
Anaerococcus	1392	0	0	0	1	0	0	0	0	0	0	0	0	0	0	0	0	0	0	0	0	0	0	0	0	0	0	0	0	0	0	0	0	0	0	0	0	0	0	0	0	0	0	0	0	0	0	0	0
Anaerococcus	1399	0	0	0	0	0	0	0	0	0	0	0	0	0	0	0	0	0	0	0	0	0	0	0	0	0	0	0	0	0	0	0	0	0	0	0	0	0	0	0	0	0	0	0	0	0	0	0	0
Anaerococcus	1411	0	0	0	0	0	0	0	0	0	0	0	0	0	0	0	0	0	0	0	0	0	0	0	0	0	0	0	0	0	0	0	0	0	0	0	0	0	0	0	0	0	0	0	0	0	0	0	0
Anaerococcus	1412	0	0	0	0	0	0	0	0	0	0	0	0	0	0	0	0	0	0	0	0	0	0	0	0	0	0	0	0	0	0	0	0	0	0	0	0	0	0	0	0	0	0	0	0	0	0	0	0
Anaerococcus	1435	0	0	0	0	0	0	0	0	0	0	0	0	0	0	1	0	0	0	0	0	0	0	0	0	0	0	0	0	0	0	0	0	0	0	0	0	0	0	0	0	0	0	0	0	0	0	0	0
Anaerococcus	1454	1	0	0	0	0	0	0	0	0	0	0	0	0	0	0	0	0	0	0	0	0	0	0	0	0	0	0	0	0	0	0	0	0	0	0	0	0	0	0	0	0	0	0	0	0	0	0	0
Anaerococcus	1464	0	0	0	0	0	0	0	0	0	0	0	0	0	0	0	0	0	0	0	0	0	0	0	0	0	0	0	0	0	0	0	0	0	0	0	0	0	0	0	0	0	1	0	0	0	0	0	0
Anaerococcus	1503	0	0	0	0	0	0	0	0	0	0	0	0	0	0	0	0	1	0	0	0	0	0	0	0	0	0	0	0	0	0	0	0	0	0	0	0	0	0	0	0	0	0	0	0	0	0	0	0
Anaerococcus	1504	0	0	0	0	0	0	0	0	0	0	0	0	0	0	0	0	0	0	0	0	0	0	0	0	0	0	0	0	0	0	0	0	1	0	0	0	0	0	0	0	0	0	0	0	0	0	0	0
Anaerococcus	1546	0	0	0	0	0	0	0	0	0	0	0	0	0	0	0	0	0	0	1	0	0	0	0	0	0	0	0	0	0	0	0	0	0	0	0	0	0	0	0	0	0	0	0	0	0	0	0	0
Anaerococcus	1556	0	0	0	0	0	0	0	0	0	0	0	0	0	0	0	0	0	0	0	0	0	1	0	0	0	0	0	0	0	0	0	0	0	0	0	0	0	0	0	0	0	0	0	0	0	0	0	0
Anaerococcus	1566	0	0	0	0	0	0	0	0	0	0	0	0	0	0	0	0	0	0	0	0	0	0	0	0	0	0	0	0	0	0	0	0	0	0	0	0	0	0	0	0	0	0	0	0	0	0	0	0
Anaerococcus	1577	0	0	0	0	0	0	0	0	0	0	0	0	0	0	0	0	0	0	0	0	0	0	0	1	0	0	0	0	0	0	0	0	0	0	0	0	0	0	0	0	0	0	0	0	0	0	0	0
Anaerococcus	1579	1	0	0	0	0	0	0	0	0	0	0	0	0	0	0	0	0	0	0	0	0	0	0	0	0	0	0	0	0	0	0	0	0	0	0	0	0	0	0	0	0	0	0	0	0	0	0	0
Anaerococcus	1601	0	0	0	0	0	0	0	0	0	0	0	0	0	0	0	0	0	0	1	0	0	0	0	0	0	0	0	0	0	0	0	0	0	0	0	0	0	0	0	0	0	0	0	0	0	0	0	0
Anaerococcus	1605	0	0	0	0	0	0	0	0	0	0	0	0	0	0	0	0	1	0	0	0	0	0	0	0	0	0	0	0	0	0	0	0	0	0	0	0	0	0	0	0	0	0	0	0	0	0	0	0
Anaerococcus	1606	0	0	0	0	0	0	0	0	0	0	0	0	0	0	0	0	0	0	0	0	0	0	0	0	0	1	0	0	0	0	0	0	0	0	0	0	0	0	0	0	0	0	0	0	0	0	0	0
Anaerococcus	1613	0	0	1	0	0	0	0	0	0	0	0	0	0	0	0	0	0	0	0	0	0	0	0	0	0	0	0	0	0	0	0	0	0	0	0	0	0	0	0	0	0	0	0	0	0	0	0	0
Anaerococcus	1617	0	0	0	0	0	0	0	0	0	0	0	0	0	0	0	0	0	0	0	0	0	0	0	0	0	0	0	0	0	0	0	0	0	0	0	0	0	0	0	0	0	0	0	0	0	0	0	0
Anaerococcus	1681	0	0	0	0	0	0	0	0	0	0	0	0	0	0	0	0	0	0	0	0	0	0	0	0	0	0	0	0	0	0	0	0	0	0	0	0	0	0	0	1	0	0	0	0	0	0	0	0
Anaerococcus	1723	0	0	0	0	0	0	0	0	0	0	0	0	0	0	0	0	0	0	0	0	0	0	0	0	0	0	0	0	0	0	0	0	0	0	0	0	0	0	0	0	0	0	0	0	0	0	0	0
Anaerococcus	1724	0	0	0	0	0	0	0	0	0	0	0	0	0	0	0	0	0	0	0	0	0	0	0	1	0	0	0	0	0	0	0	0	0	0	0	0	0	0	0	0	0	0	0	0	0	0	0	0
Anaerococcus	1736	0	0	0	0	1	0	0	0	0	0	0	0	0	0	0	0	0	0	0	0	0	0	0	0	0	0	0	0	0	0	0	0	0	0	0	0	0	0	0	0	0	0	0	0	0	0	0	0
Anaerococcus	1857	0	0	0	0	0	0	0	0	0	0	0	0	0	0	0	0	0	0	0	0	0	0	0	0	0	0	0	0	0	0	0	0	0	0	0	0	0	0	0	0	0	0	0	0	0	0	0	0
Anaerococcus	1869	0	0	0	0	0	0	0	0	0	0	0	0	0	0	0	0	0	0	0	0	0	0	0	0	0	0	0	0	0	0	0	0	0	0	0	0	0	0	0	0	0	0	0	0	0	0	0	0
Anaerococcus	1874	0	0	0	1	0	0	0	0	0	0	0	0	0	0	0	0	0	0	0	0	0	0	0	0	0	0	0	0	0	0	0	0	0	0	0	0	0	0	0	0	0	0	0	0	0	0	0	0
Anaerococcus	1955	0	0	0	0	0	0	0	0	0	0	0	0	0	0	0	1	0	0	0	0	0	0	0	0	0	0	0	0	0	0	0	0	0	0	0	0	0	0	0	0	0	0	0	0	0	0	0	0
Anaerococcus	1957	0	0	0	0	0	0	0	0	0	0	0	0	0	0	0	0	0	0	0	0	0	0	0	0	0	0	0	0	0	0	0	0	0	0	0	0	0	0	0	0	0	0	0	0	0	0	0	0
Anaerococcus	1975	0	0	0	0	0	1	0	0	0	0	0	0	0	0	0	0	0	0	0	0	0	0	0	0	0	0	0	0	0	0	0	0	0	0	0	0	0	0	0	0	0	0	0	0	0	0	0	0
Anaerococcus	1988	0	0	0	0	0	0	0	0	0	0	0	0	0	0	0	0	0	0	0	0	0	0	0	0	0	0	0	0	0	0	0	0	0	0	0	0	0	0	0	0	0	0	0	0	0	0	0	0
Anaerococcus	2000	0	0	0	0	0	0	0	0	0	0	0	0	0	0	0	0	0	0	0	0	0	0	0	0	0	0	0	0	0	0	0	0	0	0	0	0	0	0	0	1	0	0	0	0	0	0	0	0
Anaerococcus	2030	0	0	0	0	0	0	0	0	0	0	0	0	0	0	0	0	0	0	0	0	0	0	0	0	0	0	0	0	0	0	0	0	0	0	0	0	0	0	0	0	1	0	0	0	0	0	0	0
Anaerococcus	2068	0	0	0	0	0	0	0	0	0	0	0	0	0	0	0	0	0	0	0	0	0	0	0	0	0	0	0	0	0	0	0	0	0	0	0	0	0	0	0	0	0	1	0	0	0	0	0	0
Anaerococcus	2071	0	0	0	1	0	0	0	0	0	0	0	0	0	0	0	0	0	0	0	0	0	0	0	0	0	0	0	0	0	0	0	0	0	0	0	0	0	0	0	0	0	0	0	0	0	0	0	0
Anaerococcus	2087	0	0	0	0	0	0	0	0	0	0	0	0	0	0	0	0	0	0	0	0	0	0	0	0	0	0	0	0	0	0	0	0	0	0	0	0	0	0	0	0	0	0	0	0	0	0	0	0
Anaerococcus	2096	0	0	0	0	0	0	0	0	0	0	0	0	0	0	0	0	0	0	0	0	0	0	0	0	0	0	0	0	0	0	0	0	0	0	0	0	0	0	0	0	0	0	0	0	0	0	0	0
Anaerococcus	2253	0	0	0	0	0	0	0	0	0	0	0	0	0	0	0	0	0	0	0	0	0	0	0	0	0	0	0	0	0	0	0	0	0	0	0	0	0	0	0	0	1	0	0	0	0	0	0	0
Anaerococcus	2266	0	0	0	0	0	0	0	0	0	0	0	0	0	0	0	0	0	1	0	0	0	0	0	0	0	0	0	0	0	0	0	0	0	0	0	0	0	0	0	0	0	0	0	0	0	0	0	0
Anaerococcus	2334	0	0	0	0	0	0	0	0	0	0	0	0	0	0	0	0	0	0	0	0	0	0	0	0	0	0	0	0	0	0	0	0	0	0	0	0	0	0	0	0	0	0	0	0	0	0	0	1
Anaerococcus	2351	0	0	0	0	0	0	0	0	0	0	0	0	0	0	1	0	0	0	0	0	0	0	0	0	0	0	0	0	0	0	0	0	0	0	0	0	0	0	0	0	0	0	0	0	0	0	0	0
Anaerococcus	2356	0	0	0	0	0	0	0	0	0	0	0	0	0	0	0	0	0	0	0	0	0	0	0	0	0	0	0	0	0	0	0	0	0	0	0	0	0	0	0	0	1	0	0	0	0	0	0	0
Anaerococcus	2358	0	0	0	0	0	0	0	0	0	0	0	0	0	0	0	0	0	0	0	0	0	0	0	0	0	0	0	0	0	0	0	0	0	0	0	0	0	0	0	0	0	0	0	0	0	0	0	0
Finegoldia	1284	37	9	13	27	47	5	3	5	1	1	0	3	13	12	57	10	4	0	0	2	0	8	28	1	0	2	6	2	8	12	100	4	13	11	23	2	71	2	7	18	50	21	0	17	1	0	32	2
Finegoldia	378	1	0	0	0	3	0	0	0	0	0	0	1	0	0	1	0	0	0	0	0	0	0	1	0	0	0	0	0	0	0	3	0	0	0	0	0	0	0	0	0	0	0	0	1	0	0	1	0
Finegoldia	1743	0	0	0	1	0	1	0	0	0	0	0	0	0	0	0	0	0	0	0	0	0	0	1	0	0	0	0	0	0	0	1	0	1	0	0	0	0	0	1	0	0	0	0	1	0	0	1	0
Finegoldia	837	0	0	0	0	0	0	0	0	0	0	0	0	0	1	0	0	0	0	0	0	0	0	0	0	0	0	0	0	0	0	3	0	1	0	0	0	0	0	0	0	0	1	0	1	0	0	1	0
Finegoldia	829	0	0	0	0	0	0	0	0	0	0	0	0	0	0	0	0	0	0	0	0	0	0	1	0	0	0	0	0	0	0	0	0	1	0	0	0	1	0	0	0	0	0	0	0	0	0	0	0
Finegoldia	209	0	0	0	0	0	0	0	0	0	0	0	0	0	0	0	0	0	0	0	0	0	0	1	0	0	0	0	0	0	0	3	0	0	0	0	0	0	0	0	0	0	0	0	0	0	0	0	0
Finegoldia	991	0	0	0	0	0	0	0	0	0	0	0	0	0	0	0	0	0	0	0	0	0	1	0	0	0	0	0	0	0	0	0	0	0	0	0	0	0	0	0	0	1	0	0	0	0	0	0	0
Finegoldia	1171	0	0	0	0	0	0	0	0	0	0	0	0	0	0	0	0	0	0	0	0	0	0	1	0	0	0	0	0	0	0	0	0	0	0	0	0	0	0	0	1	0	0	0	0	0	0	0	0
Finegoldia	2006	0	0	0	0	0	0	0	0	0	0	0	0	0	0	1	0	0	0	0	0	0	0	0	0	0	0	0	0	0	0	1	0	0	0	0	0	0	0	0	0	0	0	0	0	0	0	1	0
Finegoldia	272	0	0	0	0	0	0	0	0	0	0	0	0	0	0	0	0	0	0	0	0	0	0	0	0	0	0	0	0	0	0	0	0	0	0	0	0	0	0	0	0	0	0	0	0	0	0	0	0
Finegoldia	1064	0	0	0	0	0	0	0	0	0	0	0	0	1	1	0	0	0	0	0	0	0	0	0	0	0	0	0	0	0	0	0	0	0	0	0	0	0	0	0	0	0	0	0	0	0	0	0	0
Finegoldia	1946	0	0	0	0	0	0	0	0	0	0	0	0	0	0	1	0	0	0	0	0	0	0	0	0	0	0	0	0	0	0	1	0	0	0	0	0	0	0	0	0	0	0	0	0	0	0	0	0
Finegoldia	1977	0	0	0	0	0	0	0	0	0	0	0	0	0	0	0	0	0	0	0	0	0	0	1	0	0	0	0	0	0	0	0	0	0	0	0	0	0	0	0	1	0	0	0	0	0	0	0	0
Finegoldia	92	0	0	0	0	0	0	0	0	0	0	0	0	0	0	0	0	0	0	0	0	0	0	0	0	0	0	0	0	0	0	1	0	0	0	0	0	0	0	0	0	0	0	0	0	0	0	0	0
Finegoldia	202	0	0	0	0	0	0	0	0	0	0	0	0	0	0	0	0	0	0	0	0	0	0	1	0	0	0	0	0	0	0	0	0	0	0	0	0	0	0	0	0	0	0	0	0	0	0	0	0
Finegoldia	243	0	0	0	0	0	0	0	0	0	0	0	0	0	0	0	0	0	0	0	0	0	0	0	0	0	0	0	0	0	0	0	0	0	0	0	0	1	0	0	0	0	0	0	0	0	0	0	0
Finegoldia	314	0	0	0	0	0	0	0	0	0	0	0	0	0	0	0	0	0	0	0	0	0	0	0	0	0	0	0	0	0	0	0	0	0	0	0	0	0	0	0	0	0	0	0	0	0	0	0	0
Finegoldia	371	0	0	0	0	0	0	0	0	0	0	0	0	0	0	0	0	0	0	0	0	0	0	0	0	0	0	0	0	0	0	1	0	0	0	0	0	0	0	0	0	0	0	0	0	0	0	0	0
Finegoldia	469	0	0	0	0	0	0	0	0	0	0	0	0	0	0	0	0	0	0	0	0	0	0	0	0	0	0	0	0	0	0	0	0	0	0	0	0	0	0	0	0	0	1	0	0	0	0	0	0
Finegoldia	509	0	0	0	0	0	0	0	0	0	0	0	0	0	1	0	0	0	0	0	0	0	0	0	0	0	0	0	0	0	0	0	0	0	0	0	0	0	0	0	0	0	0	0	0	0	0	0	0
Finegoldia	539	0	0	0	0	0	0	0	0	0	0	0	0	0	0	1	0	0	0	0	0	0	0	0	0	0	0	0	0	0	0	0	0	0	0	0	0	0	0	0	0	0	0	0	0	0	0	0	0
Finegoldia	627	0	0	0	0	1	0	0	0	0	0	0	0	0	0	0	0	0	0	0	0	0	0	0	0	0	0	0	0	0	0	0	0	0	0	0	0	0	0	0	0	0	0	0	0	0	0	0	0
Finegoldia	704	0	0	0	0	0	0	0	0	0	0	0	0	0	0	0	0	0	0	0	0	0	0	0	0	0	0	0	0	0	0	1	0	0	0	0	0	0	0	0	0	0	0	0	0	0	0	0	0
Finegoldia	748	0	0	0	0	0	0	0	0	0	0	0	0	0	0	0	0	0	0	0	0	0	0	0	0	0	0	0	0	0	0	0	0	0	0	0	0	0	0	0	1	0	0	0	0	0	0	0	0
Finegoldia	872	0	0	0	0	0	0	0	0	0	0	0	0	0	0	0	0	0	0	0	0	0	0	0	0	0	0	0	0	0	0	1	0	0	0	0	0	0	0	0	0	0	0	0	0	0	0	0	0
Finegoldia	1117	0	0	0	0	0	0	0	0	0	0	0	0	0	0	0	0	0	0	0	0	0	0	0	0	0	0	0	0	0	0	0	0	0	0	0	0	0	0	0	0	0	0	0	0	0	0	0	0
Finegoldia	1189	0	0	0	0	0	0	0	0	0	0	0	0	0	0	0	0	0	0	0	0	0	0	0	0	0	0	0	0	0	0	0	0	0	0	0	0	0	0	0	0	1	0	0	0	0	0	0	0
Finegoldia	1522	0	0	0	0	0	0	0	0	0	0	0	0	0	0	0	0	0	0	0	0	0	0	0	0	0	0	0	0	0	0	1	0	0	0	0	0	0	0	0	0	0	0	0	0	0	0	0	0
Finegoldia	1555	0	0	0	1	0	0	0	0	0	0	0	0	0	0	0	0	0	0	0	0	0	0	0	0	0	0	0	0	0	0	0	0	0	0	0	0	0	0	0	0	0	0	0	0	0	0	0	0
Finegoldia	2320	0	1	0	0	0	0	0	0	0	0	0	0	0	0	0	0	0	0	0	0	0	0	0	0	0	0	0	0	0	0	0	0	0	0	0	0	0	0	0	0	0	0	0	0	0	0	0	0
Gallicola	624	0	0	0	0	0	0	0	0	0	0	0	0	0	0	0	0	0	0	0	0	0	0	0	0	0	0	0	0	0	0	0	0	0	0	0	3	0	0	0	0	0	0	0	0	0	0	0	0
Gallicola	28	0	0	0	0	0	0	0	0	0	0	0	0	0	0	0	0	0	0	0	0	0	0	0	0	0	0	0	0	0	0	0	0	0	0	0	1	0	0	0	1	0	0	0	0	0	0	0	0
Gallicola	407	0	0	0	0	0	0	0	0	0	0	0	0	0	0	0	0	0	0	0	0	0	0	0	1	0	0	0	0	0	0	0	0	0	0	0	0	0	0	0	0	0	0	0	0	0	0	0	0
Helcococcus	414	0	0	0	0	0	0	0	0	0	0	0	0	0	0	0	0	0	0	0	0	0	0	0	0	0	0	0	0	0	0	0	0	0	1	0	0	0	0	0	0	0	0	0	0	0	0	0	0
Parvimonas	915	0	0	0	0	0	0	0	0	0	0	0	0	0	0	0	0	0	0	0	0	0	0	0	0	0	0	0	0	0	0	0	0	0	0	0	0	0	0	0	0	0	3	0	0	0	0	0	1
Peptoniphilus	2173	35	40	5	21	15	11	35	13	0	23	2	6	31	43	61	9	5	0	2	16	9	7	96	27	20	5	18	20	9	11	16	17	3	18	16	38	10	0	17	42	56	9	3	1	0	0	33	13
Peptoniphilus	804	16	10	0	2	2	3	18	4	0	8	0	0	4	5	2	3	0	0	0	0	0	1	4	7	1	2	1	2	4	5	1	4	2	4	5	1	1	0	5	14	1	9	0	1	0	0	2	4
Peptoniphilus	200	9	1	0	0	0	0	0	0	0	0	0	0	2	1	0	0	0	0	0	0	2	0	0	1	2	0	0	0	4	2	0	2	10	7	7	0	0	0	0	0	0	1	0	0	0	0	0	0
Peptoniphilus	711	0	0	0	1	1	0	0	2	0	0	0	1	1	4	0	0	0	0	0	0	0	0	0	2	4	2	0	0	0	0	0	6	0	1	0	0	0	0	1	8	1	1	0	0	0	0	4	3
Peptoniphilus	1580	0	0	0	0	0	0	0	0	0	0	0	0	0	1	0	0	0	0	0	0	0	0	1	1	0	0	0	0	0	0	1	0	0	0	0	0	0	0	0	1	0	0	0	0	0	0	1	0
Peptoniphilus	1775	0	0	0	0	1	0	0	0	0	0	0	0	0	0	0	0	0	0	0	0	0	0	0	0	0	0	0	0	0	0	0	1	0	0	0	0	0	0	1	0	2	0	0	0	0	0	0	0
Peptoniphilus	1803	1	1	0	1	0	0	0	0	0	0	0	0	0	0	0	0	0	0	0	0	0	0	0	1	0	0	0	0	0	0	0	0	0	0	0	0	0	0	0	0	1	0	0	0	0	0	0	0
Peptoniphilus	1928	0	0	0	0	0	0	0	0	0	0	0	0	0	0	0	0	0	0	0	0	0	0	3	0	0	0	0	1	0	0	0	0	0	0	0	0	0	0	0	0	0	0	0	0	0	0	0	0
Peptoniphilus	773	0	0	0	0	0	0	0	0	0	0	0	0	0	1	0	0	0	0	0	0	0	0	0	0	0	0	0	0	0	0	0	0	0	0	0	0	0	0	0	0	0	0	0	0	0	0	0	0
Peptoniphilus	1108	0	0	0	0	0	0	1	0	0	0	0	0	0	1	0	0	0	0	0	0	0	0	0	1	0	0	0	0	0	0	0	0	0	0	0	0	0	0	0	1	0	0	0	0	0	0	0	0
Peptoniphilus	1469	0	1	0	1	0	0	0	0	0	1	0	0	0	0	0	0	0	0	0	0	0	0	0	0	0	0	0	0	0	0	0	0	0	0	0	0	0	0	0	0	1	0	0	0	0	0	0	0
Peptoniphilus	1779	0	0	0	0	1	0	0	0	0	0	0	0	0	0	0	0	0	0	0	0	0	0	1	0	0	0	0	0	0	0	0	0	0	0	0	0	0	0	0	1	0	0	0	0	0	0	0	1
Peptoniphilus	352	0	0	0	0	0	0	1	0	0	0	0	0	0	0	1	0	0	0	0	0	0	0	0	0	0	0	0	0	0	0	0	0	0	0	0	0	0	0	0	0	1	0	0	0	0	0	0	0
Peptoniphilus	1677	0	0	0	0	0	0	0	0	0	0	0	0	1	1	0	0	0	0	0	0	0	0	1	0	0	0	0	0	0	0	0	0	0	0	0	0	0	0	0	0	0	0	0	0	0	0	0	0
Peptoniphilus	831	0	0	0	0	0	0	0	0	0	0	0	0	0	0	1	0	0	0	0	0	0	0	0	0	0	0	0	1	0	0	0	0	0	0	0	0	0	0	0	0	1	0	0	0	0	0	0	0
Peptoniphilus	1313	0	0	0	0	0	0	0	0	0	0	0	0	0	0	0	0	0	0	0	0	0	0	0	0	0	0	0	0	3	0	0	0	0	0	0	0	0	0	0	0	0	0	0	0	0	0	0	0
Peptoniphilus	1457	0	0	0	0	0	0	0	0	0	0	0	0	0	0	0	0	0	0	0	0	0	0	0	0	1	0	0	0	0	0	0	0	0	0	0	0	0	0	0	0	0	0	0	0	0	0	0	0
Peptoniphilus	1496	0	0	0	0	0	0	0	0	0	0	0	0	0	0	0	0	0	0	0	0	0	0	1	0	0	0	0	0	0	0	0	0	0	0	0	1	0	0	0	0	0	0	0	0	0	0	0	0
Peptoniphilus	1517	0	0	0	0	0	0	0	0	0	1	0	1	0	0	0	0	0	0	0	0	0	0	0	0	0	0	0	0	0	0	0	0	0	0	0	0	0	0	0	0	1	0	0	0	0	0	0	0
Peptoniphilus	1538	0	0	0	0	0	0	0	0	0	0	0	0	0	0	0	0	0	0	0	0	0	0	2	0	0	0	0	0	0	0	0	0	0	0	0	1	0	0	0	0	0	0	0	0	0	0	0	0
Peptoniphilus	570	0	0	0	0	0	0	0	0	0	0	0	0	0	0	0	0	0	0	0	0	0	0	1	0	0	0	0	0	0	0	0	0	0	0	0	0	0	0	0	0	0	0	0	0	0	0	0	0
Peptoniphilus	687	0	0	0	0	0	0	0	0	0	0	0	0	0	0	0	0	0	0	0	0	0	0	0	0	0	0	0	0	0	0	0	0	0	0	0	0	0	0	0	1	1	0	0	0	0	0	0	0
Peptoniphilus	937	0	0	0	0	0	0	0	0	0	0	0	0	0	0	0	0	0	0	0	0	0	0	0	0	0	0	0	0	0	0	0	0	0	0	0	0	0	0	0	0	0	0	0	0	0	0	0	0
Peptoniphilus	1014	0	0	0	0	0	0	0	0	0	0	0	0	0	0	0	0	0	0	0	0	0	0	0	0	0	0	0	0	1	0	0	0	0	1	0	0	0	0	0	0	0	0	0	0	0	0	0	0
Peptoniphilus	1039	0	0	0	0	0	0	0	0	0	0	0	0	0	0	0	0	0	0	0	1	1	0	0	0	0	0	0	0	0	0	0	0	0	0	0	0	0	0	0	0	0	0	0	0	0	0	0	0
Peptoniphilus	1112	0	0	0	0	0	0	0	0	0	0	0	0	0	0	0	0	0	0	0	0	0	0	0	0	2	0	0	0	0	0	0	0	0	0	0	0	0	0	0	0	0	0	0	0	0	0	0	0
Peptoniphilus	1147	0	0	0	0	0	0	1	0	0	0	0	0	0	0	0	0	0	0	0	0	0	0	1	0	0	0	0	0	0	0	0	0	0	0	0	0	0	0	0	0	0	0	0	0	0	0	0	0
Peptoniphilus	1290	0	0	0	0	0	0	0	0	0	0	0	0	0	0	0	0	0	0	0	0	0	0	1	0	0	0	0	0	0	0	0	0	0	0	0	0	0	0	0	0	0	0	0	0	0	0	1	0
Peptoniphilus	1672	0	0	0	0	0	0	0	0	0	0	0	0	0	0	1	0	0	0	0	0	0	0	0	0	0	0	0	0	0	0	0	0	0	0	0	0	0	0	0	0	0	0	0	0	0	0	0	0
Peptoniphilus	1916	0	1	0	0	0	0	0	0	0	0	0	0	0	0	0	0	0	0	0	0	0	0	0	0	0	0	0	0	0	0	0	0	0	0	0	0	0	0	0	0	0	0	0	0	0	0	0	0
Peptoniphilus	2170	0	0	0	0	0	0	0	0	0	0	0	0	0	0	0	0	0	0	0	0	0	0	0	0	0	0	0	1	0	0	0	0	0	0	0	0	0	0	0	0	1	0	0	0	0	0	0	0
Peptoniphilus	2285	0	0	0	0	0	0	0	0	0	0	0	0	0	0	1	0	0	0	0	0	0	0	0	0	0	0	0	0	0	0	0	0	0	0	0	0	0	0	0	0	0	0	0	0	0	0	0	0
Peptoniphilus	85	0	0	0	0	0	0	1	0	0	0	0	0	0	0	0	0	0	0	0	0	0	0	0	0	0	0	0	0	0	0	0	0	0	0	0	0	0	0	0	0	0	0	0	0	0	0	0	0
Peptoniphilus	106	0	0	0	0	0	0	0	0	0	0	0	0	0	0	0	0	0	0	0	0	0	0	0	0	0	0	0	0	1	0	0	0	0	0	0	0	0	0	0	0	0	0	0	0	0	0	0	0
Peptoniphilus	108	0	0	0	0	0	0	0	0	0	0	0	0	0	0	0	0	0	0	0	0	0	0	0	0	0	0	0	0	0	0	0	0	0	0	0	0	0	0	0	1	0	0	0	0	0	0	0	0
Peptoniphilus	156	0	0	0	0	0	0	0	0	0	0	0	0	0	0	0	0	0	0	0	0	0	0	0	0	0	0	0	0	0	0	0	0	0	0	0	1	0	0	0	0	0	0	0	0	0	0	0	0
Peptoniphilus	377	0	0	0	1	0	0	0	0	0	0	0	0	0	0	0	0	0	0	0	0	0	0	0	0	0	0	0	0	0	0	0	0	0	0	0	0	0	0	0	0	0	0	0	0	0	0	0	0
Peptoniphilus	406	0	0	0	0	0	0	0	0	0	0	0	0	0	0	0	0	0	0	0	0	0	0	0	0	0	0	1	0	0	0	0	0	0	0	0	0	0	0	0	0	0	0	0	0	0	0	0	0
Peptoniphilus	443	0	0	0	0	0	0	0	0	0	0	0	0	0	0	0	0	0	0	0	0	0	0	0	0	0	0	0	0	0	0	0	0	0	0	0	0	0	0	1	0	0	0	0	0	0	0	0	0
Peptoniphilus	455	0	0	0	0	0	0	0	0	0	0	0	0	0	0	0	0	0	0	0	0	0	0	0	0	0	0	0	0	0	0	0	0	0	0	0	0	0	0	0	0	0	0	0	0	0	0	1	0
Peptoniphilus	456	0	0	0	0	0	0	0	0	0	0	0	0	0	0	0	0	0	0	0	0	0	0	0	0	1	0	0	0	0	0	0	0	0	0	0	0	0	0	0	0	0	0	0	0	0	0	0	0
Peptoniphilus	465	0	0	0	0	0	0	0	0	0	0	0	0	0	0	0	0	0	0	0	0	0	0	0	0	0	0	0	0	0	0	0	0	0	0	0	0	0	0	0	0	0	0	0	0	0	0	0	0
Peptoniphilus	584	0	0	0	0	0	0	0	0	0	0	0	0	0	0	0	0	0	0	0	0	0	0	0	0	0	0	0	0	0	0	0	0	0	1	0	0	0	0	0	0	0	0	0	0	0	0	0	0
Peptoniphilus	637	0	0	0	0	0	0	0	0	0	0	0	0	0	0	0	0	0	0	0	0	0	0	0	0	0	0	0	0	0	0	0	0	0	0	0	0	0	0	0	0	1	0	0	0	0	0	0	0
Peptoniphilus	863	0	0	0	0	0	0	0	0	0	0	0	0	0	0	0	0	0	0	0	0	0	0	1	0	0	0	0	0	0	0	0	0	0	0	0	0	0	0	0	0	0	0	0	0	0	0	0	0
Peptoniphilus	917	0	0	0	0	0	0	0	0	0	0	0	0	0	0	1	0	0	0	0	0	0	0	0	0	0	0	0	0	0	0	0	0	0	0	0	0	0	0	0	0	0	0	0	0	0	0	0	0
Peptoniphilus	1029	0	0	0	0	0	0	0	0	0	0	0	0	0	0	0	0	0	0	0	0	0	0	0	0	0	0	0	0	0	0	0	0	0	0	0	0	0	0	0	0	0	0	0	0	0	0	0	0
Peptoniphilus	1315	0	0	0	0	0	0	0	0	0	0	0	0	0	0	0	0	0	0	0	0	0	0	0	0	0	0	0	0	0	0	0	0	0	0	0	0	0	0	0	0	0	0	0	0	0	0	0	0
Peptoniphilus	1404	0	0	0	0	0	0	0	1	0	0	0	0	0	0	0	0	0	0	0	0	0	0	0	0	0	0	0	0	0	0	0	0	0	0	0	0	0	0	0	0	0	0	0	0	0	0	0	0
Peptoniphilus	1476	0	0	0	0	0	0	0	1	0	0	0	0	0	0	0	0	0	0	0	0	0	0	0	0	0	0	0	0	0	0	0	0	0	0	0	0	0	0	0	0	0	0	0	0	0	0	0	0
Peptoniphilus	1497	0	0	0	0	0	0	0	0	0	0	0	0	0	0	0	0	0	0	0	0	0	0	0	0	0	0	0	0	0	0	0	0	0	0	0	1	0	0	0	0	0	0	0	0	0	0	0	0
Peptoniphilus	1611	0	0	0	0	0	0	0	0	0	0	0	0	0	0	0	0	0	0	0	0	0	0	0	0	0	0	0	0	0	0	0	0	0	0	0	0	0	0	0	0	0	0	0	0	0	0	0	0
Peptoniphilus	1615	0	0	0	0	0	0	0	0	0	0	0	0	0	0	0	0	0	0	0	0	0	0	0	0	0	0	0	0	1	0	0	0	0	0	0	0	0	0	0	0	0	0	0	0	0	0	0	0
Peptoniphilus	1698	0	0	0	0	0	0	0	0	0	0	0	1	0	0	0	0	0	0	0	0	0	0	0	0	0	0	0	0	0	0	0	0	0	0	0	0	0	0	0	0	0	0	0	0	0	0	0	0
Peptoniphilus	1810	0	0	0	0	0	0	0	0	0	0	0	0	0	0	0	0	0	0	0	0	0	1	0	0	0	0	0	0	0	0	0	0	0	0	0	0	0	0	0	0	0	0	0	0	0	0	0	0
Peptoniphilus	1836	0	0	0	0	0	0	0	0	0	0	0	0	0	1	0	0	0	0	0	0	0	0	0	0	0	0	0	0	0	0	0	0	0	0	0	0	0	0	0	0	0	0	0	0	0	0	0	0
Peptoniphilus	1873	0	0	0	0	0	0	0	0	0	0	0	0	0	0	0	0	0	0	0	0	0	0	0	0	0	0	0	0	0	0	0	0	0	0	0	1	0	0	0	0	0	0	0	0	0	0	0	0
Peptoniphilus	1964	0	0	0	0	0	0	0	0	0	0	0	0	0	0	0	0	0	0	0	0	0	0	0	0	0	0	0	0	0	0	0	0	0	0	1	0	0	0	0	0	0	0	0	0	0	0	0	0
Peptoniphilus	2072	0	0	0	0	0	0	0	0	0	0	0	0	0	0	0	0	0	0	0	0	0	0	0	0	0	0	0	0	0	0	0	0	0	0	0	1	0	0	0	0	0	0	0	0	0	0	0	0
Peptoniphilus	2162	0	0	0	0	0	0	0	0	0	0	0	0	0	0	0	0	0	0	0	0	0	1	0	0	0	0	0	0	0	0	0	0	0	0	0	0	0	0	0	0	0	0	0	0	0	0	0	0
Peptoniphilus	2264	0	1	0	0	0	0	0	0	0	0	0	0	0	0	0	0	0	0	0	0	0	0	0	0	0	0	0	0	0	0	0	0	0	0	0	0	0	0	0	0	0	0	0	0	0	0	0	0
Clostridiales	1610	0	3	0	0	0	0	0	1	0	2	0	0	0	0	0	7	0	0	3	0	0	0	0	44	0	0	0	0	9	0	0	2	0	5	0	20	1	0	0	1	0	4	0	1	0	0	0	7
Clostridiales	2347	0	0	0	0	0	0	0	0	1	0	0	0	0	0	0	0	0	5	3	0	0	28	0	1	0	0	0	1	0	0	0	0	0	0	0	0	0	0	1	0	0	0	0	2	0	0	0	0
Clostridiales	944	0	0	0	0	0	0	0	0	0	0	0	0	0	0	0	0	0	0	2	0	0	0	0	0	0	0	0	0	0	2	0	0	0	2	0	0	0	0	0	0	0	0	0	2	0	0	0	0
Clostridiales	1509	0	1	0	0	0	0	0	0	0	0	0	0	0	0	0	0	0	0	0	0	0	0	0	1	0	0	0	0	0	0	0	0	0	0	0	5	0	0	0	0	0	0	0	0	0	0	0	0
Clostridiales	1333	0	0	0	0	0	0	0	0	0	0	0	0	0	0	0	0	0	0	0	0	0	0	0	0	0	0	0	0	0	0	0	0	0	0	0	5	0	0	0	0	0	1	0	0	0	0	0	3
Clostridiales	678	0	0	0	0	0	0	0	0	0	0	0	0	0	0	0	0	0	0	0	0	0	0	0	0	0	0	0	0	0	0	0	0	0	0	0	1	0	0	0	1	0	0	0	0	0	0	0	1
Clostridiales	2287	0	0	0	0	0	0	0	0	0	0	0	0	0	0	0	0	0	0	0	0	0	0	1	1	0	0	0	0	0	0	0	0	0	0	0	0	0	0	0	0	0	0	0	0	0	0	0	0
Clostridiales	2043	0	0	0	0	0	0	0	0	0	0	0	0	0	0	0	0	0	0	0	0	0	0	2	0	0	0	0	0	0	0	0	0	0	0	0	0	0	0	0	0	0	0	0	0	0	0	0	0
Clostridiales	2146	0	0	0	0	0	0	1	0	0	0	0	0	0	0	0	0	0	0	0	0	0	0	0	0	0	0	0	0	0	0	0	0	0	0	0	0	0	0	0	0	0	0	0	0	0	0	0	0
Clostridiales	88	0	0	0	0	0	0	0	0	0	0	0	0	0	0	0	0	0	0	0	0	0	0	0	1	0	0	0	0	0	0	0	0	0	0	0	0	0	0	0	0	0	0	0	0	0	0	0	0
Clostridiales	216	0	0	0	0	0	0	0	0	0	0	0	0	0	0	0	0	0	0	0	0	0	0	0	0	0	0	0	0	0	0	0	0	0	0	0	0	0	0	0	0	0	0	0	0	0	0	0	0
Clostridiales	223	0	0	0	0	0	0	0	0	0	0	0	0	0	0	0	0	0	0	0	0	0	0	0	0	0	0	0	0	0	0	0	0	0	0	0	0	0	0	0	0	0	0	0	0	0	0	0	0
Clostridiales	553	0	0	0	0	0	0	0	0	0	0	0	0	0	0	0	0	0	0	0	0	0	0	1	0	0	0	0	0	0	0	0	0	0	0	0	0	0	0	0	0	0	0	0	0	0	0	0	0
Clostridiales	784	1	0	0	0	0	0	0	0	0	0	0	0	0	0	0	0	0	0	0	0	0	0	0	0	0	0	0	0	0	0	0	0	0	0	0	0	0	0	0	0	0	0	0	0	0	0	0	0
Clostridiales	1001	0	0	0	0	0	0	0	0	0	0	0	0	0	0	0	0	0	0	0	0	0	0	0	0	0	0	0	0	0	0	0	0	0	0	0	0	0	0	0	0	1	0	0	0	0	0	0	0
Clostridiales	1070	0	0	0	0	0	0	0	0	0	0	0	0	0	0	0	0	0	0	0	0	0	0	0	0	0	0	0	0	0	0	0	0	0	0	0	0	0	0	0	0	0	0	0	0	0	0	0	0
Clostridiales	1138	0	0	0	0	0	0	0	0	0	0	0	0	0	0	0	0	0	0	0	0	1	0	0	0	0	0	0	0	0	0	0	0	0	0	0	0	0	0	0	0	0	0	0	0	0	0	0	0
Clostridiales	1143	0	0	0	0	0	0	0	0	0	0	0	0	0	0	0	0	0	0	0	0	0	0	0	0	0	0	0	0	1	0	0	0	0	0	0	0	0	0	0	0	0	0	0	0	0	0	0	0
Clostridiales	1155	0	0	0	0	0	0	0	0	0	0	0	0	0	0	0	0	0	0	0	0	0	0	0	0	0	0	0	0	0	0	0	0	0	0	0	0	0	0	0	0	1	0	0	0	0	0	0	0
Clostridiales	1237	0	0	0	0	0	0	1	0	0	0	0	0	0	0	0	0	0	0	0	0	0	0	0	0	0	0	0	0	0	0	0	0	0	0	0	0	0	0	0	0	0	0	0	0	0	0	0	0
Clostridiales	1274	0	0	0	0	0	0	0	0	0	0	0	0	0	0	0	0	0	0	1	0	0	0	0	0	0	0	0	0	0	0	0	0	0	0	0	0	0	0	0	0	0	0	0	0	0	0	0	0
Clostridiales	1277	0	0	0	0	0	0	0	0	0	0	0	0	0	0	0	0	0	0	0	0	0	0	0	0	0	0	0	0	0	0	0	0	0	0	0	0	0	0	0	0	0	0	0	0	0	0	0	1
Clostridiales	1589	0	0	0	0	0	0	0	0	0	0	0	0	0	0	0	0	0	0	0	0	0	0	0	0	0	0	0	0	0	0	0	0	0	0	0	0	0	0	0	0	0	0	0	0	0	0	0	0
Clostridiales	1818	0	0	0	0	0	0	0	0	0	0	0	0	0	0	0	0	0	0	0	0	0	0	0	0	1	0	0	0	0	0	0	0	0	0	0	0	0	0	0	0	0	0	0	0	0	0	0	0
Clostridiales	1882	0	0	0	0	0	0	0	0	0	0	0	0	0	0	0	0	0	0	0	0	0	0	0	0	0	0	0	0	1	0	0	0	0	0	0	0	0	0	0	0	0	0	0	0	0	0	0	0
Clostridiales	1976	0	0	0	0	0	0	0	0	0	0	0	0	0	0	0	0	0	0	1	0	0	0	0	0	0	0	0	0	0	0	0	0	0	0	0	0	0	0	0	0	0	0	0	0	0	0	0	0
Clostridiales	2254	0	0	0	0	0	0	0	0	0	0	0	0	0	0	0	0	0	0	0	0	0	0	0	1	0	0	0	0	0	0	0	0	0	0	0	0	0	0	0	0	0	0	0	0	0	0	0	0
Clostridiales	2352	0	0	0	0	0	0	0	0	0	0	0	0	0	0	0	0	0	0	0	0	0	0	0	0	0	0	0	0	0	0	0	0	0	0	0	0	0	0	0	1	0	0	0	0	0	0	0	0
Clostridiales	440	0	1	0	0	0	0	0	0	0	0	0	0	0	0	0	2	0	0	0	2	1	0	0	1	0	3	4	2	0	1	0	0	0	0	0	1	0	0	0	0	0	1	0	3	0	0	0	0
Anaerostipes	2323	0	0	0	0	0	0	0	0	0	0	0	0	0	0	0	0	0	0	0	0	0	0	0	0	0	0	0	0	0	0	0	0	0	0	0	0	0	0	0	0	0	0	0	0	0	0	0	0
Moryella	116	0	0	0	0	0	0	0	0	0	0	0	0	0	0	0	0	0	0	0	0	0	0	0	0	0	0	0	0	0	0	0	0	0	0	0	0	1	0	0	0	0	0	0	0	0	0	0	0
Lachnospiraceae	1791	0	0	0	0	0	0	0	0	0	0	0	0	0	0	0	0	0	0	0	0	0	0	0	0	0	2	0	1	0	0	0	0	0	0	0	0	0	0	0	0	0	0	0	0	0	0	0	0
Lachnospiraceae	1056	0	0	0	0	0	0	0	0	0	0	0	0	0	0	0	0	0	0	0	0	0	0	0	0	0	0	0	0	0	0	0	0	0	0	0	0	0	0	0	0	0	0	0	0	0	0	0	0
Lachnospiraceae	2201	0	0	0	0	0	0	0	0	0	0	0	0	0	0	0	0	0	0	0	0	0	0	0	0	0	0	0	0	0	0	0	0	0	0	0	0	0	0	0	0	0	0	0	0	0	0	0	0
Lachnospiraceae	1473	0	0	0	0	0	0	0	0	0	0	0	0	0	0	0	0	0	0	0	0	0	0	0	0	0	0	0	0	0	0	0	0	0	0	0	0	0	1	0	0	0	0	0	0	0	0	0	0
Lachnospiraceae	1901	0	0	0	0	0	0	0	0	0	0	0	0	0	0	0	0	0	0	0	0	0	0	0	0	0	0	0	0	0	0	0	0	0	0	0	0	0	0	0	0	0	0	0	0	0	0	0	0
Lachnospiraceae	2289	0	0	0	0	0	0	0	0	0	0	0	0	0	0	0	0	0	0	0	0	0	0	0	0	0	0	0	0	0	0	0	0	0	1	0	0	0	0	0	0	0	0	0	0	0	0	0	0
Peptococcus	467	0	1	0	1	1	0	2	1	0	0	0	5	21	13	3	1	0	0	0	1	0	0	0	2	32	0	1	0	1	2	0	33	0	11	2	1	0	0	0	7	1	4	0	0	0	0	4	4
Peptococcus	1127	0	0	0	0	0	0	0	0	0	0	0	0	0	0	0	0	0	0	0	0	0	0	0	0	3	0	0	0	0	0	0	0	0	0	0	0	0	0	0	0	0	0	0	0	0	0	0	0
Peptococcus	1774	0	0	0	0	0	0	0	0	0	0	0	0	0	0	0	0	0	0	0	0	0	0	0	0	2	0	0	0	0	0	0	0	0	0	0	0	0	0	0	0	0	0	0	0	0	0	0	0
Peptococcus	1841	0	0	0	0	0	0	0	0	0	0	0	0	0	0	0	0	0	0	0	0	0	0	0	0	1	0	0	0	0	0	0	0	0	1	0	0	0	0	0	0	0	0	0	0	0	0	0	0
Peptococcus	2059	0	0	0	0	0	0	0	0	0	0	0	0	0	0	0	0	0	0	0	0	0	0	0	0	0	0	0	0	1	0	0	0	0	0	0	0	0	0	0	0	0	0	0	0	0	0	0	1
Peptococcus	126	0	0	0	0	0	0	0	0	0	0	0	0	0	0	0	0	0	0	0	0	0	0	0	0	1	0	0	0	0	0	0	0	0	0	0	0	0	0	0	0	0	0	0	0	0	0	0	0
Peptococcus	421	0	0	0	0	0	0	0	0	0	0	0	0	0	0	0	0	0	0	0	0	0	0	0	0	0	0	0	0	0	0	0	1	0	0	0	0	0	0	0	0	0	0	0	0	0	0	0	0
Peptococcus	510	0	0	0	0	0	0	0	0	0	0	0	0	0	0	0	0	0	0	0	0	0	0	0	0	1	0	0	0	0	0	0	0	0	0	0	0	0	0	0	0	0	0	0	0	0	0	0	0
Peptococcus	576	0	0	0	0	0	0	0	0	0	0	0	0	0	0	0	0	0	0	0	0	0	0	0	0	0	0	0	0	0	0	0	0	0	0	0	0	0	0	0	0	0	0	0	0	0	0	0	0
Peptococcus	604	0	0	0	0	0	0	0	0	0	0	0	0	0	0	0	0	0	0	0	0	0	0	0	0	1	0	0	0	0	0	0	0	0	0	0	0	0	0	0	0	0	0	0	0	0	0	0	0
Peptococcus	651	0	0	0	0	0	0	0	0	0	0	0	0	0	0	0	0	0	0	0	0	0	0	0	0	1	0	0	0	0	0	0	0	0	0	0	0	0	0	0	0	0	0	0	0	0	0	0	0
Peptococcus	705	0	0	0	0	0	0	0	0	0	0	0	0	0	0	0	0	0	0	0	0	0	0	0	1	0	0	0	0	0	0	0	0	0	0	0	0	0	0	0	0	0	0	0	0	0	0	0	0
Peptococcus	802	0	0	0	0	0	0	0	0	0	0	0	0	0	0	0	0	0	0	0	0	0	0	0	0	1	0	0	0	0	0	0	0	0	0	0	0	0	0	0	0	0	0	0	0	0	0	0	0
Peptococcus	849	0	0	0	0	0	0	0	0	0	0	0	0	0	1	0	0	0	0	0	0	0	0	0	0	0	0	0	0	0	0	0	0	0	0	0	0	0	0	0	0	0	0	0	0	0	0	0	0
Peptococcus	1600	0	0	0	0	0	0	0	0	0	0	0	0	0	0	0	0	0	0	0	0	0	0	0	0	0	0	0	0	0	0	0	0	0	0	0	0	0	0	0	0	0	0	0	0	0	0	0	0
Peptococcus	1762	0	0	0	0	0	0	0	0	0	0	0	0	0	0	0	0	0	0	0	0	0	0	0	0	1	0	0	0	0	0	0	0	0	0	0	0	0	0	0	0	0	0	0	0	0	0	0	0
Peptococcus	1868	0	0	0	0	0	0	0	0	0	0	0	0	0	0	0	0	0	0	0	0	0	0	0	0	0	0	0	0	0	0	0	0	0	0	0	1	0	0	0	0	0	0	0	0	0	0	0	0
Peptococcus	1965	0	0	0	0	0	0	0	0	0	0	0	0	0	0	0	0	0	0	0	0	0	0	0	0	1	0	0	0	0	0	0	0	0	0	0	0	0	0	0	0	0	0	0	0	0	0	0	0
Peptostreptococcaceae Incertae Sedis	330	0	0	0	0	0	0	0	0	0	0	0	0	0	0	0	0	0	0	1	0	0	0	0	0	0	0	0	0	0	0	0	0	0	0	0	0	0	0	0	0	0	0	0	0	0	0	0	0
Peptostreptococcus	65	0	0	0	0	0	0	0	0	0	0	0	0	0	0	0	0	0	0	0	0	0	0	0	0	0	0	0	0	0	0	0	0	4	0	0	0	0	0	0	0	0	0	0	0	0	0	0	0
Peptostreptococcaceae	1081	0	0	0	0	0	0	0	0	0	0	1	0	0	0	0	0	0	0	0	0	0	0	0	0	0	0	0	0	0	0	0	0	0	0	0	0	0	0	0	0	0	0	0	0	0	0	0	0
Faecalibacterium	1441	0	0	0	0	0	5	0	0	0	0	0	0	0	0	0	0	0	0	0	0	0	0	0	0	0	0	0	0	0	0	0	0	0	0	0	0	0	0	0	0	0	0	0	0	0	0	0	0
Faecalibacterium	292	0	0	0	0	0	0	0	0	0	0	0	0	0	0	0	0	0	1	0	0	0	0	0	0	0	0	0	0	0	0	0	0	0	0	0	0	0	1	0	0	0	0	0	0	0	0	0	0
Faecalibacterium	1878	0	0	0	0	0	0	0	0	0	0	0	0	0	0	0	0	0	0	0	0	0	0	0	0	0	0	0	0	0	0	0	0	0	0	0	0	0	1	0	0	0	0	0	0	0	0	0	0
Fastidiosipila	367	0	1	0	1	0	0	2	0	0	0	0	0	0	0	0	0	0	0	0	0	0	0	0	0	0	0	0	0	2	0	0	0	1	0	0	1	0	0	0	0	0	0	0	0	0	0	0	0
Fastidiosipila	1526	0	0	0	0	0	0	0	0	0	0	0	0	0	0	0	0	0	0	0	0	0	0	0	0	0	0	0	0	0	0	0	0	0	0	0	0	0	0	0	0	0	0	0	0	0	0	0	0
Sporobacter	743	0	0	0	0	0	0	0	0	0	0	0	0	0	0	0	0	0	0	0	0	0	0	0	0	0	0	0	0	0	0	0	0	0	0	0	0	0	0	0	0	0	0	0	0	0	0	0	0
Ruminococcaceae	887	0	0	0	0	0	0	0	0	0	0	0	0	0	0	0	0	0	0	0	0	0	0	0	0	0	0	0	0	0	0	0	0	0	0	0	0	0	2	0	0	0	0	0	0	0	0	0	0
Ruminococcaceae	1345	0	0	0	0	0	0	0	0	0	0	0	0	0	0	0	0	0	0	0	0	0	0	0	0	0	0	0	0	0	0	0	0	0	0	0	0	0	0	0	0	0	0	0	0	0	0	0	0
Ruminococcaceae	1371	0	0	0	0	0	0	0	0	0	0	0	0	0	0	0	0	0	0	0	0	0	0	0	0	0	0	2	0	0	0	0	0	0	0	0	0	0	0	0	0	0	0	0	0	0	0	0	0
Ruminococcaceae	1071	0	0	0	0	0	0	0	0	0	0	0	0	0	0	0	0	0	0	0	0	0	0	0	0	0	0	0	0	0	0	0	0	0	0	0	0	0	1	0	0	0	0	0	0	0	0	0	0
Ruminococcaceae	1076	0	0	0	0	0	0	0	0	0	0	0	0	0	0	0	0	0	0	0	0	0	0	0	0	0	0	0	0	0	0	0	0	0	0	0	0	0	0	0	0	0	0	0	0	0	0	0	0
Anaeroglobus	189	0	0	0	0	0	0	0	0	0	0	0	0	0	0	0	0	0	0	0	0	0	0	0	0	0	0	0	0	0	0	0	0	0	0	0	0	0	0	0	0	0	1	0	0	0	0	0	1
Dialister	1122	2	4	0	0	4	0	0	3	0	1	0	0	4	2	0	2	0	0	0	3	11	0	1	1	4	4	3	7	0	0	0	2	1	5	0	0	0	0	1	2	0	6	0	0	0	0	2	0
Dialister	1176	0	0	0	0	0	0	0	0	0	0	0	0	0	0	0	0	0	0	0	2	0	0	0	0	0	0	0	0	0	0	0	0	0	0	0	0	0	0	0	0	0	0	0	0	0	0	0	0
Dialister	2271	0	0	0	0	0	0	0	0	0	0	0	0	0	0	0	0	0	0	0	0	0	0	0	0	0	0	0	0	0	0	0	0	0	0	0	0	0	0	0	0	0	0	0	0	0	0	0	0
Dialister	3	0	0	0	0	0	0	0	0	0	0	0	0	0	0	0	0	0	0	0	0	1	0	0	0	0	0	0	0	0	0	0	0	0	0	0	0	0	0	0	0	0	0	0	0	0	0	0	0
Dialister	104	0	0	0	0	0	0	0	0	0	0	0	0	0	0	0	0	0	0	0	0	0	0	0	0	1	0	0	0	0	0	0	0	0	0	0	0	0	0	0	0	0	0	0	0	0	0	0	0
Dialister	1095	0	1	0	0	0	0	0	0	0	0	0	0	0	0	0	0	0	0	0	0	0	0	0	0	0	0	0	0	0	0	0	0	0	0	0	0	0	0	0	0	0	0	0	0	0	0	0	0
Dialister	1950	0	0	0	0	0	0	0	0	0	0	0	0	0	0	0	0	0	0	0	0	0	0	0	0	0	0	0	0	0	0	0	0	0	0	0	0	0	0	0	0	0	0	0	0	0	0	0	0
Dialister	2009	0	0	0	0	0	0	0	0	0	0	0	0	0	0	0	0	0	0	0	0	0	0	0	0	0	0	0	0	0	0	1	0	0	0	0	0	0	0	0	0	0	0	0	0	0	0	0	0
Succiniclasticum	698	0	0	0	0	0	0	0	0	0	0	0	0	0	0	0	5	0	0	0	0	0	0	0	0	0	0	0	0	0	0	0	0	0	0	0	0	0	0	0	0	0	0	0	0	0	0	0	0
Veillonella	2114	0	0	0	0	0	0	0	0	0	0	0	0	0	0	0	0	0	0	0	0	0	0	0	0	0	0	0	0	0	0	5	0	0	0	0	0	0	0	0	0	0	0	0	0	0	0	0	0
Veillonella	1483	0	0	0	0	0	2	0	0	0	0	0	0	0	0	0	0	0	0	0	0	0	0	0	0	0	0	0	0	0	0	3	0	0	0	0	0	0	0	0	0	0	0	0	0	0	0	0	0
Veillonella	475	0	0	0	0	0	0	0	0	0	0	0	0	0	0	0	0	0	0	0	0	0	0	0	0	0	0	0	0	0	0	1	0	0	0	0	0	0	0	0	0	0	0	0	0	0	0	0	0
Veillonella	987	0	0	0	0	0	0	0	0	0	0	0	0	0	0	0	0	0	0	0	0	0	0	0	0	0	0	0	0	0	0	1	0	0	0	0	0	0	0	0	0	0	0	0	0	0	0	0	0
Veillonella	1657	0	0	0	0	0	0	0	0	0	0	0	0	0	0	0	0	0	0	0	0	0	0	0	0	0	0	0	0	0	0	1	0	0	0	0	0	0	0	0	0	0	0	0	0	0	0	0	0
Veillonella	2041	0	0	0	0	0	0	0	0	0	0	0	0	0	0	0	0	0	0	0	0	0	0	0	0	0	0	0	0	0	0	1	0	0	0	0	0	0	0	0	0	0	0	0	0	0	0	0	0
Veillonella	2331	0	0	0	0	0	0	0	0	0	0	0	0	0	0	0	0	0	0	0	0	0	0	0	0	0	0	0	0	0	0	1	0	0	0	0	0	0	0	0	0	0	0	0	0	0	0	0	0
Veillonellaceae	1191	0	2	0	0	3	0	3	0	0	1	0	0	0	1	0	1	0	0	0	1	0	0	6	2	0	0	4	2	0	2	0	0	6	3	0	3	5	0	7	17	5	0	0	0	0	0	3	0
Veillonellaceae	450	0	0	0	0	0	0	0	0	0	0	0	0	0	0	0	1	0	0	0	0	0	0	0	0	0	0	0	0	0	0	0	0	0	0	0	0	0	0	0	0	0	0	0	0	0	0	0	0
Veillonellaceae	483	0	0	0	0	0	0	0	0	0	0	0	0	0	0	0	0	0	0	0	0	0	0	0	0	0	0	0	0	0	0	0	0	0	0	0	0	0	0	0	0	0	0	0	0	0	0	0	0
Veillonellaceae	1156	0	0	0	0	0	0	0	0	0	0	0	0	0	0	0	0	0	0	0	0	0	0	0	0	0	0	0	0	0	0	1	0	0	0	0	0	0	0	0	0	0	0	0	0	0	0	0	0
Clostridiales	137	0	29	0	1	10	12	0	5	0	18	0	7	0	0	0	0	0	1	0	10	0	0	68	1	0	4	14	13	29	51	0	1	11	50	1	3	0	0	5	31	3	7	0	6	0	0	1	5
Clostridiales	1641	0	0	0	0	1	0	0	6	0	9	5	0	9	5	0	10	0	0	0	20	14	0	0	1	4	12	13	12	1	1	0	2	0	4	0	9	2	0	0	1	1	8	0	0	0	0	0	8
Clostridiales	287	0	0	0	0	0	0	0	0	0	0	0	2	22	15	0	0	0	0	0	0	0	0	0	3	29	0	0	0	0	0	0	35	0	3	1	2	0	0	0	0	0	0	0	0	0	0	0	0
Clostridiales	1876	9	9	0	0	4	3	13	1	0	3	0	0	3	1	5	0	0	0	0	0	0	0	0	14	1	0	0	1	1	0	0	0	0	1	0	5	1	0	0	2	1	1	0	1	0	0	3	5
Clostridiales	1786	2	0	0	1	0	0	4	0	0	3	0	1	1	0	0	0	0	0	1	0	0	0	0	6	0	2	2	2	3	0	0	2	0	0	0	5	0	0	0	1	0	0	0	0	0	0	0	0
Clostridiales	2084	0	1	0	0	0	0	3	2	0	1	0	2	4	4	0	4	0	0	0	3	2	0	0	2	4	3	1	2	0	0	0	2	0	5	0	5	0	0	0	0	0	1	0	2	0	0	0	3
Clostridiales	2250	0	1	0	0	0	0	8	0	0	0	0	0	0	0	0	0	0	0	0	0	0	0	0	13	0	0	1	2	2	0	0	1	0	0	0	8	0	0	1	3	0	0	0	0	0	0	1	4
Clostridiales	605	0	1	0	0	0	0	0	0	0	0	0	0	0	0	0	0	0	0	0	1	0	0	1	0	0	0	1	0	0	0	0	0	0	2	1	0	0	0	0	0	0	1	0	0	0	0	0	0
Clostridiales	487	0	0	0	0	0	0	1	0	0	0	0	0	0	0	0	0	0	0	0	0	0	0	0	0	0	0	0	0	0	0	0	0	0	0	0	5	0	0	0	0	0	1	0	1	0	0	0	1
Clostridiales	630	0	0	0	0	0	0	0	0	0	0	0	0	0	0	0	0	0	0	0	0	0	0	1	0	0	0	0	0	0	0	0	0	0	0	0	1	0	0	0	0	0	0	0	0	0	0	0	0
Clostridiales	528	0	0	0	0	0	0	0	0	0	0	0	0	0	0	0	0	0	0	0	0	0	0	1	0	0	0	0	0	0	0	0	0	0	0	0	0	0	0	0	1	0	0	0	0	0	0	0	0
Clostridiales	1951	0	0	0	0	0	0	0	0	0	0	0	0	0	0	0	0	0	0	0	0	0	0	0	0	0	0	0	0	0	0	0	0	0	0	0	0	0	0	0	1	0	1	0	0	0	0	0	0
Clostridiales	2122	0	0	0	0	0	0	0	0	0	0	0	0	0	0	0	0	0	0	0	0	1	0	0	0	0	0	0	0	0	0	0	0	0	0	0	0	0	0	0	3	0	0	0	0	0	0	0	0
Clostridiales	100	0	0	0	0	0	0	0	0	0	0	0	0	0	0	0	0	0	0	0	0	0	0	0	0	0	0	0	0	0	0	0	0	0	0	0	0	0	0	0	0	0	0	0	0	0	0	0	0
Clostridiales	504	0	0	0	0	0	0	0	0	0	0	0	0	0	0	0	1	0	0	0	0	0	0	0	0	0	0	0	0	0	0	0	0	0	0	0	0	0	0	0	0	0	0	0	0	0	0	0	0
Clostridiales	1321	0	0	0	0	0	0	0	0	0	0	0	0	0	0	0	0	0	0	1	0	0	0	0	0	0	0	0	0	0	0	0	0	0	0	0	0	0	0	0	0	0	1	0	0	0	0	0	1
Clostridiales	2116	0	0	0	0	0	0	1	0	0	0	0	0	0	0	0	0	0	0	0	0	0	0	1	0	0	0	0	0	0	0	0	0	0	0	0	0	0	0	0	0	0	0	0	0	0	0	0	0
Clostridiales	135	0	0	0	0	0	0	0	0	0	0	0	0	0	0	0	0	0	0	0	0	0	0	0	0	0	0	0	0	0	0	0	0	0	0	0	0	0	0	0	0	0	0	0	0	0	0	0	0
Clostridiales	199	0	0	0	0	0	0	0	0	0	0	0	0	0	0	0	0	0	0	0	0	0	0	1	0	0	0	0	0	0	0	0	0	0	0	0	0	0	0	0	0	0	0	0	0	0	0	0	0
Clostridiales	994	0	0	0	0	0	0	0	0	0	0	0	0	0	0	0	0	0	0	0	0	0	0	0	0	0	0	0	0	1	0	0	0	0	0	0	0	0	0	0	0	0	0	0	0	0	0	0	0
Clostridiales	1150	0	0	0	0	0	0	0	0	0	0	0	0	0	0	0	0	0	0	0	0	0	0	0	0	0	0	0	0	0	0	0	0	0	0	0	0	0	0	0	0	0	0	0	0	0	0	0	0
Clostridiales	1164	0	0	0	0	0	0	0	0	0	0	0	0	0	0	0	0	0	0	0	0	0	0	0	0	0	0	0	0	0	0	0	0	0	0	0	0	0	0	0	0	0	0	0	0	0	0	0	2
Clostridiales	1209	0	0	0	0	0	0	0	0	0	0	0	0	0	0	0	0	0	0	0	0	0	0	0	0	2	0	0	0	0	0	0	0	0	0	0	0	0	0	0	0	0	0	0	0	0	0	0	0
Clostridiales	1482	0	0	0	0	0	1	0	0	0	0	0	0	0	0	0	0	0	0	0	0	0	0	0	0	0	0	0	0	0	1	0	0	0	0	0	0	0	0	0	0	0	0	0	0	0	0	0	0
Clostridiales	1544	0	0	0	0	0	0	1	0	0	0	0	0	0	0	0	0	0	0	0	0	0	0	0	0	0	0	0	0	0	0	0	0	0	0	0	0	0	0	0	0	0	0	0	0	0	0	0	0
Clostridiales	1699	0	0	0	0	0	0	0	0	0	0	0	0	0	0	0	0	0	0	0	0	0	0	0	0	0	0	2	0	0	0	0	0	0	0	0	0	0	0	0	0	0	0	0	0	0	0	0	0
Clostridiales	1859	0	0	0	0	0	0	0	0	0	0	0	0	0	0	0	0	0	0	0	0	0	0	0	0	0	0	0	0	0	0	0	1	0	0	0	1	0	0	0	0	0	0	0	0	0	0	0	0
Clostridiales	2301	0	0	0	0	0	0	0	0	0	0	0	0	0	0	0	0	0	0	0	0	0	0	0	2	0	0	0	0	0	0	0	0	0	0	0	0	0	0	0	0	0	0	0	0	0	0	0	0
Clostridiales	33	0	0	0	0	0	0	0	0	0	0	0	0	0	0	0	0	0	0	0	0	1	0	0	0	0	0	0	0	0	0	0	0	0	0	0	0	0	0	0	0	0	0	0	0	0	0	0	0
Clostridiales	57	0	0	0	0	0	0	0	0	0	0	0	0	0	0	0	0	0	0	0	0	0	0	0	0	0	0	0	0	0	0	0	1	0	0	0	0	0	0	0	0	0	0	0	0	0	0	0	0
Clostridiales	111	0	0	0	0	0	0	1	0	0	0	0	0	0	0	0	0	0	0	0	0	0	0	0	0	0	0	0	0	0	0	0	0	0	0	0	0	0	0	0	0	0	0	0	0	0	0	0	0
Clostridiales	217	0	0	0	0	0	0	0	0	0	0	0	0	0	0	0	0	0	0	1	0	0	0	0	0	0	0	0	0	0	0	0	0	0	0	0	0	0	0	0	0	0	0	0	0	0	0	0	0
Clostridiales	250	0	0	0	0	0	0	0	0	0	0	0	0	0	0	0	0	0	0	0	0	0	0	0	0	0	0	0	0	0	0	0	0	0	0	0	1	0	0	0	0	0	0	0	0	0	0	0	0
Clostridiales	328	0	0	0	0	0	0	0	0	0	0	0	0	0	0	0	0	0	0	0	0	0	0	0	0	0	0	0	0	0	0	0	0	0	0	0	0	0	0	0	0	0	0	0	0	0	0	0	0
Clostridiales	425	0	0	0	0	0	0	0	0	0	0	0	0	0	0	0	0	0	0	0	0	0	0	0	0	0	0	0	0	0	0	0	0	0	0	0	0	0	0	1	0	0	0	0	0	0	0	0	0
Clostridiales	458	0	0	0	0	0	0	0	0	0	0	0	0	0	0	0	0	0	0	0	0	0	0	0	0	0	1	0	0	0	0	0	0	0	0	0	0	0	0	0	0	0	0	0	0	0	0	0	0
Clostridiales	521	0	0	0	0	0	0	0	0	0	0	0	0	0	0	0	0	0	0	0	0	0	0	0	1	0	0	0	0	0	0	0	0	0	0	0	0	0	0	0	0	0	0	0	0	0	0	0	0
Clostridiales	557	0	0	0	0	0	0	0	0	0	0	0	0	0	0	0	0	0	0	0	0	0	0	0	0	0	0	0	0	0	0	0	0	0	0	0	0	0	0	0	1	0	0	0	0	0	0	0	0
Clostridiales	636	0	0	0	0	0	0	0	0	0	0	0	0	0	0	0	0	0	0	0	0	0	0	0	0	1	0	0	0	0	0	0	0	0	0	0	0	0	0	0	0	0	0	0	0	0	0	0	0
Clostridiales	644	0	0	0	0	0	0	0	0	0	0	0	0	0	0	0	0	0	0	0	0	0	0	0	0	0	0	0	0	0	0	0	1	0	0	0	0	0	0	0	0	0	0	0	0	0	0	0	0
Clostridiales	746	0	0	0	0	0	0	0	0	0	0	0	0	0	0	0	0	0	0	0	0	0	0	0	0	0	0	0	0	0	0	0	0	0	0	0	0	0	0	0	0	0	0	0	0	0	0	0	0
Clostridiales	751	0	0	0	0	0	0	0	0	0	0	0	0	0	0	0	0	0	0	0	0	0	0	0	0	0	0	0	0	0	0	0	0	0	0	0	0	0	0	0	0	0	0	0	0	0	0	0	0
Clostridiales	767	0	0	0	0	0	0	0	0	0	0	0	0	0	0	0	1	0	0	0	0	0	0	0	0	0	0	0	0	0	0	0	0	0	0	0	0	0	0	0	0	0	0	0	0	0	0	0	0
Clostridiales	809	0	0	0	0	0	0	0	0	0	0	0	0	0	0	0	0	0	0	0	0	0	0	0	0	0	0	0	0	0	0	0	0	0	0	0	0	0	0	0	0	0	0	0	0	0	0	0	0
Clostridiales	810	0	0	0	0	0	0	0	0	0	0	0	0	0	0	0	0	0	0	0	0	0	0	0	0	0	0	0	0	0	0	0	0	0	0	0	0	0	0	0	0	0	0	0	0	0	0	0	0
Clostridiales	817	0	0	0	0	0	0	0	0	0	0	0	0	0	0	0	0	0	0	0	0	0	0	0	0	1	0	0	0	0	0	0	0	0	0	0	0	0	0	0	0	0	0	0	0	0	0	0	0
Clostridiales	856	0	0	0	0	0	0	0	0	0	0	0	0	0	0	0	0	0	0	0	0	0	0	1	0	0	0	0	0	0	0	0	0	0	0	0	0	0	0	0	0	0	0	0	0	0	0	0	0
Clostridiales	868	0	0	0	0	0	0	0	0	0	0	0	0	0	0	0	0	0	0	1	0	0	0	0	0	0	0	0	0	0	0	0	0	0	0	0	0	0	0	0	0	0	0	0	0	0	0	0	0
Clostridiales	880	0	0	0	0	0	0	0	0	0	0	0	0	0	0	0	0	0	0	0	0	0	0	0	0	1	0	0	0	0	0	0	0	0	0	0	0	0	0	0	0	0	0	0	0	0	0	0	0
Clostridiales	928	0	0	0	0	0	0	0	0	0	0	0	0	0	0	0	0	0	0	0	0	0	0	0	0	0	0	0	0	0	0	0	0	0	0	0	0	0	0	0	0	0	0	0	0	0	0	0	0
Clostridiales	951	0	0	0	0	0	0	0	0	0	0	0	0	0	0	0	0	0	0	0	0	0	0	0	0	0	0	0	0	0	0	0	0	0	0	0	0	0	0	0	0	0	0	0	0	0	0	0	0
Clostridiales	957	0	0	0	0	0	0	0	0	0	0	0	0	0	0	0	0	0	0	0	0	0	0	0	0	0	0	0	0	0	0	0	0	0	0	0	0	0	0	0	0	0	0	0	0	0	0	0	0
Clostridiales	988	0	0	0	0	0	0	0	0	0	0	0	0	0	0	0	0	0	0	0	0	0	0	0	0	0	0	0	0	0	0	0	0	0	0	0	0	0	1	0	0	0	0	0	0	0	0	0	0
Clostridiales	1025	0	0	0	0	0	0	1	0	0	0	0	0	0	0	0	0	0	0	0	0	0	0	0	0	0	0	0	0	0	0	0	0	0	0	0	0	0	0	0	0	0	0	0	0	0	0	0	0
Clostridiales	1033	0	0	0	0	0	0	0	0	0	0	0	0	0	0	0	0	0	0	0	0	0	0	0	0	0	0	0	0	0	0	0	0	0	0	0	1	0	0	0	0	0	0	0	0	0	0	0	0
Clostridiales	1054	0	0	0	0	0	0	0	0	0	0	0	0	0	0	0	0	0	0	0	0	0	0	0	0	1	0	0	0	0	0	0	0	0	0	0	0	0	0	0	0	0	0	0	0	0	0	0	0
Clostridiales	1062	0	0	0	0	0	0	0	0	0	1	0	0	0	0	0	0	0	0	0	0	0	0	0	0	0	0	0	0	0	0	0	0	0	0	0	0	0	0	0	0	0	0	0	0	0	0	0	0
Clostridiales	1069	0	0	0	0	0	0	0	0	0	0	0	1	0	0	0	0	0	0	0	0	0	0	0	0	0	0	0	0	0	0	0	0	0	0	0	0	0	0	0	0	0	0	0	0	0	0	0	0
Clostridiales	1121	0	1	0	0	0	0	0	0	0	0	0	0	0	0	0	0	0	0	0	0	0	0	0	0	0	0	0	0	0	0	0	0	0	0	0	0	0	0	0	0	0	0	0	0	0	0	0	0
Clostridiales	1145	0	0	0	0	0	0	0	0	0	0	0	0	0	0	0	0	0	0	0	0	0	0	0	0	1	0	0	0	0	0	0	0	0	0	0	0	0	0	0	0	0	0	0	0	0	0	0	0
Clostridiales	1172	0	0	0	0	0	0	0	0	0	0	0	0	0	0	0	0	0	0	0	0	0	0	0	0	0	0	0	1	0	0	0	0	0	0	0	0	0	0	0	0	0	0	0	0	0	0	0	0
Clostridiales	1180	0	0	0	0	0	0	0	0	0	0	0	0	0	0	0	0	0	0	1	0	0	0	0	0	0	0	0	0	0	0	0	0	0	0	0	0	0	0	0	0	0	0	0	0	0	0	0	0
Clostridiales	1218	0	0	0	0	0	0	0	0	0	0	0	0	0	0	0	0	0	0	0	0	0	0	0	0	0	0	0	0	0	0	0	0	0	0	0	0	0	0	0	0	0	0	0	0	0	0	0	0
Clostridiales	1236	0	0	0	0	0	0	1	0	0	0	0	0	0	0	0	0	0	0	0	0	0	0	0	0	0	0	0	0	0	0	0	0	0	0	0	0	0	0	0	0	0	0	0	0	0	0	0	0
Clostridiales	1266	0	0	0	0	0	0	0	0	0	0	0	0	0	0	0	1	0	0	0	0	0	0	0	0	0	0	0	0	0	0	0	0	0	0	0	0	0	0	0	0	0	0	0	0	0	0	0	0
Clostridiales	1409	0	0	0	0	0	0	0	0	0	0	0	0	0	0	0	0	0	0	0	0	0	0	0	0	0	0	0	0	1	0	0	0	0	0	0	0	0	0	0	0	0	0	0	0	0	0	0	0
Clostridiales	1424	0	0	0	0	0	0	0	0	0	0	0	0	0	0	0	0	0	0	0	0	0	0	0	0	0	0	0	0	0	0	0	0	0	0	0	0	0	0	0	0	0	0	0	0	0	0	0	0
Clostridiales	1433	0	0	0	0	0	0	0	0	0	0	0	0	0	0	0	0	0	0	0	0	0	0	0	1	0	0	0	0	0	0	0	0	0	0	0	0	0	0	0	0	0	0	0	0	0	0	0	0
Clostridiales	1539	0	0	0	0	0	0	1	0	0	0	0	0	0	0	0	0	0	0	0	0	0	0	0	0	0	0	0	0	0	0	0	0	0	0	0	0	0	0	0	0	0	0	0	0	0	0	0	0
Clostridiales	1554	0	0	0	0	0	0	0	0	0	0	0	0	0	0	0	0	0	0	0	0	0	0	0	0	0	0	0	0	0	0	0	0	0	0	0	0	0	0	0	0	0	0	0	0	0	0	0	1
Clostridiales	1571	0	0	0	0	0	0	0	0	0	0	0	0	0	0	0	0	0	0	0	0	0	0	0	0	0	0	0	0	0	0	0	0	0	0	0	0	0	0	0	0	0	0	0	0	0	0	0	0
Clostridiales	1572	0	0	0	0	0	0	0	0	0	0	0	0	0	0	0	1	0	0	0	0	0	0	0	0	0	0	0	0	0	0	0	0	0	0	0	0	0	0	0	0	0	0	0	0	0	0	0	0
Clostridiales	1651	0	0	0	0	0	0	0	0	0	0	0	0	0	0	0	0	0	0	0	0	0	0	0	0	1	0	0	0	0	0	0	0	0	0	0	0	0	0	0	0	0	0	0	0	0	0	0	0
Clostridiales	1669	0	0	0	0	0	0	0	0	0	0	0	0	0	0	0	0	0	0	0	0	0	0	0	0	0	0	0	0	0	0	0	0	0	0	0	1	0	0	0	0	0	0	0	0	0	0	0	0
Clostridiales	1797	0	0	0	0	0	0	0	0	0	0	0	0	0	0	0	0	0	0	0	0	0	0	0	0	1	0	0	0	0	0	0	0	0	0	0	0	0	0	0	0	0	0	0	0	0	0	0	0
Clostridiales	1807	0	0	0	0	0	0	0	0	0	0	0	0	0	0	0	0	0	0	0	0	0	1	0	0	0	0	0	0	0	0	0	0	0	0	0	0	0	0	0	0	0	0	0	0	0	0	0	0
Clostridiales	1910	0	0	0	0	0	0	0	0	0	0	0	0	0	0	0	0	0	0	0	0	0	0	0	0	0	0	0	0	0	0	0	0	0	0	0	1	0	0	0	0	0	0	0	0	0	0	0	0
Clostridiales	1945	0	0	0	0	0	0	0	0	0	0	0	0	0	0	0	0	0	0	0	0	0	0	0	0	0	0	0	0	0	0	0	0	0	0	0	0	0	0	0	1	0	0	0	0	0	0	0	0
Clostridiales	1996	0	0	0	0	0	0	0	0	0	0	0	0	0	0	0	0	0	0	0	1	0	0	0	0	0	0	0	0	0	0	0	0	0	0	0	0	0	0	0	0	0	0	0	0	0	0	0	0
Clostridiales	2014	0	0	0	0	0	0	0	0	0	0	0	0	0	0	0	0	0	0	0	0	0	0	0	0	1	0	0	0	0	0	0	0	0	0	0	0	0	0	0	0	0	0	0	0	0	0	0	0
Clostridiales	2028	0	0	0	0	0	0	0	0	0	0	0	0	0	0	0	0	0	0	0	0	0	0	0	0	1	0	0	0	0	0	0	0	0	0	0	0	0	0	0	0	0	0	0	0	0	0	0	0
Clostridiales	2029	0	0	0	0	0	0	0	0	0	0	0	0	0	0	0	0	0	0	0	0	1	0	0	0	0	0	0	0	0	0	0	0	0	0	0	0	0	0	0	0	0	0	0	0	0	0	0	0
Clostridiales	2133	0	0	0	0	0	0	0	0	0	0	0	0	0	0	0	0	0	0	0	0	0	0	0	0	0	0	0	0	0	0	0	0	0	0	0	0	0	0	0	0	0	0	0	1	0	0	0	0
Clostridiales	2147	1	0	0	0	0	0	0	0	0	0	0	0	0	0	0	0	0	0	0	0	0	0	0	0	0	0	0	0	0	0	0	0	0	0	0	0	0	0	0	0	0	0	0	0	0	0	0	0
Clostridiales	2163	0	0	0	0	0	0	0	0	0	0	0	0	0	0	0	0	0	0	0	0	0	0	0	0	0	0	0	0	0	0	0	0	0	0	0	0	0	0	0	1	0	0	0	0	0	0	0	0
Clostridiales	2220	0	0	0	0	0	0	0	0	0	0	0	0	0	0	0	0	0	0	0	0	0	0	0	0	0	0	0	0	1	0	0	0	0	0	0	0	0	0	0	0	0	0	0	0	0	0	0	0
Clostridiales	2236	0	0	0	0	0	0	0	0	0	0	0	0	0	0	0	0	0	0	0	0	0	0	0	0	0	0	0	0	0	0	0	0	0	0	0	0	0	0	1	0	0	0	0	0	0	0	0	0
Clostridiales	2241	0	0	0	0	0	0	0	0	0	0	0	0	0	0	0	0	0	0	0	0	0	0	0	0	0	0	0	0	0	0	0	0	0	0	0	0	0	0	0	1	0	0	0	0	0	0	0	0
Clostridiales	2292	0	0	0	0	0	0	1	0	0	0	0	0	0	0	0	0	0	0	0	0	0	0	0	0	0	0	0	0	0	0	0	0	0	0	0	0	0	0	0	0	0	0	0	0	0	0	0	0
Clostridiales	2357	0	0	0	0	0	0	0	0	0	0	0	0	0	0	0	0	0	0	0	0	0	0	0	1	0	0	0	0	0	0	0	0	0	0	0	0	0	0	0	0	0	0	0	0	0	0	0	0
Clostridia	2137	0	0	0	0	0	0	0	0	0	0	0	2	2	4	0	0	0	0	0	0	0	0	0	0	15	0	0	0	0	0	0	13	0	4	0	6	0	0	0	0	0	0	0	0	0	0	0	5
Clostridia	96	0	0	0	0	0	0	0	0	0	0	0	0	0	0	0	0	0	0	0	0	0	1	0	0	0	0	0	0	0	0	0	0	0	0	0	0	0	0	0	0	0	0	0	0	0	0	0	0
Clostridia	2348	0	0	0	0	1	0	0	0	0	0	0	0	0	0	0	0	0	0	0	0	0	0	0	0	0	0	0	0	0	0	0	0	0	0	0	0	0	0	0	0	0	0	0	0	0	0	0	0
Clostridia	215	0	0	0	0	0	0	0	0	0	0	0	0	0	0	0	0	0	0	0	0	0	1	0	0	0	0	0	0	0	0	0	0	0	0	0	0	0	0	0	0	0	0	0	0	0	0	0	0
Clostridia	382	0	0	0	0	0	0	0	0	0	0	0	0	0	0	0	1	0	0	0	0	0	0	0	0	0	0	0	0	0	0	0	0	0	0	0	0	0	0	0	0	0	0	0	0	0	0	0	0
Clostridia	560	0	0	0	0	0	0	0	0	0	0	0	0	0	0	0	0	0	0	0	0	0	0	0	0	0	0	0	0	0	0	0	0	0	0	0	0	0	0	0	1	0	0	0	0	0	0	0	0
Clostridia	675	0	0	0	0	0	0	0	0	0	0	0	0	0	0	0	0	0	0	0	0	0	0	0	1	0	0	0	0	0	0	0	0	0	0	0	0	0	0	0	0	0	0	0	0	0	0	0	0
Clostridia	785	0	0	0	0	0	0	0	0	0	0	0	0	0	0	0	1	0	0	0	0	0	0	0	0	0	0	0	0	0	0	0	0	0	0	0	0	0	0	0	0	0	0	0	0	0	0	0	0
Clostridia	1066	0	0	0	0	0	0	0	0	0	0	0	0	0	0	0	0	0	0	0	0	0	0	0	0	0	0	0	0	0	0	0	0	0	0	0	0	0	0	0	0	0	0	0	0	0	0	0	0
Clostridia	1098	0	0	0	0	0	0	0	0	0	0	0	0	0	0	0	0	0	0	0	0	0	0	0	0	1	0	0	0	0	0	0	0	0	0	0	0	0	0	0	0	0	0	0	0	0	0	0	0
Clostridia	1389	0	0	0	0	0	0	0	0	0	0	0	0	0	0	0	0	0	0	0	0	0	0	1	0	0	0	0	0	0	0	0	0	0	0	0	0	0	0	0	0	0	0	0	0	0	0	0	0
Clostridia	2099	0	0	0	0	0	0	0	0	0	0	0	0	0	0	0	0	0	0	0	0	0	0	0	0	1	0	0	0	0	0	0	0	0	0	0	0	0	0	0	0	0	0	0	0	0	0	0	0
Firmicutes	1796	0	0	0	0	0	0	14	0	0	0	0	0	0	0	0	3	0	0	0	2	1	0	0	5	0	1	1	0	0	0	0	1	0	0	0	2	0	0	0	0	0	2	0	0	0	0	0	4
Firmicutes	136	0	0	0	1	0	0	0	1	0	0	0	1	0	0	0	0	0	0	0	0	0	0	0	0	0	0	0	0	0	1	0	0	0	0	0	0	0	0	0	0	0	0	1	0	0	0	0	0
Firmicutes	2346	0	0	0	0	0	0	0	0	0	0	0	0	0	0	0	0	0	0	0	2	2	0	0	0	0	3	0	2	0	0	0	0	0	0	0	0	0	0	0	0	0	0	0	0	0	0	0	0
Firmicutes	1582	0	0	0	0	0	0	0	0	0	0	0	0	0	0	0	0	0	0	0	0	0	0	0	0	0	0	0	0	0	0	0	0	0	0	0	0	0	1	0	0	0	0	1	0	0	0	0	0
Firmicutes	1077	0	0	0	0	0	0	0	0	0	0	0	0	0	0	0	0	0	0	2	0	0	0	0	0	0	0	0	0	0	0	0	0	0	0	0	0	0	0	0	0	0	0	0	0	0	0	0	0
Firmicutes	1211	1	0	0	0	0	0	1	0	0	0	0	0	0	0	0	0	0	0	0	0	0	0	0	0	0	1	0	0	0	0	0	0	0	0	0	0	0	0	0	0	0	0	0	0	0	0	0	0
Firmicutes	356	0	0	0	0	0	0	1	0	0	0	0	0	0	0	0	0	0	0	0	0	0	0	0	0	0	0	0	0	0	0	0	0	0	0	0	1	0	0	0	0	0	0	0	0	0	0	0	0
Firmicutes	922	0	0	0	0	0	0	0	0	0	0	0	0	0	0	0	1	0	0	0	0	0	0	0	0	0	0	0	0	0	0	0	0	0	0	0	0	0	0	0	1	0	0	0	0	0	0	0	0
Firmicutes	1201	0	0	0	0	0	0	0	0	0	0	0	0	0	0	0	0	0	0	0	0	0	0	0	0	0	0	0	0	0	0	0	0	0	0	0	0	0	0	0	0	0	0	0	0	0	0	0	0
Firmicutes	50	0	0	0	0	0	0	0	0	0	0	0	0	0	0	0	0	0	0	0	0	0	0	0	0	0	0	0	0	0	0	0	0	0	0	0	1	0	0	0	0	0	0	0	0	0	0	0	0
Firmicutes	196	0	0	0	0	0	0	1	0	0	0	0	0	0	0	0	0	0	0	0	0	0	0	0	0	0	0	0	0	0	0	0	0	0	0	0	0	0	0	0	0	0	0	0	0	0	0	0	0
Firmicutes	210	0	0	0	0	0	0	0	0	0	0	0	0	0	0	0	1	0	0	0	0	0	0	0	0	0	0	0	0	0	0	0	0	0	0	0	0	0	0	0	0	0	0	0	0	0	0	0	0
Firmicutes	324	0	0	0	0	0	0	0	0	0	0	0	0	0	0	0	0	0	0	0	0	0	0	0	0	0	0	0	0	0	0	0	0	0	0	0	0	0	0	0	0	0	0	0	0	0	0	0	0
Firmicutes	541	0	0	0	0	0	0	0	0	0	0	0	0	0	0	0	0	0	0	0	0	0	0	0	0	0	0	0	0	0	0	0	1	0	0	0	0	0	0	0	0	0	0	0	0	0	0	0	0
Firmicutes	558	0	0	0	1	0	0	0	0	0	0	0	0	0	0	0	0	0	0	0	0	0	0	0	0	0	0	0	0	0	0	0	0	0	0	0	0	0	0	0	0	0	0	0	0	0	0	0	0
Firmicutes	587	0	0	0	0	0	0	0	0	0	0	0	0	0	0	0	0	0	0	0	0	0	0	0	0	0	0	0	0	0	0	0	0	0	0	0	0	0	0	0	0	0	0	1	0	0	0	0	0
Firmicutes	661	0	0	0	0	0	0	0	0	0	0	0	0	0	0	1	0	0	0	0	0	0	0	0	0	0	0	0	0	0	0	0	0	0	0	0	0	0	0	0	0	0	0	0	0	0	0	0	0
Firmicutes	718	0	0	0	0	0	0	0	0	0	0	0	0	0	0	0	0	0	0	0	0	0	0	0	0	1	0	0	0	0	0	0	0	0	0	0	0	0	0	0	0	0	0	0	0	0	0	0	0
Firmicutes	970	0	0	0	0	0	0	0	0	0	0	0	0	0	0	0	0	0	0	0	0	1	0	0	0	0	0	0	0	0	0	0	0	0	0	0	0	0	0	0	0	0	0	0	0	0	0	0	0
Firmicutes	992	0	0	0	0	0	0	0	0	0	0	0	0	0	0	0	0	0	0	0	0	0	0	0	0	0	0	1	0	0	0	0	0	0	0	0	0	0	0	0	0	0	0	0	0	0	0	0	0
Firmicutes	995	0	0	0	0	0	0	0	0	0	0	0	0	0	0	0	1	0	0	0	0	0	0	0	0	0	0	0	0	0	0	0	0	0	0	0	0	0	0	0	0	0	0	0	0	0	0	0	0
Firmicutes	1051	0	0	0	0	0	0	1	0	0	0	0	0	0	0	0	0	0	0	0	0	0	0	0	0	0	0	0	0	0	0	0	0	0	0	0	0	0	0	0	0	0	0	0	0	0	0	0	0
Firmicutes	1178	0	0	0	0	0	0	0	0	0	0	0	0	0	0	0	0	0	0	0	0	0	0	0	0	0	0	0	0	0	0	0	0	0	0	0	0	0	0	0	0	0	0	1	0	0	0	0	0
Firmicutes	1308	0	0	0	0	0	0	0	0	0	0	0	0	0	0	0	0	0	0	0	0	0	0	0	0	1	0	0	0	0	0	0	0	0	0	0	0	0	0	0	0	0	0	0	0	0	0	0	0
Firmicutes	1369	0	0	0	0	0	0	1	0	0	0	0	0	0	0	0	0	0	0	0	0	0	0	0	0	0	0	0	0	0	0	0	0	0	0	0	0	0	0	0	0	0	0	0	0	0	0	0	0
Firmicutes	1467	0	0	0	0	0	0	0	0	0	0	0	0	0	0	0	0	0	0	0	0	0	0	0	0	0	0	0	0	0	0	0	0	0	0	0	0	0	0	0	0	0	0	0	0	0	0	0	0
Firmicutes	1498	0	0	0	0	0	0	0	0	0	0	0	0	0	0	0	0	0	0	0	0	0	0	0	0	0	0	0	0	0	0	0	0	0	1	0	0	0	0	0	0	0	0	0	0	0	0	0	0
Firmicutes	1563	0	0	0	0	0	0	0	0	0	0	0	0	0	0	0	0	0	0	0	0	0	0	0	1	0	0	0	0	0	0	0	0	0	0	0	0	0	0	0	0	0	0	0	0	0	0	0	0
Firmicutes	1592	0	0	0	0	0	0	0	0	0	0	0	0	0	0	0	0	0	0	0	0	0	0	0	0	0	0	0	0	1	0	0	0	0	0	0	0	0	0	0	0	0	0	0	0	0	0	0	0
Firmicutes	1620	0	0	0	0	0	0	0	0	0	0	0	0	0	0	0	1	0	0	0	0	0	0	0	0	0	0	0	0	0	0	0	0	0	0	0	0	0	0	0	0	0	0	0	0	0	0	0	0
Firmicutes	1647	0	0	0	0	0	0	0	0	0	0	0	0	0	0	0	0	0	0	0	0	0	0	0	0	0	0	0	0	0	0	0	0	0	0	0	0	0	0	0	0	0	0	0	0	0	0	0	0
Firmicutes	1949	0	0	0	0	0	0	0	0	0	0	0	0	0	0	0	0	0	0	0	0	0	0	0	0	1	0	0	0	0	0	0	0	0	0	0	0	0	0	0	0	0	0	0	0	0	0	0	0
Firmicutes	1966	0	0	0	0	0	0	1	0	0	0	0	0	0	0	0	0	0	0	0	0	0	0	0	0	0	0	0	0	0	0	0	0	0	0	0	0	0	0	0	0	0	0	0	0	0	0	0	0
Firmicutes	2056	0	0	0	0	0	0	0	0	0	0	0	0	0	0	0	1	0	0	0	0	0	0	0	0	0	0	0	0	0	0	0	0	0	0	0	0	0	0	0	0	0	0	0	0	0	0	0	0
Firmicutes	2161	0	0	0	0	0	0	0	0	0	0	0	0	0	0	0	0	0	0	0	0	0	0	0	0	0	0	0	0	0	0	0	0	0	0	0	0	0	0	0	0	0	0	0	0	0	0	0	0
Firmicutes	2175	0	0	0	0	0	0	0	0	0	0	0	0	0	0	0	0	0	0	0	0	0	0	0	0	0	0	0	0	1	0	0	0	0	0	0	0	0	0	0	0	0	0	0	0	0	0	0	0
Firmicutes	2225	0	0	0	0	0	0	1	0	0	0	0	0	0	0	0	0	0	0	0	0	0	0	0	0	0	0	0	0	0	0	0	0	0	0	0	0	0	0	0	0	0	0	0	0	0	0	0	0
Firmicutes	2240	0	0	0	0	0	0	0	0	0	0	0	0	0	0	0	0	0	0	0	0	0	0	0	0	0	0	0	0	0	0	0	0	0	0	0	0	0	0	0	0	0	0	0	0	0	0	0	0
Firmicutes	2246	0	0	0	0	0	0	1	0	0	0	0	0	0	0	0	0	0	0	0	0	0	0	0	0	0	0	0	0	0	0	0	0	0	0	0	0	0	0	0	0	0	0	0	0	0	0	0	0
Firmicutes	2281	0	0	0	0	0	0	0	0	0	0	0	0	0	0	0	0	0	0	0	0	0	0	0	0	0	0	0	0	0	0	0	1	0	0	0	0	0	0	0	0	0	0	0	0	0	0	0	0
Firmicutes	2286	0	0	0	0	0	0	0	0	0	1	0	0	0	0	0	0	0	0	0	0	0	0	0	0	0	0	0	0	0	0	0	0	0	0	0	0	0	0	0	0	0	0	0	0	0	0	0	0
Fusobacterium	2153	0	0	0	0	0	0	0	0	0	0	5	0	0	0	0	0	0	0	0	0	0	0	0	0	0	1	0	0	0	0	1	0	0	0	0	0	1	0	0	0	1	10	3	0	0	0	0	2
Fusobacterium	506	0	0	0	0	0	0	1	0	0	0	0	0	0	0	0	0	0	0	0	0	0	0	0	0	0	0	0	0	0	0	0	0	0	0	0	0	0	0	0	0	0	0	0	0	0	0	0	0
Leptotrichia	1101	0	0	0	0	0	0	0	0	0	0	0	0	0	0	0	0	0	0	0	0	0	0	0	0	0	0	0	0	0	0	0	0	0	0	0	0	0	0	0	0	0	0	0	0	0	0	0	0
Leptotrichia	125	0	0	0	0	0	0	0	0	0	0	0	0	0	0	0	0	0	0	0	0	0	0	0	0	0	0	0	0	0	0	0	0	0	0	0	0	0	0	0	0	0	0	2	0	0	0	0	0
Leptotrichia	233	0	0	0	0	0	0	0	0	0	0	0	0	0	0	0	0	0	0	0	0	0	0	0	0	0	0	0	0	0	0	0	0	0	0	0	0	0	0	0	0	0	0	0	0	0	0	0	0
Leptotrichia	1190	0	0	0	0	0	0	0	0	0	0	0	0	0	0	0	0	0	0	0	0	0	0	0	0	0	0	0	0	0	0	0	0	0	0	0	0	0	0	0	0	0	0	0	0	0	0	0	0
Leptotrichia	2055	0	0	0	0	0	0	0	0	0	0	0	0	0	0	0	0	0	0	0	0	0	0	0	0	0	0	0	0	0	0	0	0	0	0	0	0	0	0	0	0	0	0	1	0	0	0	0	0
Brevundimonas	1850	0	0	0	0	0	0	0	0	0	0	0	0	0	0	0	0	0	0	0	0	0	0	0	0	0	0	0	0	0	0	0	0	0	1	0	0	0	3	5	0	0	0	0	0	0	6	4	0
Brevundimonas	1118	0	0	0	0	0	0	0	0	0	0	0	0	0	0	0	0	0	0	0	0	0	0	0	0	0	0	0	0	0	0	0	0	0	0	0	0	0	0	0	0	0	0	0	0	0	1	0	0
Brevundimonas	658	0	0	0	0	0	0	0	0	0	0	0	0	0	0	0	0	0	0	0	0	0	0	0	0	0	0	0	0	0	0	0	0	0	0	0	0	0	0	0	0	0	0	0	0	0	0	0	0
Brevundimonas	214	0	0	0	0	0	0	0	0	0	0	0	0	0	0	0	0	0	0	0	0	0	0	0	0	0	0	0	0	0	0	0	0	0	0	0	0	0	0	0	0	0	0	0	0	0	0	0	0
Brevundimonas	479	0	0	0	0	0	0	0	0	0	0	0	0	0	0	0	0	0	0	0	0	0	0	0	0	0	0	0	0	0	0	0	0	0	0	0	0	0	0	0	0	0	0	0	0	0	1	0	0
Brevundimonas	689	0	0	0	0	0	0	0	0	0	0	0	0	0	0	0	0	0	0	0	0	0	0	0	0	0	0	0	0	0	0	0	0	0	0	0	0	0	0	0	0	0	0	0	0	0	0	0	0
Brevundimonas	1208	0	0	0	0	0	0	0	1	0	0	0	0	0	0	0	0	0	0	0	0	0	0	0	0	0	0	0	0	0	0	0	0	0	0	0	0	0	0	0	0	0	0	0	0	0	0	0	0
Caulobacter	2076	0	0	0	0	0	0	0	1	0	0	0	0	0	0	0	0	0	0	0	0	0	0	0	0	0	0	0	0	0	0	0	0	0	0	0	0	0	0	0	0	0	0	2	0	0	0	0	0
Phenylobacterium	228	0	0	0	0	0	0	0	0	5	5	0	3	9	2	0	0	1	1	0	0	0	0	0	0	0	0	0	0	0	2	0	0	0	0	0	0	0	0	0	0	0	0	0	0	0	0	0	0
Phenylobacterium	600	0	0	0	0	0	0	0	0	0	0	0	0	0	0	0	0	0	0	0	0	0	0	0	0	0	0	0	0	0	0	0	0	0	0	0	0	0	0	0	0	0	0	0	0	0	0	0	0
Phenylobacterium	1019	0	0	0	0	0	0	0	0	0	0	0	0	0	0	0	0	0	0	0	0	0	0	0	0	0	0	0	0	0	0	0	0	0	0	0	0	0	0	0	0	0	0	0	0	0	0	0	0
Phenylobacterium	1133	0	0	0	0	0	0	0	0	0	0	0	0	0	0	0	0	0	0	0	0	0	0	0	0	0	0	0	0	0	0	0	0	0	0	0	0	0	0	0	0	0	0	0	0	0	0	0	0
Phenylobacterium	1845	0	0	0	0	0	0	0	0	0	0	0	1	0	0	0	0	0	0	0	0	0	0	0	0	0	0	0	0	0	0	0	0	0	0	0	0	0	0	0	0	0	0	0	0	0	0	0	0
Agromonas	1861	0	0	0	0	0	0	0	0	0	0	0	1	0	0	0	0	0	0	0	0	0	0	0	0	0	0	0	0	0	0	0	0	0	0	0	0	0	0	0	0	0	0	0	0	0	0	0	0
Bosea	858	0	0	0	0	0	0	0	0	0	0	0	0	0	0	0	0	0	0	0	0	0	0	0	0	0	0	0	0	0	0	0	0	0	0	0	0	0	0	0	0	0	0	1	0	0	0	0	0
Bradyrhizobium	2325	0	0	0	0	0	0	0	0	0	0	0	1	1	0	0	0	0	0	0	0	0	0	0	0	0	0	0	0	0	0	0	0	0	0	0	0	0	0	0	0	0	0	0	0	0	0	0	0
Bradyrhizobiaceae	1046	0	0	0	1	0	2	0	3	4	4	1	8	4	5	0	0	0	2	1	0	0	0	0	0	0	0	0	0	0	0	1	0	0	0	0	0	0	1	0	0	0	0	3	0	0	0	0	0
Bradyrhizobiaceae	1806	0	0	0	0	0	0	0	0	0	0	0	0	0	1	0	0	0	0	0	0	0	0	0	0	0	0	0	0	0	0	0	0	0	0	0	0	0	0	0	0	0	0	0	0	0	0	0	0
Bradyrhizobiaceae	470	0	0	0	0	0	0	0	0	0	0	0	0	0	1	0	0	1	0	0	0	0	0	0	0	0	0	0	0	0	0	0	0	0	0	0	0	0	0	0	0	0	0	0	0	0	0	0	0
Bradyrhizobiaceae	427	0	0	0	0	0	0	0	0	0	0	0	0	0	0	0	0	0	0	0	0	0	0	0	0	0	0	0	0	0	0	0	0	0	0	0	0	0	0	0	0	0	0	0	0	0	0	0	0
Bradyrhizobiaceae	1581	0	0	0	0	0	0	0	0	0	0	0	0	1	0	0	0	0	0	0	0	0	0	0	0	0	0	0	0	0	0	0	0	0	0	0	0	0	0	0	0	0	0	0	0	0	0	0	0
Brucellaceae	641	0	0	0	0	0	0	0	0	1	0	0	0	0	0	0	0	0	0	0	0	0	0	0	0	0	0	0	0	0	0	0	0	0	0	0	0	0	0	0	0	0	0	0	0	0	0	0	0
Hyphomicrobium	1326	0	0	0	0	0	0	0	0	0	0	0	1	0	0	0	0	0	0	0	0	0	0	0	0	0	0	0	0	0	0	0	0	0	0	0	0	0	0	0	0	0	0	0	0	0	0	0	0
Pedomicrobium	1963	0	0	0	0	0	0	0	0	0	0	0	0	0	1	0	0	0	0	0	0	0	0	0	0	0	0	0	0	0	0	0	0	0	0	0	0	0	0	0	0	0	0	0	0	0	0	0	0
Methylobacterium	448	0	0	0	0	0	0	0	1	0	0	1	0	0	0	0	0	0	0	0	0	0	0	0	0	0	0	0	0	0	0	0	0	0	0	0	0	0	0	0	0	0	0	0	0	0	0	0	0
Methylobacterium	358	0	0	0	0	0	0	0	0	0	0	1	0	0	0	0	0	0	0	0	1	0	0	0	0	0	0	0	0	0	0	0	0	0	0	0	0	0	0	0	0	0	0	0	0	0	0	0	0
Methylobacterium	306	0	0	0	0	0	0	0	0	0	0	1	0	0	0	0	0	0	0	0	0	0	0	0	0	0	0	0	0	0	0	0	0	0	0	0	0	0	0	0	0	0	0	0	0	0	0	0	0
Mesorhizobium	1759	0	0	0	0	0	0	0	4	0	0	0	0	2	0	0	0	0	0	0	0	0	0	0	0	0	0	0	0	0	0	0	0	0	0	0	0	0	0	0	0	0	0	0	0	0	0	0	0
Rhizobiales	12	0	0	0	0	0	0	0	0	0	1	0	0	0	0	0	0	0	0	0	0	0	0	0	0	0	0	0	0	0	0	0	0	0	0	0	0	0	0	0	0	0	0	0	0	0	0	0	0
Rhizobiales	139	0	0	0	0	0	0	0	0	0	0	0	0	0	0	0	0	0	0	0	0	0	0	0	0	0	0	0	0	0	0	0	0	0	0	0	0	0	0	0	0	0	0	0	0	0	0	0	0
Rhizobiales	974	0	0	0	0	0	0	0	0	0	0	0	0	1	0	0	0	0	0	0	0	0	0	0	0	0	0	0	0	0	0	0	0	0	0	0	0	0	0	0	0	0	0	0	0	0	0	0	0
Rhizobiales	2074	0	0	0	0	0	0	0	0	0	0	0	0	0	0	0	0	0	0	0	0	0	0	0	0	0	0	0	0	0	0	0	0	0	0	0	0	0	0	0	0	0	0	0	0	0	0	0	0
Rhodobacteraceae	680	0	0	0	0	0	0	0	0	0	1	2	0	0	0	0	0	0	0	1	0	0	0	0	0	0	0	0	0	0	0	0	0	0	0	0	0	0	0	0	0	0	0	0	0	0	0	0	0
Rhodobacteraceae	676	0	0	0	0	0	0	0	0	0	0	3	0	0	0	0	0	0	0	0	0	0	0	0	0	0	0	0	0	0	0	0	0	0	0	0	0	0	0	0	0	0	0	0	0	0	0	0	0
Rhodobacteraceae	795	0	0	0	0	0	0	0	0	0	0	1	1	0	0	0	0	0	0	0	0	0	0	0	0	0	0	0	0	0	0	0	0	0	0	0	0	0	0	0	0	0	0	0	0	0	0	0	0
Rhodobacteraceae	442	0	0	0	0	0	0	0	0	0	0	0	1	0	0	0	0	0	0	0	0	0	0	0	0	0	0	0	0	0	0	0	0	0	0	0	0	0	0	0	0	0	0	0	0	0	0	0	0
Acetobacteraceae	1439	0	0	0	0	0	0	0	0	0	0	0	0	0	0	0	0	0	0	0	0	0	0	0	0	0	0	0	0	0	0	0	0	0	0	0	0	0	0	0	0	0	0	0	0	0	0	0	0
Acetobacteraceae	1305	0	0	0	0	0	0	0	0	0	0	0	0	0	0	0	0	0	0	0	0	0	0	0	0	0	0	0	0	0	1	0	0	0	0	0	0	0	0	0	0	0	0	0	0	0	0	0	0
Skermanella	341	0	0	0	0	0	0	0	0	0	0	3	0	0	0	0	0	0	0	0	0	0	0	0	0	0	0	0	0	0	0	0	0	0	0	0	0	0	0	0	0	0	0	0	0	0	0	0	0
Skermanella	1947	0	0	0	0	0	0	0	0	0	0	1	0	0	0	0	0	0	0	0	0	0	0	0	0	0	0	0	0	0	0	0	0	0	0	0	0	0	0	0	0	0	0	0	0	0	0	0	0
Rhodospirillales	1442	0	0	0	0	0	0	0	0	1	3	0	2	1	0	0	0	1	2	0	1	0	0	0	0	0	0	0	0	0	0	0	0	0	0	0	0	0	0	0	0	0	0	0	0	0	0	0	0
Erythrobacter	2230	0	0	0	0	0	0	0	0	0	0	2	0	0	0	0	0	0	0	0	0	0	0	0	0	0	0	0	0	0	0	0	0	0	0	0	0	0	0	0	0	0	0	0	0	0	0	0	0
Novosphingobium	2104	0	0	0	0	0	0	0	4	1	7	0	4	19	3	0	0	1	4	1	1	0	0	0	0	0	0	0	0	0	0	0	0	1	0	0	0	0	0	0	0	0	0	0	0	0	0	0	0
Sphingobium	2299	0	0	0	0	0	0	0	0	0	0	0	0	0	0	0	0	0	0	0	0	0	0	0	0	0	0	0	0	0	0	0	0	0	0	0	0	0	0	0	0	0	0	0	0	0	0	0	0
Sphingomonas	1972	0	0	0	0	0	0	0	0	0	0	0	0	0	0	0	0	0	0	0	0	0	0	0	0	0	0	0	0	0	0	0	0	0	0	0	0	0	0	0	0	0	0	0	0	0	0	0	0
Sphingomonas	1715	0	0	0	0	0	0	0	0	0	0	7	0	1	0	0	0	0	0	0	0	0	0	0	0	0	0	0	0	0	0	0	0	0	0	1	0	0	1	0	0	0	0	0	0	0	1	0	0
Sphingomonas	1532	0	0	0	0	0	2	0	0	0	0	0	0	0	0	0	0	0	0	0	0	0	0	0	0	0	0	0	0	0	0	0	0	0	0	0	0	0	0	0	0	0	0	1	0	0	0	0	0
Sphingomonas	693	0	0	0	0	0	0	0	0	0	0	0	0	0	1	0	0	0	0	0	0	0	0	0	0	0	0	0	0	0	0	0	0	0	0	0	0	0	0	0	0	0	0	0	0	0	0	0	0
Sphingomonas	989	0	0	0	0	0	0	0	0	0	0	0	0	0	0	0	0	0	0	0	0	0	0	0	0	0	0	0	0	0	0	0	0	2	0	0	0	0	0	0	0	0	0	0	0	0	0	0	0
Sphingomonas	960	0	0	0	0	0	0	0	0	0	0	0	0	0	0	0	0	0	0	0	0	0	0	0	0	0	0	0	0	0	0	0	0	0	0	0	0	0	0	0	0	0	0	0	0	0	0	0	0
Sphingopyxis	134	0	0	0	0	0	0	0	0	0	0	0	0	0	0	0	0	0	0	0	0	0	0	0	0	0	0	0	0	0	0	0	0	0	0	0	0	0	0	1	0	0	0	0	0	0	1	1	0
Sphingopyxis	531	0	0	0	0	0	0	0	0	0	0	1	0	0	0	0	0	0	0	0	0	0	0	0	0	0	0	0	0	0	0	0	0	0	0	0	0	0	0	0	0	0	0	0	0	0	0	0	0
Sphingomonadaceae	84	0	0	0	0	0	0	0	0	0	0	2	0	0	0	0	0	0	0	0	0	0	0	0	0	0	0	0	0	0	0	0	0	0	0	0	0	0	0	0	0	0	0	0	0	0	0	0	0
Sphingomonadaceae	781	0	0	0	0	0	0	0	0	0	0	0	0	0	0	0	0	0	0	0	0	0	0	0	0	0	0	0	0	0	0	0	0	0	0	0	0	0	0	0	0	0	0	0	0	0	0	0	0
Sphingomonadaceae	827	0	0	0	0	0	0	0	0	0	0	0	0	0	0	0	0	0	0	0	0	0	0	0	0	0	0	0	0	0	0	0	0	0	0	0	0	0	0	0	0	0	0	0	0	0	0	0	0
Sphingomonadaceae	1036	0	0	0	0	0	0	0	0	0	0	0	0	0	0	0	0	0	0	0	0	0	0	0	0	0	0	0	0	0	0	0	0	0	0	0	0	0	0	0	0	0	0	0	0	0	0	0	0
Sphingomonadaceae	2130	0	0	0	0	0	0	0	0	0	0	1	0	0	0	0	0	0	0	0	0	0	0	0	0	0	0	0	0	0	0	0	0	0	0	0	0	0	0	0	0	0	0	0	0	0	0	0	0
Alphaproteobacteria	278	0	0	0	0	0	0	0	0	0	0	0	1	0	0	0	0	0	0	0	0	0	0	0	0	0	0	0	0	0	0	0	0	0	0	0	0	0	0	0	0	0	0	0	0	0	0	0	0
Alphaproteobacteria	905	0	0	0	0	0	0	0	0	0	0	0	0	0	0	0	0	0	0	0	0	0	0	0	0	0	0	0	1	0	0	0	0	0	0	0	0	0	0	0	0	0	0	0	0	0	0	0	0
Achromobacter	105	0	0	0	0	0	0	0	0	0	13	0	0	0	0	0	0	0	0	0	0	0	0	0	0	0	0	0	0	0	0	0	0	0	0	0	0	0	0	0	0	0	0	0	0	0	0	0	0
Sutterella	115	0	0	0	0	0	0	0	0	0	0	0	0	0	0	0	0	0	0	0	0	0	0	0	0	0	0	0	0	0	0	0	0	0	0	0	0	0	0	0	0	0	0	0	0	0	0	0	0
Alcaligenaceae	741	0	0	0	0	0	0	0	0	0	0	0	0	0	0	0	0	0	0	0	0	0	1	0	0	0	0	0	0	0	0	0	0	0	0	0	0	0	0	0	0	0	0	0	0	0	0	0	0
Burkholderia	593	0	0	0	0	0	0	0	0	0	0	0	0	0	0	0	0	0	0	0	0	0	0	0	0	0	0	0	0	0	0	0	0	0	0	0	0	0	0	0	0	0	0	0	0	0	0	0	0
Cupriavidus	1891	0	1	0	0	0	0	0	0	0	0	0	0	0	0	0	0	0	0	0	0	0	0	0	0	0	0	0	0	0	0	0	0	0	0	0	0	0	0	0	0	0	0	0	0	0	0	0	0
Limnobacter	1508	0	0	0	0	0	0	0	0	0	0	0	0	0	1	0	0	0	0	0	0	0	0	0	0	0	0	0	0	0	0	0	0	0	0	0	0	0	0	0	0	0	0	0	0	0	0	0	0
Ralstonia	1567	0	0	0	0	0	2	0	0	1	0	1	0	6	0	0	0	0	0	0	0	0	0	1	0	0	0	0	0	0	2	0	0	0	0	2	0	0	0	0	0	0	0	0	0	0	0	0	0
Wautersia	1390	0	0	0	0	0	0	0	0	0	0	0	0	0	0	0	0	0	0	0	0	0	0	0	0	0	0	0	0	0	0	0	0	0	0	0	0	0	0	0	0	0	0	0	0	0	0	0	0
Wautersia	2311	0	0	0	0	0	0	0	0	0	0	0	0	0	0	0	0	0	0	0	0	0	0	0	0	0	0	0	0	0	0	0	0	0	0	0	0	0	0	0	0	0	0	0	0	0	0	0	0
Burkholderiaceae	690	0	0	0	0	0	0	0	0	0	0	0	0	0	0	0	0	0	0	0	0	0	0	0	0	0	0	0	0	0	0	0	0	0	0	0	0	0	0	0	0	0	0	0	0	0	0	0	0
Burkholderiaceae	1045	0	0	0	0	0	0	0	0	0	0	0	0	0	0	0	0	0	0	0	0	0	0	0	0	0	0	0	0	0	0	0	0	0	0	0	0	0	0	0	0	0	0	0	0	0	0	0	0
Caenibacterium	1709	1	0	0	0	0	0	0	0	0	0	0	0	0	0	0	0	0	0	0	0	0	0	0	0	0	0	1	0	0	0	0	0	0	0	0	0	0	0	0	0	0	0	0	0	0	0	0	0
Polaromonas	1068	0	0	0	0	0	0	0	0	0	0	0	0	0	0	0	0	0	0	0	0	0	0	0	0	0	0	0	0	0	0	0	0	0	0	0	0	0	0	0	0	0	0	0	0	0	0	0	0
Comamonadaceae	2184	0	0	0	0	0	0	0	0	0	0	0	2	0	0	0	0	0	0	0	0	0	0	0	0	0	0	0	0	0	0	0	0	0	1	0	0	0	0	0	0	0	0	1	0	0	0	0	0
Comamonadaceae	6	0	0	0	0	0	0	0	0	0	0	0	0	0	0	0	0	0	0	0	0	0	0	0	0	0	0	0	0	0	0	0	0	0	0	0	0	0	0	0	0	0	0	0	0	0	0	0	0
Aquabacterium	175	0	0	0	0	0	3	0	0	3	0	0	1	2	0	0	0	0	0	0	0	0	0	0	0	0	0	0	0	0	0	0	0	0	0	1	0	0	0	0	0	0	0	4	0	0	0	0	0
Aquabacterium	392	0	0	0	0	0	0	0	0	0	0	0	4	0	0	0	0	0	0	0	0	0	0	0	0	0	0	0	0	0	0	0	0	0	0	0	0	0	0	0	0	0	0	0	0	0	0	0	0
Pelomonas	1401	0	0	0	0	0	0	0	0	0	0	0	0	0	0	0	0	1	0	0	0	0	0	0	0	0	0	0	0	0	0	0	0	0	0	0	0	0	0	0	0	0	0	0	0	0	0	0	0
Incertae sedis 5	2310	0	0	0	0	0	0	0	0	0	0	0	0	0	0	0	0	0	0	0	0	0	0	0	0	0	0	0	0	0	0	0	0	0	0	0	0	0	0	0	0	0	0	0	0	0	0	0	0
Janthinobacterium	1474	0	0	0	0	0	0	0	0	0	0	0	0	0	0	0	0	0	0	0	0	0	0	0	0	0	0	0	0	0	0	0	0	0	0	0	0	0	0	2	0	0	0	0	0	0	0	0	0
Oxalobacteraceae	1252	0	0	0	0	0	0	0	0	0	0	0	0	0	0	0	0	0	0	0	0	0	0	0	0	0	0	0	0	0	0	0	0	0	0	0	0	0	0	1	0	0	0	0	0	1	1	1	0
Oxalobacteraceae	1989	0	0	0	0	0	0	0	0	0	0	0	0	0	0	0	0	0	0	0	0	0	0	0	0	0	0	0	0	0	0	0	0	0	0	0	0	0	0	0	0	0	0	0	0	0	0	0	0
Burkholderiales	1301	0	0	0	0	0	1	0	1	0	0	0	0	0	0	0	0	0	0	0	0	0	0	0	0	0	0	0	0	0	0	0	0	0	0	0	0	1	3	0	0	0	0	0	0	0	1	9	0
Burkholderiales	259	0	0	0	0	0	0	0	0	0	0	0	0	0	0	0	0	0	0	0	0	0	0	0	0	0	0	0	0	0	0	0	0	0	0	0	0	0	0	0	0	0	0	0	0	0	0	0	0
Burkholderiales	1782	0	0	0	0	0	0	0	0	0	0	4	1	3	0	0	0	0	0	1	0	0	0	0	0	0	0	0	0	0	1	0	0	0	0	1	0	0	7	0	0	0	0	0	2	0	0	0	0
Burkholderiales	1394	0	0	0	0	0	0	0	0	0	0	1	0	0	0	0	0	1	0	0	0	0	0	0	0	0	0	1	0	0	0	0	0	0	0	0	0	0	0	0	0	0	0	2	0	0	0	0	0
Burkholderiales	2065	0	0	0	0	0	0	0	0	0	0	0	0	0	0	0	0	0	0	0	0	0	0	0	0	0	0	0	0	0	0	0	0	0	0	0	0	0	0	0	0	0	0	0	0	0	0	0	0
Burkholderiales	1729	0	0	0	0	0	0	0	0	0	0	0	0	0	0	0	0	0	0	0	0	0	0	0	0	0	0	0	0	0	0	0	0	0	0	0	0	0	0	0	0	0	0	0	0	0	0	0	0
Burkholderiales	1785	0	0	0	0	0	0	0	0	0	0	0	0	0	0	0	0	0	0	0	0	0	0	0	0	0	0	0	0	0	0	0	0	1	0	0	0	0	0	0	0	0	0	1	0	0	0	0	0
Burkholderiales	128	0	0	0	0	0	0	0	0	0	0	0	0	0	0	0	0	0	0	0	0	0	0	0	0	0	0	0	0	0	0	0	0	0	0	0	0	0	0	0	0	0	0	0	0	0	0	0	0
Burkholderiales	513	0	0	0	0	0	0	0	0	0	0	0	0	0	0	0	0	0	0	0	0	0	0	0	0	0	0	0	0	0	0	0	0	0	0	0	0	0	0	0	0	0	0	0	0	0	0	0	0
Burkholderiales	1060	0	0	0	0	0	0	0	0	0	0	0	0	0	0	0	0	0	0	0	0	0	0	0	0	0	0	0	0	0	0	0	0	0	0	0	0	0	0	0	0	0	0	1	0	0	0	0	0
Burkholderiales	1307	0	0	0	0	0	0	0	0	0	0	0	0	0	0	0	0	0	0	0	0	0	0	0	0	0	0	0	0	0	0	0	0	0	0	0	0	0	0	0	0	0	0	0	0	0	0	0	0
Burkholderiales	1649	0	0	0	0	0	0	0	0	0	0	0	0	0	0	0	0	0	0	0	0	0	0	0	0	0	0	0	0	0	0	0	0	0	0	0	0	0	0	0	0	0	0	0	0	0	0	0	0
Burkholderiales	1726	0	0	0	0	0	0	0	0	0	0	0	0	0	0	0	0	0	0	0	0	0	0	0	0	0	0	0	0	0	0	0	0	0	0	0	0	0	0	0	0	0	0	1	0	0	0	0	0
Methylophilaceae	1461	0	0	0	0	0	0	0	0	2	0	0	3	5	1	0	0	0	2	0	0	0	0	0	0	0	0	0	0	0	0	0	0	0	0	0	0	0	0	0	0	0	0	0	0	0	0	0	0
Neisseria	1831	0	0	0	0	0	0	0	0	0	0	0	0	0	0	0	0	0	0	0	0	0	0	0	0	0	0	0	0	0	0	0	0	1	0	0	0	0	0	0	0	0	0	2	0	0	0	0	0
Neisseriaceae	488	0	0	0	0	0	0	0	0	0	0	0	0	0	0	0	0	0	0	0	0	0	0	0	0	0	0	0	0	0	0	0	0	0	0	0	0	0	0	0	0	0	0	1	0	0	0	0	0
Neisseriaceae	662	0	0	0	0	0	0	0	0	0	0	0	0	0	0	0	0	0	0	0	0	0	0	0	0	0	0	0	0	0	0	0	0	0	0	0	0	0	0	0	0	0	0	0	0	0	0	0	0
Neisseriaceae	2332	0	0	0	0	0	0	0	0	0	0	0	0	0	0	0	0	0	0	0	0	0	0	0	0	0	0	0	0	0	0	0	0	0	0	0	0	0	0	0	0	0	0	0	0	0	0	0	0
Nitrosomonas	1384	0	0	0	0	0	0	0	0	0	0	0	0	0	0	0	0	0	0	0	0	0	0	0	0	0	0	0	0	0	0	0	0	0	0	0	0	0	0	0	0	0	0	0	0	0	0	0	0
Zoogloea	700	0	0	0	0	0	0	0	0	0	0	0	0	0	0	0	0	0	0	0	0	0	0	0	0	0	0	0	0	0	0	0	0	0	0	1	0	0	0	0	0	0	0	2	0	0	0	0	0
Rhodocyclaceae	1961	0	0	0	0	0	0	0	0	0	0	2	0	0	0	0	0	0	0	0	0	0	0	0	0	0	0	0	0	0	0	0	0	0	0	0	0	0	0	0	0	0	0	3	0	0	1	0	0
Betaproteobacteria	226	0	0	0	0	0	0	0	0	2	0	0	0	0	0	0	0	0	0	0	0	0	0	0	0	0	0	0	0	0	0	0	0	0	0	0	0	1	0	1	0	0	0	0	0	0	0	0	0
Betaproteobacteria	127	0	0	0	0	0	0	0	0	0	0	0	0	1	0	0	0	0	0	0	0	0	0	0	0	0	0	0	0	0	0	0	0	0	0	0	0	0	0	0	0	0	0	0	0	0	0	0	0
Betaproteobacteria	1073	0	0	0	0	0	0	0	0	0	0	0	0	1	0	0	0	0	0	0	0	0	0	0	0	0	0	0	0	0	0	0	0	0	0	0	0	0	0	0	0	0	0	0	0	0	0	0	0
Betaproteobacteria	1407	0	0	0	0	0	0	0	0	0	0	0	0	1	0	0	0	0	0	0	0	0	0	0	0	0	0	0	0	0	0	0	0	0	0	0	0	0	0	0	0	0	0	0	0	0	0	0	0
Bilophila	1614	0	0	0	0	0	0	0	0	0	0	0	0	0	0	0	0	0	0	0	0	0	0	0	0	0	0	0	0	0	0	0	0	0	0	0	0	0	0	0	0	0	0	0	0	0	0	0	0
Desulfovibrio	1537	0	0	0	0	0	0	0	0	0	0	0	0	0	0	0	0	0	0	0	0	0	0	0	0	0	0	0	0	0	0	0	0	0	0	0	0	0	0	0	0	0	0	0	0	0	0	0	0
Desulfovibrio	1256	0	0	0	0	0	0	0	0	0	0	0	0	0	0	0	0	0	0	0	0	0	0	0	0	0	0	0	0	0	0	0	0	0	0	0	0	0	0	0	0	0	0	0	0	0	0	0	0
Polyangiaceae	1618	0	0	0	0	0	0	0	1	0	0	0	0	0	2	0	0	0	0	0	0	0	0	0	0	0	0	0	0	0	0	0	0	0	0	0	0	0	0	0	0	0	0	0	0	0	0	0	0
Polyangiaceae	2255	0	0	0	0	0	0	0	0	0	0	0	2	0	0	0	0	0	0	0	0	0	0	0	0	0	0	0	0	0	0	0	0	0	0	0	0	0	0	0	0	0	0	0	0	0	0	0	0
Myxococcales	2154	0	0	0	0	0	0	0	0	1	0	0	1	0	0	0	0	0	0	0	0	0	0	0	0	0	0	0	0	0	0	0	0	0	0	0	0	0	0	0	0	0	0	0	0	0	0	0	0
Deltaproteobacteria	1830	0	0	0	0	0	0	0	0	0	0	0	0	0	0	0	0	0	0	0	0	0	0	0	0	0	0	0	0	0	0	0	0	0	0	0	0	0	0	0	0	0	0	0	0	0	0	0	0
Campylobacter	2300	7	4	0	0	5	2	5	0	0	1	0	2	1	0	0	4	0	0	0	3	0	0	34	0	3	3	2	3	0	2	0	2	12	8	0	16	39	0	2	3	10	3	0	0	0	0	2	4
Campylobacter	1881	0	0	0	0	0	0	0	0	0	0	0	0	0	0	0	0	0	0	0	0	0	0	0	0	0	0	0	0	0	0	0	0	0	0	0	0	0	0	1	5	2	0	0	0	0	0	2	0
Campylobacter	1479	2	0	0	0	0	0	0	0	0	0	0	1	0	0	0	1	0	0	0	0	0	0	0	0	0	0	0	0	0	0	1	0	1	0	0	1	0	0	0	0	0	1	0	0	0	0	0	1
Campylobacter	361	0	0	0	0	0	0	0	0	0	0	0	0	0	0	0	0	0	0	0	0	0	0	1	0	0	0	0	0	0	0	0	0	0	0	0	1	0	0	0	0	0	0	0	0	0	0	0	0
Campylobacter	797	0	0	0	0	0	0	0	0	0	0	0	0	0	0	0	0	0	0	0	0	0	0	0	0	0	0	0	0	0	0	0	0	0	0	0	0	0	2	0	0	0	0	0	0	0	0	0	0
Campylobacter	1631	0	0	0	0	0	0	0	0	0	0	0	0	0	0	0	0	0	0	0	0	0	0	1	0	0	0	0	0	0	0	0	0	0	0	0	0	0	0	0	0	0	0	0	0	0	0	0	0
Campylobacter	308	0	0	0	0	0	0	0	0	0	0	0	0	0	0	0	0	0	0	0	0	0	0	0	0	0	0	0	0	0	0	0	0	0	0	0	0	1	0	0	0	0	0	0	0	0	0	0	0
Campylobacter	1427	0	0	0	0	0	0	0	0	0	0	0	0	0	0	0	0	0	0	0	0	0	0	0	0	0	0	0	0	0	0	0	0	0	0	0	1	0	0	0	0	0	0	0	0	0	0	0	0
Campylobacter	1761	0	0	0	0	0	0	0	0	0	0	0	0	0	0	0	0	0	0	0	0	0	0	0	1	0	0	0	0	0	0	0	0	0	0	0	0	0	0	0	0	0	0	0	0	0	0	0	0
Campylobacter	2200	0	0	0	0	0	0	0	0	0	0	0	0	0	0	0	0	0	0	0	0	0	0	0	0	0	0	0	0	0	0	0	0	0	0	0	0	1	0	0	0	0	0	0	0	0	0	0	0
Campylobacter	2328	0	0	0	0	0	0	0	0	0	0	0	0	0	0	0	0	0	0	0	0	0	0	0	0	0	1	0	0	0	0	0	0	0	0	0	0	0	0	0	0	0	0	0	0	0	0	0	0
Campylobacterales	1778	0	0	0	0	0	0	0	0	0	0	0	0	0	0	0	0	0	0	0	0	0	0	2	0	0	0	0	0	0	0	0	0	0	0	0	0	0	0	0	0	0	0	0	0	0	0	0	0
Campylobacterales	234	0	0	0	0	0	0	0	0	0	0	0	0	0	0	0	0	0	0	0	0	0	0	0	0	0	0	0	0	0	0	0	0	0	0	0	0	0	0	0	0	0	0	0	0	0	0	0	0
Campylobacterales	237	1	0	0	0	0	0	0	0	0	0	0	0	0	0	0	0	0	0	0	0	0	0	0	0	0	0	0	0	0	0	0	0	0	0	0	0	0	0	0	0	0	0	0	0	0	0	0	0
Campylobacterales	271	0	0	0	0	0	0	0	0	0	0	0	0	0	0	0	0	0	0	0	0	0	0	0	0	0	0	0	0	0	0	0	0	0	0	0	0	0	0	0	0	0	0	0	0	0	0	0	0
Campylobacterales	390	0	0	0	0	0	0	0	0	0	0	0	0	0	0	0	0	0	0	0	0	0	0	1	0	0	0	0	0	0	0	0	0	0	0	0	0	0	0	0	0	0	0	0	0	0	0	0	0
Campylobacterales	1317	0	0	0	0	0	0	0	0	0	0	0	0	0	0	0	0	0	0	0	0	0	0	0	0	0	0	0	0	0	0	0	0	0	0	0	0	0	0	0	0	0	0	0	0	0	0	0	0
Aeromonas	650	0	0	0	0	0	0	0	0	0	0	0	0	0	0	0	0	0	0	0	0	0	0	0	0	0	0	0	0	0	0	0	0	1	0	0	0	0	0	0	0	0	0	0	0	0	0	0	0
Microbulbifer	2036	0	0	0	0	0	0	0	0	0	0	0	0	0	1	0	0	0	0	0	0	0	0	0	0	0	0	0	0	0	0	0	0	0	0	0	0	0	0	0	0	0	0	0	0	0	0	0	0
Pantoea	45	0	0	0	0	0	0	0	0	0	0	0	0	0	0	0	0	0	0	0	0	0	0	0	0	0	0	0	0	0	0	0	0	0	0	0	0	0	1	0	0	0	0	0	0	0	0	0	0
Enterobacteriaceae	1212	0	0	0	1	0	0	0	0	0	0	0	1	0	0	0	0	0	0	0	0	0	0	0	0	0	0	0	0	0	0	0	0	0	0	0	0	0	0	0	0	0	0	0	0	0	0	0	0
Enterobacteriaceae	162	0	0	0	0	0	0	0	0	0	0	0	0	0	0	0	0	0	0	0	0	0	0	0	0	0	0	0	0	0	0	0	0	0	0	0	0	0	0	0	0	0	0	0	0	0	0	0	0
Alcanivorax	1983	0	0	0	0	0	0	0	0	0	0	0	0	0	0	0	0	0	0	0	0	0	0	0	0	0	0	0	0	0	0	0	0	0	0	0	0	0	0	0	0	0	0	0	0	0	0	0	0
Halomonadaceae	1524	0	0	0	0	0	0	0	0	0	0	1	0	0	0	0	0	0	0	0	0	0	0	0	0	0	0	0	0	0	0	0	0	0	0	0	0	0	0	0	0	0	0	0	0	0	0	0	0
Marinomonas	598	0	0	0	0	0	0	0	0	0	0	0	0	0	0	0	0	0	0	0	0	0	0	0	0	0	0	0	0	0	0	0	0	0	0	0	0	0	4	0	0	0	0	0	0	0	0	0	0
Actinobacillus	340	0	0	0	0	0	0	0	0	0	0	0	0	0	0	0	0	0	0	0	0	0	0	0	0	0	0	0	0	0	0	0	0	0	0	0	0	0	1	0	0	0	0	0	0	0	0	0	0
Actinobacillus	2042	0	0	0	0	0	0	0	0	0	0	0	0	0	0	0	0	0	0	0	0	0	0	0	0	0	0	0	0	0	0	0	0	0	0	0	0	0	0	0	0	0	0	1	0	0	0	0	0
Pasteurellaceae	151	0	0	0	0	0	0	0	0	0	0	0	0	0	0	0	0	0	0	0	0	0	0	0	0	0	0	0	0	0	0	0	0	0	0	0	0	0	0	0	0	0	0	2	0	0	0	0	0
Pasteurellaceae	614	0	1	0	0	0	0	0	0	0	0	0	0	0	0	0	0	0	0	0	0	0	0	0	0	0	0	0	0	0	1	0	0	1	0	0	0	0	6	0	0	0	0	2	0	0	0	0	0
Pasteurellaceae	826	0	0	0	0	0	0	0	0	0	0	0	0	0	0	0	0	0	0	0	0	0	0	0	0	0	0	0	0	0	0	0	0	0	0	0	0	0	0	0	0	0	0	0	0	0	0	0	0
Pasteurellaceae	1370	0	0	0	0	0	0	0	0	0	0	0	0	0	0	0	0	0	0	0	0	0	0	0	0	0	0	0	0	0	0	0	0	0	0	0	0	0	0	0	0	0	0	0	0	0	0	0	0
Pasteurellaceae	1470	0	0	0	0	0	0	0	0	0	0	0	0	0	0	0	0	0	0	0	0	0	0	0	0	0	0	0	0	0	0	0	0	0	0	0	0	0	1	0	0	0	0	0	0	0	0	0	0
Pasteurellaceae	2093	0	0	0	0	0	0	0	0	0	0	0	0	0	0	0	0	0	0	0	0	0	0	0	0	0	0	0	0	0	0	0	0	0	0	0	0	0	1	0	0	0	0	0	0	0	0	0	0
Enhydrobacter	1088	0	0	0	0	0	0	0	0	0	0	0	0	0	0	0	0	0	0	0	0	0	0	0	0	0	0	0	0	0	0	0	0	0	0	0	0	0	29	1	0	0	1	0	1	0	0	0	0
Acinetobacter	1304	0	0	1	0	0	1	0	4	1	0	127	7	1	0	0	0	0	0	0	0	0	0	0	0	0	0	0	1	0	0	0	0	0	0	0	0	0	4	1	0	0	0	4	0	0	0	2	0
Acinetobacter	628	0	0	0	0	0	0	0	0	0	0	4	0	0	0	0	0	0	0	0	0	0	0	0	0	0	0	0	0	0	0	0	0	0	0	0	0	0	0	0	0	0	0	0	0	0	0	0	0
Acinetobacter	1452	0	0	0	0	0	3	0	0	0	0	0	0	0	0	0	0	0	0	0	0	0	0	0	0	0	0	0	0	0	0	0	0	1	0	0	0	0	0	0	0	0	0	0	0	0	0	0	0
Acinetobacter	2077	0	0	0	0	0	0	0	0	0	0	0	0	0	0	0	0	0	0	0	0	0	0	0	0	0	0	0	0	0	0	0	0	0	0	0	0	0	0	0	0	0	0	1	0	0	0	0	2
Acinetobacter	1616	0	0	0	0	0	0	0	0	0	0	0	0	0	0	0	0	0	0	0	0	0	0	0	0	0	0	0	0	0	0	0	0	0	0	0	0	0	0	0	0	0	0	0	0	0	0	1	0
Acinetobacter	60	0	0	0	0	0	0	0	0	0	0	1	0	0	0	0	0	0	0	0	0	0	0	0	0	0	0	0	0	0	0	0	0	0	0	0	0	0	0	0	0	0	0	0	0	0	0	0	0
Acinetobacter	155	0	0	0	0	0	0	0	0	0	0	0	0	0	0	0	0	0	0	0	0	0	0	0	0	0	0	0	0	0	0	0	0	0	0	0	0	0	0	0	0	0	0	0	0	0	0	0	0
Acinetobacter	1243	0	0	0	0	0	0	0	0	0	0	0	0	0	0	0	0	0	0	0	0	0	0	0	0	0	0	0	0	0	0	0	0	0	0	0	0	0	0	0	0	0	0	0	0	0	0	0	0
Acinetobacter	1268	0	0	0	0	0	0	0	0	0	0	1	0	0	0	0	0	0	0	0	0	0	0	0	0	0	0	0	0	0	0	0	0	0	0	0	0	0	0	0	0	0	0	0	0	0	0	0	0
Acinetobacter	1438	0	0	0	0	0	0	0	0	0	0	0	0	0	0	0	0	0	0	0	0	0	0	0	0	0	0	0	0	0	0	0	0	0	0	0	0	0	0	0	0	0	0	0	0	0	0	0	0
Acinetobacter	1990	0	0	0	0	0	0	0	0	0	0	0	0	0	0	0	0	0	0	0	0	0	0	0	0	0	0	0	0	0	0	0	0	0	0	0	0	0	0	0	0	0	0	0	0	0	0	0	0
Branhamella	1008	0	0	0	0	1	11	0	1	16	0	26	0	0	1	0	1	0	0	0	0	0	32	0	0	0	0	0	0	0	2	0	2	0	2	0	0	0	0	0	0	0	0	0	0	0	0	0	8
Branhamella	17	0	0	0	0	0	0	0	0	0	0	0	0	0	0	0	0	0	0	0	0	0	2	0	0	0	0	0	0	0	0	0	0	0	0	0	0	0	0	0	0	0	0	0	0	0	0	0	0
Branhamella	1693	0	0	0	0	0	0	0	0	0	0	0	0	0	0	0	0	0	0	0	0	0	1	0	0	0	0	0	0	0	0	0	0	0	0	0	0	0	0	0	0	0	0	0	0	0	0	0	0
Moraxella	515	0	0	0	0	0	0	0	0	0	0	0	0	0	0	0	0	0	0	0	0	0	0	0	0	0	0	0	0	0	0	0	0	0	0	0	0	0	0	0	0	0	0	0	0	0	0	0	0
Moraxellaceae	1849	0	0	0	0	0	0	0	0	0	0	3	0	0	0	0	0	0	0	0	0	0	0	0	0	0	0	0	0	0	0	0	0	0	0	0	0	0	0	0	0	0	0	0	0	0	0	0	0
Moraxellaceae	1994	0	0	0	0	0	0	0	0	0	0	0	0	0	0	0	0	0	0	0	0	0	1	0	0	0	0	0	0	0	0	0	0	0	0	0	0	0	0	0	0	0	0	0	0	0	0	0	0
Moraxellaceae	2051	0	0	0	0	0	1	0	0	0	0	0	0	0	0	0	0	0	0	0	0	0	0	0	0	0	0	0	0	0	0	0	0	0	0	0	0	0	0	0	0	0	0	0	0	0	0	0	0
Cellvibrio	2061	0	0	0	0	0	0	0	0	0	0	0	0	0	1	0	0	0	0	0	0	0	0	0	0	0	0	0	0	0	0	0	0	0	0	0	0	0	0	0	0	0	0	0	0	0	0	0	0
Pseudomonas	2296	0	0	0	0	0	2	0	0	0	0	10	0	1	1	0	0	0	0	0	0	0	0	0	0	0	0	0	0	0	0	0	0	0	0	1	0	0	0	0	0	0	0	3	0	0	0	0	0
Pseudomonas	1126	0	0	0	0	0	1	0	0	0	1	0	0	0	0	0	0	0	0	0	0	0	0	0	0	0	0	0	0	0	0	0	0	0	0	0	0	0	0	0	0	0	0	1	0	0	0	0	0
Pseudomonadaceae	2101	0	0	0	0	0	0	0	0	0	0	0	1	0	0	0	0	0	0	0	0	0	0	0	0	0	0	0	0	0	0	0	0	0	0	0	0	0	0	0	0	0	0	0	0	0	0	0	0
Pseudomonadaceae	1755	0	0	0	0	0	0	0	0	0	0	1	0	0	0	0	0	0	0	0	0	0	0	0	0	0	0	0	0	0	0	0	0	0	0	0	0	0	0	0	0	0	0	0	0	0	0	0	0
Pseudomonadaceae	582	0	0	0	0	0	0	0	0	0	0	0	0	0	0	0	0	0	0	0	0	0	0	0	0	0	0	0	0	0	0	0	0	0	0	0	0	0	0	0	0	0	0	0	0	0	0	0	0
Nevskia	1339	0	0	0	0	0	0	0	0	0	0	0	0	0	0	0	0	0	1	0	0	0	0	0	0	0	0	0	0	0	0	0	0	0	0	0	0	0	0	0	0	0	0	0	0	0	0	0	0
Nevskia	1974	0	0	0	0	0	0	0	0	0	0	0	0	0	0	0	0	0	0	0	0	0	0	0	0	0	0	0	0	0	0	0	0	0	0	0	0	0	0	0	0	0	0	0	0	0	0	0	0
Pseudoxanthomonas	1575	0	0	0	0	0	0	0	0	0	0	2	0	0	0	0	0	0	0	0	0	0	0	0	0	0	0	0	0	0	0	0	0	0	0	0	0	0	0	0	0	0	0	0	0	0	0	0	0
Pseudoxanthomonas	1638	0	0	0	0	0	0	0	0	0	0	0	0	0	0	0	0	0	0	0	0	0	0	0	0	0	0	0	0	0	0	0	0	0	0	0	0	0	0	1	0	0	0	0	0	0	0	0	0
Stenotrophomonas	2069	0	0	0	0	0	0	0	0	0	0	3	0	0	0	0	0	0	0	0	0	0	0	0	0	0	0	0	0	0	0	0	0	0	0	0	0	0	0	0	0	0	0	0	0	0	0	0	0
Stenotrophomonas	914	0	0	0	0	0	0	0	0	0	0	1	0	0	0	0	0	0	0	0	0	0	0	0	0	0	0	0	0	0	0	0	0	0	0	0	0	0	0	0	0	0	0	0	0	0	0	0	0
Stenotrophomonas	2157	0	0	0	0	0	0	0	0	0	0	1	0	0	0	0	0	0	0	0	0	0	0	0	0	0	0	0	0	0	0	0	0	0	0	0	0	0	0	0	0	0	0	0	0	0	0	0	0
Xanthomonadaceae	1984	0	0	0	0	0	0	0	0	0	0	5	0	0	0	0	0	0	0	0	0	0	0	0	0	0	0	0	0	0	0	0	0	0	0	0	0	0	0	0	0	0	0	0	0	0	0	0	0
Xanthomonadaceae	1456	0	0	0	0	0	0	0	0	0	0	1	0	0	0	0	0	0	0	0	0	0	0	0	0	0	0	0	0	0	0	0	0	0	0	0	0	0	0	0	0	0	0	2	0	0	0	0	0
Xanthomonadaceae	517	0	0	0	0	0	0	0	0	0	0	0	0	0	0	0	0	0	0	0	0	0	0	0	0	0	0	0	0	0	0	0	0	0	0	0	0	0	0	0	0	0	0	0	0	0	0	0	0
Xanthomonadaceae	2244	0	0	0	0	0	0	0	0	0	0	0	0	0	0	0	0	0	0	0	0	0	0	0	0	0	0	0	0	0	0	0	0	0	0	0	0	0	0	0	0	0	0	0	0	0	0	0	0
Xanthomonadaceae	583	0	0	0	0	0	0	0	0	0	0	0	0	0	0	0	0	0	0	0	0	0	0	0	0	0	0	1	0	0	0	0	0	0	0	0	0	0	0	0	0	0	0	0	0	0	0	0	0
Gammaproteobacteria	2306	0	0	0	0	0	0	0	0	0	0	0	1	0	0	0	0	0	1	0	0	0	0	0	0	0	0	0	0	0	0	0	0	0	0	0	0	0	0	0	0	0	0	0	0	0	0	0	0
Gammaproteobacteria	885	0	0	0	0	0	0	0	0	0	0	2	0	0	0	0	0	0	0	0	0	0	0	0	0	0	0	0	0	0	0	0	0	0	0	0	0	0	0	0	0	0	0	0	0	0	0	0	0
Gammaproteobacteria	2094	0	0	0	0	0	0	0	0	0	0	0	2	0	0	0	0	0	0	0	0	0	0	0	0	0	0	0	0	0	0	0	0	0	0	0	0	0	0	0	0	0	0	0	0	0	0	0	0
Gammaproteobacteria	360	0	0	0	0	0	0	0	0	0	0	0	0	0	0	0	0	0	0	0	0	0	0	0	0	0	0	0	0	0	0	0	0	0	0	0	0	0	0	0	0	0	0	0	0	0	0	0	0
Gammaproteobacteria	740	0	0	0	0	0	0	0	0	0	0	0	0	0	0	0	0	0	0	0	0	0	0	0	0	0	0	0	0	0	0	0	0	0	0	0	0	0	0	0	0	0	0	0	0	0	0	0	1
Gammaproteobacteria	1837	0	0	0	0	0	0	0	0	0	0	0	0	0	0	0	0	0	0	0	0	0	0	0	0	0	0	0	0	0	0	0	0	0	0	0	0	0	0	0	0	0	0	0	0	0	0	0	0
Proteobacteria	145	0	0	0	0	0	0	0	0	1	1	0	1	3	0	0	0	0	0	0	0	0	0	0	0	0	0	0	0	0	0	0	0	0	0	0	0	0	0	0	0	0	0	0	0	0	0	0	0
Proteobacteria	5	0	0	0	0	0	0	0	0	1	0	0	0	0	0	0	0	0	0	0	0	0	0	0	0	0	0	0	0	0	0	0	0	0	0	0	0	0	0	0	0	0	0	0	0	0	0	0	0
Proteobacteria	2048	0	0	0	0	0	0	0	0	1	0	0	0	1	0	0	0	0	0	0	0	0	0	0	0	0	0	0	0	0	0	0	0	0	0	0	0	0	0	0	0	0	0	0	0	0	0	0	0
Treponema	1352	0	0	0	0	0	0	0	0	0	0	0	0	0	0	0	0	0	0	0	0	0	0	0	0	0	0	0	0	0	0	0	0	0	0	0	0	0	0	0	0	0	0	0	0	0	0	0	0
unidentified	1596	0	0	0	0	0	1	0	0	0	0	0	0	0	0	0	0	0	0	0	0	0	0	0	0	0	0	0	0	0	0	0	0	0	0	0	0	0	0	0	0	0	0	0	0	0	0	0	0
unidentified	63	40	37	0	0	12	5	22	7	0	16	9	4	24	37	0	4	0	0	1	7	4	0	0	11	41	3	7	4	2	24	0	45	7	33	1	37	3	0	4	3	3	14	0	4	0	0	2	17
unidentified	1518	0	0	0	1	0	0	0	24	0	1	0	0	7	12	0	31	0	0	0	54	81	0	0	1	18	54	45	46	0	3	0	21	0	4	0	0	0	0	0	0	0	6	0	0	0	0	0	0
unidentified	343	0	2	0	0	0	0	9	14	0	4	6	3	21	27	0	0	0	0	0	34	28	0	0	1	30	29	30	40	1	2	0	23	0	9	0	13	2	3	6	25	4	5	0	1	0	0	6	9
unidentified	300	0	0	0	0	2	1	0	9	0	1	0	1	0	0	0	10	0	0	0	19	17	0	0	8	0	15	14	14	0	0	0	0	0	0	0	16	1	0	0	0	0	1	0	1	0	0	0	12
unidentified	1079	0	0	0	0	0	0	0	0	0	0	0	4	16	20	0	0	0	0	0	0	0	0	0	0	26	0	0	0	0	0	0	20	0	6	0	5	0	0	0	0	0	1	0	0	0	0	0	5
unidentified	81	6	3	0	0	2	3	13	6	0	0	0	0	0	0	0	19	0	0	0	0	0	0	0	4	0	1	0	0	0	0	0	0	0	1	0	7	0	0	0	0	0	0	0	0	0	0	0	1
unidentified	415	9	2	0	0	0	0	0	0	0	2	0	0	0	0	0	0	0	0	0	2	3	0	0	0	0	3	0	1	0	0	0	0	6	0	0	0	1	0	5	19	2	2	0	0	0	0	4	1
unidentified	1636	1	0	0	1	0	0	0	4	0	1	2	0	0	0	0	0	0	0	0	12	7	0	0	0	0	4	1	10	0	0	0	0	1	0	0	3	0	0	0	0	0	0	0	0	0	0	0	0
unidentified	549	0	0	0	0	0	0	0	2	3	5	0	11	4	3	0	0	0	0	0	1	0	0	0	0	0	0	0	0	0	0	0	0	0	0	0	0	0	0	0	0	0	0	0	0	0	0	0	0
unidentified	1328	0	0	0	0	0	0	0	0	0	0	0	0	0	0	0	0	0	0	0	0	0	0	0	0	0	0	0	0	0	0	0	0	0	0	0	17	1	0	0	0	0	1	0	0	0	0	0	4
unidentified	677	0	0	0	0	0	0	0	0	0	0	0	0	0	0	0	13	0	0	0	1	0	0	0	0	1	0	1	0	0	1	0	0	0	1	0	0	0	0	0	0	0	0	0	0	0	0	0	0
unidentified	2190	0	0	0	0	0	0	0	1	0	0	0	0	0	0	0	6	0	0	0	1	4	0	0	0	0	3	2	0	0	0	0	0	0	0	0	0	0	0	0	0	0	0	0	0	0	0	0	0
unidentified	255	0	1	0	0	0	0	0	0	0	4	0	0	0	0	0	0	0	0	0	0	1	0	0	0	0	0	2	1	0	0	0	0	1	0	0	0	0	0	0	4	0	0	0	0	0	0	0	0
unidentified	1744	0	0	0	0	0	0	0	0	0	0	0	0	0	0	0	0	0	0	0	3	3	0	0	0	0	4	3	2	0	0	0	0	0	0	0	0	0	0	0	0	0	0	0	0	0	0	0	0
unidentified	1323	0	0	0	1	0	0	0	0	0	1	0	0	0	0	0	1	0	0	0	2	1	0	0	0	0	3	3	1	0	0	0	0	0	0	0	0	0	0	0	0	0	0	0	0	0	0	0	0
unidentified	688	0	0	0	0	0	0	0	0	0	0	0	0	0	0	0	5	0	0	0	0	0	0	0	0	0	1	0	0	0	0	0	0	0	1	0	0	0	0	0	0	0	1	0	0	0	0	0	0
unidentified	1028	0	0	0	0	0	0	0	0	0	0	0	0	0	0	0	0	0	0	0	0	0	0	0	0	0	0	0	0	0	0	0	0	0	0	0	0	0	0	0	0	0	0	0	0	0	0	0	0
unidentified	1867	0	0	0	0	0	1	0	2	0	0	0	0	0	0	0	0	0	0	0	1	0	0	0	0	0	0	0	2	0	0	0	0	0	0	0	0	0	0	0	0	0	0	0	0	0	0	0	0
unidentified	2337	0	0	0	0	0	0	1	0	0	0	0	0	0	1	0	0	0	0	0	0	0	0	0	0	0	0	0	0	0	0	0	1	0	0	0	0	0	0	0	0	0	0	0	0	0	0	1	0
unidentified	835	0	0	0	0	0	0	0	0	0	0	0	0	0	0	0	2	0	0	0	0	0	0	0	0	0	0	0	0	0	0	0	0	0	1	0	0	0	0	0	0	0	1	0	0	0	0	0	0
unidentified	921	0	0	0	0	0	0	0	0	0	0	0	0	2	0	0	0	0	0	0	0	0	0	0	0	1	0	0	0	0	0	0	1	0	0	0	0	0	0	0	0	0	0	0	0	0	0	0	0
unidentified	926	0	0	0	0	0	0	0	0	0	0	0	0	0	1	0	0	0	0	0	0	0	0	0	1	3	0	0	0	0	0	0	0	0	0	0	0	0	0	0	0	0	1	0	0	0	0	0	0
unidentified	1593	0	0	0	0	0	0	0	0	0	0	0	0	0	0	0	0	0	0	0	0	1	0	0	0	0	0	2	2	0	0	0	0	0	0	0	0	0	0	0	0	0	0	0	0	0	0	0	0
unidentified	1765	0	0	0	0	0	0	0	0	0	0	0	0	0	1	0	0	0	0	0	1	2	0	0	0	0	0	0	0	0	0	0	1	0	1	0	0	0	0	0	0	0	0	0	0	0	0	0	0
unidentified	183	0	0	0	0	1	0	0	0	0	1	0	0	2	0	0	0	0	0	0	0	0	0	0	0	0	1	0	0	0	0	0	0	0	0	0	0	0	0	0	0	0	0	0	0	0	0	0	0
unidentified	481	0	0	0	0	0	0	0	0	0	0	0	0	0	0	0	0	1	0	0	0	0	0	1	0	0	0	0	0	0	0	0	0	0	0	0	0	0	0	0	0	0	0	0	0	0	0	0	0
unidentified	659	0	0	0	0	0	0	0	1	0	0	0	0	0	0	0	0	0	0	0	0	0	0	0	0	1	0	0	0	0	0	0	0	0	0	0	0	0	0	0	0	0	0	0	1	0	0	0	1
unidentified	1612	0	0	0	0	0	0	0	0	0	0	0	0	0	0	0	0	0	0	0	0	0	0	0	0	1	1	0	0	0	0	0	1	0	0	0	1	0	0	0	0	0	0	0	0	0	0	0	0
unidentified	1635	0	0	0	0	0	0	0	0	0	0	0	0	0	0	0	2	0	0	0	0	1	0	0	0	0	0	1	1	0	0	0	0	0	0	0	0	0	0	0	0	0	0	0	0	0	0	0	0
unidentified	2128	0	0	0	0	0	0	0	0	0	0	0	0	0	0	0	0	0	0	0	0	0	0	0	1	0	0	0	0	0	0	0	0	0	0	0	2	0	0	0	0	0	0	0	0	0	0	0	0
unidentified	2145	0	0	0	0	0	0	0	0	0	0	0	0	0	0	0	0	0	2	0	0	0	0	0	0	0	0	0	0	0	0	0	0	0	0	0	0	0	0	1	0	0	0	0	0	0	0	0	0
unidentified	240	0	0	0	0	0	0	0	0	0	0	0	0	0	0	0	0	0	0	0	0	0	0	0	0	0	2	1	0	0	0	0	0	0	0	0	0	0	0	0	0	0	0	0	0	0	0	0	0
unidentified	244	0	0	0	0	0	0	0	0	0	0	0	0	0	0	0	0	0	0	0	0	0	0	0	0	1	0	0	0	0	0	0	0	0	0	0	0	0	0	0	0	0	0	0	0	0	0	0	0
unidentified	466	0	0	0	0	0	0	0	0	0	0	0	0	0	0	0	0	0	0	0	0	2	0	0	0	0	0	0	0	0	0	0	1	0	0	0	0	0	0	0	0	0	0	0	0	0	0	0	0
unidentified	1238	0	0	0	0	0	0	0	0	0	1	0	2	1	0	0	0	0	0	0	0	0	0	0	0	0	0	0	0	0	0	0	0	0	0	0	0	0	0	0	0	0	0	0	0	0	0	0	0
unidentified	1793	0	0	0	0	0	0	0	0	0	0	0	0	0	0	0	0	0	0	0	0	0	0	0	0	0	0	0	0	0	0	0	0	0	0	0	0	0	1	0	0	0	0	0	0	0	0	0	0
unidentified	2049	0	0	0	0	0	0	0	0	0	0	0	0	0	0	0	1	0	0	0	0	2	0	0	0	0	0	0	1	0	0	0	0	0	0	0	0	0	0	0	0	0	0	0	0	0	0	0	0
unidentified	73	0	0	0	0	0	0	0	0	0	0	0	0	1	0	0	0	0	0	0	0	0	0	0	0	1	0	0	0	0	0	0	0	0	0	0	0	0	0	0	0	0	0	0	0	0	0	0	0
unidentified	269	0	0	0	0	0	0	0	1	0	0	0	0	0	0	0	0	0	0	0	0	0	0	0	0	0	0	0	1	0	0	0	0	0	1	0	0	0	0	0	0	0	0	0	0	0	0	0	0
unidentified	457	0	0	0	0	0	0	0	0	0	0	0	0	0	0	0	0	0	0	0	0	1	0	0	0	2	0	0	0	0	0	0	0	0	0	0	0	0	0	0	0	0	0	0	0	0	0	0	0
unidentified	824	0	0	0	0	0	0	0	0	0	0	0	0	0	0	0	0	0	0	0	0	0	0	0	0	0	0	0	0	0	0	0	0	0	0	0	0	0	0	0	0	0	0	0	0	0	0	0	0
unidentified	861	0	0	0	0	0	0	0	0	0	0	0	0	0	0	0	0	0	0	3	0	0	0	0	0	0	0	0	0	0	0	0	0	0	0	0	0	0	0	0	0	0	0	0	0	0	0	0	0
unidentified	1163	0	0	0	0	0	0	0	0	0	0	0	0	0	0	0	0	0	0	1	0	0	0	0	0	0	0	0	0	0	0	0	0	0	0	0	0	0	0	0	0	0	0	0	0	0	0	0	0
unidentified	1240	0	0	0	0	0	0	0	0	0	0	0	0	0	0	0	0	0	0	0	0	1	0	0	0	2	0	0	0	0	0	0	0	0	0	0	0	0	0	0	0	0	0	0	0	0	0	0	0
unidentified	1367	0	0	0	0	0	0	0	0	0	0	0	0	0	0	0	0	0	0	0	1	1	0	0	0	0	1	0	0	0	0	0	0	0	0	0	0	0	0	0	0	0	0	0	0	0	0	0	0
unidentified	1784	1	0	0	0	0	0	0	0	0	0	0	0	0	0	0	0	0	0	0	0	0	0	0	0	0	0	0	1	0	0	0	0	0	0	0	0	0	0	0	1	0	0	0	0	0	0	0	0
unidentified	1954	0	0	0	0	0	0	0	0	0	0	0	0	0	0	0	0	0	0	0	1	0	0	0	0	2	0	0	0	0	0	0	0	0	0	0	0	0	0	0	0	0	0	0	0	0	0	0	0
unidentified	2275	0	0	0	0	0	0	0	0	0	0	0	0	0	0	0	0	0	0	0	0	0	0	0	0	0	0	0	0	0	0	0	0	0	0	0	1	0	0	0	0	0	0	0	0	0	0	0	2
unidentified	142	0	0	0	0	0	0	0	0	0	0	0	0	0	0	0	0	0	0	0	0	1	0	0	0	0	0	1	0	0	0	0	0	0	0	0	0	0	0	0	0	0	0	0	0	0	0	0	0
unidentified	293	0	0	0	0	0	0	0	0	0	0	0	0	0	1	0	0	0	0	0	0	0	0	0	0	1	0	0	0	0	0	0	0	0	0	0	0	0	0	0	0	0	0	0	0	0	0	0	0
unidentified	329	0	0	0	0	0	0	0	0	0	0	0	0	0	0	0	0	0	0	0	0	0	0	0	0	1	0	0	1	0	0	0	0	0	0	0	0	0	0	0	0	0	0	0	0	0	0	0	0
unidentified	426	0	0	0	0	0	0	0	0	0	0	2	0	0	0	0	0	0	0	0	0	0	0	0	0	0	0	0	0	0	0	0	0	0	0	0	0	0	0	0	0	0	0	0	0	0	0	0	0
unidentified	544	0	0	0	0	0	0	0	0	0	0	0	0	0	0	0	0	0	0	0	0	0	0	0	0	0	0	0	0	2	0	0	0	0	0	0	0	0	0	0	0	0	0	0	0	0	0	0	0
unidentified	579	0	0	0	0	0	0	1	0	0	0	0	0	0	0	0	0	0	0	0	0	1	0	0	0	0	0	0	0	0	0	0	0	0	0	0	0	0	0	0	0	0	0	0	0	0	0	0	0
unidentified	595	0	0	0	0	0	0	0	0	0	0	0	0	0	0	0	0	0	0	0	0	1	0	0	0	0	0	0	0	0	0	0	0	0	0	0	1	0	0	0	0	0	0	0	0	0	0	0	0
unidentified	778	0	0	0	0	0	0	0	0	0	0	0	0	0	0	0	0	0	0	0	0	0	0	0	0	0	0	0	0	0	0	0	0	0	0	0	0	0	0	0	0	0	0	0	0	0	0	0	0
unidentified	947	0	0	0	0	0	0	0	0	0	0	0	0	0	0	0	0	0	0	0	0	0	0	0	0	0	0	0	0	0	0	0	0	0	0	0	0	0	0	0	0	0	0	0	0	0	0	0	0
unidentified	962	0	0	0	0	0	0	0	0	0	0	0	0	0	0	0	0	0	0	0	0	0	0	0	0	0	0	0	0	0	0	0	0	0	1	0	0	0	0	0	0	0	0	0	0	0	0	0	0
unidentified	985	0	0	0	0	0	0	0	0	0	0	0	0	0	0	0	0	0	0	0	0	0	0	0	0	0	0	0	0	0	1	0	0	0	0	0	0	0	0	0	0	0	0	0	0	0	0	0	0
unidentified	1035	0	0	0	0	0	0	0	0	0	0	0	0	0	0	0	0	0	0	0	0	0	0	0	0	0	0	0	0	0	0	0	0	0	0	0	0	0	0	0	0	0	0	0	0	0	0	0	0
unidentified	1110	1	0	0	0	0	0	0	0	0	0	0	0	0	0	0	0	0	0	0	0	0	0	0	0	0	0	0	0	0	0	0	0	1	0	0	0	0	0	0	0	0	0	0	0	0	0	0	0
unidentified	1422	0	0	0	0	0	0	0	0	0	0	2	0	0	0	0	0	0	0	0	0	0	0	0	0	0	0	0	0	0	0	0	0	0	0	0	0	0	0	0	0	0	0	0	0	0	0	0	0
unidentified	1463	0	0	0	0	0	0	0	0	0	0	0	0	0	0	0	0	0	0	0	0	0	0	0	0	2	0	0	0	0	0	0	0	0	0	0	0	0	0	0	0	0	0	0	0	0	0	0	0
unidentified	1484	0	0	0	0	0	0	0	0	0	0	0	0	0	0	1	0	0	0	0	0	0	0	0	0	0	0	0	0	0	0	0	0	0	0	0	0	0	0	0	0	0	0	0	0	0	0	0	0
unidentified	1561	0	0	0	0	0	0	0	0	0	0	0	0	0	1	0	0	0	0	0	0	0	0	0	0	1	0	0	0	0	0	0	0	0	0	0	0	0	0	0	0	0	0	0	0	0	0	0	0
unidentified	1583	0	0	0	0	0	0	0	0	0	0	0	0	0	0	0	0	0	0	0	0	0	0	0	2	0	0	0	0	0	0	0	0	0	0	0	0	0	0	0	0	0	0	0	0	0	0	0	0
unidentified	1749	0	0	0	0	0	0	0	0	0	0	0	0	0	0	0	0	0	0	0	0	0	0	0	0	2	0	0	0	0	0	0	0	0	0	0	0	0	0	0	0	0	0	0	0	0	0	0	0
unidentified	1893	0	0	0	0	0	0	0	0	0	0	0	0	0	0	0	0	0	0	0	0	0	0	0	0	0	0	0	0	0	0	0	0	0	0	0	1	0	0	0	0	0	0	0	0	0	0	0	0
unidentified	1997	0	0	0	0	0	0	0	0	0	0	0	0	0	0	0	0	0	0	0	1	0	0	0	0	0	0	0	0	0	0	0	0	0	0	0	0	0	0	0	1	0	0	0	0	0	0	0	0
unidentified	2003	0	0	0	0	0	0	0	0	0	0	0	0	0	0	0	0	0	0	0	0	0	0	0	0	0	0	0	0	0	0	0	0	0	0	0	0	0	0	0	0	0	0	0	0	0	0	0	0
unidentified	2085	0	0	0	0	0	0	0	0	0	0	0	0	0	0	0	1	0	0	0	0	0	0	0	0	0	0	0	0	0	0	0	0	0	0	0	0	0	0	0	0	0	0	0	0	0	0	0	1
unidentified	2089	0	0	0	0	0	0	0	0	0	0	0	0	0	0	0	0	0	0	0	0	0	0	0	0	0	1	0	0	0	0	0	0	0	0	0	1	0	0	0	0	0	0	0	0	0	0	0	0
unidentified	2125	0	0	0	0	0	0	0	0	0	0	0	0	0	0	0	0	0	0	0	0	0	0	0	0	0	0	0	1	0	0	0	0	0	0	0	0	0	0	0	1	0	0	0	0	0	0	0	0
unidentified	2204	0	0	0	0	0	0	0	0	0	0	0	0	0	0	0	0	2	0	0	0	0	0	0	0	0	0	0	0	0	0	0	0	0	0	0	0	0	0	0	0	0	0	0	0	0	0	0	0
unidentified	2208	0	0	0	0	0	0	0	0	0	0	0	0	0	0	0	0	0	0	0	0	0	0	0	0	0	2	0	0	0	0	0	0	0	0	0	0	0	0	0	0	0	0	0	0	0	0	0	0
unidentified	2252	0	0	0	0	0	0	0	0	0	0	0	0	0	0	0	0	0	0	0	0	0	0	0	0	2	0	0	0	0	0	0	0	0	0	0	0	0	0	0	0	0	0	0	0	0	0	0	0
unidentified	2318	0	0	0	0	0	0	0	0	0	0	0	0	0	0	0	0	0	0	0	1	0	0	0	0	1	0	0	0	0	0	0	0	0	0	0	0	0	0	0	0	0	0	0	0	0	0	0	0
unidentified	41	0	0	0	0	0	0	0	0	0	0	0	0	0	0	0	0	0	0	0	0	0	0	0	0	0	0	0	0	0	0	0	0	0	0	0	0	0	0	0	0	0	0	0	0	0	0	0	0
unidentified	49	0	0	0	0	0	0	0	0	0	0	0	0	0	0	0	0	0	0	0	0	1	0	0	0	0	0	0	0	0	0	0	0	0	0	0	0	0	0	0	0	0	0	0	0	0	0	0	0
unidentified	76	0	0	0	0	0	0	0	0	0	0	0	0	0	0	0	1	0	0	0	0	0	0	0	0	0	0	0	0	0	0	0	0	0	0	0	0	0	0	0	0	0	0	0	0	0	0	0	0
unidentified	86	0	0	0	0	0	0	0	0	0	0	0	0	0	0	0	0	0	0	0	1	0	0	0	0	0	0	0	0	0	0	0	0	0	0	0	0	0	0	0	0	0	0	0	0	0	0	0	0
unidentified	89	0	0	0	0	0	0	0	0	0	0	0	0	0	0	0	0	0	0	0	0	0	0	0	0	0	0	0	0	0	0	0	0	0	0	0	0	0	0	0	0	0	0	0	0	0	0	0	0
unidentified	99	0	0	0	0	0	0	0	0	0	0	0	0	0	1	0	0	0	0	0	0	0	0	0	0	0	0	0	0	0	0	0	0	0	0	0	0	0	0	0	0	0	0	0	0	0	0	0	0
unidentified	119	0	0	0	0	0	0	0	0	0	0	0	0	0	0	0	0	0	0	0	0	0	0	0	0	1	0	0	0	0	0	0	0	0	0	0	0	0	0	0	0	0	0	0	0	0	0	0	0
unidentified	132	0	0	0	0	0	0	0	0	0	0	0	0	0	0	0	0	0	0	0	0	0	0	0	0	0	0	0	0	0	0	0	0	0	0	0	1	0	0	0	0	0	0	0	0	0	0	0	0
unidentified	133	0	0	0	0	0	0	0	0	0	0	0	0	0	0	0	0	0	0	0	0	0	0	0	0	0	1	0	0	0	0	0	0	0	0	0	0	0	0	0	0	0	0	0	0	0	0	0	0
unidentified	144	0	1	0	0	0	0	0	0	0	0	0	0	0	0	0	0	0	0	0	0	0	0	0	0	0	0	0	0	0	0	0	0	0	0	0	0	0	0	0	0	0	0	0	0	0	0	0	0
unidentified	146	0	0	0	0	0	0	0	0	0	0	0	0	0	0	0	0	0	0	0	0	0	0	0	0	0	0	0	0	0	0	0	0	0	0	0	0	0	0	0	0	0	0	0	0	0	0	0	0
unidentified	170	0	0	0	0	0	0	0	0	0	0	0	0	0	0	0	0	0	0	0	0	1	0	0	0	0	0	0	0	0	0	0	0	0	0	0	0	0	0	0	0	0	0	0	0	0	0	0	0
unidentified	224	0	0	0	0	0	0	0	0	0	0	0	0	0	0	0	0	0	0	0	0	1	0	0	0	0	0	0	0	0	0	0	0	0	0	0	0	0	0	0	0	0	0	0	0	0	0	0	0
unidentified	229	0	0	0	0	0	0	0	0	0	0	0	0	0	0	0	0	0	0	0	0	0	0	0	1	0	0	0	0	0	0	0	0	0	0	0	0	0	0	0	0	0	0	0	0	0	0	0	0
unidentified	275	0	0	0	0	0	0	0	0	0	0	0	0	0	0	0	0	0	0	0	0	0	1	0	0	0	0	0	0	0	0	0	0	0	0	0	0	0	0	0	0	0	0	0	0	0	0	0	0
unidentified	281	0	0	0	0	0	0	0	0	0	0	0	0	0	0	0	0	0	0	0	0	0	0	0	0	0	0	0	0	0	0	0	0	0	0	0	1	0	0	0	0	0	0	0	0	0	0	0	0
unidentified	307	0	0	0	0	0	0	0	0	0	0	0	0	0	0	0	1	0	0	0	0	0	0	0	0	0	0	0	0	0	0	0	0	0	0	0	0	0	0	0	0	0	0	0	0	0	0	0	0
unidentified	309	0	0	0	0	0	0	0	0	0	0	0	0	0	0	0	0	0	0	0	0	0	0	0	0	0	0	0	0	0	0	0	0	0	0	0	0	0	0	0	0	0	0	0	0	0	0	0	0
unidentified	326	0	0	0	0	0	0	1	0	0	0	0	0	0	0	0	0	0	0	0	0	0	0	0	0	0	0	0	0	0	0	0	0	0	0	0	0	0	0	0	0	0	0	0	0	0	0	0	0
unidentified	350	0	0	0	0	0	0	0	0	0	0	0	0	0	0	0	0	0	0	0	0	0	0	0	0	0	0	0	0	0	0	0	0	0	0	0	0	0	0	0	0	0	0	0	0	0	0	0	0
unidentified	370	0	0	0	0	0	0	1	0	0	0	0	0	0	0	0	0	0	0	0	0	0	0	0	0	0	0	0	0	0	0	0	0	0	0	0	0	0	0	0	0	0	0	0	0	0	0	0	0
unidentified	393	0	0	0	0	0	0	0	0	0	0	0	0	0	0	0	0	0	0	0	0	1	0	0	0	0	0	0	0	0	0	0	0	0	0	0	0	0	0	0	0	0	0	0	0	0	0	0	0
unidentified	413	0	0	0	0	0	0	0	0	0	0	0	0	0	0	0	0	0	0	0	0	0	0	0	0	0	0	0	0	0	0	0	0	0	0	0	0	0	0	0	0	0	0	0	0	0	0	0	0
unidentified	416	1	0	0	0	0	0	0	0	0	0	0	0	0	0	0	0	0	0	0	0	0	0	0	0	0	0	0	0	0	0	0	0	0	0	0	0	0	0	0	0	0	0	0	0	0	0	0	0
unidentified	480	0	0	0	0	0	0	0	0	0	0	0	0	0	0	0	0	0	0	0	0	0	1	0	0	0	0	0	0	0	0	0	0	0	0	0	0	0	0	0	0	0	0	0	0	0	0	0	0
unidentified	486	0	0	0	0	0	0	0	0	0	0	0	0	0	0	0	0	0	0	0	0	1	0	0	0	0	0	0	0	0	0	0	0	0	0	0	0	0	0	0	0	0	0	0	0	0	0	0	0
unidentified	501	0	0	0	0	0	0	0	0	0	0	0	0	0	0	0	0	0	0	0	0	1	0	0	0	0	0	0	0	0	0	0	0	0	0	0	0	0	0	0	0	0	0	0	0	0	0	0	0
unidentified	508	0	0	0	0	0	0	0	0	0	0	0	0	0	0	0	0	0	0	0	0	0	0	0	0	0	0	0	0	0	0	0	0	0	0	0	0	0	0	0	0	0	0	0	0	0	0	0	0
unidentified	514	0	0	0	0	0	0	0	0	0	0	0	0	0	0	0	0	0	0	0	0	1	0	0	0	0	0	0	0	0	0	0	0	0	0	0	0	0	0	0	0	0	0	0	0	0	0	0	0
unidentified	532	0	0	0	0	0	0	0	0	0	0	0	0	0	0	0	1	0	0	0	0	0	0	0	0	0	0	0	0	0	0	0	0	0	0	0	0	0	0	0	0	0	0	0	0	0	0	0	0
unidentified	559	0	0	0	0	0	0	0	0	0	0	0	0	0	0	0	0	0	0	0	0	0	0	0	0	1	0	0	0	0	0	0	0	0	0	0	0	0	0	0	0	0	0	0	0	0	0	0	0
unidentified	585	0	0	0	0	0	1	0	0	0	0	0	0	0	0	0	0	0	0	0	0	0	0	0	0	0	0	0	0	0	0	0	0	0	0	0	0	0	0	0	0	0	0	0	0	0	0	0	0
unidentified	629	0	0	0	0	0	0	0	0	0	0	0	0	0	0	0	0	0	0	0	0	0	0	0	0	0	0	0	0	0	0	0	0	0	0	0	0	0	0	0	0	0	0	0	0	0	0	0	0
unidentified	634	0	0	0	0	0	0	0	0	0	0	0	0	0	0	0	0	0	0	0	0	0	0	1	0	0	0	0	0	0	0	0	0	0	0	0	0	0	0	0	0	0	0	0	0	0	0	0	0
unidentified	635	0	0	0	0	0	0	0	0	0	0	0	0	0	0	0	1	0	0	0	0	0	0	0	0	0	0	0	0	0	0	0	0	0	0	0	0	0	0	0	0	0	0	0	0	0	0	0	0
unidentified	645	0	0	0	0	0	0	0	0	0	0	0	0	0	0	0	1	0	0	0	0	0	0	0	0	0	0	0	0	0	0	0	0	0	0	0	0	0	0	0	0	0	0	0	0	0	0	0	0
unidentified	666	0	0	0	0	0	0	1	0	0	0	0	0	0	0	0	0	0	0	0	0	0	0	0	0	0	0	0	0	0	0	0	0	0	0	0	0	0	0	0	0	0	0	0	0	0	0	0	0
unidentified	671	0	0	0	0	0	0	0	0	0	0	0	0	0	0	0	0	0	0	0	0	0	0	0	1	0	0	0	0	0	0	0	0	0	0	0	0	0	0	0	0	0	0	0	0	0	0	0	0
unidentified	682	0	0	0	0	0	0	0	0	0	0	0	0	0	0	0	0	0	0	0	0	0	0	0	1	0	0	0	0	0	0	0	0	0	0	0	0	0	0	0	0	0	0	0	0	0	0	0	0
unidentified	702	0	0	0	0	0	0	0	0	0	0	0	0	0	0	0	0	0	0	0	0	0	0	0	0	0	0	0	0	0	0	0	0	0	0	0	1	0	0	0	0	0	0	0	0	0	0	0	0
unidentified	709	0	0	0	0	0	0	0	0	0	0	0	0	0	0	0	0	0	0	0	0	0	0	1	0	0	0	0	0	0	0	0	0	0	0	0	0	0	0	0	0	0	0	0	0	0	0	0	0
unidentified	713	0	0	0	0	0	0	0	0	0	0	0	0	0	0	0	0	0	0	0	0	0	1	0	0	0	0	0	0	0	0	0	0	0	0	0	0	0	0	0	0	0	0	0	0	0	0	0	0
unidentified	724	0	0	0	0	0	0	0	0	0	0	0	0	0	0	0	0	0	0	0	0	0	0	0	0	0	0	0	0	0	0	0	0	0	0	0	0	0	0	0	0	0	0	0	0	0	0	1	0
unidentified	754	0	0	0	0	0	0	0	0	0	0	0	0	0	0	0	0	0	0	0	0	0	0	0	0	0	0	0	0	0	0	0	0	0	0	0	1	0	0	0	0	0	0	0	0	0	0	0	0
unidentified	790	0	0	0	0	0	0	0	0	0	0	0	0	0	0	0	0	0	0	0	0	0	0	0	0	0	0	0	0	0	0	0	0	1	0	0	0	0	0	0	0	0	0	0	0	0	0	0	0
unidentified	803	0	0	0	0	0	0	0	0	0	0	0	0	0	0	0	0	0	0	0	0	0	0	0	0	0	1	0	0	0	0	0	0	0	0	0	0	0	0	0	0	0	0	0	0	0	0	0	0
unidentified	813	0	0	0	0	0	0	0	0	0	0	0	0	0	0	0	0	0	0	0	0	0	0	0	0	0	0	0	0	0	0	0	1	0	0	0	0	0	0	0	0	0	0	0	0	0	0	0	0
unidentified	819	0	0	0	0	0	0	0	0	0	0	0	0	0	1	0	0	0	0	0	0	0	0	0	0	0	0	0	0	0	0	0	0	0	0	0	0	0	0	0	0	0	0	0	0	0	0	0	0
unidentified	842	0	0	0	0	0	0	0	0	0	0	0	0	0	0	0	1	0	0	0	0	0	0	0	0	0	0	0	0	0	0	0	0	0	0	0	0	0	0	0	0	0	0	0	0	0	0	0	0
unidentified	851	0	0	0	0	0	0	0	0	0	0	0	0	0	0	0	0	0	0	0	0	0	0	0	0	1	0	0	0	0	0	0	0	0	0	0	0	0	0	0	0	0	0	0	0	0	0	0	0
unidentified	862	0	0	0	0	0	0	0	0	0	0	0	0	0	0	0	0	0	0	0	0	0	0	0	0	0	1	0	0	0	0	0	0	0	0	0	0	0	0	0	0	0	0	0	0	0	0	0	0
unidentified	865	0	0	0	0	0	0	0	0	0	0	0	0	0	0	0	0	0	0	0	0	0	0	0	0	0	0	0	0	0	0	0	0	0	0	0	0	0	0	0	0	0	0	0	0	0	0	0	0
unidentified	866	0	0	0	0	0	0	0	0	0	0	0	0	0	0	0	0	0	0	0	0	0	0	0	0	0	0	0	0	0	0	0	0	0	0	0	1	0	0	0	0	0	0	0	0	0	0	0	0
unidentified	871	0	0	0	0	0	0	0	0	0	0	0	0	0	0	0	0	0	0	0	0	0	0	0	0	0	0	0	0	0	0	0	0	0	0	0	0	0	0	0	0	0	0	0	0	0	0	0	0
unidentified	873	0	0	0	0	0	0	0	0	0	0	0	0	0	0	0	0	0	0	0	0	0	0	0	0	0	0	0	0	0	0	0	0	0	0	0	0	0	0	0	1	0	0	0	0	0	0	0	0
unidentified	878	0	0	0	0	0	0	0	0	0	0	0	0	0	0	0	0	0	0	0	0	0	0	0	0	0	0	1	0	0	0	0	0	0	0	0	0	0	0	0	0	0	0	0	0	0	0	0	0
unidentified	881	0	0	0	0	0	0	0	0	0	0	0	0	0	0	0	0	0	0	0	0	0	0	0	0	1	0	0	0	0	0	0	0	0	0	0	0	0	0	0	0	0	0	0	0	0	0	0	0
unidentified	883	0	0	0	0	0	0	0	0	0	0	0	0	0	0	0	0	0	0	0	0	0	0	0	1	0	0	0	0	0	0	0	0	0	0	0	0	0	0	0	0	0	0	0	0	0	0	0	0
unidentified	889	0	0	0	0	0	0	0	0	0	0	0	0	0	0	0	0	0	0	0	0	1	0	0	0	0	0	0	0	0	0	0	0	0	0	0	0	0	0	0	0	0	0	0	0	0	0	0	0
unidentified	901	0	0	0	0	0	0	0	0	0	0	0	0	0	0	0	0	0	0	0	0	0	0	0	0	0	0	1	0	0	0	0	0	0	0	0	0	0	0	0	0	0	0	0	0	0	0	0	0
unidentified	997	0	0	0	0	0	0	0	0	0	0	0	0	0	0	0	0	0	0	0	0	0	0	0	0	0	0	0	0	0	0	0	0	0	0	0	1	0	0	0	0	0	0	0	0	0	0	0	0
unidentified	1010	0	0	0	0	0	0	0	0	0	0	0	0	0	0	0	0	0	0	0	0	0	0	0	0	0	1	0	0	0	0	0	0	0	0	0	0	0	0	0	0	0	0	0	0	0	0	0	0
unidentified	1052	0	0	0	0	0	0	0	0	0	0	0	0	0	0	0	0	0	0	0	0	0	0	0	0	0	0	0	0	0	0	0	0	0	0	0	0	0	0	0	1	0	0	0	0	0	0	0	0
unidentified	1061	0	0	0	0	0	0	0	0	0	0	0	0	0	0	0	0	0	0	0	0	0	0	0	0	1	0	0	0	0	0	0	0	0	0	0	0	0	0	0	0	0	0	0	0	0	0	0	0
unidentified	1084	0	0	0	0	0	0	0	0	0	1	0	0	0	0	0	0	0	0	0	0	0	0	0	0	0	0	0	0	0	0	0	0	0	0	0	0	0	0	0	0	0	0	0	0	0	0	0	0
unidentified	1087	0	0	0	0	0	0	0	0	0	0	0	0	0	0	0	0	0	0	0	0	1	0	0	0	0	0	0	0	0	0	0	0	0	0	0	0	0	0	0	0	0	0	0	0	0	0	0	0
unidentified	1139	0	0	0	0	0	0	0	0	0	0	0	0	0	0	0	0	0	0	0	0	0	0	0	0	0	0	0	0	0	0	0	0	1	0	0	0	0	0	0	0	0	0	0	0	0	0	0	0
unidentified	1146	0	0	0	0	0	0	0	0	0	0	0	0	0	0	0	0	0	0	0	0	0	0	0	0	0	1	0	0	0	0	0	0	0	0	0	0	0	0	0	0	0	0	0	0	0	0	0	0
unidentified	1148	0	0	0	0	0	0	0	0	0	0	0	0	0	1	0	0	0	0	0	0	0	0	0	0	0	0	0	0	0	0	0	0	0	0	0	0	0	0	0	0	0	0	0	0	0	0	0	0
unidentified	1173	0	0	0	0	0	0	0	0	0	0	0	1	0	0	0	0	0	0	0	0	0	0	0	0	0	0	0	0	0	0	0	0	0	0	0	0	0	0	0	0	0	0	0	0	0	0	0	0
unidentified	1181	0	0	0	0	0	0	0	0	0	0	0	0	1	0	0	0	0	0	0	0	0	0	0	0	0	0	0	0	0	0	0	0	0	0	0	0	0	0	0	0	0	0	0	0	0	0	0	0
unidentified	1206	0	0	0	0	0	0	0	0	0	0	0	0	0	0	0	0	0	0	0	0	1	0	0	0	0	0	0	0	0	0	0	0	0	0	0	0	0	0	0	0	0	0	0	0	0	0	0	0
unidentified	1235	0	0	0	0	0	0	0	0	0	0	0	0	0	0	0	0	0	0	0	0	0	0	0	0	0	0	0	0	0	0	0	0	0	0	1	0	0	0	0	0	0	0	0	0	0	0	0	0
unidentified	1245	0	0	0	0	0	0	0	0	0	0	0	0	0	0	0	0	0	0	0	0	0	0	0	0	0	0	0	0	1	0	0	0	0	0	0	0	0	0	0	0	0	0	0	0	0	0	0	0
unidentified	1261	0	0	0	0	0	0	0	0	0	0	0	0	0	0	0	1	0	0	0	0	0	0	0	0	0	0	0	0	0	0	0	0	0	0	0	0	0	0	0	0	0	0	0	0	0	0	0	0
unidentified	1273	0	0	0	0	0	0	0	0	0	0	0	0	0	0	0	0	0	0	0	0	0	0	0	1	0	0	0	0	0	0	0	0	0	0	0	0	0	0	0	0	0	0	0	0	0	0	0	0
unidentified	1348	0	0	0	0	0	0	0	0	0	0	0	0	0	0	0	0	0	0	0	0	0	0	0	0	0	0	0	0	0	0	0	0	0	0	0	0	0	0	0	0	0	0	0	0	0	0	0	0
unidentified	1356	0	0	0	0	0	0	0	0	0	0	0	0	0	0	0	0	0	0	0	0	0	0	0	0	0	0	0	0	0	0	0	0	0	0	0	0	0	0	0	0	0	0	0	0	0	0	0	0
unidentified	1383	0	0	0	0	0	0	0	0	0	0	0	0	0	0	0	0	0	0	0	0	0	0	0	0	0	0	0	0	0	0	0	0	0	0	0	0	0	0	0	0	0	1	0	0	0	0	0	0
unidentified	1395	0	0	0	0	0	0	0	0	0	0	0	0	0	0	0	0	0	0	0	0	0	0	0	0	1	0	0	0	0	0	0	0	0	0	0	0	0	0	0	0	0	0	0	0	0	0	0	0
unidentified	1419	0	0	0	0	0	0	0	0	0	0	0	0	0	0	0	0	0	0	0	0	0	0	0	1	0	0	0	0	0	0	0	0	0	0	0	0	0	0	0	0	0	0	0	0	0	0	0	0
unidentified	1450	0	1	0	0	0	0	0	0	0	0	0	0	0	0	0	0	0	0	0	0	0	0	0	0	0	0	0	0	0	0	0	0	0	0	0	0	0	0	0	0	0	0	0	0	0	0	0	0
unidentified	1480	0	0	0	0	0	0	0	0	0	0	1	0	0	0	0	0	0	0	0	0	0	0	0	0	0	0	0	0	0	0	0	0	0	0	0	0	0	0	0	0	0	0	0	0	0	0	0	0
unidentified	1507	0	0	0	0	0	0	0	0	0	0	0	0	0	0	0	0	0	0	0	0	0	0	0	0	0	0	0	1	0	0	0	0	0	0	0	0	0	0	0	0	0	0	0	0	0	0	0	0
unidentified	1511	0	0	0	0	0	0	0	0	0	0	1	0	0	0	0	0	0	0	0	0	0	0	0	0	0	0	0	0	0	0	0	0	0	0	0	0	0	0	0	0	0	0	0	0	0	0	0	0
unidentified	1534	0	0	0	0	0	0	0	0	0	0	0	0	0	0	0	0	0	0	0	0	0	0	0	0	1	0	0	0	0	0	0	0	0	0	0	0	0	0	0	0	0	0	0	0	0	0	0	0
unidentified	1548	0	0	0	0	0	0	0	0	0	0	0	0	0	0	0	0	0	0	0	0	0	0	0	0	0	0	0	0	0	0	0	0	0	0	0	1	0	0	0	0	0	0	0	0	0	0	0	0
unidentified	1562	0	0	0	0	0	0	0	0	0	0	0	0	0	0	0	0	0	0	0	0	0	0	0	0	0	0	0	0	0	0	1	0	0	0	0	0	0	0	0	0	0	0	0	0	0	0	0	0
unidentified	1565	0	0	0	0	0	0	0	0	0	0	0	0	0	0	0	0	0	0	0	0	0	0	0	0	0	0	0	0	0	0	0	0	0	0	0	0	0	0	0	0	0	0	0	0	0	0	0	0
unidentified	1595	0	0	0	0	0	0	0	0	0	0	0	0	0	0	0	0	0	0	0	0	0	0	0	0	0	1	0	0	0	0	0	0	0	0	0	0	0	0	0	0	0	0	0	0	0	0	0	0
unidentified	1597	0	0	0	0	0	0	0	0	0	0	0	0	0	0	0	0	0	0	0	0	1	0	0	0	0	0	0	0	0	0	0	0	0	0	0	0	0	0	0	0	0	0	0	0	0	0	0	0
unidentified	1603	0	0	0	0	0	0	0	0	0	0	0	0	0	0	0	0	0	0	0	0	1	0	0	0	0	0	0	0	0	0	0	0	0	0	0	0	0	0	0	0	0	0	0	0	0	0	0	0
unidentified	1604	0	0	0	0	0	0	0	0	0	0	0	0	0	0	0	0	0	0	0	0	0	0	0	0	1	0	0	0	0	0	0	0	0	0	0	0	0	0	0	0	0	0	0	0	0	0	0	0
unidentified	1628	0	0	0	0	0	0	0	0	0	0	0	0	0	0	0	0	0	0	0	0	0	0	0	0	1	0	0	0	0	0	0	0	0	0	0	0	0	0	0	0	0	0	0	0	0	0	0	0
unidentified	1658	0	0	0	0	0	0	0	0	0	0	0	0	0	0	0	0	0	0	0	0	1	0	0	0	0	0	0	0	0	0	0	0	0	0	0	0	0	0	0	0	0	0	0	0	0	0	0	0
unidentified	1660	0	0	0	0	0	0	0	0	0	0	0	0	0	0	0	0	0	0	0	0	0	0	0	0	0	0	0	0	0	0	0	0	0	0	0	1	0	0	0	0	0	0	0	0	0	0	0	0
unidentified	1665	0	0	0	0	0	0	0	0	0	0	0	0	0	0	0	0	0	0	0	0	0	0	0	0	0	0	0	0	0	0	0	0	0	0	0	0	0	0	0	0	0	0	0	0	0	0	0	0
unidentified	1694	0	0	0	0	0	0	0	0	0	0	0	0	0	0	0	0	0	0	0	0	0	0	0	0	0	0	0	0	0	0	0	0	0	0	0	1	0	0	0	0	0	0	0	0	0	0	0	0
unidentified	1713	0	0	0	0	0	0	0	0	0	0	0	0	0	1	0	0	0	0	0	0	0	0	0	0	0	0	0	0	0	0	0	0	0	0	0	0	0	0	0	0	0	0	0	0	0	0	0	0
unidentified	1758	0	0	0	0	0	0	0	0	0	0	0	0	0	0	0	0	0	0	0	0	0	0	0	0	0	1	0	0	0	0	0	0	0	0	0	0	0	0	0	0	0	0	0	0	0	0	0	0
unidentified	1788	0	0	0	0	0	0	0	0	0	0	0	0	0	0	0	0	0	0	0	0	0	0	0	0	0	0	0	0	0	0	0	0	0	0	0	0	0	0	0	0	0	0	0	0	0	0	0	0
unidentified	1800	0	0	0	0	0	0	0	0	0	0	0	0	0	0	0	0	0	0	0	1	0	0	0	0	0	0	0	0	0	0	0	0	0	0	0	0	0	0	0	0	0	0	0	0	0	0	0	0
unidentified	1801	0	0	0	0	0	0	0	0	0	1	0	0	0	0	0	0	0	0	0	0	0	0	0	0	0	0	0	0	0	0	0	0	0	0	0	0	0	0	0	0	0	0	0	0	0	0	0	0
unidentified	1813	0	0	0	0	0	0	0	0	0	0	0	0	0	0	0	0	0	0	0	0	1	0	0	0	0	0	0	0	0	0	0	0	0	0	0	0	0	0	0	0	0	0	0	0	0	0	0	0
unidentified	1817	0	0	0	0	0	0	1	0	0	0	0	0	0	0	0	0	0	0	0	0	0	0	0	0	0	0	0	0	0	0	0	0	0	0	0	0	0	0	0	0	0	0	0	0	0	0	0	0
unidentified	1819	0	0	0	0	0	0	1	0	0	0	0	0	0	0	0	0	0	0	0	0	0	0	0	0	0	0	0	0	0	0	0	0	0	0	0	0	0	0	0	0	0	0	0	0	0	0	0	0
unidentified	1821	0	0	0	0	0	0	0	0	0	0	0	0	0	0	0	0	0	0	0	0	0	0	0	1	0	0	0	0	0	0	0	0	0	0	0	0	0	0	0	0	0	0	0	0	0	0	0	0
unidentified	1823	0	0	0	0	0	0	0	0	0	0	0	0	0	0	0	0	0	0	0	0	0	0	0	0	1	0	0	0	0	0	0	0	0	0	0	0	0	0	0	0	0	0	0	0	0	0	0	0
unidentified	1833	0	0	0	0	0	0	0	0	0	0	0	0	0	0	0	0	0	0	0	0	0	0	0	0	0	1	0	0	0	0	0	0	0	0	0	0	0	0	0	0	0	0	0	0	0	0	0	0
unidentified	1835	0	0	0	0	0	0	0	0	0	0	0	0	0	0	0	0	0	0	0	0	0	0	0	0	0	1	0	0	0	0	0	0	0	0	0	0	0	0	0	0	0	0	0	0	0	0	0	0
unidentified	1838	0	0	0	0	0	0	0	0	0	0	0	0	0	0	0	0	0	0	0	0	0	0	0	0	0	0	0	0	0	0	0	0	0	0	0	0	0	0	0	0	0	0	0	0	0	0	0	0
unidentified	1844	0	0	0	0	0	0	0	0	0	0	0	0	0	0	0	0	0	0	0	0	0	0	0	0	1	0	0	0	0	0	0	0	0	0	0	0	0	0	0	0	0	0	0	0	0	0	0	0
unidentified	1858	0	0	0	0	0	0	0	0	0	0	0	0	0	0	0	0	0	0	0	0	0	0	0	0	0	1	0	0	0	0	0	0	0	0	0	0	0	0	0	0	0	0	0	0	0	0	0	0
unidentified	1862	0	0	0	0	0	0	0	0	0	0	0	0	0	0	0	0	0	0	0	0	0	0	0	0	1	0	0	0	0	0	0	0	0	0	0	0	0	0	0	0	0	0	0	0	0	0	0	0
unidentified	1872	0	0	0	0	0	0	0	0	0	0	0	0	0	0	0	0	0	0	0	0	0	0	0	0	0	0	0	0	0	0	0	0	0	0	0	1	0	0	0	0	0	0	0	0	0	0	0	0
unidentified	1884	0	0	0	0	0	0	0	0	0	0	0	0	0	0	0	0	0	0	0	0	0	0	0	0	0	0	0	0	0	0	0	0	0	0	0	0	0	0	0	0	0	0	1	0	0	0	0	0
unidentified	1897	0	0	0	0	0	0	0	0	0	0	0	0	0	0	0	1	0	0	0	0	0	0	0	0	0	0	0	0	0	0	0	0	0	0	0	0	0	0	0	0	0	0	0	0	0	0	0	0
unidentified	1902	0	0	0	0	0	0	0	0	0	0	0	0	0	0	0	0	0	0	0	0	0	0	0	0	0	1	0	0	0	0	0	0	0	0	0	0	0	0	0	0	0	0	0	0	0	0	0	0
unidentified	1914	0	0	0	0	0	0	0	0	0	0	0	0	0	0	0	0	0	0	0	0	0	0	0	0	1	0	0	0	0	0	0	0	0	0	0	0	0	0	0	0	0	0	0	0	0	0	0	0
unidentified	1956	0	0	0	0	0	0	0	0	0	0	0	0	0	0	0	0	0	0	0	0	0	0	0	0	0	0	0	0	0	0	0	0	0	0	0	0	0	0	0	0	0	0	0	0	0	0	0	0
unidentified	1967	0	0	0	0	0	0	0	0	0	0	0	0	0	0	0	1	0	0	0	0	0	0	0	0	0	0	0	0	0	0	0	0	0	0	0	0	0	0	0	0	0	0	0	0	0	0	0	0
unidentified	1968	0	0	0	0	0	0	0	0	0	0	0	0	0	0	0	0	0	0	1	0	0	0	0	0	0	0	0	0	0	0	0	0	0	0	0	0	0	0	0	0	0	0	0	0	0	0	0	0
unidentified	1969	0	0	0	0	0	0	0	0	0	0	0	0	0	0	0	0	0	0	0	0	0	0	0	0	0	0	0	0	0	0	0	0	0	0	0	0	0	0	0	0	0	0	0	0	0	1	0	0
unidentified	1980	0	0	0	0	0	0	0	0	0	0	0	0	0	0	0	1	0	0	0	0	0	0	0	0	0	0	0	0	0	0	0	0	0	0	0	0	0	0	0	0	0	0	0	0	0	0	0	0
unidentified	1991	0	0	0	0	0	0	0	0	0	0	0	0	0	0	0	0	0	0	0	0	0	0	0	0	0	0	0	0	0	0	0	0	0	0	0	0	0	0	0	0	0	0	0	0	0	0	0	0
unidentified	1993	0	0	0	0	0	0	0	0	0	0	0	0	0	0	1	0	0	0	0	0	0	0	0	0	0	0	0	0	0	0	0	0	0	0	0	0	0	0	0	0	0	0	0	0	0	0	0	0
unidentified	2005	0	0	0	0	0	0	0	0	0	0	0	0	0	0	0	1	0	0	0	0	0	0	0	0	0	0	0	0	0	0	0	0	0	0	0	0	0	0	0	0	0	0	0	0	0	0	0	0
unidentified	2012	0	0	0	0	0	0	0	0	0	0	0	0	0	0	0	0	0	0	0	0	0	0	0	0	0	0	0	0	0	0	0	0	0	0	0	0	0	0	0	0	0	0	0	0	0	0	0	0
unidentified	2018	0	0	0	0	0	0	0	0	0	0	0	0	0	0	0	0	0	0	0	0	1	0	0	0	0	0	0	0	0	0	0	0	0	0	0	0	0	0	0	0	0	0	0	0	0	0	0	0
unidentified	2025	0	0	0	0	0	0	0	0	0	0	0	0	0	0	0	0	0	0	0	0	0	0	0	0	0	0	0	0	0	0	0	0	0	0	0	1	0	0	0	0	0	0	0	0	0	0	0	0
unidentified	2037	0	0	0	0	0	0	0	0	0	0	0	0	0	0	0	0	0	0	0	0	0	0	0	0	0	0	0	0	0	0	0	0	0	0	0	0	1	0	0	0	0	0	0	0	0	0	0	0
unidentified	2045	0	0	0	0	0	0	0	0	0	0	0	0	0	0	0	0	0	0	0	0	0	0	0	0	0	0	0	0	0	0	0	0	0	0	0	0	0	0	0	0	0	0	0	0	0	0	0	0
unidentified	2053	0	0	0	0	0	0	0	0	0	0	0	0	0	0	0	1	0	0	0	0	0	0	0	0	0	0	0	0	0	0	0	0	0	0	0	0	0	0	0	0	0	0	0	0	0	0	0	0
unidentified	2066	0	0	0	0	0	0	0	0	0	0	0	0	0	0	0	0	0	0	0	0	0	0	0	0	0	0	0	0	0	1	0	0	0	0	0	0	0	0	0	0	0	0	0	0	0	0	0	0
unidentified	2091	0	0	0	0	0	0	0	0	0	0	0	0	0	0	0	1	0	0	0	0	0	0	0	0	0	0	0	0	0	0	0	0	0	0	0	0	0	0	0	0	0	0	0	0	0	0	0	0
unidentified	2092	0	0	0	0	0	0	0	0	0	0	0	0	0	0	0	0	0	0	0	0	0	0	0	0	1	0	0	0	0	0	0	0	0	0	0	0	0	0	0	0	0	0	0	0	0	0	0	0
unidentified	2098	0	0	0	0	0	0	0	0	0	0	0	0	0	0	0	0	0	0	0	0	0	0	0	0	0	0	0	0	0	0	0	0	0	0	0	0	0	0	1	0	0	0	0	0	0	0	0	0
unidentified	2107	0	0	0	0	0	0	0	0	0	0	0	0	0	0	0	0	0	0	0	0	0	0	0	0	1	0	0	0	0	0	0	0	0	0	0	0	0	0	0	0	0	0	0	0	0	0	0	0
unidentified	2111	0	0	0	0	0	0	0	0	0	0	0	0	0	0	0	0	0	0	0	0	1	0	0	0	0	0	0	0	0	0	0	0	0	0	0	0	0	0	0	0	0	0	0	0	0	0	0	0
unidentified	2121	0	0	0	0	0	0	0	0	0	0	0	0	0	0	0	0	0	0	0	0	1	0	0	0	0	0	0	0	0	0	0	0	0	0	0	0	0	0	0	0	0	0	0	0	0	0	0	0
unidentified	2156	0	0	0	0	0	0	0	0	0	0	0	0	0	0	0	0	0	0	0	0	0	0	0	0	0	0	0	0	0	0	0	0	0	0	0	0	0	0	0	0	0	0	0	0	0	0	0	0
unidentified	2171	0	0	0	0	0	0	0	0	0	0	0	0	0	0	0	0	0	0	0	0	0	0	0	0	0	0	0	0	0	0	0	0	0	0	0	0	0	0	0	1	0	0	0	0	0	0	0	0
unidentified	2189	0	0	0	0	0	0	1	0	0	0	0	0	0	0	0	0	0	0	0	0	0	0	0	0	0	0	0	0	0	0	0	0	0	0	0	0	0	0	0	0	0	0	0	0	0	0	0	0
unidentified	2197	0	0	0	0	0	0	0	0	0	0	0	0	0	0	0	0	0	0	0	0	0	0	0	0	0	0	0	0	0	0	1	0	0	0	0	0	0	0	0	0	0	0	0	0	0	0	0	0
unidentified	2223	0	0	0	0	0	0	1	0	0	0	0	0	0	0	0	0	0	0	0	0	0	0	0	0	0	0	0	0	0	0	0	0	0	0	0	0	0	0	0	0	0	0	0	0	0	0	0	0
unidentified	2227	0	0	0	0	0	0	0	0	0	0	0	0	0	0	0	0	0	0	0	0	0	0	0	0	0	0	0	0	0	0	0	0	0	0	0	0	0	0	0	1	0	0	0	0	0	0	0	0
unidentified	2243	0	0	0	0	0	0	0	0	0	0	0	0	0	0	0	0	0	0	0	0	1	0	0	0	0	0	0	0	0	0	0	0	0	0	0	0	0	0	0	0	0	0	0	0	0	0	0	0
unidentified	2268	0	0	0	0	0	0	0	0	0	0	0	0	0	0	0	0	0	0	0	0	0	0	0	0	0	0	0	0	0	0	0	0	0	0	0	0	0	0	0	0	0	0	0	0	0	0	0	0
unidentified	2277	0	0	0	0	0	0	0	0	0	0	0	0	0	0	0	0	0	0	0	0	0	0	0	0	0	0	0	0	0	0	0	0	0	0	0	0	0	1	0	0	0	0	0	0	0	0	0	0
unidentified	2283	0	0	0	0	0	0	0	0	0	0	0	0	0	0	0	0	0	0	0	1	0	0	0	0	0	0	0	0	0	0	0	0	0	0	0	0	0	0	0	0	0	0	0	0	0	0	0	0
unidentified	2288	0	0	0	0	0	0	0	0	0	0	0	0	0	0	0	0	0	0	0	0	0	0	0	0	0	0	0	1	0	0	0	0	0	0	0	0	0	0	0	0	0	0	0	0	0	0	0	0
unidentified	2293	0	0	0	0	0	0	0	0	0	0	0	0	0	0	0	0	0	0	0	0	0	0	0	0	0	0	0	0	0	0	0	0	0	0	0	0	0	0	0	0	0	0	0	0	0	0	0	0
unidentified	2294	0	0	0	0	0	0	0	0	0	0	0	0	0	0	0	0	0	0	0	0	0	0	0	0	1	0	0	0	0	0	0	0	0	0	0	0	0	0	0	0	0	0	0	0	0	0	0	0
unidentified	2345	0	0	0	0	0	0	0	0	0	0	0	0	0	0	0	0	0	0	0	0	0	0	0	0	1	0	0	0	0	0	0	0	0	0	0	0	0	0	0	0	0	0	0	0	0	0	0	0
unidentified	2350	0	0	0	0	0	0	0	0	0	0	0	0	0	0	0	0	0	0	0	0	0	0	0	0	0	0	0	0	0	0	0	0	0	0	0	0	0	0	0	0	0	0	0	0	0	0	0	0
unidentified	2367	0	0	0	0	0	0	0	0	0	0	0	0	0	0	0	0	0	0	0	0	0	0	0	0	0	0	0	0	0	0	0	0	0	0	0	0	0	0	0	0	0	0	0	0	0	0	0	0
unidentified	394	0	0	0	0	0	0	0	0	0	0	0	0	0	0	0	0	0	0	0	0	0	0	0	0	0	0	0	0	0	0	0	0	0	0	0	0	0	0	0	0	0	0	0	0	0	0	0	0
unidentified	441	0	0	0	0	0	0	0	0	0	0	0	0	0	0	0	0	0	0	0	0	0	0	0	0	0	0	0	0	0	0	0	0	0	0	0	0	0	0	0	0	0	0	0	0	0	0	0	0
unidentified	1359	0	0	0	0	0	0	0	0	0	0	0	0	0	0	0	0	0	0	0	0	0	0	0	0	0	0	0	0	0	0	0	0	0	0	0	0	0	0	0	0	0	0	0	0	0	0	0	0
[truncated: 13 more columns]

## Sheet: new taxonomy JH
#OTU ID	Phylum	Sub-phylum	Class	Order -ALES	Family -CEAE	Genus	lowest level
2151	Euryarchaeota	Halobacteria		Halobacteriales	Halobacteriaceae		Halobacteriaceae
670	Euryarchaeota	Halobacteria		Halobacteriales	Halobacteriaceae		Halobacteriaceae
1938	Euryarchaeota	Halobacteria		Halobacteriales	Halobacteriaceae		Halobacteriaceae
347	Euryarchaeota	Methanobacteria		Methanobacteriales	Methanobacteriaceae	Methanobrevibacter	Methanobrevibacter
1192	Acidobacteria	Acidobacteria		Acidobacteriales	Acidobacteriaceae		Acidobacteriaceae
1540	Acidobacteria	Acidobacteria		Acidobacteriales	Acidobacteriaceae		Acidobacteriaceae
505	Acidobacteria	Acidobacteria		Acidobacteriales	Acidobacteriaceae		Acidobacteriaceae
1718	Acidobacteria	Acidobacteria		Acidobacteriales	Acidobacteriaceae		Acidobacteriaceae
1860	Acidobacteria	Acidobacteria		Acidobacteriales	Acidobacteriaceae		Acidobacteriaceae
38	Acidobacteria	Acidobacteria		Acidobacteriales	Acidobacteriaceae		Acidobacteriaceae
1895	Actinobacteria	Actinobacteria	Actinobacteridae	Actinomycetales	Actinomycetaceae	Actinobaculum	Actinobaculum
520	Actinobacteria	Actinobacteria	Actinobacteridae	Actinomycetales	Actinomycetaceae	Actinomyces	Actinomyces
1809	Actinobacteria	Actinobacteria	Actinobacteridae	Actinomycetales	Actinomycetaceae	Actinomyces	Actinomyces
616	Actinobacteria	Actinobacteria	Actinobacteridae	Actinomycetales	Actinomycetaceae	Actinomyces	Actinomyces
474	Actinobacteria	Actinobacteria	Actinobacteridae	Actinomycetales	Actinomycetaceae	Actinomyces	Actinomyces
462	Actinobacteria	Actinobacteria	Actinobacteridae	Actinomycetales	Actinomycetaceae	Actinomyces	Actinomyces
1908	Actinobacteria	Actinobacteria	Actinobacteridae	Actinomycetales	Actinomycetaceae	Actinomyces	Actinomyces
2307	Actinobacteria	Actinobacteria	Actinobacteridae	Actinomycetales	Actinomycetaceae	Actinomyces	Actinomyces
777	Actinobacteria	Actinobacteria	Actinobacteridae	Actinomycetales	Actinomycetaceae	Arcanobacterium	Arcanobacterium
297	Actinobacteria	Actinobacteria	Actinobacteridae	Actinomycetales	Actinomycetaceae	Mobiluncus	Mobiluncus
369	Actinobacteria	Actinobacteria	Actinobacteridae	Actinomycetales	Actinomycetaceae	Mobiluncus	Mobiluncus
439	Actinobacteria	Actinobacteria	Actinobacteridae	Actinomycetales	Actinomycetaceae	Mobiluncus	Mobiluncus
2024	Actinobacteria	Actinobacteria	Actinobacteridae	Actinomycetales	Actinomycetaceae	Mobiluncus	Mobiluncus
2044	Actinobacteria	Actinobacteria	Actinobacteridae	Actinomycetales	Actinomycetaceae	Mobiluncus	Mobiluncus
245	Actinobacteria	Actinobacteria	Actinobacteridae	Actinomycetales	Actinomycetaceae	Varibaculum	Varibaculum
257	Actinobacteria	Actinobacteria	Actinobacteridae	Actinomycetales	Actinomycetaceae	Varibaculum	Varibaculum
782	Actinobacteria	Actinobacteria	Actinobacteridae	Actinomycetales	Actinomycetaceae	Varibaculum	Varibaculum
78	Actinobacteria	Actinobacteria	Actinobacteridae	Actinomycetales	Actinomycetaceae	Varibaculum	Varibaculum
91	Actinobacteria	Actinobacteria	Actinobacteridae	Actinomycetales	Actinomycetaceae	Varibaculum	Varibaculum
534	Actinobacteria	Actinobacteria	Actinobacteridae	Actinomycetales	Actinomycetaceae	Varibaculum	Varibaculum
1106	Actinobacteria	Actinobacteria	Actinobacteridae	Actinomycetales	Actinomycetaceae	Varibaculum	Varibaculum
1204	Actinobacteria	Actinobacteria	Actinobacteridae	Actinomycetales	Actinomycetaceae	Varibaculum	Varibaculum
1247	Actinobacteria	Actinobacteria	Actinobacteridae	Actinomycetales	Actinomycetaceae	Varibaculum	Varibaculum
2138	Actinobacteria	Actinobacteria	Actinobacteridae	Actinomycetales	Actinomycetaceae	Varibaculum	Varibaculum
869	Actinobacteria	Actinobacteria	Actinobacteridae	Actinomycetales	Actinomycetaceae		Actinomycetaceae
1986	Actinobacteria	Actinobacteria	Actinobacteridae	Actinomycetales	Corynebacteriaceae	Corynebacterium	Corynebacterium
2097	Actinobacteria	Actinobacteria	Actinobacteridae	Actinomycetales	Corynebacteriaceae	Corynebacterium	Corynebacterium
178	Actinobacteria	Actinobacteria	Actinobacteridae	Actinomycetales	Corynebacteriaceae	Corynebacterium	Corynebacterium
1120	Actinobacteria	Actinobacteria	Actinobacteridae	Actinomycetales	Corynebacteriaceae	Corynebacterium	Corynebacterium
1017	Actinobacteria	Actinobacteria	Actinobacteridae	Actinomycetales	Corynebacteriaceae	Corynebacterium	Corynebacterium
124	Actinobacteria	Actinobacteria	Actinobacteridae	Actinomycetales	Corynebacteriaceae	Corynebacterium	Corynebacterium
907	Actinobacteria	Actinobacteria	Actinobacteridae	Actinomycetales	Corynebacteriaceae	Corynebacterium	Corynebacterium
219	Actinobacteria	Actinobacteria	Actinobacteridae	Actinomycetales	Corynebacteriaceae	Corynebacterium	Corynebacterium
11	Actinobacteria	Actinobacteria	Actinobacteridae	Actinomycetales	Corynebacteriaceae	Corynebacterium	Corynebacterium
336	Actinobacteria	Actinobacteria	Actinobacteridae	Actinomycetales	Corynebacteriaceae	Corynebacterium	Corynebacterium
812	Actinobacteria	Actinobacteria	Actinobacteridae	Actinomycetales	Corynebacteriaceae	Corynebacterium	Corynebacterium
1421	Actinobacteria	Actinobacteria	Actinobacteridae	Actinomycetales	Corynebacteriaceae	Corynebacterium	Corynebacterium
1322	Actinobacteria	Actinobacteria	Actinobacteridae	Actinomycetales	Corynebacteriaceae	Corynebacterium	Corynebacterium
2319	Actinobacteria	Actinobacteria	Actinobacteridae	Actinomycetales	Corynebacteriaceae	Corynebacterium	Corynebacterium
1090	Actinobacteria	Actinobacteria	Actinobacteridae	Actinomycetales	Corynebacteriaceae	Corynebacterium	Corynebacterium
2191	Actinobacteria	Actinobacteria	Actinobacteridae	Actinomycetales	Corynebacteriaceae	Corynebacterium	Corynebacterium
264	Actinobacteria	Actinobacteria	Actinobacteridae	Actinomycetales	Corynebacteriaceae	Corynebacterium	Corynebacterium
774	Actinobacteria	Actinobacteria	Actinobacteridae	Actinomycetales	Corynebacteriaceae	Corynebacterium	Corynebacterium
925	Actinobacteria	Actinobacteria	Actinobacteridae	Actinomycetales	Corynebacteriaceae	Corynebacterium	Corynebacterium
1186	Actinobacteria	Actinobacteria	Actinobacteridae	Actinomycetales	Corynebacteriaceae	Corynebacterium	Corynebacterium
1896	Actinobacteria	Actinobacteria	Actinobacteridae	Actinomycetales	Corynebacteriaceae	Corynebacterium	Corynebacterium
882	Actinobacteria	Actinobacteria	Actinobacteridae	Actinomycetales	Gordoniaceae	Millisia	Millisia
1630	Actinobacteria	Actinobacteria	Actinobacteridae	Actinomycetales	Gordoniaceae	Millisia	Millisia
1018	Actinobacteria	Actinobacteria	Actinobacteridae	Actinomycetales	Gordoniaceae		Gordoniaceae
2199	Actinobacteria	Actinobacteria	Actinobacteridae	Actinomycetales	Mycobacteriaceae	Mycobacterium	Mycobacterium
2222	Actinobacteria	Actinobacteria	Actinobacteridae	Actinomycetales	Nocardiaceae	Rhodococcus	Rhodococcus
1727	Actinobacteria	Actinobacteria	Actinobacteridae	Actinomycetales	Nocardiaceae	Rhodococcus	Rhodococcus
1357	Actinobacteria	Actinobacteria	Actinobacteridae	Actinomycetales	Nocardiaceae	Rhodococcus	Rhodococcus
2272	Actinobacteria	Actinobacteria	Actinobacteridae	Actinomycetales	Nocardiaceae	Rhodococcus	Rhodococcus
833	Actinobacteria	Actinobacteria	Actinobacteridae	Actinomycetales	Williamsiaceae	Williamsia	Williamsia
197	Actinobacteria	Actinobacteria	Actinobacteridae	Actinomycetales	Corynebacterineae		Corynebacterineae
822	Actinobacteria	Actinobacteria	Actinobacteridae	Actinomycetales	Corynebacterineae		Corynebacterineae
1223	Actinobacteria	Actinobacteria	Actinobacteridae	Actinomycetales	Corynebacterineae		Corynebacterineae
1843	Actinobacteria	Actinobacteria	Actinobacteridae	Actinomycetales	Corynebacterineae		Corynebacterineae
839	Actinobacteria	Actinobacteria	Actinobacteridae	Actinomycetales	Corynebacterineae		Corynebacterineae
1515	Actinobacteria	Actinobacteria	Actinobacteridae	Actinomycetales	Corynebacterineae		Corynebacterineae
1491	Actinobacteria	Actinobacteria	Actinobacteridae	Actinomycetales	Corynebacterineae		Corynebacterineae
1553	Actinobacteria	Actinobacteria	Actinobacteridae	Actinomycetales	Corynebacterineae		Corynebacterineae
372	Actinobacteria	Actinobacteria	Actinobacteridae	Actinomycetales	Corynebacterineae		Corynebacterineae
2209	Actinobacteria	Actinobacteria	Actinobacteridae	Actinomycetales	Corynebacterineae		Corynebacterineae
615	Actinobacteria	Actinobacteria	Actinobacteridae	Actinomycetales	Corynebacterineae		Corynebacterineae
25	Actinobacteria	Actinobacteria	Actinobacteridae	Actinomycetales	Corynebacterineae		Corynebacterineae
1745	Actinobacteria	Actinobacteria	Actinobacteridae	Actinomycetales	Corynebacterineae		Corynebacterineae
2361	Actinobacteria	Actinobacteria	Actinobacteridae	Actinomycetales	Corynebacterineae		Corynebacterineae
632	Actinobacteria	Actinobacteria	Actinobacteridae	Actinomycetales	Corynebacterineae		Corynebacterineae
1864	Actinobacteria	Actinobacteria	Actinobacteridae	Actinomycetales	Corynebacterineae		Corynebacterineae
2316	Actinobacteria	Actinobacteria	Actinobacteridae	Actinomycetales	Corynebacterineae		Corynebacterineae
16	Actinobacteria	Actinobacteria	Actinobacteridae	Actinomycetales	Corynebacterineae		Corynebacterineae
945	Actinobacteria	Actinobacteria	Actinobacteridae	Actinomycetales	Corynebacterineae		Corynebacterineae
1183	Actinobacteria	Actinobacteria	Actinobacteridae	Actinomycetales	Corynebacterineae		Corynebacterineae
2070	Actinobacteria	Actinobacteria	Actinobacteridae	Actinomycetales	Corynebacterineae		Corynebacterineae
279	Actinobacteria	Actinobacteria	Actinobacteridae	Actinomycetales	Corynebacterineae		Corynebacterineae
444	Actinobacteria	Actinobacteria	Actinobacteridae	Actinomycetales	Corynebacterineae		Corynebacterineae
648	Actinobacteria	Actinobacteria	Actinobacteridae	Actinomycetales	Corynebacterineae		Corynebacterineae
1015	Actinobacteria	Actinobacteria	Actinobacteridae	Actinomycetales	Corynebacterineae		Corynebacterineae
1216	Actinobacteria	Actinobacteria	Actinobacteridae	Actinomycetales	Corynebacterineae		Corynebacterineae
1224	Actinobacteria	Actinobacteria	Actinobacteridae	Actinomycetales	Corynebacterineae		Corynebacterineae
1255	Actinobacteria	Actinobacteria	Actinobacteridae	Actinomycetales	Corynebacterineae		Corynebacterineae
1458	Actinobacteria	Actinobacteria	Actinobacteridae	Actinomycetales	Corynebacterineae		Corynebacterineae
1545	Actinobacteria	Actinobacteria	Actinobacteridae	Actinomycetales	Corynebacterineae		Corynebacterineae
1550	Actinobacteria	Actinobacteria	Actinobacteridae	Actinomycetales	Corynebacterineae		Corynebacterineae
1690	Actinobacteria	Actinobacteria	Actinobacteridae	Actinomycetales	Corynebacterineae		Corynebacterineae
1734	Actinobacteria	Actinobacteria	Actinobacteridae	Actinomycetales	Corynebacterineae		Corynebacterineae
1773	Actinobacteria	Actinobacteria	Actinobacteridae	Actinomycetales	Corynebacterineae		Corynebacterineae
1795	Actinobacteria	Actinobacteria	Actinobacteridae	Actinomycetales	Corynebacterineae		Corynebacterineae
1826	Actinobacteria	Actinobacteria	Actinobacteridae	Actinomycetales	Corynebacterineae		Corynebacterineae
1848	Actinobacteria	Actinobacteria	Actinobacteridae	Actinomycetales	Corynebacterineae		Corynebacterineae
1985	Actinobacteria	Actinobacteria	Actinobacteridae	Actinomycetales	Corynebacterineae		Corynebacterineae
2186	Actinobacteria	Actinobacteria	Actinobacteridae	Actinomycetales	Corynebacterineae		Corynebacterineae
2211	Actinobacteria	Actinobacteria	Actinobacteridae	Actinomycetales	Corynebacterineae		Corynebacterineae
2309	Actinobacteria	Actinobacteria	Actinobacteridae	Actinomycetales	Corynebacterineae		Corynebacterineae
2019	Actinobacteria	Actinobacteria	Actinobacteridae	Actinomycetales	Geodermatophilaceae	Blastococcus	Blastococcus
496	Actinobacteria	Actinobacteria	Actinobacteridae	Actinomycetales	Beutenbergiaceae	Georgenia	Georgenia
284	Actinobacteria	Actinobacteria	Actinobacteridae	Actinomycetales	Brevibacteriaceae	Brevibacterium	Brevibacterium
130	Actinobacteria	Actinobacteria	Actinobacteridae	Actinomycetales	Brevibacteriaceae	Brevibacterium	Brevibacterium
703	Actinobacteria	Actinobacteria	Actinobacteridae	Actinomycetales	Dermabacteraceae	Brachybacterium	Brachybacterium
277	Actinobacteria	Actinobacteria	Actinobacteridae	Actinomycetales	Dermabacteraceae	Dermabacter	Dermabacter
1935	Actinobacteria	Actinobacteria	Actinobacteridae	Actinomycetales	Dermabacteraceae	Dermabacter	Dermabacter
1570	Actinobacteria	Actinobacteria	Actinobacteridae	Actinomycetales	Dermabacteraceae	Dermabacter	Dermabacter
2198	Actinobacteria	Actinobacteria	Actinobacteridae	Actinomycetales	Dermabacteraceae	Dermabacter	Dermabacter
291	Actinobacteria	Actinobacteria	Actinobacteridae	Actinomycetales	Dermabacteraceae	Dermabacter	Dermabacter
1355	Actinobacteria	Actinobacteria	Actinobacteridae	Actinomycetales	Dermabacteraceae	Dermabacter	Dermabacter
1655	Actinobacteria	Actinobacteria	Actinobacteridae	Actinomycetales	Dermabacteraceae	Dermabacter	Dermabacter
896	Actinobacteria	Actinobacteria	Actinobacteridae	Actinomycetales	Dermacoccaceae	Dermacoccus	Dermacoccus
2047	Actinobacteria	Actinobacteria	Actinobacteridae	Actinomycetales	Dermacoccaceae	Kytococcus	Kytococcus
468	Actinobacteria	Actinobacteria	Actinobacteridae	Actinomycetales	Intrasporangiaceae	Arsenicicoccus	Arsenicicoccus
319	Actinobacteria	Actinobacteria	Actinobacteridae	Actinomycetales	Intrasporangiaceae	Ornithinimicrobium	Ornithinimicrobium
500	Actinobacteria	Actinobacteria	Actinobacteridae	Actinomycetales	Intrasporangiaceae		Intrasporangiaceae
899	Actinobacteria	Actinobacteria	Actinobacteridae	Actinomycetales	Microbacteriaceae	Zimmermannella	Zimmermannella
1420	Actinobacteria	Actinobacteria	Actinobacteridae	Actinomycetales	Microbacteriaceae	Zimmermannella	Zimmermannella
749	Actinobacteria	Actinobacteria	Actinobacteridae	Actinomycetales	Microbacteriaceae		Microbacteriaceae
1325	Actinobacteria	Actinobacteria	Actinobacteridae	Actinomycetales	Microbacteriaceae		Microbacteriaceae
592	Actinobacteria	Actinobacteria	Actinobacteridae	Actinomycetales	Microbacteriaceae		Microbacteriaceae
2046	Actinobacteria	Actinobacteria	Actinobacteridae	Actinomycetales	Microbacteriaceae		Microbacteriaceae
21	Actinobacteria	Actinobacteria	Actinobacteridae	Actinomycetales	Microbacteriaceae		Microbacteriaceae
495	Actinobacteria	Actinobacteria	Actinobacteridae	Actinomycetales	Microbacteriaceae		Microbacteriaceae
935	Actinobacteria	Actinobacteria	Actinobacteridae	Actinomycetales	Microbacteriaceae		Microbacteriaceae
1005	Actinobacteria	Actinobacteria	Actinobacteridae	Actinomycetales	Microbacteriaceae		Microbacteriaceae
1040	Actinobacteria	Actinobacteria	Actinobacteridae	Actinomycetales	Microbacteriaceae		Microbacteriaceae
1260	Actinobacteria	Actinobacteria	Actinobacteridae	Actinomycetales	Microbacteriaceae		Microbacteriaceae
1443	Actinobacteria	Actinobacteria	Actinobacteridae	Actinomycetales	Microbacteriaceae		Microbacteriaceae
1679	Actinobacteria	Actinobacteria	Actinobacteridae	Actinomycetales	Micrococcaceae	Kocuria	Kocuria
1170	Actinobacteria	Actinobacteria	Actinobacteridae	Actinomycetales	Micrococcaceae	Micrococcus	Micrococcus
1754	Actinobacteria	Actinobacteria	Actinobacteridae	Actinomycetales	Micrococcaceae	Rothia	Rothia
2260	Actinobacteria	Actinobacteria	Actinobacteridae	Actinomycetales	Micrococcaceae		Micrococcaceae
1936	Actinobacteria	Actinobacteria	Actinobacteridae	Actinomycetales	Micrococcaceae		Micrococcaceae
1995	Actinobacteria	Actinobacteria	Actinobacteridae	Actinomycetales	Micrococcaceae		Micrococcaceae
1521	Actinobacteria	Actinobacteria	Actinobacteridae	Actinomycetales	Micrococcineae		Micrococcineae
1434	Actinobacteria	Actinobacteria	Actinobacteridae	Actinomycetales	Micrococcineae		Micrococcineae
798	Actinobacteria	Actinobacteria	Actinobacteridae	Actinomycetales	Micrococcineae		Micrococcineae
982	Actinobacteria	Actinobacteria	Actinobacteridae	Actinomycetales	Micrococcineae		Micrococcineae
1495	Actinobacteria	Actinobacteria	Actinobacteridae	Actinomycetales	Micrococcineae		Micrococcineae
2183	Actinobacteria	Actinobacteria	Actinobacteridae	Actinomycetales	Micrococcineae		Micrococcineae
2321	Actinobacteria	Actinobacteria	Actinobacteridae	Actinomycetales	Micrococcineae		Micrococcineae
1382	Actinobacteria	Actinobacteria	Actinobacteridae	Actinomycetales	Micromonosporaceae		Micromonosporaceae
607	Actinobacteria	Actinobacteria	Actinobacteridae	Actinomycetales	Nocardioidaceae	Marmoricola	Marmoricola
747	Actinobacteria	Actinobacteria	Actinobacteridae	Actinomycetales	Nocardioidaceae	Nocardioides	Nocardioides
612	Actinobacteria	Actinobacteria	Actinobacteridae	Actinomycetales	Nocardioidaceae	Nocardioides	Nocardioides
301	Actinobacteria	Actinobacteria	Actinobacteridae	Actinomycetales	Nocardioidaceae	Nocardioides	Nocardioides
542	Actinobacteria	Actinobacteria	Actinobacteridae	Actinomycetales	Nocardioidaceae		Nocardioidaceae
312	Actinobacteria	Actinobacteria	Actinobacteridae	Actinomycetales	Nocardioidaceae		Nocardioidaceae
1030	Actinobacteria	Actinobacteria	Actinobacteridae	Actinomycetales	Propionibacteriaceae	Propionibacterium	Propionibacterium
1811	Actinobacteria	Actinobacteria	Actinobacteridae	Actinomycetales	Propionibacteriaceae		Propionibacteriaceae
681	Actinobacteria	Actinobacteria	Actinobacteridae	Actinomycetales	Pseudonocardiaceae	Pseudonocardia	Pseudonocardia
855	Actinobacteria	Actinobacteria	Actinobacteridae	Actinomycetales	Pseudonocardiaceae		Pseudonocardiaceae
631	Actinobacteria	Actinobacteria	Actinobacteridae	Actinomycetales			Actinomycetales
320	Actinobacteria	Actinobacteria	Actinobacteridae	Actinomycetales	Thermomonosporaceae		Thermomonosporaceae
1929	Actinobacteria	Actinobacteria	Actinobacteridae	Actinomycetales			Actinomycetales
888	Actinobacteria	Actinobacteria	Actinobacteridae	Actinomycetales			Actinomycetales
2103	Actinobacteria	Actinobacteria	Actinobacteridae	Actinomycetales			Actinomycetales
2185	Actinobacteria	Actinobacteria	Actinobacteridae	Actinomycetales			Actinomycetales
2016	Actinobacteria	Actinobacteria	Actinobacteridae	Actinomycetales			Actinomycetales
2031	Actinobacteria	Actinobacteria	Actinobacteridae	Actinomycetales			Actinomycetales
447	Actinobacteria	Actinobacteria	Actinobacteridae	Actinomycetales			Actinomycetales
473	Actinobacteria	Actinobacteria	Actinobacteridae	Actinomycetales			Actinomycetales
581	Actinobacteria	Actinobacteria	Actinobacteridae	Actinomycetales			Actinomycetales
603	Actinobacteria	Actinobacteria	Actinobacteridae	Actinomycetales			Actinomycetales
894	Actinobacteria	Actinobacteria	Actinobacteridae	Actinomycetales			Actinomycetales
1007	Actinobacteria	Actinobacteria	Actinobacteridae	Actinomycetales			Actinomycetales
1013	Actinobacteria	Actinobacteria	Actinobacteridae	Actinomycetales			Actinomycetales
1185	Actinobacteria	Actinobacteria	Actinobacteridae	Actinomycetales			Actinomycetales
1373	Actinobacteria	Actinobacteria	Actinobacteridae	Actinomycetales			Actinomycetales
1519	Actinobacteria	Actinobacteria	Actinobacteridae	Actinomycetales			Actinomycetales
2159	Actinobacteria	Actinobacteria	Actinobacteridae	Actinomycetales			Actinomycetales
7	Actinobacteria	Actinobacteria	Actinobacteridae	Actinomycetales			Actinomycetales
23	Actinobacteria	Actinobacteria	Actinobacteridae	Actinomycetales			Actinomycetales
34	Actinobacteria	Actinobacteria	Actinobacteridae	Actinomycetales			Actinomycetales
97	Actinobacteria	Actinobacteria	Actinobacteridae	Actinomycetales			Actinomycetales
129	Actinobacteria	Actinobacteria	Actinobacteridae	Actinomycetales			Actinomycetales
148	Actinobacteria	Actinobacteria	Actinobacteridae	Actinomycetales			Actinomycetales
263	Actinobacteria	Actinobacteria	Actinobacteridae	Actinomycetales			Actinomycetales
316	Actinobacteria	Actinobacteria	Actinobacteridae	Actinomycetales			Actinomycetales
381	Actinobacteria	Actinobacteria	Actinobacteridae	Actinomycetales			Actinomycetales
548	Actinobacteria	Actinobacteria	Actinobacteridae	Actinomycetales			Actinomycetales
728	Actinobacteria	Actinobacteria	Actinobacteridae	Actinomycetales			Actinomycetales
1002	Actinobacteria	Actinobacteria	Actinobacteridae	Actinomycetales			Actinomycetales
1053	Actinobacteria	Actinobacteria	Actinobacteridae	Actinomycetales			Actinomycetales
1153	Actinobacteria	Actinobacteria	Actinobacteridae	Actinomycetales			Actinomycetales
1182	Actinobacteria	Actinobacteria	Actinobacteridae	Actinomycetales			Actinomycetales
1249	Actinobacteria	Actinobacteria	Actinobacteridae	Actinomycetales			Actinomycetales
1251	Actinobacteria	Actinobacteria	Actinobacteridae	Actinomycetales			Actinomycetales
1485	Actinobacteria	Actinobacteria	Actinobacteridae	Actinomycetales			Actinomycetales
1490	Actinobacteria	Actinobacteria	Actinobacteridae	Actinomycetales			Actinomycetales
1514	Actinobacteria	Actinobacteria	Actinobacteridae	Actinomycetales			Actinomycetales
1529	Actinobacteria	Actinobacteria	Actinobacteridae	Actinomycetales			Actinomycetales
1697	Actinobacteria	Actinobacteria	Actinobacteridae	Actinomycetales			Actinomycetales
1812	Actinobacteria	Actinobacteria	Actinobacteridae	Actinomycetales			Actinomycetales
1822	Actinobacteria	Actinobacteria	Actinobacteridae	Actinomycetales			Actinomycetales
1855	Actinobacteria	Actinobacteria	Actinobacteridae	Actinomycetales			Actinomycetales
2226	Actinobacteria	Actinobacteria	Actinobacteridae	Actinomycetales			Actinomycetales
2258	Actinobacteria	Actinobacteria	Actinobacteridae	Actinomycetales			Actinomycetales
2278	Actinobacteria	Actinobacteria	Actinobacteridae	Actinomycetales			Actinomycetales
2324	Actinobacteria	Actinobacteria	Actinobacteridae	Actinomycetales			Actinomycetales
2174	Actinobacteria	Actinobacteria	Actinobacteridae	Bifidobacteriales	Bifidobacteriaceae	Bifidobacterium	Bifidobacterium
1494	Actinobacteria	Actinobacteria	Actinobacteridae	Bifidobacteriales	Bifidobacteriaceae	Gardnerella	Gardnerella
1403	Actinobacteria	Actinobacteria	Actinobacteridae	Bifidobacteriales	Bifidobacteriaceae		Bifidobacteriaceae
1905	Actinobacteria	Actinobacteria	Actinobacteridae	Bifidobacteriales	Incertae sedis 10	Turicella	Turicella
363	Actinobacteria	Actinobacteria	Actinobacteridae				Actinobacteridae
213	Actinobacteria	Actinobacteria	Actinobacteridae				Actinobacteridae
1334	Actinobacteria	Actinobacteria	Actinobacteridae				Actinobacteridae
1159	Actinobacteria	Actinobacteria	Actinobacteridae				Actinobacteridae
911	Actinobacteria	Actinobacteria	Actinobacteridae				Actinobacteridae
2102	Actinobacteria	Actinobacteria	Actinobacteridae				Actinobacteridae
1430	Actinobacteria	Actinobacteria	Actinobacteridae				Actinobacteridae
904	Actinobacteria	Actinobacteria	Actinobacteridae				Actinobacteridae
70	Actinobacteria	Actinobacteria	Actinobacteridae				Actinobacteridae
852	Actinobacteria	Actinobacteria	Actinobacteridae				Actinobacteridae
903	Actinobacteria	Actinobacteria	Actinobacteridae				Actinobacteridae
1306	Actinobacteria	Actinobacteria	Actinobacteridae				Actinobacteridae
1364	Actinobacteria	Actinobacteria	Actinobacteridae				Actinobacteridae
1488	Actinobacteria	Actinobacteria	Actinobacteridae				Actinobacteridae
1889	Actinobacteria	Actinobacteria	Actinobacteridae				Actinobacteridae
58	Actinobacteria	Actinobacteria	Actinobacteridae				Actinobacteridae
1233	Actinobacteria	Actinobacteria	Actinobacteridae				Actinobacteridae
1678	Actinobacteria	Actinobacteria	Actinobacteridae				Actinobacteridae
2263	Actinobacteria	Actinobacteria	Actinobacteridae				Actinobacteridae
159	Actinobacteria	Actinobacteria	Actinobacteridae				Actinobacteridae
313	Actinobacteria	Actinobacteria	Actinobacteridae				Actinobacteridae
376	Actinobacteria	Actinobacteria	Actinobacteridae				Actinobacteridae
431	Actinobacteria	Actinobacteria	Actinobacteridae				Actinobacteridae
507	Actinobacteria	Actinobacteria	Actinobacteridae				Actinobacteridae
511	Actinobacteria	Actinobacteria	Actinobacteridae				Actinobacteridae
568	Actinobacteria	Actinobacteria	Actinobacteridae				Actinobacteridae
580	Actinobacteria	Actinobacteria	Actinobacteridae				Actinobacteridae
606	Actinobacteria	Actinobacteria	Actinobacteridae				Actinobacteridae
633	Actinobacteria	Actinobacteria	Actinobacteridae				Actinobacteridae
978	Actinobacteria	Actinobacteria	Actinobacteridae				Actinobacteridae
996	Actinobacteria	Actinobacteria	Actinobacteridae				Actinobacteridae
1132	Actinobacteria	Actinobacteria	Actinobacteridae				Actinobacteridae
1342	Actinobacteria	Actinobacteria	Actinobacteridae				Actinobacteridae
1448	Actinobacteria	Actinobacteria	Actinobacteridae				Actinobacteridae
1750	Actinobacteria	Actinobacteria	Actinobacteridae				Actinobacteridae
1942	Actinobacteria	Actinobacteria	Actinobacteridae				Actinobacteridae
2052	Actinobacteria	Actinobacteria	Actinobacteridae				Actinobacteridae
2131	Actinobacteria	Actinobacteria	Actinobacteridae				Actinobacteridae
2273	Actinobacteria	Actinobacteria	Actinobacteridae				Actinobacteridae
1418	Actinobacteria	Actinobacteria	Coriobacteridae	Coriobacteriales	Coriobacteriaceae		Coriobacteriaceae
578	Actinobacteria	Actinobacteria	Rubrobacteridae	Rubrobacterales	Rubrobacteraceae		Rubrobacteraceae
1151	Actinobacteria	Actinobacteria	Rubrobacteridae	Rubrobacterales	Rubrobacteraceae		Rubrobacteraceae
59	Actinobacteria	Actinobacteria					Actinobacteria
1973	Bacteroidetes	Bacteroidetes		Bacteroidales	Bacteroidaceae	Bacteroides	Bacteroides
1573	Bacteroidetes	Bacteroidetes		Bacteroidales	Porphyromonadaceae	Porphyromonas	Porphyromonas
2007	Bacteroidetes	Bacteroidetes		Bacteroidales	Porphyromonadaceae	Porphyromonas	Porphyromonas
1379	Bacteroidetes	Bacteroidetes		Bacteroidales	Porphyromonadaceae	Porphyromonas	Porphyromonas
1257	Bacteroidetes	Bacteroidetes		Bacteroidales	Porphyromonadaceae	Porphyromonas	Porphyromonas
1280	Bacteroidetes	Bacteroidetes		Bacteroidales	Porphyromonadaceae	Porphyromonas	Porphyromonas
2215	Bacteroidetes	Bacteroidetes		Bacteroidales	Porphyromonadaceae	Porphyromonas	Porphyromonas
131	Bacteroidetes	Bacteroidetes		Bacteroidales	Porphyromonadaceae	Porphyromonas	Porphyromonas
552	Bacteroidetes	Bacteroidetes		Bacteroidales	Porphyromonadaceae	Porphyromonas	Porphyromonas
757	Bacteroidetes	Bacteroidetes		Bacteroidales	Porphyromonadaceae	Porphyromonas	Porphyromonas
843	Bacteroidetes	Bacteroidetes		Bacteroidales	Porphyromonadaceae	Porphyromonas	Porphyromonas
1119	Bacteroidetes	Bacteroidetes		Bacteroidales	Porphyromonadaceae	Porphyromonas	Porphyromonas
83	Bacteroidetes	Bacteroidetes		Bacteroidales	Porphyromonadaceae	Porphyromonas	Porphyromonas
266	Bacteroidetes	Bacteroidetes		Bacteroidales	Porphyromonadaceae	Porphyromonas	Porphyromonas
1115	Bacteroidetes	Bacteroidetes		Bacteroidales	Porphyromonadaceae	Porphyromonas	Porphyromonas
1169	Bacteroidetes	Bacteroidetes		Bacteroidales	Porphyromonadaceae	Porphyromonas	Porphyromonas
1375	Bacteroidetes	Bacteroidetes		Bacteroidales	Porphyromonadaceae	Porphyromonas	Porphyromonas
1516	Bacteroidetes	Bacteroidetes		Bacteroidales	Porphyromonadaceae	Porphyromonas	Porphyromonas
1722	Bacteroidetes	Bacteroidetes		Bacteroidales	Porphyromonadaceae	Porphyromonas	Porphyromonas
1853	Bacteroidetes	Bacteroidetes		Bacteroidales	Porphyromonadaceae	Porphyromonas	Porphyromonas
2141	Bacteroidetes	Bacteroidetes		Bacteroidales	Porphyromonadaceae	Porphyromonas	Porphyromonas
707	Bacteroidetes	Bacteroidetes		Bacteroidales	Porphyromonadaceae		Porphyromonadaceae
463	Bacteroidetes	Bacteroidetes		Bacteroidales	Porphyromonadaceae		Porphyromonadaceae
1662	Bacteroidetes	Bacteroidetes		Bacteroidales	Porphyromonadaceae		Porphyromonadaceae
285	Bacteroidetes	Bacteroidetes		Bacteroidales	Porphyromonadaceae		Porphyromonadaceae
75	Bacteroidetes	Bacteroidetes		Bacteroidales	Porphyromonadaceae		Porphyromonadaceae
1799	Bacteroidetes	Bacteroidetes		Bacteroidales	Porphyromonadaceae		Porphyromonadaceae
1006	Bacteroidetes	Bacteroidetes		Bacteroidales	Porphyromonadaceae		Porphyromonadaceae
1654	Bacteroidetes	Bacteroidetes		Bacteroidales	Porphyromonadaceae		Porphyromonadaceae
2023	Bacteroidetes	Bacteroidetes		Bacteroidales	Porphyromonadaceae		Porphyromonadaceae
2203	Bacteroidetes	Bacteroidetes		Bacteroidales	Porphyromonadaceae		Porphyromonadaceae
1987	Bacteroidetes	Bacteroidetes		Bacteroidales	Prevotellaceae	Hallella	Hallella
1924	Bacteroidetes	Bacteroidetes		Bacteroidales	Prevotellaceae	Hallella	Hallella
47	Bacteroidetes	Bacteroidetes		Bacteroidales	Prevotellaceae	Prevotella	Prevotella
1805	Bacteroidetes	Bacteroidetes		Bacteroidales	Prevotellaceae	Prevotella	Prevotella
920	Bacteroidetes	Bacteroidetes		Bacteroidales	Prevotellaceae	Prevotella	Prevotella
524	Bacteroidetes	Bacteroidetes		Bacteroidales	Prevotellaceae	Prevotella	Prevotella
231	Bacteroidetes	Bacteroidetes		Bacteroidales	Prevotellaceae	Prevotella	Prevotella
621	Bacteroidetes	Bacteroidetes		Bacteroidales	Prevotellaceae	Prevotella	Prevotella
201	Bacteroidetes	Bacteroidetes		Bacteroidales	Prevotellaceae	Prevotella	Prevotella
0	Bacteroidetes	Bacteroidetes		Bacteroidales	Prevotellaceae	Prevotella	Prevotella
355	Bacteroidetes	Bacteroidetes		Bacteroidales	Prevotellaceae	Prevotella	Prevotella
410	Bacteroidetes	Bacteroidetes		Bacteroidales	Prevotellaceae	Prevotella	Prevotella
760	Bacteroidetes	Bacteroidetes		Bacteroidales	Prevotellaceae	Prevotella	Prevotella
1740	Bacteroidetes	Bacteroidetes		Bacteroidales	Prevotellaceae	Prevotella	Prevotella
1992	Bacteroidetes	Bacteroidetes		Bacteroidales	Prevotellaceae	Prevotella	Prevotella
2314	Bacteroidetes	Bacteroidetes		Bacteroidales	Prevotellaceae	Prevotella	Prevotella
2344	Bacteroidetes	Bacteroidetes		Bacteroidales	Prevotellaceae		Prevotellaceae
396	Bacteroidetes	Bacteroidetes		Bacteroidales	Prevotellaceae		Prevotellaceae
1034	Bacteroidetes	Bacteroidetes		Bacteroidales	Prevotellaceae		Prevotellaceae
2134	Bacteroidetes	Bacteroidetes		Bacteroidales	Prevotellaceae		Prevotellaceae
161	Bacteroidetes	Bacteroidetes		Bacteroidales	Prevotellaceae		Prevotellaceae
388	Bacteroidetes	Bacteroidetes		Bacteroidales	Prevotellaceae		Prevotellaceae
460	Bacteroidetes	Bacteroidetes		Bacteroidales	Prevotellaceae		Prevotellaceae
706	Bacteroidetes	Bacteroidetes		Bacteroidales	Prevotellaceae		Prevotellaceae
820	Bacteroidetes	Bacteroidetes		Bacteroidales	Prevotellaceae		Prevotellaceae
294	Bacteroidetes	Bacteroidetes		Bacteroidales			Bacteroidales
823	Bacteroidetes	Bacteroidetes		Bacteroidales			Bacteroidales
1050	Bacteroidetes	Bacteroidetes		Bacteroidales			Bacteroidales
1199	Bacteroidetes	Bacteroidetes		Bacteroidales			Bacteroidales
1446	Bacteroidetes	Bacteroidetes		Bacteroidales			Bacteroidales
2058	Bacteroidetes	Bacteroidetes		Bacteroidales			Bacteroidales
1310	Bacteroidetes	Flavobacteria		Flavobacteriales	Flavobacteriaceae	Chryseobacterium	Chryseobacterium
74	Bacteroidetes	Flavobacteria		Flavobacteriales	Flavobacteriaceae	Cloacibacterium	Cloacibacterium
1391	Bacteroidetes	Flavobacteria		Flavobacteriales	Flavobacteriaceae	Flavobacterium	Flavobacterium
1044	Bacteroidetes	Flavobacteria		Flavobacteriales	Flavobacteriaceae		Flavobacteriaceae
695	Bacteroidetes	Flavobacteria		Flavobacteriales	Flavobacteriaceae		Flavobacteriaceae
1232	Bacteroidetes	Flavobacteria		Flavobacteriales	Flavobacteriaceae		Flavobacteriaceae
276	Bacteroidetes	Sphingobacteria		Sphingobacteriales	Crenotrichaceae	Terrimonas	Terrimonas
1432	Bacteroidetes	Sphingobacteria		Sphingobacteriales	Crenotrichaceae		Crenotrichaceae
1816	Bacteroidetes	Sphingobacteria		Sphingobacteriales	Flexibacteraceae	Spirosoma	Spirosoma
1203	Bacteroidetes	Sphingobacteria		Sphingobacteriales	Flexibacteraceae	Spirosoma	Spirosoma
317	Bacteroidetes	Sphingobacteria		Sphingobacteriales	Sphingobacteriaceae	Pedobacter	Pedobacter
354	Bacteroidetes	Sphingobacteria		Sphingobacteriales	Sphingobacteriaceae	Sphingobacterium	Sphingobacterium
428	Bacteroidetes	Sphingobacteria		Sphingobacteriales	Sphingobacteriaceae	Sphingobacterium	Sphingobacterium
1092	Bacteroidetes	Sphingobacteria		Sphingobacteriales	Sphingobacteriaceae	Sphingobacterium	Sphingobacterium
1502	Bacteroidetes	Sphingobacteria		Sphingobacteriales			Sphingobacteriales
1083	Bacteroidetes						Bacteroidetes
571	Bacteroidetes						Bacteroidetes
556	Bacteroidetes						Bacteroidetes
1542	Bacteroidetes						Bacteroidetes
1254	Bacteroidetes						Bacteroidetes
1447	Bacteroidetes						Bacteroidetes
2353	Bacteroidetes						Bacteroidetes
1314	Bacteroidetes						Bacteroidetes
2013	Bacteroidetes						Bacteroidetes
1648	Bacteroidetes						Bacteroidetes
1329	Bacteroidetes						Bacteroidetes
1436	Bacteroidetes						Bacteroidetes
20	Bacteroidetes						Bacteroidetes
207	Bacteroidetes						Bacteroidetes
652	Bacteroidetes						Bacteroidetes
679	Bacteroidetes						Bacteroidetes
1100	Bacteroidetes						Bacteroidetes
1639	Bacteroidetes						Bacteroidetes
1645	Bacteroidetes						Bacteroidetes
14	Bacteroidetes						Bacteroidetes
348	Bacteroidetes						Bacteroidetes
353	Bacteroidetes						Bacteroidetes
498	Bacteroidetes						Bacteroidetes
697	Bacteroidetes						Bacteroidetes
715	Bacteroidetes						Bacteroidetes
731	Bacteroidetes						Bacteroidetes
825	Bacteroidetes						Bacteroidetes
857	Bacteroidetes						Bacteroidetes
1506	Bacteroidetes						Bacteroidetes
1673	Bacteroidetes						Bacteroidetes
1705	Bacteroidetes						Bacteroidetes
1772	Bacteroidetes						Bacteroidetes
1827	Bacteroidetes						Bacteroidetes
2280	Bacteroidetes						Bacteroidetes
258	Chlamydiae	Chlamydiae		Chlamydiales	Parachlamydiaceae	Neochlamydia	Neochlamydia
638	Cyanobacteria	Cyanobacteria		Chloroplast			Chloroplast
1462	Cyanobacteria	Cyanobacteria		Chloroplast			Chloroplast
821	Cyanobacteria	Cyanobacteria		Chloroplast			Chloroplast
380	Cyanobacteria	Cyanobacteria		Chloroplast			Chloroplast
1037	Cyanobacteria	Cyanobacteria		Chloroplast			Chloroplast
1525	Cyanobacteria	Cyanobacteria		Chloroplast			Chloroplast
2150	Cyanobacteria	Cyanobacteria		Chloroplast			Chloroplast
1309	Cyanobacteria	Cyanobacteria		Chloroplast			Chloroplast
1431	Cyanobacteria	Cyanobacteria		Family I	GpI		GpI
980	Deinococcus-Thermus	Deinococci		Deinococcales	Deinococcaceae	Deinococcus	Deinococcus
1919	Deinococcus-Thermus	Deinococci		Deinococcales	Deinococcaceae	Deinococcus	Deinococcus
489	Firmicutes	Bacilli		Bacillales	Bacillaceae	Bacillus	Bacillus
203	Firmicutes	Bacilli		Bacillales	Bacillaceae		Bacillaceae
1682	Firmicutes	Bacilli		Bacillales	Bacillaceae		Bacillaceae
2126	Firmicutes	Bacilli		Bacillales	Bacillaceae		Bacillaceae
2127	Firmicutes	Bacilli		Bacillales	Bacillaceae		Bacillaceae
1460	Firmicutes	Bacilli		Bacillales	Bacillaceae		Bacillaceae
1824	Firmicutes	Bacilli		Bacillales	Incertae Sedis XI	Gemella	Gemella
1794	Firmicutes	Bacilli		Bacillales	Paenibacillaceae		Paenibacillaceae
738	Firmicutes	Bacilli		Bacillales	Staphylococcaceae	Staphylococcus	Staphylococcus
1123	Firmicutes	Bacilli		Bacillales	Staphylococcaceae	Staphylococcus	Staphylococcus
2322	Firmicutes	Bacilli		Bacillales	Staphylococcaceae	Staphylococcus	Staphylococcus
575	Firmicutes	Bacilli		Bacillales	Staphylococcaceae	Staphylococcus	Staphylococcus
1086	Firmicutes	Bacilli		Bacillales	Staphylococcaceae	Staphylococcus	Staphylococcus
1397	Firmicutes	Bacilli		Bacillales	Staphylococcaceae	Staphylococcus	Staphylococcus
729	Firmicutes	Bacilli		Bacillales	Staphylococcaceae	Staphylococcus	Staphylococcus
1769	Firmicutes	Bacilli		Bacillales	Staphylococcaceae	Staphylococcus	Staphylococcus
2362	Firmicutes	Bacilli		Bacillales	Staphylococcaceae	Staphylococcus	Staphylococcus
152	Firmicutes	Bacilli		Bacillales	Staphylococcaceae	Staphylococcus	Staphylococcus
412	Firmicutes	Bacilli		Bacillales	Staphylococcaceae	Staphylococcus	Staphylococcus
590	Firmicutes	Bacilli		Bacillales	Staphylococcaceae	Staphylococcus	Staphylococcus
909	Firmicutes	Bacilli		Bacillales	Staphylococcaceae	Staphylococcus	Staphylococcus
1338	Firmicutes	Bacilli		Bacillales	Staphylococcaceae	Staphylococcus	Staphylococcus
2237	Firmicutes	Bacilli		Bacillales	Staphylococcaceae		Staphylococcaceae
2228	Firmicutes	Bacilli		Bacillales	Staphylococcaceae		Staphylococcaceae
1586	Firmicutes	Bacilli		Bacillales	Staphylococcaceae		Staphylococcaceae
420	Firmicutes	Bacilli		Bacillales	Staphylococcaceae		Staphylococcaceae
1536	Firmicutes	Bacilli		Bacillales	Staphylococcaceae		Staphylococcaceae
1633	Firmicutes	Bacilli		Bacillales	Staphylococcaceae		Staphylococcaceae
208	Firmicutes	Bacilli		Bacillales	Staphylococcaceae		Staphylococcaceae
620	Firmicutes	Bacilli		Bacillales	Staphylococcaceae		Staphylococcaceae
1327	Firmicutes	Bacilli		Bacillales	Staphylococcaceae		Staphylococcaceae
2256	Firmicutes	Bacilli		Bacillales	Staphylococcaceae		Staphylococcaceae
965	Firmicutes	Bacilli		Bacillales	Thermoactinomycetaceae	Thermoactinomyces	Thermoactinomyces
30	Firmicutes	Bacilli		Bacillales			Bacillales
449	Firmicutes	Bacilli		Bacillales			Bacillales
613	Firmicutes	Bacilli		Bacillales			Bacillales
2248	Firmicutes	Bacilli		Bacillales			Bacillales
1668	Firmicutes	Bacilli		Bacillales			Bacillales
1757	Firmicutes	Bacilli		Bacillales			Bacillales
1346	Firmicutes	Bacilli		Bacillales			Bacillales
1386	Firmicutes	Bacilli		Bacillales			Bacillales
2249	Firmicutes	Bacilli		Bacillales			Bacillales
121	Firmicutes	Bacilli		Bacillales			Bacillales
149	Firmicutes	Bacilli		Bacillales			Bacillales
379	Firmicutes	Bacilli		Bacillales			Bacillales
451	Firmicutes	Bacilli		Bacillales			Bacillales
494	Firmicutes	Bacilli		Bacillales			Bacillales
762	Firmicutes	Bacilli		Bacillales			Bacillales
1576	Firmicutes	Bacilli		Bacillales			Bacillales
602	Firmicutes	Bacilli		Bacillales			Bacillales
685	Firmicutes	Bacilli		Bacillales			Bacillales
860	Firmicutes	Bacilli		Bacillales			Bacillales
1416	Firmicutes	Bacilli		Bacillales			Bacillales
1846	Firmicutes	Bacilli		Lactobacillales	Aerococcaceae	Abiotrophia	Abiotrophia
2149	Firmicutes	Bacilli		Lactobacillales	Aerococcaceae	Aerococcus	Aerococcus
563	Firmicutes	Bacilli		Lactobacillales	Aerococcaceae	Ignavigranum	Ignavigranum
1906	Firmicutes	Bacilli		Lactobacillales	Aerococcaceae		Aerococcaceae
663	Firmicutes	Bacilli		Lactobacillales	Aerococcaceae		Aerococcaceae
1154	Firmicutes	Bacilli		Lactobacillales	Aerococcaceae		Aerococcaceae
2262	Firmicutes	Bacilli		Lactobacillales	Aerococcaceae		Aerococcaceae
141	Firmicutes	Bacilli		Lactobacillales	Aerococcaceae		Aerococcaceae
238	Firmicutes	Bacilli		Lactobacillales	Aerococcaceae		Aerococcaceae
1026	Firmicutes	Bacilli		Lactobacillales	Aerococcaceae		Aerococcaceae
1230	Firmicutes	Bacilli		Lactobacillales	Aerococcaceae		Aerococcaceae
1239	Firmicutes	Bacilli		Lactobacillales	Aerococcaceae		Aerococcaceae
1263	Firmicutes	Bacilli		Lactobacillales	Aerococcaceae		Aerococcaceae
1293	Firmicutes	Bacilli		Lactobacillales	Aerococcaceae		Aerococcaceae
1742	Firmicutes	Bacilli		Lactobacillales	Aerococcaceae		Aerococcaceae
2182	Firmicutes	Bacilli		Lactobacillales	Aerococcaceae		Aerococcaceae
2364	Firmicutes	Bacilli		Lactobacillales	Aerococcaceae		Aerococcaceae
268	Firmicutes	Bacilli		Lactobacillales	Carnobacteriaceae	Dolosigranulum	Dolosigranulum
325	Firmicutes	Bacilli		Lactobacillales	Carnobacteriaceae	Dolosigranulum	Dolosigranulum
1632	Firmicutes	Bacilli		Lactobacillales	Carnobacteriaceae	Isobaculum	Isobaculum
649	Firmicutes	Bacilli		Lactobacillales	Carnobacteriaceae		Carnobacteriaceae
554	Firmicutes	Bacilli		Lactobacillales	Carnobacteriaceae	Granulicatella	Granulicatella
8	Firmicutes	Bacilli		Lactobacillales	Carnobacteriaceae		Carnobacteriaceae
1152	Firmicutes	Bacilli		Lactobacillales	Carnobacteriaceae		Carnobacteriaceae
1472	Firmicutes	Bacilli		Lactobacillales	Carnobacteriaceae		Carnobacteriaceae
2181	Firmicutes	Bacilli		Lactobacillales	Lactobacillaceae	Lactobacillus	Lactobacillus
1302	Firmicutes	Bacilli		Lactobacillales	Lactobacillaceae		Lactobacillaceae
1196	Firmicutes	Bacilli		Lactobacillales	Leuconostocaceae	Leuconostoc	Leuconostoc
1000	Firmicutes	Bacilli		Lactobacillales	Leuconostocaceae	Weissella	Weissella
366	Firmicutes	Bacilli		Lactobacillales	Streptococcaceae	Lactococcus	Lactococcus
1259	Firmicutes	Bacilli		Lactobacillales	Streptococcaceae	Streptococcus	Streptococcus
1003	Firmicutes	Bacilli		Lactobacillales	Streptococcaceae	Streptococcus	Streptococcus
764	Firmicutes	Bacilli		Lactobacillales	Streptococcaceae	Streptococcus	Streptococcus
2155	Firmicutes	Bacilli		Lactobacillales	Streptococcaceae	Streptococcus	Streptococcus
2274	Firmicutes	Bacilli		Lactobacillales	Streptococcaceae	Streptococcus	Streptococcus
2297	Firmicutes	Bacilli		Lactobacillales	Streptococcaceae	Streptococcus	Streptococcus
1286	Firmicutes	Bacilli		Lactobacillales			Lactobacillales
2335	Firmicutes	Bacilli		Lactobacillales			Lactobacillales
892	Firmicutes	Bacilli		Lactobacillales			Lactobacillales
101	Firmicutes	Bacilli		Lactobacillales			Lactobacillales
42	Firmicutes	Bacilli		Lactobacillales			Lactobacillales
66	Firmicutes	Bacilli		Lactobacillales			Lactobacillales
166	Firmicutes	Bacilli		Lactobacillales			Lactobacillales
791	Firmicutes	Bacilli		Lactobacillales			Lactobacillales
886	Firmicutes	Bacilli		Lactobacillales			Lactobacillales
1828	Firmicutes	Bacilli		Lactobacillales			Lactobacillales
1886	Firmicutes	Bacilli		Lactobacillales			Lactobacillales
2039	Firmicutes	Bacilli		Lactobacillales			Lactobacillales
2276	Firmicutes	Bacilli		Lactobacillales			Lactobacillales
1400	Firmicutes	Bacilli					Bacilli
1912	Firmicutes	Bacilli					Bacilli
1144	Firmicutes	Bacilli					Bacilli
2008	Firmicutes	Bacilli					Bacilli
422	Firmicutes	Bacilli					Bacilli
519	Firmicutes	Bacilli					Bacilli
716	Firmicutes	Bacilli					Bacilli
1481	Firmicutes	Bacilli					Bacilli
2078	Firmicutes	Bacilli					Bacilli
29	Firmicutes	Bacilli					Bacilli
198	Firmicutes	Bacilli					Bacilli
492	Firmicutes	Bacilli					Bacilli
1009	Firmicutes	Bacilli					Bacilli
1222	Firmicutes	Bacilli					Bacilli
2060	Firmicutes	Bacilli					Bacilli
2218	Firmicutes	Bacilli					Bacilli
346	Firmicutes	Bacilli					Bacilli
482	Firmicutes	Bacilli					Bacilli
546	Firmicutes	Bacilli					Bacilli
719	Firmicutes	Bacilli					Bacilli
793	Firmicutes	Bacilli					Bacilli
1078	Firmicutes	Bacilli					Bacilli
1128	Firmicutes	Bacilli					Bacilli
1625	Firmicutes	Bacilli					Bacilli
1725	Firmicutes	Bacilli					Bacilli
1913	Firmicutes	Bacilli					Bacilli
2075	Firmicutes	Bacilli					Bacilli
2120	Firmicutes	Bacilli					Bacilli
2168	Firmicutes	Bacilli					Bacilli
2188	Firmicutes	Bacilli					Bacilli
2304	Firmicutes	Bacilli					Bacilli
924	Firmicutes	Clostridia		Clostridiales	Anaerococcus		Anaerococcus
1702	Firmicutes	Clostridia		Clostridiales	Anaerococcus		Anaerococcus
169	Firmicutes	Clostridia		Clostridiales	Anaerococcus		Anaerococcus
1704	Firmicutes	Clostridia		Clostridiales	Anaerococcus		Anaerococcus
2194	Firmicutes	Clostridia		Clostridiales	Anaerococcus		Anaerococcus
529	Firmicutes	Clostridia		Clostridiales	Anaerococcus		Anaerococcus
771	Firmicutes	Clostridia		Clostridiales	Anaerococcus		Anaerococcus
212	Firmicutes	Clostridia		Clostridiales	Anaerococcus		Anaerococcus
1258	Firmicutes	Clostridia		Clostridiales	Anaerococcus		Anaerococcus
1271	Firmicutes	Clostridia		Clostridiales	Anaerococcus		Anaerococcus
1020	Firmicutes	Clostridia		Clostridiales	Anaerococcus		Anaerococcus
1459	Firmicutes	Clostridia		Clostridiales	Anaerococcus		Anaerococcus
493	Firmicutes	Clostridia		Clostridiales	Anaerococcus		Anaerococcus
941	Firmicutes	Clostridia		Clostridiales	Anaerococcus		Anaerococcus
2326	Firmicutes	Clostridia		Clostridiales	Anaerococcus		Anaerococcus
656	Firmicutes	Clostridia		Clostridiales	Anaerococcus		Anaerococcus
1414	Firmicutes	Clostridia		Clostridiales	Anaerococcus		Anaerococcus
683	Firmicutes	Clostridia		Clostridiales	Anaerococcus		Anaerococcus
986	Firmicutes	Clostridia		Clostridiales	Anaerococcus		Anaerococcus
789	Firmicutes	Clostridia		Clostridiales	Anaerococcus		Anaerococcus
847	Firmicutes	Clostridia		Clostridiales	Anaerococcus		Anaerococcus
1099	Firmicutes	Clostridia		Clostridiales	Anaerococcus		Anaerococcus
1920	Firmicutes	Clostridia		Clostridiales	Anaerococcus		Anaerococcus
2213	Firmicutes	Clostridia		Clostridiales	Anaerococcus		Anaerococcus
334	Firmicutes	Clostridia		Clostridiales	Anaerococcus		Anaerococcus
438	Firmicutes	Clostridia		Clostridiales	Anaerococcus		Anaerococcus
971	Firmicutes	Clostridia		Clostridiales	Anaerococcus		Anaerococcus
1091	Firmicutes	Clostridia		Clostridiales	Anaerococcus		Anaerococcus
1510	Firmicutes	Clostridia		Clostridiales	Anaerococcus		Anaerococcus
1714	Firmicutes	Clostridia		Clostridiales	Anaerococcus		Anaerococcus
2140	Firmicutes	Clostridia		Clostridiales	Anaerococcus		Anaerococcus
2242	Firmicutes	Clostridia		Clostridiales	Anaerococcus		Anaerococcus
273	Firmicutes	Clostridia		Clostridiales	Anaerococcus		Anaerococcus
398	Firmicutes	Clostridia		Clostridiales	Anaerococcus		Anaerococcus
499	Firmicutes	Clostridia		Clostridiales	Anaerococcus		Anaerococcus
752	Firmicutes	Clostridia		Clostridiales	Anaerococcus		Anaerococcus
766	Firmicutes	Clostridia		Clostridiales	Anaerococcus		Anaerococcus
1716	Firmicutes	Clostridia		Clostridiales	Anaerococcus		Anaerococcus
1885	Firmicutes	Clostridia		Clostridiales	Anaerococcus		Anaerococcus
168	Firmicutes	Clostridia		Clostridiales	Anaerococcus		Anaerococcus
181	Firmicutes	Clostridia		Clostridiales	Anaerococcus		Anaerococcus
205	Firmicutes	Clostridia		Clostridiales	Anaerococcus		Anaerococcus
239	Firmicutes	Clostridia		Clostridiales	Anaerococcus		Anaerococcus
251	Firmicutes	Clostridia		Clostridiales	Anaerococcus		Anaerococcus
1560	Firmicutes	Clostridia		Clostridiales	Anaerococcus		Anaerococcus
1683	Firmicutes	Clostridia		Clostridiales	Anaerococcus		Anaerococcus
2363	Firmicutes	Clostridia		Clostridiales	Anaerococcus		Anaerococcus
165	Firmicutes	Clostridia		Clostridiales	Anaerococcus		Anaerococcus
270	Firmicutes	Clostridia		Clostridiales	Anaerococcus		Anaerococcus
280	Firmicutes	Clostridia		Clostridiales	Anaerococcus		Anaerococcus
399	Firmicutes	Clostridia		Clostridiales	Anaerococcus		Anaerococcus
404	Firmicutes	Clostridia		Clostridiales	Anaerococcus		Anaerococcus
424	Firmicutes	Clostridia		Clostridiales	Anaerococcus		Anaerococcus
512	Firmicutes	Clostridia		Clostridiales	Anaerococcus		Anaerococcus
551	Firmicutes	Clostridia		Clostridiales	Anaerococcus		Anaerococcus
601	Firmicutes	Clostridia		Clostridiales	Anaerococcus		Anaerococcus
625	Firmicutes	Clostridia		Clostridiales	Anaerococcus		Anaerococcus
815	Firmicutes	Clostridia		Clostridiales	Anaerococcus		Anaerococcus
931	Firmicutes	Clostridia		Clostridiales	Anaerococcus		Anaerococcus
949	Firmicutes	Clostridia		Clostridiales	Anaerococcus		Anaerococcus
956	Firmicutes	Clostridia		Clostridiales	Anaerococcus		Anaerococcus
1094	Firmicutes	Clostridia		Clostridiales	Anaerococcus		Anaerococcus
1114	Firmicutes	Clostridia		Clostridiales	Anaerococcus		Anaerococcus
1253	Firmicutes	Clostridia		Clostridiales	Anaerococcus		Anaerococcus
1282	Firmicutes	Clostridia		Clostridiales	Anaerococcus		Anaerococcus
1316	Firmicutes	Clostridia		Clostridiales	Anaerococcus		Anaerococcus
1374	Firmicutes	Clostridia		Clostridiales	Anaerococcus		Anaerococcus
1410	Firmicutes	Clostridia		Clostridiales	Anaerococcus		Anaerococcus
1500	Firmicutes	Clostridia		Clostridiales	Anaerococcus		Anaerococcus
1535	Firmicutes	Clostridia		Clostridiales	Anaerococcus		Anaerococcus
1587	Firmicutes	Clostridia		Clostridiales	Anaerococcus		Anaerococcus
1609	Firmicutes	Clostridia		Clostridiales	Anaerococcus		Anaerococcus
1637	Firmicutes	Clostridia		Clostridiales	Anaerococcus		Anaerococcus
1664	Firmicutes	Clostridia		Clostridiales	Anaerococcus		Anaerococcus
1711	Firmicutes	Clostridia		Clostridiales	Anaerococcus		Anaerococcus
1764	Firmicutes	Clostridia		Clostridiales	Anaerococcus		Anaerococcus
1927	Firmicutes	Clostridia		Clostridiales	Anaerococcus		Anaerococcus
1930	Firmicutes	Clostridia		Clostridiales	Anaerococcus		Anaerococcus
2142	Firmicutes	Clostridia		Clostridiales	Anaerococcus		Anaerococcus
2180	Firmicutes	Clostridia		Clostridiales	Anaerococcus		Anaerococcus
2224	Firmicutes	Clostridia		Clostridiales	Anaerococcus		Anaerococcus
2349	Firmicutes	Clostridia		Clostridiales	Anaerococcus		Anaerococcus
36	Firmicutes	Clostridia		Clostridiales	Anaerococcus		Anaerococcus
53	Firmicutes	Clostridia		Clostridiales	Anaerococcus		Anaerococcus
54	Firmicutes	Clostridia		Clostridiales	Anaerococcus		Anaerococcus
61	Firmicutes	Clostridia		Clostridiales	Anaerococcus		Anaerococcus
82	Firmicutes	Clostridia		Clostridiales	Anaerococcus		Anaerococcus
147	Firmicutes	Clostridia		Clostridiales	Anaerococcus		Anaerococcus
153	Firmicutes	Clostridia		Clostridiales	Anaerococcus		Anaerococcus
157	Firmicutes	Clostridia		Clostridiales	Anaerococcus		Anaerococcus
158	Firmicutes	Clostridia		Clostridiales	Anaerococcus		Anaerococcus
160	Firmicutes	Clostridia		Clostridiales	Anaerococcus		Anaerococcus
164	Firmicutes	Clostridia		Clostridiales	Anaerococcus		Anaerococcus
179	Firmicutes	Clostridia		Clostridiales	Anaerococcus		Anaerococcus
254	Firmicutes	Clostridia		Clostridiales	Anaerococcus		Anaerococcus
282	Firmicutes	Clostridia		Clostridiales	Anaerococcus		Anaerococcus
289	Firmicutes	Clostridia		Clostridiales	Anaerococcus		Anaerococcus
295	Firmicutes	Clostridia		Clostridiales	Anaerococcus		Anaerococcus
296	Firmicutes	Clostridia		Clostridiales	Anaerococcus		Anaerococcus
304	Firmicutes	Clostridia		Clostridiales	Anaerococcus		Anaerococcus
315	Firmicutes	Clostridia		Clostridiales	Anaerococcus		Anaerococcus
337	Firmicutes	Clostridia		Clostridiales	Anaerococcus		Anaerococcus
374	Firmicutes	Clostridia		Clostridiales	Anaerococcus		Anaerococcus
419	Firmicutes	Clostridia		Clostridiales	Anaerococcus		Anaerococcus
434	Firmicutes	Clostridia		Clostridiales	Anaerococcus		Anaerococcus
472	Firmicutes	Clostridia		Clostridiales	Anaerococcus		Anaerococcus
523	Firmicutes	Clostridia		Clostridiales	Anaerococcus		Anaerococcus
526	Firmicutes	Clostridia		Clostridiales	Anaerococcus		Anaerococcus
555	Firmicutes	Clostridia		Clostridiales	Anaerococcus		Anaerococcus
589	Firmicutes	Clostridia		Clostridiales	Anaerococcus		Anaerococcus
622	Firmicutes	Clostridia		Clostridiales	Anaerococcus		Anaerococcus
642	Firmicutes	Clostridia		Clostridiales	Anaerococcus		Anaerococcus
717	Firmicutes	Clostridia		Clostridiales	Anaerococcus		Anaerococcus
734	Firmicutes	Clostridia		Clostridiales	Anaerococcus		Anaerococcus
739	Firmicutes	Clostridia		Clostridiales	Anaerococcus		Anaerococcus
744	Firmicutes	Clostridia		Clostridiales	Anaerococcus		Anaerococcus
745	Firmicutes	Clostridia		Clostridiales	Anaerococcus		Anaerococcus
750	Firmicutes	Clostridia		Clostridiales	Anaerococcus		Anaerococcus
759	Firmicutes	Clostridia		Clostridiales	Anaerococcus		Anaerococcus
786	Firmicutes	Clostridia		Clostridiales	Anaerococcus		Anaerococcus
816	Firmicutes	Clostridia		Clostridiales	Anaerococcus		Anaerococcus
876	Firmicutes	Clostridia		Clostridiales	Anaerococcus		Anaerococcus
895	Firmicutes	Clostridia		Clostridiales	Anaerococcus		Anaerococcus
910	Firmicutes	Clostridia		Clostridiales	Anaerococcus		Anaerococcus
930	Firmicutes	Clostridia		Clostridiales	Anaerococcus		Anaerococcus
959	Firmicutes	Clostridia		Clostridiales	Anaerococcus		Anaerococcus
981	Firmicutes	Clostridia		Clostridiales	Anaerococcus		Anaerococcus
983	Firmicutes	Clostridia		Clostridiales	Anaerococcus		Anaerococcus
1038	Firmicutes	Clostridia		Clostridiales	Anaerococcus		Anaerococcus
1041	Firmicutes	Clostridia		Clostridiales	Anaerococcus		Anaerococcus
1055	Firmicutes	Clostridia		Clostridiales	Anaerococcus		Anaerococcus
1063	Firmicutes	Clostridia		Clostridiales	Anaerococcus		Anaerococcus
1093	Firmicutes	Clostridia		Clostridiales	Anaerococcus		Anaerococcus
1136	Firmicutes	Clostridia		Clostridiales	Anaerococcus		Anaerococcus
1187	Firmicutes	Clostridia		Clostridiales	Anaerococcus		Anaerococcus
1318	Firmicutes	Clostridia		Clostridiales	Anaerococcus		Anaerococcus
1363	Firmicutes	Clostridia		Clostridiales	Anaerococcus		Anaerococcus
1365	Firmicutes	Clostridia		Clostridiales	Anaerococcus		Anaerococcus
1372	Firmicutes	Clostridia		Clostridiales	Anaerococcus		Anaerococcus
1392	Firmicutes	Clostridia		Clostridiales	Anaerococcus		Anaerococcus
1399	Firmicutes	Clostridia		Clostridiales	Anaerococcus		Anaerococcus
1411	Firmicutes	Clostridia		Clostridiales	Anaerococcus		Anaerococcus
1412	Firmicutes	Clostridia		Clostridiales	Anaerococcus		Anaerococcus
1435	Firmicutes	Clostridia		Clostridiales	Anaerococcus		Anaerococcus
1454	Firmicutes	Clostridia		Clostridiales	Anaerococcus		Anaerococcus
1464	Firmicutes	Clostridia		Clostridiales	Anaerococcus		Anaerococcus
1503	Firmicutes	Clostridia		Clostridiales	Anaerococcus		Anaerococcus
1504	Firmicutes	Clostridia		Clostridiales	Anaerococcus		Anaerococcus
1546	Firmicutes	Clostridia		Clostridiales	Anaerococcus		Anaerococcus
1556	Firmicutes	Clostridia		Clostridiales	Anaerococcus		Anaerococcus
1566	Firmicutes	Clostridia		Clostridiales	Anaerococcus		Anaerococcus
1577	Firmicutes	Clostridia		Clostridiales	Anaerococcus		Anaerococcus
1579	Firmicutes	Clostridia		Clostridiales	Anaerococcus		Anaerococcus
1601	Firmicutes	Clostridia		Clostridiales	Anaerococcus		Anaerococcus
1605	Firmicutes	Clostridia		Clostridiales	Anaerococcus		Anaerococcus
1606	Firmicutes	Clostridia		Clostridiales	Anaerococcus		Anaerococcus
1613	Firmicutes	Clostridia		Clostridiales	Anaerococcus		Anaerococcus
1617	Firmicutes	Clostridia		Clostridiales	Anaerococcus		Anaerococcus
1681	Firmicutes	Clostridia		Clostridiales	Anaerococcus		Anaerococcus
1723	Firmicutes	Clostridia		Clostridiales	Anaerococcus		Anaerococcus
1724	Firmicutes	Clostridia		Clostridiales	Anaerococcus		Anaerococcus
1736	Firmicutes	Clostridia		Clostridiales	Anaerococcus		Anaerococcus
1857	Firmicutes	Clostridia		Clostridiales	Anaerococcus		Anaerococcus
1869	Firmicutes	Clostridia		Clostridiales	Anaerococcus		Anaerococcus
1874	Firmicutes	Clostridia		Clostridiales	Anaerococcus		Anaerococcus
1955	Firmicutes	Clostridia		Clostridiales	Anaerococcus		Anaerococcus
1957	Firmicutes	Clostridia		Clostridiales	Anaerococcus		Anaerococcus
1975	Firmicutes	Clostridia		Clostridiales	Anaerococcus		Anaerococcus
1988	Firmicutes	Clostridia		Clostridiales	Anaerococcus		Anaerococcus
2000	Firmicutes	Clostridia		Clostridiales	Anaerococcus		Anaerococcus
2030	Firmicutes	Clostridia		Clostridiales	Anaerococcus		Anaerococcus
2068	Firmicutes	Clostridia		Clostridiales	Anaerococcus		Anaerococcus
2071	Firmicutes	Clostridia		Clostridiales	Anaerococcus		Anaerococcus
2087	Firmicutes	Clostridia		Clostridiales	Anaerococcus		Anaerococcus
2096	Firmicutes	Clostridia		Clostridiales	Anaerococcus		Anaerococcus
2253	Firmicutes	Clostridia		Clostridiales	Anaerococcus		Anaerococcus
2266	Firmicutes	Clostridia		Clostridiales	Anaerococcus		Anaerococcus
2334	Firmicutes	Clostridia		Clostridiales	Anaerococcus		Anaerococcus
2351	Firmicutes	Clostridia		Clostridiales	Anaerococcus		Anaerococcus
2356	Firmicutes	Clostridia		Clostridiales	Anaerococcus		Anaerococcus
2358	Firmicutes	Clostridia		Clostridiales	Anaerococcus		Anaerococcus
1284	Firmicutes	Clostridia		Clostridiales	Finegoldia		Finegoldia
378	Firmicutes	Clostridia		Clostridiales	Finegoldia		Finegoldia
1743	Firmicutes	Clostridia		Clostridiales	Finegoldia		Finegoldia
837	Firmicutes	Clostridia		Clostridiales	Finegoldia		Finegoldia
829	Firmicutes	Clostridia		Clostridiales	Finegoldia		Finegoldia
209	Firmicutes	Clostridia		Clostridiales	Finegoldia		Finegoldia
991	Firmicutes	Clostridia		Clostridiales	Finegoldia		Finegoldia
1171	Firmicutes	Clostridia		Clostridiales	Finegoldia		Finegoldia
2006	Firmicutes	Clostridia		Clostridiales	Finegoldia		Finegoldia
272	Firmicutes	Clostridia		Clostridiales	Finegoldia		Finegoldia
1064	Firmicutes	Clostridia		Clostridiales	Finegoldia		Finegoldia
1946	Firmicutes	Clostridia		Clostridiales	Finegoldia		Finegoldia
1977	Firmicutes	Clostridia		Clostridiales	Finegoldia		Finegoldia
92	Firmicutes	Clostridia		Clostridiales	Finegoldia		Finegoldia
202	Firmicutes	Clostridia		Clostridiales	Finegoldia		Finegoldia
243	Firmicutes	Clostridia		Clostridiales	Finegoldia		Finegoldia
314	Firmicutes	Clostridia		Clostridiales	Finegoldia		Finegoldia
371	Firmicutes	Clostridia		Clostridiales	Finegoldia		Finegoldia
469	Firmicutes	Clostridia		Clostridiales	Finegoldia		Finegoldia
509	Firmicutes	Clostridia		Clostridiales	Finegoldia		Finegoldia
539	Firmicutes	Clostridia		Clostridiales	Finegoldia		Finegoldia
627	Firmicutes	Clostridia		Clostridiales	Finegoldia		Finegoldia
704	Firmicutes	Clostridia		Clostridiales	Finegoldia		Finegoldia
748	Firmicutes	Clostridia		Clostridiales	Finegoldia		Finegoldia
872	Firmicutes	Clostridia		Clostridiales	Finegoldia		Finegoldia
1117	Firmicutes	Clostridia		Clostridiales	Finegoldia		Finegoldia
1189	Firmicutes	Clostridia		Clostridiales	Finegoldia		Finegoldia
1522	Firmicutes	Clostridia		Clostridiales	Finegoldia		Finegoldia
1555	Firmicutes	Clostridia		Clostridiales	Finegoldia		Finegoldia
2320	Firmicutes	Clostridia		Clostridiales	Finegoldia		Finegoldia
624	Firmicutes	Clostridia		Clostridiales	Gallicola		Gallicola
28	Firmicutes	Clostridia		Clostridiales	Gallicola		Gallicola
407	Firmicutes	Clostridia		Clostridiales	Gallicola		Gallicola
414	Firmicutes	Clostridia		Clostridiales	Helcococcus		Helcococcus
915	Firmicutes	Clostridia		Clostridiales	Parvimonas		Parvimonas
2173	Firmicutes	Clostridia		Clostridiales	Peptoniphilus		Peptoniphilus
804	Firmicutes	Clostridia		Clostridiales	Peptoniphilus		Peptoniphilus
200	Firmicutes	Clostridia		Clostridiales	Peptoniphilus		Peptoniphilus
711	Firmicutes	Clostridia		Clostridiales	Peptoniphilus		Peptoniphilus
1580	Firmicutes	Clostridia		Clostridiales	Peptoniphilus		Peptoniphilus
1775	Firmicutes	Clostridia		Clostridiales	Peptoniphilus		Peptoniphilus
1803	Firmicutes	Clostridia		Clostridiales	Peptoniphilus		Peptoniphilus
1928	Firmicutes	Clostridia		Clostridiales	Peptoniphilus		Peptoniphilus
773	Firmicutes	Clostridia		Clostridiales	Peptoniphilus		Peptoniphilus
1108	Firmicutes	Clostridia		Clostridiales	Peptoniphilus		Peptoniphilus
1469	Firmicutes	Clostridia		Clostridiales	Peptoniphilus		Peptoniphilus
1779	Firmicutes	Clostridia		Clostridiales	Peptoniphilus		Peptoniphilus
352	Firmicutes	Clostridia		Clostridiales	Peptoniphilus		Peptoniphilus
1677	Firmicutes	Clostridia		Clostridiales	Peptoniphilus		Peptoniphilus
831	Firmicutes	Clostridia		Clostridiales	Peptoniphilus		Peptoniphilus
1313	Firmicutes	Clostridia		Clostridiales	Peptoniphilus		Peptoniphilus
1457	Firmicutes	Clostridia		Clostridiales	Peptoniphilus		Peptoniphilus
1496	Firmicutes	Clostridia		Clostridiales	Peptoniphilus		Peptoniphilus
1517	Firmicutes	Clostridia		Clostridiales	Peptoniphilus		Peptoniphilus
1538	Firmicutes	Clostridia		Clostridiales	Peptoniphilus		Peptoniphilus
570	Firmicutes	Clostridia		Clostridiales	Peptoniphilus		Peptoniphilus
687	Firmicutes	Clostridia		Clostridiales	Peptoniphilus		Peptoniphilus
937	Firmicutes	Clostridia		Clostridiales	Peptoniphilus		Peptoniphilus
1014	Firmicutes	Clostridia		Clostridiales	Peptoniphilus		Peptoniphilus
1039	Firmicutes	Clostridia		Clostridiales	Peptoniphilus		Peptoniphilus
1112	Firmicutes	Clostridia		Clostridiales	Peptoniphilus		Peptoniphilus
1147	Firmicutes	Clostridia		Clostridiales	Peptoniphilus		Peptoniphilus
1290	Firmicutes	Clostridia		Clostridiales	Peptoniphilus		Peptoniphilus
1672	Firmicutes	Clostridia		Clostridiales	Peptoniphilus		Peptoniphilus
1916	Firmicutes	Clostridia		Clostridiales	Peptoniphilus		Peptoniphilus
2170	Firmicutes	Clostridia		Clostridiales	Peptoniphilus		Peptoniphilus
2285	Firmicutes	Clostridia		Clostridiales	Peptoniphilus		Peptoniphilus
85	Firmicutes	Clostridia		Clostridiales	Peptoniphilus		Peptoniphilus
106	Firmicutes	Clostridia		Clostridiales	Peptoniphilus		Peptoniphilus
108	Firmicutes	Clostridia		Clostridiales	Peptoniphilus		Peptoniphilus
156	Firmicutes	Clostridia		Clostridiales	Peptoniphilus		Peptoniphilus
377	Firmicutes	Clostridia		Clostridiales	Peptoniphilus		Peptoniphilus
406	Firmicutes	Clostridia		Clostridiales	Peptoniphilus		Peptoniphilus
443	Firmicutes	Clostridia		Clostridiales	Peptoniphilus		Peptoniphilus
455	Firmicutes	Clostridia		Clostridiales	Peptoniphilus		Peptoniphilus
456	Firmicutes	Clostridia		Clostridiales	Peptoniphilus		Peptoniphilus
465	Firmicutes	Clostridia		Clostridiales	Peptoniphilus		Peptoniphilus
584	Firmicutes	Clostridia		Clostridiales	Peptoniphilus		Peptoniphilus
637	Firmicutes	Clostridia		Clostridiales	Peptoniphilus		Peptoniphilus
863	Firmicutes	Clostridia		Clostridiales	Peptoniphilus		Peptoniphilus
917	Firmicutes	Clostridia		Clostridiales	Peptoniphilus		Peptoniphilus
1029	Firmicutes	Clostridia		Clostridiales	Peptoniphilus		Peptoniphilus
1315	Firmicutes	Clostridia		Clostridiales	Peptoniphilus		Peptoniphilus
1404	Firmicutes	Clostridia		Clostridiales	Peptoniphilus		Peptoniphilus
1476	Firmicutes	Clostridia		Clostridiales	Peptoniphilus		Peptoniphilus
1497	Firmicutes	Clostridia		Clostridiales	Peptoniphilus		Peptoniphilus
1611	Firmicutes	Clostridia		Clostridiales	Peptoniphilus		Peptoniphilus
1615	Firmicutes	Clostridia		Clostridiales	Peptoniphilus		Peptoniphilus
1698	Firmicutes	Clostridia		Clostridiales	Peptoniphilus		Peptoniphilus
1810	Firmicutes	Clostridia		Clostridiales	Peptoniphilus		Peptoniphilus
1836	Firmicutes	Clostridia		Clostridiales	Peptoniphilus		Peptoniphilus
1873	Firmicutes	Clostridia		Clostridiales	Peptoniphilus		Peptoniphilus
1964	Firmicutes	Clostridia		Clostridiales	Peptoniphilus		Peptoniphilus
2072	Firmicutes	Clostridia		Clostridiales	Peptoniphilus		Peptoniphilus
2162	Firmicutes	Clostridia		Clostridiales	Peptoniphilus		Peptoniphilus
2264	Firmicutes	Clostridia		Clostridiales	Peptoniphilus		Peptoniphilus
1610	Firmicutes	Clostridia		Clostridiales			Clostridiales
2347	Firmicutes	Clostridia		Clostridiales			Clostridiales
944	Firmicutes	Clostridia		Clostridiales			Clostridiales
1509	Firmicutes	Clostridia		Clostridiales			Clostridiales
1333	Firmicutes	Clostridia		Clostridiales			Clostridiales
678	Firmicutes	Clostridia		Clostridiales			Clostridiales
2287	Firmicutes	Clostridia		Clostridiales			Clostridiales
2043	Firmicutes	Clostridia		Clostridiales			Clostridiales
2146	Firmicutes	Clostridia		Clostridiales			Clostridiales
88	Firmicutes	Clostridia		Clostridiales			Clostridiales
216	Firmicutes	Clostridia		Clostridiales			Clostridiales
223	Firmicutes	Clostridia		Clostridiales			Clostridiales
553	Firmicutes	Clostridia		Clostridiales			Clostridiales
784	Firmicutes	Clostridia		Clostridiales			Clostridiales
1001	Firmicutes	Clostridia		Clostridiales			Clostridiales
1070	Firmicutes	Clostridia		Clostridiales			Clostridiales
1138	Firmicutes	Clostridia		Clostridiales			Clostridiales
1143	Firmicutes	Clostridia		Clostridiales			Clostridiales
1155	Firmicutes	Clostridia		Clostridiales			Clostridiales
1237	Firmicutes	Clostridia		Clostridiales			Clostridiales
1274	Firmicutes	Clostridia		Clostridiales			Clostridiales
1277	Firmicutes	Clostridia		Clostridiales			Clostridiales
1589	Firmicutes	Clostridia		Clostridiales			Clostridiales
1818	Firmicutes	Clostridia		Clostridiales			Clostridiales
1882	Firmicutes	Clostridia		Clostridiales			Clostridiales
1976	Firmicutes	Clostridia		Clostridiales			Clostridiales
2254	Firmicutes	Clostridia		Clostridiales			Clostridiales
2352	Firmicutes	Clostridia		Clostridiales			Clostridiales
440	Firmicutes	Clostridia		Clostridiales			Clostridiales
2323	Firmicutes	Clostridia		Clostridiales	Lachnospiraceae	Anaerostipes	Anaerostipes
116	Firmicutes	Clostridia		Clostridiales	Lachnospiraceae	Moryella	Moryella
1791	Firmicutes	Clostridia		Clostridiales	Lachnospiraceae		Lachnospiraceae
1056	Firmicutes	Clostridia		Clostridiales	Lachnospiraceae		Lachnospiraceae
2201	Firmicutes	Clostridia		Clostridiales	Lachnospiraceae		Lachnospiraceae
1473	Firmicutes	Clostridia		Clostridiales	Lachnospiraceae		Lachnospiraceae
1901	Firmicutes	Clostridia		Clostridiales	Lachnospiraceae		Lachnospiraceae
2289	Firmicutes	Clostridia		Clostridiales	Lachnospiraceae		Lachnospiraceae
467	Firmicutes	Clostridia		Clostridiales	Peptococcaceae	Peptococcus	Peptococcus
1127	Firmicutes	Clostridia		Clostridiales	Peptococcaceae	Peptococcus	Peptococcus
1774	Firmicutes	Clostridia		Clostridiales	Peptococcaceae	Peptococcus	Peptococcus
1841	Firmicutes	Clostridia		Clostridiales	Peptococcaceae	Peptococcus	Peptococcus
2059	Firmicutes	Clostridia		Clostridiales	Peptococcaceae	Peptococcus	Peptococcus
126	Firmicutes	Clostridia		Clostridiales	Peptococcaceae	Peptococcus	Peptococcus
421	Firmicutes	Clostridia		Clostridiales	Peptococcaceae	Peptococcus	Peptococcus
510	Firmicutes	Clostridia		Clostridiales	Peptococcaceae	Peptococcus	Peptococcus
576	Firmicutes	Clostridia		Clostridiales	Peptococcaceae	Peptococcus	Peptococcus
604	Firmicutes	Clostridia		Clostridiales	Peptococcaceae	Peptococcus	Peptococcus
651	Firmicutes	Clostridia		Clostridiales	Peptococcaceae	Peptococcus	Peptococcus
705	Firmicutes	Clostridia		Clostridiales	Peptococcaceae	Peptococcus	Peptococcus
802	Firmicutes	Clostridia		Clostridiales	Peptococcaceae	Peptococcus	Peptococcus
849	Firmicutes	Clostridia		Clostridiales	Peptococcaceae	Peptococcus	Peptococcus
1600	Firmicutes	Clostridia		Clostridiales	Peptococcaceae	Peptococcus	Peptococcus
1762	Firmicutes	Clostridia		Clostridiales	Peptococcaceae	Peptococcus	Peptococcus
1868	Firmicutes	Clostridia		Clostridiales	Peptococcaceae	Peptococcus	Peptococcus
1965	Firmicutes	Clostridia		Clostridiales	Peptococcaceae	Peptococcus	Peptococcus
330	Firmicutes	Clostridia		Clostridiales	Peptostreptococcaceae	Peptostreptococcaceae Incertae Sedis	Peptostreptococcaceae Incertae Sedis
65	Firmicutes	Clostridia		Clostridiales	Peptostreptococcaceae	Peptostreptococcus	Peptostreptococcus
1081	Firmicutes	Clostridia		Clostridiales	Peptostreptococcaceae		Peptostreptococcaceae
1441	Firmicutes	Clostridia		Clostridiales	Ruminococcaceae	Faecalibacterium	Faecalibacterium
292	Firmicutes	Clostridia		Clostridiales	Ruminococcaceae	Faecalibacterium	Faecalibacterium
1878	Firmicutes	Clostridia		Clostridiales	Ruminococcaceae	Faecalibacterium	Faecalibacterium
367	Firmicutes	Clostridia		Clostridiales	Ruminococcaceae	Fastidiosipila	Fastidiosipila
1526	Firmicutes	Clostridia		Clostridiales	Ruminococcaceae	Fastidiosipila	Fastidiosipila
743	Firmicutes	Clostridia		Clostridiales	Ruminococcaceae	Sporobacter	Sporobacter
887	Firmicutes	Clostridia		Clostridiales	Ruminococcaceae		Ruminococcaceae
1345	Firmicutes	Clostridia		Clostridiales	Ruminococcaceae		Ruminococcaceae
1371	Firmicutes	Clostridia		Clostridiales	Ruminococcaceae		Ruminococcaceae
1071	Firmicutes	Clostridia		Clostridiales	Ruminococcaceae		Ruminococcaceae
1076	Firmicutes	Clostridia		Clostridiales	Ruminococcaceae		Ruminococcaceae
189	Firmicutes	Clostridia		Clostridiales	Veillonellaceae	Anaeroglobus	Anaeroglobus
1122	Firmicutes	Clostridia		Clostridiales	Veillonellaceae	Dialister	Dialister
1176	Firmicutes	Clostridia		Clostridiales	Veillonellaceae	Dialister	Dialister
2271	Firmicutes	Clostridia		Clostridiales	Veillonellaceae	Dialister	Dialister
3	Firmicutes	Clostridia		Clostridiales	Veillonellaceae	Dialister	Dialister
104	Firmicutes	Clostridia		Clostridiales	Veillonellaceae	Dialister	Dialister
1095	Firmicutes	Clostridia		Clostridiales	Veillonellaceae	Dialister	Dialister
1950	Firmicutes	Clostridia		Clostridiales	Veillonellaceae	Dialister	Dialister
2009	Firmicutes	Clostridia		Clostridiales	Veillonellaceae	Dialister	Dialister
698	Firmicutes	Clostridia		Clostridiales	Veillonellaceae	Succiniclasticum	Succiniclasticum
2114	Firmicutes	Clostridia		Clostridiales	Veillonellaceae	Veillonella	Veillonella
1483	Firmicutes	Clostridia		Clostridiales	Veillonellaceae	Veillonella	Veillonella
475	Firmicutes	Clostridia		Clostridiales	Veillonellaceae	Veillonella	Veillonella
987	Firmicutes	Clostridia		Clostridiales	Veillonellaceae	Veillonella	Veillonella
1657	Firmicutes	Clostridia		Clostridiales	Veillonellaceae	Veillonella	Veillonella
2041	Firmicutes	Clostridia		Clostridiales	Veillonellaceae	Veillonella	Veillonella
2331	Firmicutes	Clostridia		Clostridiales	Veillonellaceae	Veillonella	Veillonella
1191	Firmicutes	Clostridia		Clostridiales	Veillonellaceae		Veillonellaceae
450	Firmicutes	Clostridia		Clostridiales	Veillonellaceae		Veillonellaceae
483	Firmicutes	Clostridia		Clostridiales	Veillonellaceae		Veillonellaceae
1156	Firmicutes	Clostridia		Clostridiales	Veillonellaceae		Veillonellaceae
137	Firmicutes	Clostridia		Clostridiales			Clostridiales
1641	Firmicutes	Clostridia		Clostridiales			Clostridiales
287	Firmicutes	Clostridia		Clostridiales			Clostridiales
1876	Firmicutes	Clostridia		Clostridiales			Clostridiales
1786	Firmicutes	Clostridia		Clostridiales			Clostridiales
2084	Firmicutes	Clostridia		Clostridiales			Clostridiales
2250	Firmicutes	Clostridia		Clostridiales			Clostridiales
605	Firmicutes	Clostridia		Clostridiales			Clostridiales
487	Firmicutes	Clostridia		Clostridiales			Clostridiales
630	Firmicutes	Clostridia		Clostridiales			Clostridiales
528	Firmicutes	Clostridia		Clostridiales			Clostridiales
1951	Firmicutes	Clostridia		Clostridiales			Clostridiales
2122	Firmicutes	Clostridia		Clostridiales			Clostridiales
100	Firmicutes	Clostridia		Clostridiales			Clostridiales
504	Firmicutes	Clostridia		Clostridiales			Clostridiales
1321	Firmicutes	Clostridia		Clostridiales			Clostridiales
2116	Firmicutes	Clostridia		Clostridiales			Clostridiales
135	Firmicutes	Clostridia		Clostridiales			Clostridiales
199	Firmicutes	Clostridia		Clostridiales			Clostridiales
994	Firmicutes	Clostridia		Clostridiales			Clostridiales
1150	Firmicutes	Clostridia		Clostridiales			Clostridiales
1164	Firmicutes	Clostridia		Clostridiales			Clostridiales
1209	Firmicutes	Clostridia		Clostridiales			Clostridiales
1482	Firmicutes	Clostridia		Clostridiales			Clostridiales
1544	Firmicutes	Clostridia		Clostridiales			Clostridiales
1699	Firmicutes	Clostridia		Clostridiales			Clostridiales
1859	Firmicutes	Clostridia		Clostridiales			Clostridiales
2301	Firmicutes	Clostridia		Clostridiales			Clostridiales
33	Firmicutes	Clostridia		Clostridiales			Clostridiales
57	Firmicutes	Clostridia		Clostridiales			Clostridiales
111	Firmicutes	Clostridia		Clostridiales			Clostridiales
217	Firmicutes	Clostridia		Clostridiales			Clostridiales
250	Firmicutes	Clostridia		Clostridiales			Clostridiales
328	Firmicutes	Clostridia		Clostridiales			Clostridiales
425	Firmicutes	Clostridia		Clostridiales			Clostridiales
458	Firmicutes	Clostridia		Clostridiales			Clostridiales
521	Firmicutes	Clostridia		Clostridiales			Clostridiales
557	Firmicutes	Clostridia		Clostridiales			Clostridiales
636	Firmicutes	Clostridia		Clostridiales			Clostridiales
644	Firmicutes	Clostridia		Clostridiales			Clostridiales
746	Firmicutes	Clostridia		Clostridiales			Clostridiales
751	Firmicutes	Clostridia		Clostridiales			Clostridiales
767	Firmicutes	Clostridia		Clostridiales			Clostridiales
809	Firmicutes	Clostridia		Clostridiales			Clostridiales
810	Firmicutes	Clostridia		Clostridiales			Clostridiales
817	Firmicutes	Clostridia		Clostridiales			Clostridiales
856	Firmicutes	Clostridia		Clostridiales			Clostridiales
868	Firmicutes	Clostridia		Clostridiales			Clostridiales
880	Firmicutes	Clostridia		Clostridiales			Clostridiales
928	Firmicutes	Clostridia		Clostridiales			Clostridiales
951	Firmicutes	Clostridia		Clostridiales			Clostridiales
957	Firmicutes	Clostridia		Clostridiales			Clostridiales
988	Firmicutes	Clostridia		Clostridiales			Clostridiales
1025	Firmicutes	Clostridia		Clostridiales			Clostridiales
1033	Firmicutes	Clostridia		Clostridiales			Clostridiales
1054	Firmicutes	Clostridia		Clostridiales			Clostridiales
1062	Firmicutes	Clostridia		Clostridiales			Clostridiales
1069	Firmicutes	Clostridia		Clostridiales			Clostridiales
1121	Firmicutes	Clostridia		Clostridiales			Clostridiales
1145	Firmicutes	Clostridia		Clostridiales			Clostridiales
1172	Firmicutes	Clostridia		Clostridiales			Clostridiales
1180	Firmicutes	Clostridia		Clostridiales			Clostridiales
1218	Firmicutes	Clostridia		Clostridiales			Clostridiales
1236	Firmicutes	Clostridia		Clostridiales			Clostridiales
1266	Firmicutes	Clostridia		Clostridiales			Clostridiales
1409	Firmicutes	Clostridia		Clostridiales			Clostridiales
1424	Firmicutes	Clostridia		Clostridiales			Clostridiales
1433	Firmicutes	Clostridia		Clostridiales			Clostridiales
1539	Firmicutes	Clostridia		Clostridiales			Clostridiales
1554	Firmicutes	Clostridia		Clostridiales			Clostridiales
1571	Firmicutes	Clostridia		Clostridiales			Clostridiales
1572	Firmicutes	Clostridia		Clostridiales			Clostridiales
1651	Firmicutes	Clostridia		Clostridiales			Clostridiales
1669	Firmicutes	Clostridia		Clostridiales			Clostridiales
1797	Firmicutes	Clostridia		Clostridiales			Clostridiales
1807	Firmicutes	Clostridia		Clostridiales			Clostridiales
1910	Firmicutes	Clostridia		Clostridiales			Clostridiales
1945	Firmicutes	Clostridia		Clostridiales			Clostridiales
1996	Firmicutes	Clostridia		Clostridiales			Clostridiales
2014	Firmicutes	Clostridia		Clostridiales			Clostridiales
2028	Firmicutes	Clostridia		Clostridiales			Clostridiales
2029	Firmicutes	Clostridia		Clostridiales			Clostridiales
2133	Firmicutes	Clostridia		Clostridiales			Clostridiales
2147	Firmicutes	Clostridia		Clostridiales			Clostridiales
2163	Firmicutes	Clostridia		Clostridiales			Clostridiales
2220	Firmicutes	Clostridia		Clostridiales			Clostridiales
2236	Firmicutes	Clostridia		Clostridiales			Clostridiales
2241	Firmicutes	Clostridia		Clostridiales			Clostridiales
2292	Firmicutes	Clostridia		Clostridiales			Clostridiales
2357	Firmicutes	Clostridia		Clostridiales			Clostridiales
2137	Firmicutes	Clostridia					Clostridia
96	Firmicutes	Clostridia					Clostridia
2348	Firmicutes	Clostridia					Clostridia
215	Firmicutes	Clostridia					Clostridia
382	Firmicutes	Clostridia					Clostridia
560	Firmicutes	Clostridia					Clostridia
675	Firmicutes	Clostridia					Clostridia
785	Firmicutes	Clostridia					Clostridia
1066	Firmicutes	Clostridia					Clostridia
1098	Firmicutes	Clostridia					Clostridia
1389	Firmicutes	Clostridia					Clostridia
2099	Firmicutes	Clostridia					Clostridia
1796	Firmicutes						Firmicutes
136	Firmicutes						Firmicutes
2346	Firmicutes						Firmicutes
1582	Firmicutes						Firmicutes
1077	Firmicutes						Firmicutes
1211	Firmicutes						Firmicutes
356	Firmicutes						Firmicutes
922	Firmicutes						Firmicutes
1201	Firmicutes						Firmicutes
50	Firmicutes						Firmicutes
196	Firmicutes						Firmicutes
210	Firmicutes						Firmicutes
324	Firmicutes						Firmicutes
541	Firmicutes						Firmicutes
558	Firmicutes						Firmicutes
587	Firmicutes						Firmicutes
661	Firmicutes						Firmicutes
718	Firmicutes						Firmicutes
970	Firmicutes						Firmicutes
992	Firmicutes						Firmicutes
995	Firmicutes						Firmicutes
1051	Firmicutes						Firmicutes
1178	Firmicutes						Firmicutes
1308	Firmicutes						Firmicutes
1369	Firmicutes						Firmicutes
1467	Firmicutes						Firmicutes
1498	Firmicutes						Firmicutes
1563	Firmicutes						Firmicutes
1592	Firmicutes						Firmicutes
1620	Firmicutes						Firmicutes
1647	Firmicutes						Firmicutes
1949	Firmicutes						Firmicutes
1966	Firmicutes						Firmicutes
2056	Firmicutes						Firmicutes
2161	Firmicutes						Firmicutes
2175	Firmicutes						Firmicutes
2225	Firmicutes						Firmicutes
2240	Firmicutes						Firmicutes
2246	Firmicutes						Firmicutes
2281	Firmicutes						Firmicutes
2286	Firmicutes						Firmicutes
2153	Fusobacteria	Fusobacteria		Fusobacteriales	Fusobacteriaceae	Fusobacterium	Fusobacterium
506	Fusobacteria	Fusobacteria		Fusobacteriales	Fusobacteriaceae	Fusobacterium	Fusobacterium
1101	Fusobacteria	Fusobacteria		Fusobacteriales	Fusobacteriaceae	Leptotrichia	Leptotrichia
125	Fusobacteria	Fusobacteria		Fusobacteriales	Fusobacteriaceae	Leptotrichia	Leptotrichia
233	Fusobacteria	Fusobacteria		Fusobacteriales	Fusobacteriaceae	Leptotrichia	Leptotrichia
1190	Fusobacteria	Fusobacteria		Fusobacteriales	Fusobacteriaceae	Leptotrichia	Leptotrichia
2055	Fusobacteria	Fusobacteria		Fusobacteriales	Fusobacteriaceae	Leptotrichia	Leptotrichia
1850	Proteobacteria	Alphaproteobacteria		Caulobacterales	Caulobacteraceae	Brevundimonas	Brevundimonas
1118	Proteobacteria	Alphaproteobacteria		Caulobacterales	Caulobacteraceae	Brevundimonas	Brevundimonas
658	Proteobacteria	Alphaproteobacteria		Caulobacterales	Caulobacteraceae	Brevundimonas	Brevundimonas
214	Proteobacteria	Alphaproteobacteria		Caulobacterales	Caulobacteraceae	Brevundimonas	Brevundimonas
479	Proteobacteria	Alphaproteobacteria		Caulobacterales	Caulobacteraceae	Brevundimonas	Brevundimonas
689	Proteobacteria	Alphaproteobacteria		Caulobacterales	Caulobacteraceae	Brevundimonas	Brevundimonas
1208	Proteobacteria	Alphaproteobacteria		Caulobacterales	Caulobacteraceae	Brevundimonas	Brevundimonas
2076	Proteobacteria	Alphaproteobacteria		Caulobacterales	Caulobacteraceae	Caulobacter	Caulobacter
228	Proteobacteria	Alphaproteobacteria		Caulobacterales	Caulobacteraceae	Phenylobacterium	Phenylobacterium
600	Proteobacteria	Alphaproteobacteria		Caulobacterales	Caulobacteraceae	Phenylobacterium	Phenylobacterium
1019	Proteobacteria	Alphaproteobacteria		Caulobacterales	Caulobacteraceae	Phenylobacterium	Phenylobacterium
1133	Proteobacteria	Alphaproteobacteria		Caulobacterales	Caulobacteraceae	Phenylobacterium	Phenylobacterium
1845	Proteobacteria	Alphaproteobacteria		Caulobacterales	Caulobacteraceae	Phenylobacterium	Phenylobacterium
1861	Proteobacteria	Alphaproteobacteria		Rhizobiales	Bradyrhizobiaceae	Agromonas	Agromonas
858	Proteobacteria	Alphaproteobacteria		Rhizobiales	Bradyrhizobiaceae	Bosea	Bosea
2325	Proteobacteria	Alphaproteobacteria		Rhizobiales	Bradyrhizobiaceae	Bradyrhizobium	Bradyrhizobium
1046	Proteobacteria	Alphaproteobacteria		Rhizobiales	Bradyrhizobiaceae		Bradyrhizobiaceae
1806	Proteobacteria	Alphaproteobacteria		Rhizobiales	Bradyrhizobiaceae		Bradyrhizobiaceae
470	Proteobacteria	Alphaproteobacteria		Rhizobiales	Bradyrhizobiaceae		Bradyrhizobiaceae
427	Proteobacteria	Alphaproteobacteria		Rhizobiales	Bradyrhizobiaceae		Bradyrhizobiaceae
1581	Proteobacteria	Alphaproteobacteria		Rhizobiales	Bradyrhizobiaceae		Bradyrhizobiaceae
641	Proteobacteria	Alphaproteobacteria		Rhizobiales	Brucellaceae		Brucellaceae
1326	Proteobacteria	Alphaproteobacteria		Rhizobiales	Hyphomicrobiaceae	Hyphomicrobium	Hyphomicrobium
1963	Proteobacteria	Alphaproteobacteria		Rhizobiales	Hyphomicrobiaceae	Pedomicrobium	Pedomicrobium
448	Proteobacteria	Alphaproteobacteria		Rhizobiales	Methylobacteriaceae	Methylobacterium	Methylobacterium
358	Proteobacteria	Alphaproteobacteria		Rhizobiales	Methylobacteriaceae	Methylobacterium	Methylobacterium
306	Proteobacteria	Alphaproteobacteria		Rhizobiales	Methylobacteriaceae	Methylobacterium	Methylobacterium
1759	Proteobacteria	Alphaproteobacteria		Rhizobiales	Phyllobacteriaceae	Mesorhizobium	Mesorhizobium
12	Proteobacteria	Alphaproteobacteria		Rhizobiales			Rhizobiales
139	Proteobacteria	Alphaproteobacteria		Rhizobiales			Rhizobiales
974	Proteobacteria	Alphaproteobacteria		Rhizobiales			Rhizobiales
2074	Proteobacteria	Alphaproteobacteria		Rhizobiales			Rhizobiales
680	Proteobacteria	Alphaproteobacteria		Rhodobacterales	Rhodobacteraceae		Rhodobacteraceae
676	Proteobacteria	Alphaproteobacteria		Rhodobacterales	Rhodobacteraceae		Rhodobacteraceae
795	Proteobacteria	Alphaproteobacteria		Rhodobacterales	Rhodobacteraceae		Rhodobacteraceae
442	Proteobacteria	Alphaproteobacteria		Rhodobacterales	Rhodobacteraceae		Rhodobacteraceae
1439	Proteobacteria	Alphaproteobacteria		Rhodospirillales	Acetobacteraceae		Acetobacteraceae
1305	Proteobacteria	Alphaproteobacteria		Rhodospirillales	Acetobacteraceae		Acetobacteraceae
341	Proteobacteria	Alphaproteobacteria		Rhodospirillales	Rhodospirillaceae	Skermanella	Skermanella
1947	Proteobacteria	Alphaproteobacteria		Rhodospirillales	Rhodospirillaceae	Skermanella	Skermanella
1442	Proteobacteria	Alphaproteobacteria		Rhodospirillales			Rhodospirillales
2230	Proteobacteria	Alphaproteobacteria		Sphingomonadales	Sphingomonadaceae	Erythrobacter	Erythrobacter
2104	Proteobacteria	Alphaproteobacteria		Sphingomonadales	Sphingomonadaceae	Novosphingobium	Novosphingobium
2299	Proteobacteria	Alphaproteobacteria		Sphingomonadales	Sphingomonadaceae	Sphingobium	Sphingobium
1972	Proteobacteria	Alphaproteobacteria		Sphingomonadales	Sphingomonadaceae	Sphingomonas	Sphingomonas
1715	Proteobacteria	Alphaproteobacteria		Sphingomonadales	Sphingomonadaceae	Sphingomonas	Sphingomonas
1532	Proteobacteria	Alphaproteobacteria		Sphingomonadales	Sphingomonadaceae	Sphingomonas	Sphingomonas
693	Proteobacteria	Alphaproteobacteria		Sphingomonadales	Sphingomonadaceae	Sphingomonas	Sphingomonas
989	Proteobacteria	Alphaproteobacteria		Sphingomonadales	Sphingomonadaceae	Sphingomonas	Sphingomonas
960	Proteobacteria	Alphaproteobacteria		Sphingomonadales	Sphingomonadaceae	Sphingomonas	Sphingomonas
134	Proteobacteria	Alphaproteobacteria		Sphingomonadales	Sphingomonadaceae	Sphingopyxis	Sphingopyxis
531	Proteobacteria	Alphaproteobacteria		Sphingomonadales	Sphingomonadaceae	Sphingopyxis	Sphingopyxis
84	Proteobacteria	Alphaproteobacteria		Sphingomonadales	Sphingomonadaceae		Sphingomonadaceae
781	Proteobacteria	Alphaproteobacteria		Sphingomonadales	Sphingomonadaceae		Sphingomonadaceae
827	Proteobacteria	Alphaproteobacteria		Sphingomonadales	Sphingomonadaceae		Sphingomonadaceae
1036	Proteobacteria	Alphaproteobacteria		Sphingomonadales	Sphingomonadaceae		Sphingomonadaceae
2130	Proteobacteria	Alphaproteobacteria		Sphingomonadales	Sphingomonadaceae		Sphingomonadaceae
278	Proteobacteria	Alphaproteobacteria					Alphaproteobacteria
905	Proteobacteria	Alphaproteobacteria					Alphaproteobacteria
105	Proteobacteria	Betaproteobacteria		Burkholderiales	Alcaligenaceae	Achromobacter	Achromobacter
115	Proteobacteria	Betaproteobacteria		Burkholderiales	Alcaligenaceae	Sutterella	Sutterella
741	Proteobacteria	Betaproteobacteria		Burkholderiales	Alcaligenaceae		Alcaligenaceae
593	Proteobacteria	Betaproteobacteria		Burkholderiales	Burkholderiaceae	Burkholderia	Burkholderia
1891	Proteobacteria	Betaproteobacteria		Burkholderiales	Burkholderiaceae	Cupriavidus	Cupriavidus
1508	Proteobacteria	Betaproteobacteria		Burkholderiales	Burkholderiaceae	Limnobacter	Limnobacter
1567	Proteobacteria	Betaproteobacteria		Burkholderiales	Burkholderiaceae	Ralstonia	Ralstonia
1390	Proteobacteria	Betaproteobacteria		Burkholderiales	Burkholderiaceae	Wautersia	Wautersia
2311	Proteobacteria	Betaproteobacteria		Burkholderiales	Burkholderiaceae	Wautersia	Wautersia
690	Proteobacteria	Betaproteobacteria		Burkholderiales	Burkholderiaceae		Burkholderiaceae
1045	Proteobacteria	Betaproteobacteria		Burkholderiales	Burkholderiaceae		Burkholderiaceae
1709	Proteobacteria	Betaproteobacteria		Burkholderiales	Comamonadaceae	Caenibacterium	Caenibacterium
1068	Proteobacteria	Betaproteobacteria		Burkholderiales	Comamonadaceae	Polaromonas	Polaromonas
2184	Proteobacteria	Betaproteobacteria		Burkholderiales	Comamonadaceae		Comamonadaceae
6	Proteobacteria	Betaproteobacteria		Burkholderiales	Comamonadaceae		Comamonadaceae
175	Proteobacteria	Betaproteobacteria		Burkholderiales	Incertae sedis 5	Aquabacterium	Aquabacterium
392	Proteobacteria	Betaproteobacteria		Burkholderiales	Incertae sedis 5	Aquabacterium	Aquabacterium
1401	Proteobacteria	Betaproteobacteria		Burkholderiales	Incertae sedis 5	Pelomonas	Pelomonas
2310	Proteobacteria	Betaproteobacteria		Burkholderiales	Incertae sedis 5		Incertae sedis 5
1474	Proteobacteria	Betaproteobacteria		Burkholderiales	Oxalobacteraceae	Janthinobacterium	Janthinobacterium
1252	Proteobacteria	Betaproteobacteria		Burkholderiales	Oxalobacteraceae		Oxalobacteraceae
1989	Proteobacteria	Betaproteobacteria		Burkholderiales	Oxalobacteraceae		Oxalobacteraceae
1301	Proteobacteria	Betaproteobacteria		Burkholderiales			Burkholderiales
259	Proteobacteria	Betaproteobacteria		Burkholderiales			Burkholderiales
1782	Proteobacteria	Betaproteobacteria		Burkholderiales			Burkholderiales
1394	Proteobacteria	Betaproteobacteria		Burkholderiales			Burkholderiales
2065	Proteobacteria	Betaproteobacteria		Burkholderiales			Burkholderiales
1729	Proteobacteria	Betaproteobacteria		Burkholderiales			Burkholderiales
1785	Proteobacteria	Betaproteobacteria		Burkholderiales			Burkholderiales
128	Proteobacteria	Betaproteobacteria		Burkholderiales			Burkholderiales
513	Proteobacteria	Betaproteobacteria		Burkholderiales			Burkholderiales
1060	Proteobacteria	Betaproteobacteria		Burkholderiales			Burkholderiales
1307	Proteobacteria	Betaproteobacteria		Burkholderiales			Burkholderiales
1649	Proteobacteria	Betaproteobacteria		Burkholderiales			Burkholderiales
1726	Proteobacteria	Betaproteobacteria		Burkholderiales			Burkholderiales
1461	Proteobacteria	Betaproteobacteria		Methylophilales	Methylophilaceae		Methylophilaceae
1831	Proteobacteria	Betaproteobacteria		Neisseriales	Neisseriaceae	Neisseria	Neisseria
488	Proteobacteria	Betaproteobacteria		Neisseriales	Neisseriaceae		Neisseriaceae
662	Proteobacteria	Betaproteobacteria		Neisseriales	Neisseriaceae		Neisseriaceae
2332	Proteobacteria	Betaproteobacteria		Neisseriales	Neisseriaceae		Neisseriaceae
1384	Proteobacteria	Betaproteobacteria		Nitrosomonadales	Nitrosomonadaceae	Nitrosomonas	Nitrosomonas
700	Proteobacteria	Betaproteobacteria		Rhodocyclales	Rhodocyclaceae	Zoogloea	Zoogloea
1961	Proteobacteria	Betaproteobacteria		Rhodocyclales	Rhodocyclaceae		Rhodocyclaceae
226	Proteobacteria	Betaproteobacteria					Betaproteobacteria
127	Proteobacteria	Betaproteobacteria					Betaproteobacteria
1073	Proteobacteria	Betaproteobacteria					Betaproteobacteria
1407	Proteobacteria	Betaproteobacteria					Betaproteobacteria
1614	Proteobacteria	Deltaproteobacteria		Desulfovibrionales	Desulfovibrionaceae	Bilophila	Bilophila
1537	Proteobacteria	Deltaproteobacteria		Desulfovibrionales	Desulfovibrionaceae	Desulfovibrio	Desulfovibrio
1256	Proteobacteria	Deltaproteobacteria		Desulfovibrionales	Desulfovibrionaceae	Desulfovibrio	Desulfovibrio
1618	Proteobacteria	Deltaproteobacteria		Myxococcales	Sorangineae	Polyangiaceae	Polyangiaceae
2255	Proteobacteria	Deltaproteobacteria		Myxococcales	Sorangineae	Polyangiaceae	Polyangiaceae
2154	Proteobacteria	Deltaproteobacteria		Myxococcales			Myxococcales
1830	Proteobacteria	Deltaproteobacteria					Deltaproteobacteria
2300	Proteobacteria	Epsilonproteobacteria		Campylobacterales	Campylobacteraceae	Campylobacter	Campylobacter
1881	Proteobacteria	Epsilonproteobacteria		Campylobacterales	Campylobacteraceae	Campylobacter	Campylobacter
1479	Proteobacteria	Epsilonproteobacteria		Campylobacterales	Campylobacteraceae	Campylobacter	Campylobacter
361	Proteobacteria	Epsilonproteobacteria		Campylobacterales	Campylobacteraceae	Campylobacter	Campylobacter
797	Proteobacteria	Epsilonproteobacteria		Campylobacterales	Campylobacteraceae	Campylobacter	Campylobacter
1631	Proteobacteria	Epsilonproteobacteria		Campylobacterales	Campylobacteraceae	Campylobacter	Campylobacter
308	Proteobacteria	Epsilonproteobacteria		Campylobacterales	Campylobacteraceae	Campylobacter	Campylobacter
1427	Proteobacteria	Epsilonproteobacteria		Campylobacterales	Campylobacteraceae	Campylobacter	Campylobacter
1761	Proteobacteria	Epsilonproteobacteria		Campylobacterales	Campylobacteraceae	Campylobacter	Campylobacter
2200	Proteobacteria	Epsilonproteobacteria		Campylobacterales	Campylobacteraceae	Campylobacter	Campylobacter
2328	Proteobacteria	Epsilonproteobacteria		Campylobacterales	Campylobacteraceae	Campylobacter	Campylobacter
1778	Proteobacteria	Epsilonproteobacteria		Campylobacterales			Campylobacterales
234	Proteobacteria	Epsilonproteobacteria		Campylobacterales			Campylobacterales
237	Proteobacteria	Epsilonproteobacteria		Campylobacterales			Campylobacterales
271	Proteobacteria	Epsilonproteobacteria		Campylobacterales			Campylobacterales
390	Proteobacteria	Epsilonproteobacteria		Campylobacterales			Campylobacterales
1317	Proteobacteria	Epsilonproteobacteria		Campylobacterales			Campylobacterales
650	Proteobacteria	Gammaproteobacteria		Aeromonadales	Aeromonadaceae	Aeromonas	Aeromonas
2036	Proteobacteria	Gammaproteobacteria		Alteromonadales	Incertae sedis 7	Microbulbifer	Microbulbifer
45	Proteobacteria	Gammaproteobacteria		Enterobacteriales	Enterobacteriaceae	Pantoea	Pantoea
1212	Proteobacteria	Gammaproteobacteria		Enterobacteriales	Enterobacteriaceae		Enterobacteriaceae
162	Proteobacteria	Gammaproteobacteria		Enterobacteriales	Enterobacteriaceae		Enterobacteriaceae
1983	Proteobacteria	Gammaproteobacteria		Oceanospirillales	Alcanivoraceae	Alcanivorax	Alcanivorax
1524	Proteobacteria	Gammaproteobacteria		Oceanospirillales	Halomonadaceae		Halomonadaceae
598	Proteobacteria	Gammaproteobacteria		Oceanospirillales	Oceanospirillaceae	Marinomonas	Marinomonas
340	Proteobacteria	Gammaproteobacteria		Pasteurellales	Pasteurellaceae	Actinobacillus	Actinobacillus
2042	Proteobacteria	Gammaproteobacteria		Pasteurellales	Pasteurellaceae	Actinobacillus	Actinobacillus
151	Proteobacteria	Gammaproteobacteria		Pasteurellales	Pasteurellaceae		Pasteurellaceae
614	Proteobacteria	Gammaproteobacteria		Pasteurellales	Pasteurellaceae		Pasteurellaceae
826	Proteobacteria	Gammaproteobacteria		Pasteurellales	Pasteurellaceae		Pasteurellaceae
1370	Proteobacteria	Gammaproteobacteria		Pasteurellales	Pasteurellaceae		Pasteurellaceae
1470	Proteobacteria	Gammaproteobacteria		Pasteurellales	Pasteurellaceae		Pasteurellaceae
2093	Proteobacteria	Gammaproteobacteria		Pasteurellales	Pasteurellaceae		Pasteurellaceae
1088	Proteobacteria	Gammaproteobacteria		Pseudomonadales	Incertae sedis 6	Enhydrobacter	Enhydrobacter
1304	Proteobacteria	Gammaproteobacteria		Pseudomonadales	Moraxellaceae	Acinetobacter	Acinetobacter
628	Proteobacteria	Gammaproteobacteria		Pseudomonadales	Moraxellaceae	Acinetobacter	Acinetobacter
1452	Proteobacteria	Gammaproteobacteria		Pseudomonadales	Moraxellaceae	Acinetobacter	Acinetobacter
2077	Proteobacteria	Gammaproteobacteria		Pseudomonadales	Moraxellaceae	Acinetobacter	Acinetobacter
1616	Proteobacteria	Gammaproteobacteria		Pseudomonadales	Moraxellaceae	Acinetobacter	Acinetobacter
60	Proteobacteria	Gammaproteobacteria		Pseudomonadales	Moraxellaceae	Acinetobacter	Acinetobacter
155	Proteobacteria	Gammaproteobacteria		Pseudomonadales	Moraxellaceae	Acinetobacter	Acinetobacter
1243	Proteobacteria	Gammaproteobacteria		Pseudomonadales	Moraxellaceae	Acinetobacter	Acinetobacter
1268	Proteobacteria	Gammaproteobacteria		Pseudomonadales	Moraxellaceae	Acinetobacter	Acinetobacter
1438	Proteobacteria	Gammaproteobacteria		Pseudomonadales	Moraxellaceae	Acinetobacter	Acinetobacter
1990	Proteobacteria	Gammaproteobacteria		Pseudomonadales	Moraxellaceae	Acinetobacter	Acinetobacter
1008	Proteobacteria	Gammaproteobacteria		Pseudomonadales	Moraxellaceae	Branhamella	Branhamella
17	Proteobacteria	Gammaproteobacteria		Pseudomonadales	Moraxellaceae	Branhamella	Branhamella
1693	Proteobacteria	Gammaproteobacteria		Pseudomonadales	Moraxellaceae	Branhamella	Branhamella
515	Proteobacteria	Gammaproteobacteria		Pseudomonadales	Moraxellaceae	Moraxella	Moraxella
1849	Proteobacteria	Gammaproteobacteria		Pseudomonadales	Moraxellaceae		Moraxellaceae
1994	Proteobacteria	Gammaproteobacteria		Pseudomonadales	Moraxellaceae		Moraxellaceae
2051	Proteobacteria	Gammaproteobacteria		Pseudomonadales	Moraxellaceae		Moraxellaceae
2061	Proteobacteria	Gammaproteobacteria		Pseudomonadales	Pseudomonadaceae	Cellvibrio	Cellvibrio
2296	Proteobacteria	Gammaproteobacteria		Pseudomonadales	Pseudomonadaceae	Pseudomonas	Pseudomonas
1126	Proteobacteria	Gammaproteobacteria		Pseudomonadales	Pseudomonadaceae	Pseudomonas	Pseudomonas
2101	Proteobacteria	Gammaproteobacteria		Pseudomonadales	Pseudomonadaceae		Pseudomonadaceae
1755	Proteobacteria	Gammaproteobacteria		Pseudomonadales	Pseudomonadaceae		Pseudomonadaceae
582	Proteobacteria	Gammaproteobacteria		Pseudomonadales	Pseudomonadaceae		Pseudomonadaceae
1339	Proteobacteria	Gammaproteobacteria		Xanthomonadales	Xanthomonadaceae	Nevskia	Nevskia
1974	Proteobacteria	Gammaproteobacteria		Xanthomonadales	Xanthomonadaceae	Nevskia	Nevskia
1575	Proteobacteria	Gammaproteobacteria		Xanthomonadales	Xanthomonadaceae	Pseudoxanthomonas	Pseudoxanthomonas
1638	Proteobacteria	Gammaproteobacteria		Xanthomonadales	Xanthomonadaceae	Pseudoxanthomonas	Pseudoxanthomonas
2069	Proteobacteria	Gammaproteobacteria		Xanthomonadales	Xanthomonadaceae	Stenotrophomonas	Stenotrophomonas
914	Proteobacteria	Gammaproteobacteria		Xanthomonadales	Xanthomonadaceae	Stenotrophomonas	Stenotrophomonas
2157	Proteobacteria	Gammaproteobacteria		Xanthomonadales	Xanthomonadaceae	Stenotrophomonas	Stenotrophomonas
1984	Proteobacteria	Gammaproteobacteria		Xanthomonadales	Xanthomonadaceae		Xanthomonadaceae
1456	Proteobacteria	Gammaproteobacteria		Xanthomonadales	Xanthomonadaceae		Xanthomonadaceae
517	Proteobacteria	Gammaproteobacteria		Xanthomonadales	Xanthomonadaceae		Xanthomonadaceae
2244	Proteobacteria	Gammaproteobacteria		Xanthomonadales	Xanthomonadaceae		Xanthomonadaceae
583	Proteobacteria	Gammaproteobacteria		Xanthomonadales	Xanthomonadaceae		Xanthomonadaceae
2306	Proteobacteria	Gammaproteobacteria					Gammaproteobacteria
885	Proteobacteria	Gammaproteobacteria					Gammaproteobacteria
2094	Proteobacteria	Gammaproteobacteria					Gammaproteobacteria
360	Proteobacteria	Gammaproteobacteria					Gammaproteobacteria
740	Proteobacteria	Gammaproteobacteria					Gammaproteobacteria
1837	Proteobacteria	Gammaproteobacteria					Gammaproteobacteria
145	Proteobacteria						Proteobacteria
5	Proteobacteria						Proteobacteria
2048	Proteobacteria						Proteobacteria
1352	Spirochaetes	Spirochaetes		Spirochaetales	Spirochaetaceae	Treponema	Treponema
1596	SR1	SR1_genera_incertae_sedis					unidentified
63							unidentified
1518							unidentified
343							unidentified
300							unidentified
1079							unidentified
81							unidentified
415							unidentified
1636							unidentified
549							unidentified
1328							unidentified
677							unidentified
2190							unidentified
255							unidentified
1744							unidentified
1323							unidentified
688							unidentified
1028							unidentified
1867							unidentified
2337							unidentified
835							unidentified
921							unidentified
926							unidentified
1593							unidentified
1765							unidentified
183							unidentified
481							unidentified
659							unidentified
1612							unidentified
1635							unidentified
2128							unidentified
2145							unidentified
240							unidentified
244							unidentified
466							unidentified
1238							unidentified
1793							unidentified
2049							unidentified
73							unidentified
269							unidentified
457							unidentified
824							unidentified
861							unidentified
1163							unidentified
1240							unidentified
1367							unidentified
1784							unidentified
1954							unidentified
2275							unidentified
142							unidentified
293							unidentified
329							unidentified
426							unidentified
544							unidentified
579							unidentified
595							unidentified
778							unidentified
947							unidentified
962							unidentified
985							unidentified
1035							unidentified
1110							unidentified
1422							unidentified
1463							unidentified
1484							unidentified
1561							unidentified
1583							unidentified
1749							unidentified
1893							unidentified
1997							unidentified
2003							unidentified
2085							unidentified
2089							unidentified
2125							unidentified
2204							unidentified
2208							unidentified
2252							unidentified
2318							unidentified
41							unidentified
49							unidentified
76							unidentified
86							unidentified
89							unidentified
99							unidentified
119							unidentified
132							unidentified
133							unidentified
144							unidentified
146							unidentified
170							unidentified
224							unidentified
229							unidentified
275							unidentified
281							unidentified
307							unidentified
309							unidentified
326							unidentified
350							unidentified
370							unidentified
393							unidentified
413							unidentified
416							unidentified
480							unidentified
486							unidentified
501							unidentified
508							unidentified
514							unidentified
532							unidentified
559							unidentified
585							unidentified
629							unidentified
634							unidentified
635							unidentified
645							unidentified
666							unidentified
671							unidentified
682							unidentified
702							unidentified
709							unidentified
713							unidentified
724							unidentified
754							unidentified
790							unidentified
803							unidentified
813							unidentified
819							unidentified
842							unidentified
851							unidentified
862							unidentified
865							unidentified
866							unidentified
871							unidentified
873							unidentified
878							unidentified
881							unidentified
883							unidentified
889							unidentified
901							unidentified
997							unidentified
1010							unidentified
1052							unidentified
1061							unidentified
1084							unidentified
1087							unidentified
1139							unidentified
1146							unidentified
1148							unidentified
1173							unidentified
1181							unidentified
1206							unidentified
1235							unidentified
1245							unidentified
1261							unidentified
1273							unidentified
1348							unidentified
1356							unidentified
1383							unidentified
1395							unidentified
1419							unidentified
1450							unidentified
1480							unidentified
1507							unidentified
1511							unidentified
1534							unidentified
1548							unidentified
1562							unidentified
1565							unidentified
1595							unidentified
1597							unidentified
1603							unidentified
1604							unidentified
1628							unidentified
1658							unidentified
1660							unidentified
1665							unidentified
1694							unidentified
1713							unidentified
1758							unidentified
1788							unidentified
1800							unidentified
1801							unidentified
1813							unidentified
1817							unidentified
1819							unidentified
1821							unidentified
1823							unidentified
1833							unidentified
1835							unidentified
1838							unidentified
1844							unidentified
1858							unidentified
1862							unidentified
1872							unidentified
1884							unidentified
1897							unidentified
1902							unidentified
1914							unidentified
1956							unidentified
1967							unidentified
1968							unidentified
1969							unidentified
1980							unidentified
1991							unidentified
1993							unidentified
2005							unidentified
2012							unidentified
2018							unidentified
2025							unidentified
2037							unidentified
2045							unidentified
2053							unidentified
2066							unidentified
2091							unidentified
2092							unidentified
2098							unidentified
2107							unidentified
2111							unidentified
2121							unidentified
2156							unidentified
2171							unidentified
2189							unidentified
2197							unidentified
2223							unidentified
2227							unidentified
2243							unidentified
2268							unidentified
2277							unidentified
2283							unidentified
2288							unidentified
2293							unidentified
2294							unidentified
2345							unidentified
2350							unidentified
2367							unidentified
394							unidentified
441							unidentified
1359							unidentified
